# Supplementary material for: Effects of a short‐term cold exposure on circulating microRNAs and metabolic parameters in healthy adult subjects
Source: PubMed Central journal article supplement (PMC8743656; doi:10.1111/jcmm.17121), 2021-12-17

Supplemental Figure 1: Cooling vest used for the study

CFF

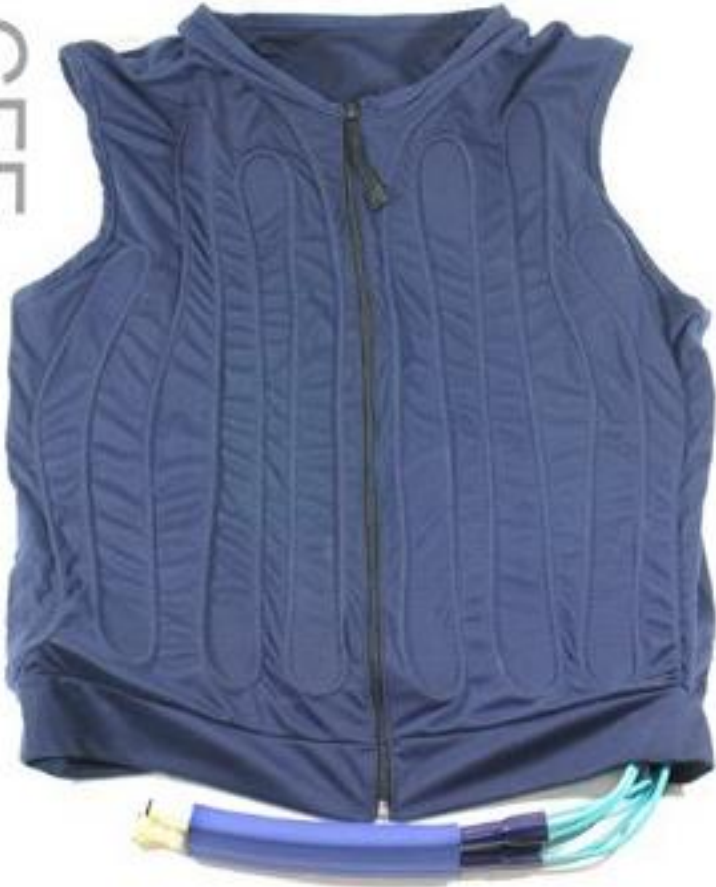

Cool Flow® Fitted Vest System

**Supplemental Figure 2: Discomfort Visual Analog Scale used in the study**

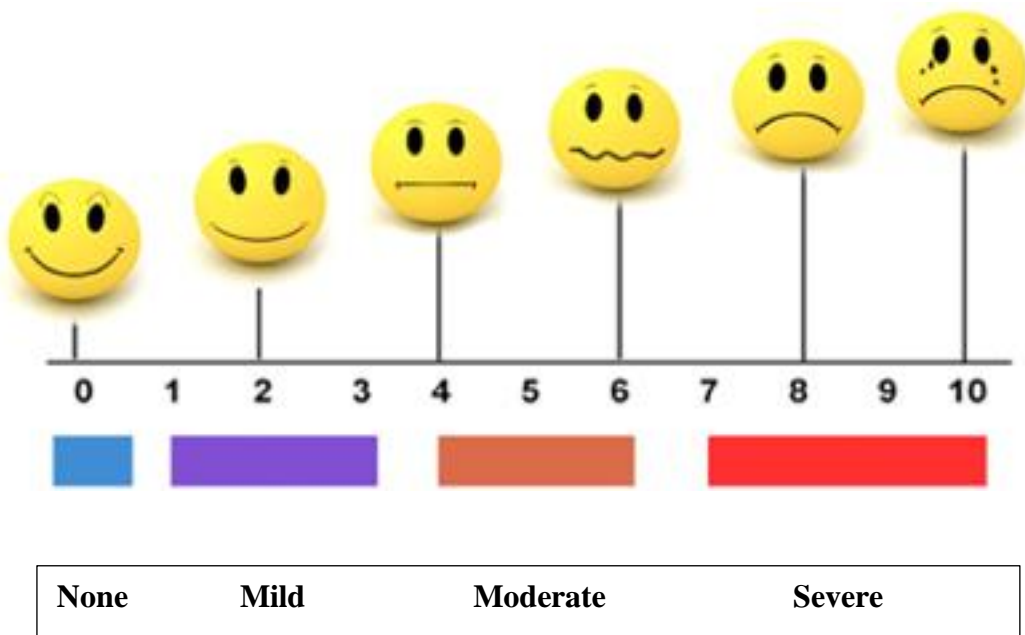

Supplement: JCMM-26-548-s001.pdf [file JCMM-26-548-s001.pdf]
