# Supplementary material for: Effects of a short‐term cold exposure on circulating microRNAs and metabolic parameters in healthy adult subjects
Source: PubMed Central journal article supplement (PMC8743656; doi:10.1111/jcmm.17121), 2021-12-17
Supplement: JCMM-26-548-s002.pdf [file JCMM-26-548-s002.pdf]

**miRNA correlations to copeptin, C-peptide and norepinephrine.** Column 1, miRNA name; col 2, correlation value; col 3, p-value of correlation; col 4, fdr estimate of correlation; col 5, analyte name; col 6, correlation method.

| gene              | r            | p           | fdr         | phenotype | method  |
|-------------------|--------------|-------------|-------------|-----------|---------|
| hsa.mir.369.5p    | 0.072067295  | 0.680773788 | 0.966407403 | copeptin  | pearson |
| hsa.mir.411.3p    | 0.01333307   | 0.943248323 | 0.97904585  | copeptin  | pearson |
| hsa.mir.29b.1.3p  | 0.390230549  | 0.027242512 | 0.893634813 | copeptin  | pearson |
| hsa.mir.29b.2.3p  | 0.332832924  | 0.067318665 | 0.893634813 | copeptin  | pearson |
| hsa.mir.941.1     | 0.331888249  | 0.073171311 | 0.893634813 | copeptin  | pearson |
| hsa.mir.654.5p    | 0.043690365  | 0.806189732 | 0.968587664 | copeptin  | pearson |
| hsa.mir.411.5p    | 0.103776356  | 0.55917882  | 0.935167048 | copeptin  | pearson |
| hsa.mir.181a.1.3p | -0.110908857 | 0.559580191 | 0.935167048 | copeptin  | pearson |
| hsa.mir.1307.5p   | 0.001779159  | 0.992159798 | 0.996476    | copeptin  | pearson |
| hsa.mir.493.3p    | 0.043887005  | 0.793609554 | 0.968587664 | copeptin  | pearson |
| hsa.mir.26b.3p    | 0.012006006  | 0.948889187 | 0.97904585  | copeptin  | pearson |
| hsa.mir.22.5p     | -0.604527043 | 0.000315908 | 0.052756633 | copeptin  | pearson |
| hsa.mir.21.3p     | -0.155724069 | 0.411234042 | 0.935167048 | copeptin  | pearson |
| hsa.mir.501.3p    | 0.13020548   | 0.477529579 | 0.935167048 | copeptin  | pearson |
| hsa.mir.454.3p    | -0.007296719 | 0.967853404 | 0.97958496  | copeptin  | pearson |
| hsa.mir.486.1.3p  | -0.029245509 | 0.861632661 | 0.97904585  | copeptin  | pearson |
| hsa.mir.323a.3p   | 0.13066519   | 0.491306738 | 0.935167048 | copeptin  | pearson |
| hsa.mir.144.5p    | 0.08833539   | 0.597930779 | 0.935167048 | copeptin  | pearson |
| hsa.mir.374a.5p   | -0.256299064 | 0.125719416 | 0.893634813 | copeptin  | pearson |
| hsa.mir.148a.5p   | 0.051832929  | 0.770954867 | 0.968587664 | copeptin  | pearson |
| hsa.mir.495.3p    | 0.077806615  | 0.64242207  | 0.935411011 | copeptin  | pearson |
| hsa.mir.493.5p    | -0.090684867 | 0.588188666 | 0.935167048 | copeptin  | pearson |
| hsa.mir.432.5p    | -0.030651249 | 0.872260637 | 0.97904585  | copeptin  | pearson |
| hsa.mir.425.3p    | -0.18698392  | 0.282124716 | 0.893634813 | copeptin  | pearson |
| hsa.mir.424.3p    | -0.393925407 | 0.03124901  | 0.893634813 | copeptin  | pearson |
| hsa.mir.485.3p    | 0.226204807  | 0.178221905 | 0.893634813 | copeptin  | pearson |
| hsa.mir.369.3p    | 0.079525712  | 0.649746571 | 0.935411011 | copeptin  | pearson |
| hsa.mir.330.3p    | -0.256800237 | 0.124955611 | 0.893634813 | copeptin  | pearson |
| hsa.mir.339.5p    | -0.288432419 | 0.074958845 | 0.893634813 | copeptin  | pearson |
| hsa.mir.4433b.5p  | -0.172201088 | 0.294517509 | 0.893634813 | copeptin  | pearson |
| hsa.mir.23b.3p    | -0.106982178 | 0.528547595 | 0.935167048 | copeptin  | pearson |
| hsa.mir.1180.3p   | 0.019169298  | 0.910339431 | 0.97904585  | copeptin  | pearson |
| hsa.mir.654.3p    | 0.114370834  | 0.488129147 | 0.935167048 | copeptin  | pearson |
| hsa.mir.409.3p    | 0.17478365   | 0.287224906 | 0.893634813 | copeptin  | pearson |
| hsa.mir.181d.5p   | -0.198251655 | 0.261031076 | 0.893634813 | copeptin  | pearson |
| hsa.mir.19a.3p    | -0.048255863 | 0.789719107 | 0.968587664 | copeptin  | pearson |
| hsa.mir.421       | 0.020609642  | 0.909364442 | 0.97904585  | copeptin  | pearson |
| hsa.mir.339.3p    | -0.114480768 | 0.506156446 | 0.935167048 | copeptin  | pearson |
| hsa.mir.342.3p    | 0.219627822  | 0.191516678 | 0.893634813 | copeptin  | pearson |
| hsa.mir.183.5p    | -0.060300769 | 0.719124488 | 0.966407403 | copeptin  | pearson |
| hsa.mir.340.3p    | -0.076813231 | 0.642089733 | 0.935411011 | copeptin  | pearson |
| hsa.mir.381.3p    | 0.126970203  | 0.441148281 | 0.935167048 | copeptin  | pearson |
| hsa.mir.370.3p    | 0.028314383  | 0.867880337 | 0.97904585  | copeptin  | pearson |
| hsa.mir.335.5p    | -0.155214584 | 0.358983005 | 0.908335785 | copeptin  | pearson |
| hsa.mir.134.5p    | 0.135538066  | 0.423797782 | 0.935167048 | copeptin  | pearson |
| hsa.mir.494.3p    | -0.021458986 | 0.910384026 | 0.97904585  | copeptin  | pearson |
| hsa.mir.125b.1.5p | -0.053316554 | 0.743862047 | 0.966407403 | copeptin  | pearson |
| hsa.mir.130a.3p   | 0.134113228  | 0.422120028 | 0.935167048 | copeptin  | pearson |
| hsa.let.7e.5p     | -0.161227263 | 0.326819824 | 0.893634813 | copeptin  | pearson |
| hsa.mir.543       | 0.105693398  | 0.516281029 | 0.935167048 | copeptin  | pearson |
| hsa.mir.30b.5p    | -0.233713187 | 0.157884298 | 0.893634813 | copeptin  | pearson |

|                   |              |             |             |          |         |
|-------------------|--------------|-------------|-------------|----------|---------|
| hsa.mir.625.3p    | -0.183939537 | 0.268957183 | 0.893634813 | copeptin | pearson |
| hsa.mir.335.3p    | -0.251359253 | 0.133434932 | 0.893634813 | copeptin | pearson |
| hsa.mir.197.3p    | -0.096543996 | 0.564205519 | 0.935167048 | copeptin | pearson |
| hsa.mir.130b.5p   | -0.11545318  | 0.496218712 | 0.935167048 | copeptin | pearson |
| hsa.mir.375       | -0.229849342 | 0.153642643 | 0.893634813 | copeptin | pearson |
| hsa.mir.18a.5p    | -0.164688571 | 0.316401595 | 0.893634813 | copeptin | pearson |
| hsa.mir.320b.1    | -0.189543834 | 0.261182479 | 0.893634813 | copeptin | pearson |
| hsa.mir.182.5p    | -0.08702335  | 0.593378841 | 0.935167048 | copeptin | pearson |
| hsa.mir.106a.5p   | 0.052620784  | 0.74709409  | 0.966407403 | copeptin | pearson |
| hsa.mir.224.5p    | 0.013779081  | 0.932748697 | 0.97904585  | copeptin | pearson |
| hsa.mir.127.3p    | -0.068647696 | 0.699670868 | 0.966407403 | copeptin | pearson |
| hsa.mir.142.3p    | -0.063542308 | 0.700756425 | 0.966407403 | copeptin | pearson |
| hsa.mir.379.5p    | -0.082101816 | 0.634052403 | 0.935411011 | copeptin | pearson |
| hsa.mir.151a.5p   | -0.174045189 | 0.282788045 | 0.893634813 | copeptin | pearson |
| hsa.mir.20b.5p    | 0.037182649  | 0.819813121 | 0.977919937 | copeptin | pearson |
| hsa.mir.7.1.5p    | -0.014860801 | 0.927482635 | 0.97904585  | copeptin | pearson |
| hsa.let.7c.5p     | -0.296820261 | 0.093464419 | 0.893634813 | copeptin | pearson |
| hsa.mir.660.5p    | 0.040985992  | 0.804340417 | 0.968587664 | copeptin | pearson |
| hsa.mir.194.1.5p  | 0.05150348   | 0.752293188 | 0.966407403 | copeptin | pearson |
| hsa.mir.15b.5p    | -0.077214395 | 0.635807044 | 0.935411011 | copeptin | pearson |
| hsa.mir.28.5p     | -0.093579168 | 0.565736458 | 0.935167048 | copeptin | pearson |
| hsa.mir.142.5p    | -0.017858804 | 0.912904272 | 0.97904585  | copeptin | pearson |
| hsa.mir.28.3p     | -0.112726658 | 0.488591447 | 0.935167048 | copeptin | pearson |
| hsa.mir.223.5p    | -0.034495991 | 0.851323055 | 0.97904585  | copeptin | pearson |
| hsa.mir.100.5p    | 0.14132886   | 0.390780901 | 0.935167048 | copeptin | pearson |
| hsa.mir.382.5p    | -0.070148527 | 0.693419088 | 0.966407403 | copeptin | pearson |
| hsa.mir.29a.3p    | 0.022893801  | 0.888486192 | 0.97904585  | copeptin | pearson |
| hsa.mir.155.5p    | -0.05255741  | 0.750665624 | 0.966407403 | copeptin | pearson |
| hsa.mir.152.3p    | -0.299105073 | 0.06435144  | 0.893634813 | copeptin | pearson |
| hsa.mir.30e.3p    | -0.20107608  | 0.219654326 | 0.893634813 | copeptin | pearson |
| hsa.mir.106b.5p   | 0.129057529  | 0.439980614 | 0.935167048 | copeptin | pearson |
| hsa.mir.1.1.3p    | 0.212400422  | 0.194234192 | 0.893634813 | copeptin | pearson |
| hsa.mir.139.5p    | -0.235793445 | 0.142990819 | 0.893634813 | copeptin | pearson |
| hsa.mir.652.3p    | -0.267873259 | 0.094691203 | 0.893634813 | copeptin | pearson |
| hsa.mir.98.5p     | -0.158584466 | 0.328383466 | 0.893634813 | copeptin | pearson |
| hsa.mir.181b.1.5p | -0.095268772 | 0.558709816 | 0.935167048 | copeptin | pearson |
| hsa.mir.629.5p    | 0.082521854  | 0.612695891 | 0.935411011 | copeptin | pearson |
| hsa.mir.374b.5p   | -0.263267668 | 0.100724298 | 0.893634813 | copeptin | pearson |
| hsa.mir.144.3p    | 0.092009838  | 0.572299172 | 0.935167048 | copeptin | pearson |
| hsa.mir.19b.1.3p  | -0.015745149 | 0.923179679 | 0.97904585  | copeptin | pearson |
| hsa.mir.223.3p    | -0.097439321 | 0.549743235 | 0.935167048 | copeptin | pearson |
| hsa.mir.363.3p    | 0.154461683  | 0.341273647 | 0.893634813 | copeptin | pearson |
| hsa.mir.361.5p    | -0.166675183 | 0.303981787 | 0.893634813 | copeptin | pearson |
| hsa.mir.107       | 0.041878821  | 0.797504129 | 0.968587664 | copeptin | pearson |
| hsa.mir.99b.5p    | -0.006900671 | 0.966291281 | 0.97958496  | copeptin | pearson |
| hsa.mir.125a.5p   | 0.022242264  | 0.8916407   | 0.97904585  | copeptin | pearson |
| hsa.mir.3615      | 0.083181182  | 0.609849921 | 0.935411011 | copeptin | pearson |
| hsa.mir.425.5p    | -0.242480028 | 0.131670013 | 0.893634813 | copeptin | pearson |
| hsa.mir.23a.3p    | -0.096787998 | 0.5524267   | 0.935167048 | copeptin | pearson |
| hsa.mir.192.5p    | 0.017414238  | 0.915064399 | 0.97904585  | copeptin | pearson |
| hsa.mir.140.5p    | -0.33612881  | 0.033956408 | 0.893634813 | copeptin | pearson |
| hsa.mir.106b.3p   | 0.106725247  | 0.512170411 | 0.935167048 | copeptin | pearson |
| hsa.mir.1307.3p   | -0.166040131 | 0.305854155 | 0.893634813 | copeptin | pearson |
| hsa.mir.150.5p    | 0.15825866   | 0.329390946 | 0.893634813 | copeptin | pearson |
| hsa.mir.340.5p    | -0.081176718 | 0.618519521 | 0.935411011 | copeptin | pearson |
| hsa.mir.30a.5p    | -0.029245447 | 0.857829809 | 0.97904585  | copeptin | pearson |

|                   |              |             |             |          |         |
|-------------------|--------------|-------------|-------------|----------|---------|
| hsa.mir.378a.3p   | 0.130312512  | 0.422865147 | 0.935167048 | copeptin | pearson |
| hsa.mir.584.5p    | -0.206128792 | 0.201923955 | 0.893634813 | copeptin | pearson |
| hsa.mir.744.5p    | -0.152403964 | 0.347821933 | 0.893634813 | copeptin | pearson |
| hsa.let.7d.5p     | -0.112948097 | 0.487732321 | 0.935167048 | copeptin | pearson |
| hsa.mir.221.3p    | -0.156062726 | 0.336231417 | 0.893634813 | copeptin | pearson |
| hsa.mir.140.3p    | -0.01226112  | 0.944268552 | 0.97904585  | copeptin | pearson |
| hsa.mir.10b.5p    | 0.158667337  | 0.328127513 | 0.893634813 | copeptin | pearson |
| hsa.mir.10a.5p    | -0.111196865 | 0.494547991 | 0.935167048 | copeptin | pearson |
| hsa.mir.30c.1.5p  | -0.198664801 | 0.219102557 | 0.893634813 | copeptin | pearson |
| hsa.mir.199a.1.5p | -0.170948055 | 0.291574223 | 0.893634813 | copeptin | pearson |
| hsa.mir.328.3p    | -0.195801568 | 0.232242569 | 0.893634813 | copeptin | pearson |
| hsa.mir.186.5p    | -0.121008425 | 0.457000015 | 0.935167048 | copeptin | pearson |
| hsa.mir.148b.3p   | -0.154567492 | 0.340938992 | 0.893634813 | copeptin | pearson |
| hsa.let.7d.3p     | -0.189848142 | 0.240659952 | 0.893634813 | copeptin | pearson |
| hsa.mir.146b.5p   | -0.097724134 | 0.548571742 | 0.935167048 | copeptin | pearson |
| hsa.mir.143.3p    | 0.153503648  | 0.344312923 | 0.893634813 | copeptin | pearson |
| hsa.mir.199a.1.3p | -0.223777645 | 0.165109306 | 0.893634813 | copeptin | pearson |
| hsa.mir.222.3p    | 0.01740854   | 0.915092093 | 0.97904585  | copeptin | pearson |
| hsa.mir.27b.3p    | -0.044957293 | 0.782964482 | 0.968587664 | copeptin | pearson |
| hsa.mir.16.1.5p   | 0.044849312  | 0.783473278 | 0.968587664 | copeptin | pearson |
| hsa.mir.532.5p    | 0.074999186  | 0.645556396 | 0.935411011 | copeptin | pearson |
| hsa.mir.17.5p     | -0.201391459 | 0.212714066 | 0.893634813 | copeptin | pearson |
| hsa.mir.484       | -0.236807969 | 0.141228538 | 0.893634813 | copeptin | pearson |
| hsa.mir.15a.5p    | 0.096821843  | 0.552287108 | 0.935167048 | copeptin | pearson |
| hsa.mir.181a.1.5p | -0.297179245 | 0.062568327 | 0.893634813 | copeptin | pearson |
| hsa.mir.101.1.3p  | 0.021524275  | 0.895118848 | 0.97904585  | copeptin | pearson |
| hsa.mir.99a.5p    | 0.052507464  | 0.747620895 | 0.966407403 | copeptin | pearson |
| hsa.mir.25.3p     | -0.000721211 | 0.996476    | 0.996476    | copeptin | pearson |
| hsa.mir.93.5p     | -0.140930158 | 0.385724238 | 0.935167048 | copeptin | pearson |
| hsa.mir.122.5p    | 0.051825486  | 0.750793697 | 0.966407403 | copeptin | pearson |
| hsa.mir.423.5p    | -0.333685129 | 0.035359335 | 0.893634813 | copeptin | pearson |
| hsa.mir.320a      | -0.109966738 | 0.49936461  | 0.935167048 | copeptin | pearson |
| hsa.mir.185.5p    | -0.055579254 | 0.733381366 | 0.966407403 | copeptin | pearson |
| hsa.mir.126.5p    | -0.254723114 | 0.112690296 | 0.893634813 | copeptin | pearson |
| hsa.mir.27a.3p    | 0.100370067  | 0.537745398 | 0.935167048 | copeptin | pearson |
| hsa.mir.146a.5p   | -0.195407245 | 0.226906762 | 0.893634813 | copeptin | pearson |
| hsa.let.7a.1.5p   | -0.163777473 | 0.312584834 | 0.893634813 | copeptin | pearson |
| hsa.mir.24.1.3p   | -0.182918489 | 0.258578446 | 0.893634813 | copeptin | pearson |
| hsa.mir.128.1.3p  | -0.190811051 | 0.238238258 | 0.893634813 | copeptin | pearson |
| hsa.mir.26b.5p    | -0.015546656 | 0.9241453   | 0.97904585  | copeptin | pearson |
| hsa.mir.20a.5p    | -0.085665174 | 0.599178887 | 0.935167048 | copeptin | pearson |
| hsa.let.7b.5p     | 0.062246983  | 0.702779482 | 0.966407403 | copeptin | pearson |
| hsa.mir.151a.3p   | -0.202458414 | 0.210249723 | 0.893634813 | copeptin | pearson |
| hsa.mir.103a.1.3p | -0.237650521 | 0.139777201 | 0.893634813 | copeptin | pearson |
| hsa.mir.423.3p    | -0.284631182 | 0.075058469 | 0.893634813 | copeptin | pearson |
| hsa.mir.486.1.5p  | 0.106834873  | 0.511734654 | 0.935167048 | copeptin | pearson |
| hsa.mir.148a.3p   | -0.010293977 | 0.9497331   | 0.97904585  | copeptin | pearson |
| hsa.let.7f.1.5p   | -0.086957178 | 0.593660856 | 0.935167048 | copeptin | pearson |
| hsa.mir.191.5p    | -0.279054117 | 0.081201761 | 0.893634813 | copeptin | pearson |
| hsa.mir.30e.5p    | -0.193677323 | 0.231127604 | 0.893634813 | copeptin | pearson |
| hsa.mir.486.2.5p  | 0.006954463  | 0.966028669 | 0.97958496  | copeptin | pearson |
| hsa.mir.92a.1.3p  | 0.049117273  | 0.763432747 | 0.968587664 | copeptin | pearson |
| hsa.let.7i.5p     | -0.124260987 | 0.444901344 | 0.935167048 | copeptin | pearson |
| hsa.mir.30d.5p    | -0.324764528 | 0.040889128 | 0.893634813 | copeptin | pearson |
| hsa.mir.22.3p     | -0.22537538  | 0.162033712 | 0.893634813 | copeptin | pearson |
| hsa.mir.126.3p    | -0.114961646 | 0.479956296 | 0.935167048 | copeptin | pearson |

|                   |              |             |             |          |         |
|-------------------|--------------|-------------|-------------|----------|---------|
| hsa.mir.21.5p     | -0.058389572 | 0.720430464 | 0.966407403 | copeptin | pearson |
| hsa.let.7g.5p     | -0.265814994 | 0.097352124 | 0.893634813 | copeptin | pearson |
| hsa.mir.451a      | 0.191993998  | 0.235285849 | 0.893634813 | copeptin | pearson |
| hsa.mir.26a.1.5p  | -0.14239545  | 0.380753475 | 0.935167048 | copeptin | pearson |
| hsa.mir.369.5p    | -0.008700254 | 0.960438794 | 0.979778435 | cpeptide | pearson |
| hsa.mir.411.3p    | -0.027548382 | 0.88304723  | 0.979778435 | cpeptide | pearson |
| hsa.mir.29b.1.3p  | 0.154466707  | 0.398605645 | 0.977281128 | cpeptide | pearson |
| hsa.mir.29b.2.3p  | 0.131674717  | 0.480132252 | 0.977281128 | cpeptide | pearson |
| hsa.mir.941.1     | -0.089152022 | 0.639433041 | 0.977281128 | cpeptide | pearson |
| hsa.mir.654.5p    | 0.144670176  | 0.414317443 | 0.977281128 | cpeptide | pearson |
| hsa.mir.411.5p    | 0.020471721  | 0.908511262 | 0.979778435 | cpeptide | pearson |
| hsa.mir.181a.1.3p | 0.164116758  | 0.386157774 | 0.977281128 | cpeptide | pearson |
| hsa.mir.1307.5p   | 0.106585328  | 0.554947234 | 0.977281128 | cpeptide | pearson |
| hsa.mir.493.3p    | 0.080157722  | 0.632372566 | 0.977281128 | cpeptide | pearson |
| hsa.mir.26b.3p    | 0.095442194  | 0.609539664 | 0.977281128 | cpeptide | pearson |
| hsa.mir.22.5p     | 0.039419739  | 0.833244623 | 0.979778435 | cpeptide | pearson |
| hsa.mir.21.3p     | 0.055717321  | 0.769953224 | 0.979778435 | cpeptide | pearson |
| hsa.mir.501.3p    | 0.051498989  | 0.779540844 | 0.979778435 | cpeptide | pearson |
| hsa.mir.454.3p    | 0.038440212  | 0.83180593  | 0.979778435 | cpeptide | pearson |
| hsa.mir.486.1.3p  | -0.016759349 | 0.920449658 | 0.979778435 | cpeptide | pearson |
| hsa.mir.323a.3p   | -0.068374231 | 0.7195887   | 0.979778435 | cpeptide | pearson |
| hsa.mir.144.5p    | -0.088438644 | 0.597501162 | 0.977281128 | cpeptide | pearson |
| hsa.mir.374a.5p   | 0.042410911  | 0.803180419 | 0.979778435 | cpeptide | pearson |
| hsa.mir.148a.5p   | 0.245092116  | 0.162389633 | 0.799034712 | cpeptide | pearson |
| hsa.mir.495.3p    | -0.007168408 | 0.965930009 | 0.979778435 | cpeptide | pearson |
| hsa.mir.493.5p    | -0.005488568 | 0.973910803 | 0.979778435 | cpeptide | pearson |
| hsa.mir.432.5p    | 0.088265006  | 0.642782462 | 0.977281128 | cpeptide | pearson |
| hsa.mir.425.3p    | 0.151571124  | 0.38474963  | 0.977281128 | cpeptide | pearson |
| hsa.mir.424.3p    | 0.158370105  | 0.40323122  | 0.977281128 | cpeptide | pearson |
| hsa.mir.485.3p    | 0.126024971  | 0.457336402 | 0.977281128 | cpeptide | pearson |
| hsa.mir.369.3p    | -0.1026849   | 0.557213985 | 0.977281128 | cpeptide | pearson |
| hsa.mir.330.3p    | -0.123190251 | 0.467598653 | 0.977281128 | cpeptide | pearson |
| hsa.mir.339.5p    | 0.027041308  | 0.870196974 | 0.979778435 | cpeptide | pearson |
| hsa.mir.4433b.5p  | -0.159433774 | 0.3323011   | 0.977281128 | cpeptide | pearson |
| hsa.mir.23b.3p    | -0.33651968  | 0.041696243 | 0.580272715 | cpeptide | pearson |
| hsa.mir.1180.3p   | 0.094473912  | 0.578084396 | 0.977281128 | cpeptide | pearson |
| hsa.mir.654.3p    | 0.033821686  | 0.838038835 | 0.979778435 | cpeptide | pearson |
| hsa.mir.409.3p    | -0.084623095 | 0.608512907 | 0.977281128 | cpeptide | pearson |
| hsa.mir.181d.5p   | -0.01544904  | 0.930895533 | 0.979778435 | cpeptide | pearson |
| hsa.mir.19a.3p    | 0.021786546  | 0.904211814 | 0.979778435 | cpeptide | pearson |
| hsa.mir.421       | -0.020830575 | 0.908396889 | 0.979778435 | cpeptide | pearson |
| hsa.mir.339.3p    | 0.016037929  | 0.926032756 | 0.979778435 | cpeptide | pearson |
| hsa.mir.342.3p    | -0.006632852 | 0.968920957 | 0.979778435 | cpeptide | pearson |
| hsa.mir.183.5p    | 0.069115104  | 0.680108255 | 0.979778435 | cpeptide | pearson |
| hsa.mir.340.3p    | -0.050773798 | 0.758870861 | 0.979778435 | cpeptide | pearson |
| hsa.mir.381.3p    | 0.204151295  | 0.212535703 | 0.825429357 | cpeptide | pearson |
| hsa.mir.370.3p    | 0.085545166  | 0.614672071 | 0.977281128 | cpeptide | pearson |
| hsa.mir.335.5p    | 0.035212014  | 0.8360888   | 0.979778435 | cpeptide | pearson |
| hsa.mir.134.5p    | 0.043751255  | 0.7970882   | 0.979778435 | cpeptide | pearson |
| hsa.mir.494.3p    | 0.213802047  | 0.256601085 | 0.892757943 | cpeptide | pearson |
| hsa.mir.125b.1.5p | 0.091036154  | 0.576388342 | 0.977281128 | cpeptide | pearson |
| hsa.mir.130a.3p   | -0.078103545 | 0.641149369 | 0.977281128 | cpeptide | pearson |
| hsa.let.7e.5p     | -0.088578392 | 0.591799503 | 0.977281128 | cpeptide | pearson |
| hsa.mir.543       | -0.269716715 | 0.092355795 | 0.684807288 | cpeptide | pearson |
| hsa.mir.30b.5p    | -0.211794913 | 0.201772645 | 0.821854432 | cpeptide | pearson |
| hsa.mir.625.3p    | -0.437978211 | 0.005956865 | 0.506656    | cpeptide | pearson |

|                   |              |             |             |          |         |
|-------------------|--------------|-------------|-------------|----------|---------|
| hsa.mir.335.3p    | -0.389501405 | 0.017177408 | 0.506656    | cpeptide | pearson |
| hsa.mir.197.3p    | 0.037109662  | 0.824941653 | 0.979778435 | cpeptide | pearson |
| hsa.mir.130b.5p   | -0.271274511 | 0.104358531 | 0.684807288 | cpeptide | pearson |
| hsa.mir.375       | 0.112860769  | 0.488071038 | 0.977281128 | cpeptide | pearson |
| hsa.mir.18a.5p    | 0.144070915  | 0.381559005 | 0.977281128 | cpeptide | pearson |
| hsa.mir.320b.1    | 0.160269332  | 0.343351236 | 0.977281128 | cpeptide | pearson |
| hsa.mir.182.5p    | 0.049669661  | 0.760849751 | 0.979778435 | cpeptide | pearson |
| hsa.mir.106a.5p   | -0.031506788 | 0.846962513 | 0.979778435 | cpeptide | pearson |
| hsa.mir.224.5p    | 0.025789242  | 0.874488673 | 0.979778435 | cpeptide | pearson |
| hsa.mir.127.3p    | 0.013174416  | 0.941050888 | 0.979778435 | cpeptide | pearson |
| hsa.mir.142.3p    | 0.212706147  | 0.193577935 | 0.821854432 | cpeptide | pearson |
| hsa.mir.379.5p    | -0.075748055 | 0.66060326  | 0.979778435 | cpeptide | pearson |
| hsa.mir.151a.5p   | -0.203902917 | 0.206945063 | 0.822852989 | cpeptide | pearson |
| hsa.mir.20b.5p    | 0.026101649  | 0.872980566 | 0.979778435 | cpeptide | pearson |
| hsa.mir.7.1.5p    | 0.008043103  | 0.960714701 | 0.979778435 | cpeptide | pearson |
| hsa.let.7c.5p     | -0.231854045 | 0.194177383 | 0.821854432 | cpeptide | pearson |
| hsa.mir.660.5p    | -0.081861721 | 0.62029931  | 0.977281128 | cpeptide | pearson |
| hsa.mir.194.1.5p  | 0.21380712   | 0.185259204 | 0.821854432 | cpeptide | pearson |
| hsa.mir.15b.5p    | -0.150666681 | 0.35340977  | 0.977281128 | cpeptide | pearson |
| hsa.mir.28.5p     | -0.091902869 | 0.572747762 | 0.977281128 | cpeptide | pearson |
| hsa.mir.142.5p    | -0.064921961 | 0.690628206 | 0.979778435 | cpeptide | pearson |
| hsa.mir.28.3p     | -0.207857652 | 0.198083284 | 0.821854432 | cpeptide | pearson |
| hsa.mir.223.5p    | -0.277054229 | 0.124752071 | 0.684807288 | cpeptide | pearson |
| hsa.mir.100.5p    | 0.067490441  | 0.683104295 | 0.979778435 | cpeptide | pearson |
| hsa.mir.382.5p    | -0.124029315 | 0.484637266 | 0.977281128 | cpeptide | pearson |
| hsa.mir.29a.3p    | 0.117397582  | 0.470636538 | 0.977281128 | cpeptide | pearson |
| hsa.mir.155.5p    | -0.089146884 | 0.589414014 | 0.977281128 | cpeptide | pearson |
| hsa.mir.152.3p    | -0.38827481  | 0.01458311  | 0.506656    | cpeptide | pearson |
| hsa.mir.30e.3p    | -0.148533942 | 0.366826051 | 0.977281128 | cpeptide | pearson |
| hsa.mir.106b.5p   | -0.009047009 | 0.957008819 | 0.979778435 | cpeptide | pearson |
| hsa.mir.1.1.3p    | 0.114253091  | 0.488580044 | 0.977281128 | cpeptide | pearson |
| hsa.mir.139.5p    | -0.078867176 | 0.628572131 | 0.977281128 | cpeptide | pearson |
| hsa.mir.652.3p    | -0.119024954 | 0.464464164 | 0.977281128 | cpeptide | pearson |
| hsa.mir.98.5p     | -0.278553765 | 0.081771509 | 0.684807288 | cpeptide | pearson |
| hsa.mir.181b.1.5p | 0.087841473  | 0.589897035 | 0.977281128 | cpeptide | pearson |
| hsa.mir.629.5p    | 0.095662198  | 0.557079518 | 0.977281128 | cpeptide | pearson |
| hsa.mir.374b.5p   | -0.06566309  | 0.687274916 | 0.979778435 | cpeptide | pearson |
| hsa.mir.144.3p    | 0.082494166  | 0.61281553  | 0.977281128 | cpeptide | pearson |
| hsa.mir.19b.1.3p  | 0.044017656  | 0.787394931 | 0.979778435 | cpeptide | pearson |
| hsa.mir.223.3p    | -0.175063885 | 0.279936186 | 0.926421284 | cpeptide | pearson |
| hsa.mir.363.3p    | 0.008121368  | 0.960332729 | 0.979778435 | cpeptide | pearson |
| hsa.mir.361.5p    | -0.240188528 | 0.135471948 | 0.706994227 | cpeptide | pearson |
| hsa.mir.107       | -0.065712227 | 0.687052799 | 0.979778435 | cpeptide | pearson |
| hsa.mir.99b.5p    | -0.125564236 | 0.440103283 | 0.977281128 | cpeptide | pearson |
| hsa.mir.125a.5p   | -0.103629779 | 0.524550909 | 0.977281128 | cpeptide | pearson |
| hsa.mir.3615      | 0.190475506  | 0.239080265 | 0.891419372 | cpeptide | pearson |
| hsa.mir.425.5p    | 0.023848766  | 0.883865673 | 0.979778435 | cpeptide | pearson |
| hsa.mir.23a.3p    | -0.219612474 | 0.173324989 | 0.821854432 | cpeptide | pearson |
| hsa.mir.192.5p    | 0.126376575  | 0.437127042 | 0.977281128 | cpeptide | pearson |
| hsa.mir.140.5p    | -0.050312848 | 0.757845399 | 0.979778435 | cpeptide | pearson |
| hsa.mir.106b.3p   | -0.075415844 | 0.643718108 | 0.977281128 | cpeptide | pearson |
| hsa.mir.1307.3p   | -0.145960872 | 0.368817169 | 0.977281128 | cpeptide | pearson |
| hsa.mir.150.5p    | 0.298101079  | 0.061720162 | 0.684807288 | cpeptide | pearson |
| hsa.mir.340.5p    | -0.323849992 | 0.041493719 | 0.580272715 | cpeptide | pearson |
| hsa.mir.30a.5p    | -0.0256544   | 0.875139738 | 0.979778435 | cpeptide | pearson |
| hsa.mir.378a.3p   | 0.187553178  | 0.246498664 | 0.892757943 | cpeptide | pearson |

|                   |              |             |             |          |         |
|-------------------|--------------|-------------|-------------|----------|---------|
| hsa.mir.584.5p    | -0.253577725 | 0.114372757 | 0.684807288 | cpeptide | pearson |
| hsa.mir.744.5p    | -0.280472959 | 0.079602944 | 0.684807288 | cpeptide | pearson |
| hsa.let.7d.5p     | -0.266219915 | 0.096824161 | 0.684807288 | cpeptide | pearson |
| hsa.mir.221.3p    | -0.266502787 | 0.09645664  | 0.684807288 | cpeptide | pearson |
| hsa.mir.140.3p    | -0.038403353 | 0.826629218 | 0.979778435 | cpeptide | pearson |
| hsa.mir.10b.5p    | 0.091729699  | 0.573474311 | 0.977281128 | cpeptide | pearson |
| hsa.mir.10a.5p    | -0.245288112 | 0.127119916 | 0.684807288 | cpeptide | pearson |
| hsa.mir.30c.1.5p  | -0.114546646 | 0.481553633 | 0.977281128 | cpeptide | pearson |
| hsa.mir.199a.1.5p | -0.076193076 | 0.640294571 | 0.977281128 | cpeptide | pearson |
| hsa.mir.328.3p    | -0.179376073 | 0.274548006 | 0.926421284 | cpeptide | pearson |
| hsa.mir.186.5p    | -0.070538534 | 0.665365171 | 0.979778435 | cpeptide | pearson |
| hsa.mir.148b.3p   | -0.309024368 | 0.052349094 | 0.624449902 | cpeptide | pearson |
| hsa.let.7d.3p     | -0.255223442 | 0.111961269 | 0.684807288 | cpeptide | pearson |
| hsa.mir.146b.5p   | -0.371678987 | 0.01820321  | 0.506656    | cpeptide | pearson |
| hsa.mir.143.3p    | -0.162716676 | 0.315772354 | 0.977281128 | cpeptide | pearson |
| hsa.mir.199a.1.3p | -0.269370742 | 0.092790677 | 0.684807288 | cpeptide | pearson |
| hsa.mir.222.3p    | -3.27E-05    | 0.99984003  | 0.99984003  | cpeptide | pearson |
| hsa.mir.27b.3p    | -0.116424891 | 0.474346454 | 0.977281128 | cpeptide | pearson |
| hsa.mir.16.1.5p   | -0.005340088 | 0.973911498 | 0.979778435 | cpeptide | pearson |
| hsa.mir.532.5p    | 0.057836     | 0.72297556  | 0.979778435 | cpeptide | pearson |
| hsa.mir.17.5p     | -0.02965921  | 0.855839397 | 0.979778435 | cpeptide | pearson |
| hsa.mir.484       | -0.119510681 | 0.462630291 | 0.977281128 | cpeptide | pearson |
| hsa.mir.15a.5p    | 0.041001119  | 0.801662144 | 0.979778435 | cpeptide | pearson |
| hsa.mir.181a.1.5p | -0.248940192 | 0.121379245 | 0.684807288 | cpeptide | pearson |
| hsa.mir.101.1.3p  | -0.013911057 | 0.932106053 | 0.979778435 | cpeptide | pearson |
| hsa.mir.99a.5p    | 0.03900151   | 0.811155047 | 0.979778435 | cpeptide | pearson |
| hsa.mir.25.3p     | -0.075865669 | 0.641735839 | 0.977281128 | cpeptide | pearson |
| hsa.mir.93.5p     | 0.033110875  | 0.839270559 | 0.979778435 | cpeptide | pearson |
| hsa.mir.122.5p    | 0.154186289  | 0.342145614 | 0.977281128 | cpeptide | pearson |
| hsa.mir.423.5p    | -0.080559943 | 0.621197522 | 0.977281128 | cpeptide | pearson |
| hsa.mir.320a      | -0.098727297 | 0.544454974 | 0.977281128 | cpeptide | pearson |
| hsa.mir.185.5p    | -0.076529016 | 0.638817097 | 0.977281128 | cpeptide | pearson |
| hsa.mir.126.5p    | -0.123434064 | 0.447960541 | 0.977281128 | cpeptide | pearson |
| hsa.mir.27a.3p    | 0.093573954  | 0.565758207 | 0.977281128 | cpeptide | pearson |
| hsa.mir.146a.5p   | -0.184917732 | 0.253320232 | 0.892757943 | cpeptide | pearson |
| hsa.let.7a.1.5p   | -0.344607445 | 0.029438401 | 0.580272715 | cpeptide | pearson |
| hsa.mir.24.1.3p   | -0.111952234 | 0.491602167 | 0.977281128 | cpeptide | pearson |
| hsa.mir.128.1.3p  | -0.340448718 | 0.031588165 | 0.580272715 | cpeptide | pearson |
| hsa.mir.26b.5p    | -0.030243897 | 0.853028261 | 0.979778435 | cpeptide | pearson |
| hsa.mir.20a.5p    | -0.059358596 | 0.715982452 | 0.979778435 | cpeptide | pearson |
| hsa.let.7b.5p     | -0.027595107 | 0.865777299 | 0.979778435 | cpeptide | pearson |
| hsa.mir.151a.3p   | -0.388368044 | 0.013270095 | 0.506656    | cpeptide | pearson |
| hsa.mir.103a.1.3p | -0.253231275 | 0.114885376 | 0.684807288 | cpeptide | pearson |
| hsa.mir.423.3p    | -0.254619414 | 0.112841846 | 0.684807288 | cpeptide | pearson |
| hsa.mir.486.1.5p  | -0.025204017 | 0.877314941 | 0.979778435 | cpeptide | pearson |
| hsa.mir.148a.3p   | 0.087173412  | 0.592739526 | 0.977281128 | cpeptide | pearson |
| hsa.let.7f.1.5p   | -0.362784929 | 0.021408684 | 0.510750025 | cpeptide | pearson |
| hsa.mir.191.5p    | -0.245943901 | 0.126074428 | 0.684807288 | cpeptide | pearson |
| hsa.mir.30e.5p    | -0.173998545 | 0.282919075 | 0.926421284 | cpeptide | pearson |
| hsa.mir.486.2.5p  | -0.050592082 | 0.756542175 | 0.979778435 | cpeptide | pearson |
| hsa.mir.92a.1.3p  | 0.1900294    | 0.240202825 | 0.891419372 | cpeptide | pearson |
| hsa.let.7i.5p     | -0.392478088 | 0.012246692 | 0.506656    | cpeptide | pearson |
| hsa.mir.30d.5p    | -0.324675817 | 0.040947458 | 0.580272715 | cpeptide | pearson |
| hsa.mir.22.3p     | 0.104263529  | 0.522004266 | 0.977281128 | cpeptide | pearson |
| hsa.mir.126.3p    | -0.225039017 | 0.162677726 | 0.799034712 | cpeptide | pearson |
| hsa.mir.21.5p     | -0.26142504  | 0.103218747 | 0.684807288 | cpeptide | pearson |

|                   |              |             |             |          |         |
|-------------------|--------------|-------------|-------------|----------|---------|
| hsa.let.7g.5p     | -0.213739743 | 0.185401052 | 0.821854432 | cpeptide | pearson |
| hsa.mir.451a      | 0.017531417  | 0.914494975 | 0.979778435 | cpeptide | pearson |
| hsa.mir.26a.1.5p  | -0.317606389 | 0.045818051 | 0.58858573  | cpeptide | pearson |
| hsa.mir.369.5p    | -0.045746778 | 0.794131728 | 0.961014482 | norepi   | pearson |
| hsa.mir.411.3p    | -0.045360928 | 0.808544    | 0.964477486 | norepi   | pearson |
| hsa.mir.29b.1.3p  | -0.269570833 | 0.135690936 | 0.587528341 | norepi   | pearson |
| hsa.mir.29b.2.3p  | -0.192878757 | 0.298537792 | 0.772034446 | norepi   | pearson |
| hsa.mir.941.1     | -0.17278531  | 0.361208584 | 0.781903033 | norepi   | pearson |
| hsa.mir.654.5p    | 0.006599585  | 0.970450869 | 0.987559367 | norepi   | pearson |
| hsa.mir.411.5p    | -0.169517271 | 0.337843153 | 0.781903033 | norepi   | pearson |
| hsa.mir.181a.1.3p | -0.020455216 | 0.914560368 | 0.983741977 | norepi   | pearson |
| hsa.mir.1307.5p   | 0.013057242  | 0.942507283 | 0.983741977 | norepi   | pearson |
| hsa.mir.493.3p    | 0.098619959  | 0.555817606 | 0.915572391 | norepi   | pearson |
| hsa.mir.26b.3p    | -0.033684835 | 0.857236703 | 0.97497815  | norepi   | pearson |
| hsa.mir.22.5p     | 0.255856774  | 0.164753652 | 0.681957551 | norepi   | pearson |
| hsa.mir.21.3p     | 0.247171864  | 0.187894843 | 0.703474308 | norepi   | pearson |
| hsa.mir.501.3p    | -0.056723391 | 0.757809971 | 0.946599184 | norepi   | pearson |
| hsa.mir.454.3p    | 0.058180701  | 0.747749553 | 0.946599184 | norepi   | pearson |
| hsa.mir.486.1.3p  | -0.029975333 | 0.8582143   | 0.97497815  | norepi   | pearson |
| hsa.mir.323a.3p   | 0.081097099  | 0.670096323 | 0.918867489 | norepi   | pearson |
| hsa.mir.144.5p    | 0.119246285  | 0.475797206 | 0.856823132 | norepi   | pearson |
| hsa.mir.374a.5p   | 0.216457165  | 0.198169063 | 0.703474308 | norepi   | pearson |
| hsa.mir.148a.5p   | -0.222929753 | 0.205051285 | 0.703474308 | norepi   | pearson |
| hsa.mir.495.3p    | -0.097778154 | 0.559211879 | 0.915572391 | norepi   | pearson |
| hsa.mir.493.5p    | 0.079898453  | 0.633477633 | 0.918867489 | norepi   | pearson |
| hsa.mir.432.5p    | 0.015078857  | 0.936964828 | 0.983741977 | norepi   | pearson |
| hsa.mir.425.3p    | 0.128960571  | 0.460317276 | 0.853770722 | norepi   | pearson |
| hsa.mir.424.3p    | 0.332882247  | 0.072263379 | 0.587528341 | norepi   | pearson |
| hsa.mir.485.3p    | -0.228335061 | 0.174060154 | 0.692096329 | norepi   | pearson |
| hsa.mir.369.3p    | 0.004881337  | 0.977797966 | 0.987559367 | norepi   | pearson |
| hsa.mir.330.3p    | -0.022206883 | 0.896203388 | 0.983741977 | norepi   | pearson |
| hsa.mir.339.5p    | 0.225537757  | 0.167426704 | 0.681957551 | norepi   | pearson |
| hsa.mir.4433b.5p  | 0.01958906   | 0.905778703 | 0.983741977 | norepi   | pearson |
| hsa.mir.23b.3p    | 0.078646328  | 0.64358995  | 0.918867489 | norepi   | pearson |
| hsa.mir.1180.3p   | -0.138501452 | 0.413638928 | 0.803229082 | norepi   | pearson |
| hsa.mir.654.3p    | -0.049459576 | 0.764933492 | 0.946599184 | norepi   | pearson |
| hsa.mir.409.3p    | -0.038305984 | 0.816908912 | 0.966585229 | norepi   | pearson |
| hsa.mir.181d.5p   | -0.137236783 | 0.438953197 | 0.842588321 | norepi   | pearson |
| hsa.mir.19a.3p    | -0.035270342 | 0.845502001 | 0.97497815  | norepi   | pearson |
| hsa.mir.421       | 0.035749309  | 0.843429578 | 0.97497815  | norepi   | pearson |
| hsa.mir.339.3p    | 0.177451264  | 0.300492449 | 0.772034446 | norepi   | pearson |
| hsa.mir.342.3p    | -0.210716666 | 0.21062105  | 0.703474308 | norepi   | pearson |
| hsa.mir.183.5p    | -0.045743419 | 0.785080406 | 0.956995824 | norepi   | pearson |
| hsa.mir.340.3p    | 0.257175288  | 0.113987765 | 0.587528341 | norepi   | pearson |
| hsa.mir.381.3p    | -0.12302098  | 0.455600425 | 0.853770722 | norepi   | pearson |
| hsa.mir.370.3p    | -0.084844729 | 0.617583061 | 0.918867489 | norepi   | pearson |
| hsa.mir.335.5p    | 0.015682361  | 0.926599897 | 0.983741977 | norepi   | pearson |
| hsa.mir.134.5p    | -0.096542293 | 0.569750738 | 0.916595269 | norepi   | pearson |
| hsa.mir.494.3p    | -0.076515784 | 0.687775067 | 0.918867489 | norepi   | pearson |
| hsa.mir.125b.1.5p | -0.108804304 | 0.503938053 | 0.85875158  | norepi   | pearson |
| hsa.mir.130a.3p   | -0.153427964 | 0.35775017  | 0.781903033 | norepi   | pearson |
| hsa.let.7e.5p     | 0.26279353   | 0.106029051 | 0.587528341 | norepi   | pearson |
| hsa.mir.543       | 0.092277816  | 0.571176074 | 0.916595269 | norepi   | pearson |
| hsa.mir.30b.5p    | 0.092271607  | 0.581649274 | 0.916595269 | norepi   | pearson |
| hsa.mir.625.3p    | 0.14114327   | 0.397974597 | 0.781903033 | norepi   | pearson |
| hsa.mir.335.3p    | 0.123842024  | 0.465228358 | 0.853770722 | norepi   | pearson |

|                   |              |             |             |        |         |
|-------------------|--------------|-------------|-------------|--------|---------|
| hsa.mir.197.3p    | 0.030403035  | 0.856212204 | 0.97497815  | norepi | pearson |
| hsa.mir.130b.5p   | 0.144606852  | 0.393149319 | 0.781903033 | norepi | pearson |
| hsa.mir.375       | 0.00880274   | 0.957007669 | 0.987559367 | norepi | pearson |
| hsa.mir.18a.5p    | 0.079546072  | 0.630255984 | 0.918867489 | norepi | pearson |
| hsa.mir.320b.1    | 0.041582596  | 0.806951083 | 0.964477486 | norepi | pearson |
| hsa.mir.182.5p    | -0.016130946 | 0.921303186 | 0.983741977 | norepi | pearson |
| hsa.mir.106a.5p   | -0.113301512 | 0.486362782 | 0.85875158  | norepi | pearson |
| hsa.mir.224.5p    | -0.068610296 | 0.673998959 | 0.918867489 | norepi | pearson |
| hsa.mir.127.3p    | 0.110790887  | 0.532773662 | 0.889732016 | norepi | pearson |
| hsa.mir.142.3p    | -0.150344096 | 0.360948843 | 0.781903033 | norepi | pearson |
| hsa.mir.379.5p    | -0.003974519 | 0.981645837 | 0.987559367 | norepi | pearson |
| hsa.mir.151a.5p   | 0.208874052  | 0.195849438 | 0.703474308 | norepi | pearson |
| hsa.mir.20b.5p    | -0.080959733 | 0.619461102 | 0.918867489 | norepi | pearson |
| hsa.mir.7.1.5p    | -0.079269929 | 0.626814259 | 0.918867489 | norepi | pearson |
| hsa.let.7c.5p     | 0.040742894  | 0.821886842 | 0.966585229 | norepi | pearson |
| hsa.mir.660.5p    | -0.140360203 | 0.394069381 | 0.781903033 | norepi | pearson |
| hsa.mir.194.1.5p  | -0.275631808 | 0.085161121 | 0.587528341 | norepi | pearson |
| hsa.mir.15b.5p    | 0.158601489  | 0.328330879 | 0.781903033 | norepi | pearson |
| hsa.mir.28.5p     | 0.185149359  | 0.252715684 | 0.742626021 | norepi | pearson |
| hsa.mir.142.5p    | 0.103718456  | 0.524194202 | 0.884246785 | norepi | pearson |
| hsa.mir.28.3p     | 0.142139983  | 0.381617375 | 0.781903033 | norepi | pearson |
| hsa.mir.223.5p    | 0.138746402  | 0.448860782 | 0.851815348 | norepi | pearson |
| hsa.mir.100.5p    | -0.317472497 | 0.048908346 | 0.548838148 | norepi | pearson |
| hsa.mir.382.5p    | 0.206802775  | 0.240598853 | 0.742626021 | norepi | pearson |
| hsa.mir.29a.3p    | -0.073856644 | 0.650607912 | 0.918867489 | norepi | pearson |
| hsa.mir.155.5p    | 0.111770782  | 0.498135874 | 0.85875158  | norepi | pearson |
| hsa.mir.152.3p    | 0.327806617  | 0.041627738 | 0.534756328 | norepi | pearson |
| hsa.mir.30e.3p    | 0.06427917   | 0.697449795 | 0.919906069 | norepi | pearson |
| hsa.mir.106b.5p   | -0.081029928 | 0.628660779 | 0.918867489 | norepi | pearson |
| hsa.mir.1.1.3p    | -0.437591675 | 0.005338727 | 0.534756328 | norepi | pearson |
| hsa.mir.139.5p    | 0.259113084  | 0.106414897 | 0.587528341 | norepi | pearson |
| hsa.mir.652.3p    | 0.153022453  | 0.345845704 | 0.781903033 | norepi | pearson |
| hsa.mir.98.5p     | 0.327113201  | 0.03936921  | 0.534756328 | norepi | pearson |
| hsa.mir.181b.1.5p | -0.066329868 | 0.684263064 | 0.918867489 | norepi | pearson |
| hsa.mir.629.5p    | -0.07402521  | 0.649861656 | 0.918867489 | norepi | pearson |
| hsa.mir.374b.5p   | 0.166049832  | 0.305825498 | 0.773831185 | norepi | pearson |
| hsa.mir.144.3p    | -0.067691003 | 0.67812978  | 0.918867489 | norepi | pearson |
| hsa.mir.19b.1.3p  | -0.062952083 | 0.699569286 | 0.919906069 | norepi | pearson |
| hsa.mir.223.3p    | 0.184859964  | 0.253471157 | 0.742626021 | norepi | pearson |
| hsa.mir.363.3p    | -0.145293827 | 0.371033136 | 0.781903033 | norepi | pearson |
| hsa.mir.361.5p    | 0.212843723  | 0.187294765 | 0.703474308 | norepi | pearson |
| hsa.mir.107       | 0.013564259  | 0.933794844 | 0.983741977 | norepi | pearson |
| hsa.mir.99b.5p    | 0.257988696  | 0.107996257 | 0.587528341 | norepi | pearson |
| hsa.mir.125a.5p   | -0.021224252 | 0.89657282  | 0.983741977 | norepi | pearson |
| hsa.mir.3615      | -0.140018177 | 0.388837094 | 0.781903033 | norepi | pearson |
| hsa.mir.425.5p    | 0.15397691   | 0.342809477 | 0.781903033 | norepi | pearson |
| hsa.mir.23a.3p    | 0.07007524   | 0.667435763 | 0.918867489 | norepi | pearson |
| hsa.mir.192.5p    | -0.176745644 | 0.27526926  | 0.751263822 | norepi | pearson |
| hsa.mir.140.5p    | 0.178951924  | 0.269224512 | 0.749341557 | norepi | pearson |
| hsa.mir.106b.3p   | -0.08280265  | 0.611483156 | 0.918867489 | norepi | pearson |
| hsa.mir.1307.3p   | 0.151734775  | 0.349967908 | 0.781903033 | norepi | pearson |
| hsa.mir.150.5p    | -0.362718678 | 0.021434224 | 0.534756328 | norepi | pearson |
| hsa.mir.340.5p    | 0.273760743  | 0.087388261 | 0.587528341 | norepi | pearson |
| hsa.mir.30a.5p    | -0.175431265 | 0.278912317 | 0.751263822 | norepi | pearson |
| hsa.mir.378a.3p   | -0.187340435 | 0.247044695 | 0.742626021 | norepi | pearson |
| hsa.mir.584.5p    | 0.376990624  | 0.01648877  | 0.534756328 | norepi | pearson |



|                   |              |             |             |        |         |
|-------------------|--------------|-------------|-------------|--------|---------|
| hsa.mir.744.5p    | 0.259139195  | 0.106378385 | 0.587528341 | norepi | pearson |
| hsa.let.7d.5p     | 0.346289576  | 0.028603877 | 0.534756328 | norepi | pearson |
| hsa.mir.221.3p    | 0.249373642  | 0.120711047 | 0.587528341 | norepi | pearson |
| hsa.mir.140.3p    | -0.004498797 | 0.979537511 | 0.987559367 | norepi | pearson |
| hsa.mir.10b.5p    | -0.138738124 | 0.393230967 | 0.781903033 | norepi | pearson |
| hsa.mir.10a.5p    | 0.109584469  | 0.500866259 | 0.85875158  | norepi | pearson |
| hsa.mir.30c.1.5p  | 0.193983625  | 0.230376382 | 0.742626021 | norepi | pearson |
| hsa.mir.199a.1.5p | 0.148730987  | 0.35969954  | 0.781903033 | norepi | pearson |
| hsa.mir.328.3p    | 0.183026924  | 0.264735724 | 0.749336711 | norepi | pearson |
| hsa.mir.186.5p    | 0.007922272  | 0.961304434 | 0.987559367 | norepi | pearson |
| hsa.mir.148b.3p   | 0.202865103  | 0.209315636 | 0.703474308 | norepi | pearson |
| hsa.let.7d.3p     | 0.330059812  | 0.037527778 | 0.534756328 | norepi | pearson |
| hsa.mir.146b.5p   | 0.246222234  | 0.125632646 | 0.587528341 | norepi | pearson |
| hsa.mir.143.3p    | -0.280096697 | 0.080024521 | 0.587528341 | norepi | pearson |
| hsa.mir.199a.1.3p | 0.287462705  | 0.072082125 | 0.587528341 | norepi | pearson |
| hsa.mir.222.3p    | -0.089754491 | 0.581791009 | 0.916595269 | norepi | pearson |
| hsa.mir.27b.3p    | 0.049029498  | 0.763843423 | 0.946599184 | norepi | pearson |
| hsa.mir.16.1.5p   | -0.081351744 | 0.617760448 | 0.918867489 | norepi | pearson |
| hsa.mir.532.5p    | -0.160036426 | 0.323916975 | 0.781903033 | norepi | pearson |
| hsa.mir.17.5p     | 0.050803674  | 0.755555087 | 0.946599184 | norepi | pearson |
| hsa.mir.484       | 0.115691714  | 0.477153002 | 0.856823132 | norepi | pearson |
| hsa.mir.15a.5p    | -0.18306211  | 0.258198305 | 0.74343305  | norepi | pearson |
| hsa.mir.181a.1.5p | 0.253545238  | 0.114420752 | 0.587528341 | norepi | pearson |
| hsa.mir.101.1.3p  | -0.067341219 | 0.679703975 | 0.918867489 | norepi | pearson |
| hsa.mir.99a.5p    | -0.239158481 | 0.137207217 | 0.587528341 | norepi | pearson |
| hsa.mir.25.3p     | -0.048736464 | 0.765214909 | 0.946599184 | norepi | pearson |
| hsa.mir.93.5p     | 0.014542086  | 0.929033907 | 0.983741977 | norepi | pearson |
| hsa.mir.122.5p    | -0.289221522 | 0.070280581 | 0.587528341 | norepi | pearson |
| hsa.mir.423.5p    | 0.31292087   | 0.04929684  | 0.548838148 | norepi | pearson |
| hsa.mir.320a      | 0.021164047  | 0.896864626 | 0.983741977 | norepi | pearson |
| hsa.mir.185.5p    | 0.044994372  | 0.782789789 | 0.956995824 | norepi | pearson |
| hsa.mir.126.5p    | 0.250053759  | 0.119668165 | 0.587528341 | norepi | pearson |
| hsa.mir.27a.3p    | -0.144123443 | 0.374940338 | 0.781903033 | norepi | pearson |
| hsa.mir.146a.5p   | 0.285399907  | 0.074241066 | 0.587528341 | norepi | pearson |
| hsa.let.7a.1.5p   | 0.353650282  | 0.025178717 | 0.534756328 | norepi | pearson |
| hsa.mir.24.1.3p   | 0.168038913  | 0.299985758 | 0.772034446 | norepi | pearson |
| hsa.mir.128.1.3p  | 0.25357243   | 0.114380579 | 0.587528341 | norepi | pearson |
| hsa.mir.26b.5p    | -0.054759857 | 0.737171366 | 0.946599184 | norepi | pearson |
| hsa.mir.20a.5p    | 0.021645113  | 0.894533335 | 0.983741977 | norepi | pearson |
| hsa.let.7b.5p     | -0.078612817 | 0.629683363 | 0.918867489 | norepi | pearson |
| hsa.mir.151a.3p   | 0.251405491  | 0.117615572 | 0.587528341 | norepi | pearson |
| hsa.mir.103a.1.3p | 0.342089526  | 0.030725046 | 0.534756328 | norepi | pearson |
| hsa.mir.423.3p    | 0.351177953  | 0.02628898  | 0.534756328 | norepi | pearson |
| hsa.mir.486.1.5p  | -0.054469093 | 0.738517734 | 0.946599184 | norepi | pearson |
| hsa.mir.148a.3p   | -0.244318159 | 0.12867811  | 0.587528341 | norepi | pearson |
| hsa.let.7f.1.5p   | 0.296641652  | 0.063067212 | 0.587528341 | norepi | pearson |
| hsa.mir.191.5p    | 0.345832342  | 0.028828757 | 0.534756328 | norepi | pearson |
| hsa.mir.30e.5p    | 0.109300472  | 0.501983354 | 0.85875158  | norepi | pearson |
| hsa.mir.486.2.5p  | 0.001767631  | 0.991363089 | 0.991363089 | norepi | pearson |
| hsa.mir.92a.1.3p  | -0.20446274  | 0.205674112 | 0.703474308 | norepi | pearson |
| hsa.let.7i.5p     | 0.326088889  | 0.040026323 | 0.534756328 | norepi | pearson |
| hsa.mir.30d.5p    | 0.37972779   | 0.015659803 | 0.534756328 | norepi | pearson |
| hsa.mir.22.3p     | -0.022961024 | 0.888160817 | 0.983741977 | norepi | pearson |
| hsa.mir.126.3p    | 0.186015214  | 0.250464345 | 0.742626021 | norepi | pearson |
| hsa.mir.21.5p     | 0.185668217  | 0.251364965 | 0.742626021 | norepi | pearson |
| hsa.let.7g.5p     | 0.270506512  | 0.091368922 | 0.587528341 | norepi | pearson |

|                  |              |             |             |        |         |
|------------------|--------------|-------------|-------------|--------|---------|
| hsa.mir.451a     | -0.156884151 | 0.333662427 | 0.781903033 | norepi | pearson |
| hsa.mir.26a.1.5p | 0.239466769  | 0.136686142 | 0.587528341 | norepi | pearson |
