# Supplementary material for: Effects of a short‐term cold exposure on circulating microRNAs and metabolic parameters in healthy adult subjects
Source: PubMed Central journal article supplement (PMC8743656; doi:10.1111/jcmm.17121), 2021-12-17
Supplement: JCMM-26-548-s003.pdf [file JCMM-26-548-s003.pdf]

**Differential correlation analysis of miRNAs at 14°C and RT.** miRNA pairs are indicated in column 1 and 2, magnitude and significance of correlation at 14°C; col 3 and 4, magnitude and significance of correlation at RT; col 5 and 6, difference in significance at 14°C and RT; col 7 and 8, difference in significance at RT and 14°C

| molecule X    | molecule Y    | r1           | p1          | r2           | p2          | r1-r2 | p1-p2 |
|---------------|---------------|--------------|-------------|--------------|-------------|-------|-------|
| mir-27b-3p    | mir-26a-2-5p  | 0.508945102  | 0.021919419 | 0.954662888  | 6.52E-11    |       |       |
| mir-27b-3p    | mir-26a-1-5p  | 0.508945102  | 0.021919419 | 0.954662888  | 6.52E-11    |       |       |
| let-7a-3-5p   | mir-23a-3p    | 0.618848455  | 0.003624706 | 0.961085989  | 1.69E-11    |       |       |
| let-7a-2-5p   | mir-23a-3p    | 0.618848455  | 0.003624706 | 0.961085989  | 1.69E-11    |       |       |
| let-7a-1-5p   | mir-23a-3p    | 0.618848455  | 0.003624706 | 0.961085989  | 1.69E-11    |       |       |
| mir-151a-3p   | mir-139-5p    | 0.448270567  | 0.047448308 | 0.932640116  | 2.12E-09    |       |       |
| mir-25-3p     | mir-20a-5p    | 0.983404599  | 8.54E-15    | 0.842677901  | 3.12E-06    |       |       |
| mir-27b-3p    | mir-423-3p    | 0.078132716  | 0.743348611 | 0.838801393  | 3.83E-06    |       |       |
| mir-191-5p    | mir-151a-3p   | 0.765632712  | 8.34E-05    | 0.971689012  | 1.00E-12    |       |       |
| let-7f-2-5p   | mir-23a-3p    | 0.607720767  | 0.004478198 | 0.948111871  | 2.14E-10    |       |       |
| let-7f-1-5p   | mir-23a-3p    | 0.607720767  | 0.004478198 | 0.948111871  | 2.14E-10    |       |       |
| let-7d-5p     | mir-23a-3p    | 0.444669293  | 0.04947889  | 0.918922569  | 1.07E-08    |       |       |
| mir-146b-5p   | mir-23a-3p    | 0.569530648  | 0.008760707 | 0.9403515    | 7.30E-10    |       |       |
| mir-151a-5p   | mir-148b-3p   | 0.095822513  | 0.687783135 | 0.829823163  | 6.02E-06    |       |       |
| mir-27b-3p    | mir-21-5p     | 0.581569507  | 0.007151639 | 0.941408956  | 6.24E-10    |       |       |
| mir-182-5p    | mir-103a-2-3p | 0.267856789  | 0.253546132 | -0.664279795 | 0.001400859 |       |       |
| mir-182-5p    | mir-103a-1-3p | 0.267856789  | 0.253546132 | -0.664279795 | 0.001400859 |       |       |
| mir-126-3p    | mir-103a-2-3p | 0.507205482  | 0.022452238 | 0.92531775   | 5.22E-09    |       |       |
| mir-126-3p    | mir-103a-1-3p | 0.507205482  | 0.022452238 | 0.92531775   | 5.22E-09    |       |       |
| mir-27b-3p    | let-7f-2-5p   | 0.463713803  | 0.039456732 | 0.909707062  | 2.72E-08    |       |       |
| mir-27b-3p    | let-7f-1-5p   | 0.463713803  | 0.039456732 | 0.909707062  | 2.72E-08    |       |       |
| mir-27b-3p    | mir-340-5p    | 0.411844979  | 0.071186809 | 0.897860945  | 7.89E-08    |       |       |
| mir-126-3p    | mir-139-5p    | 0.471080938  | 0.036032896 | 0.907894721  | 3.23E-08    |       |       |
| mir-24-2-3p   | mir-151a-3p   | 0.671280326  | 0.001193149 | 0.947992047  | 2.19E-10    |       |       |
| mir-151a-3p   | mir-24-1-3p   | 0.671280326  | 0.001193149 | 0.947992047  | 2.19E-10    |       |       |
| mir-146a-5p   | mir-146b-5p   | 0.651070917  | 0.001875948 | 0.943776916  | 4.34E-10    |       |       |
| mir-340-5p    | mir-148a-3p   | -0.399034082 | 0.08135614  | 0.508165398  | 0.022156975 |       |       |
| mir-99b-5p    | mir-99a-5p    | -0.064470811 | 0.787131047 | 0.718081356  | 0.000363096 |       |       |
| mir-744-5p    | mir-125b-1-5p | -0.523638384 | 0.017808445 | 0.359655136  | 0.119349379 |       |       |
| mir-744-5p    | mir-125b-2-5p | -0.523638384 | 0.017808445 | 0.359655136  | 0.119349379 |       |       |
| mir-423-3p    | mir-148a-3p   | -0.426230738 | 0.060935984 | 0.462726258  | 0.03993421  |       |       |
| mir-148a-3p   | mir-30c-1-5p  | -0.437016512 | 0.054014342 | 0.451825474  | 0.045507223 |       |       |
| mir-148a-3p   | mir-30c-2-5p  | -0.437016512 | 0.054014342 | 0.451825474  | 0.045507223 |       |       |
| mir-128-1-3p  | mir-139-5p    | 0.493682039  | 0.026953429 | 0.90418098   | 4.55E-08    |       |       |
| mir-139-5p    | mir-128-2-3p  | 0.493682039  | 0.026953429 | 0.90418098   | 4.55E-08    |       |       |
| mir-1307-3p   | mir-28-3p     | 0.462270102  | 0.040156266 | 0.896333244  | 8.97E-08    |       |       |
| mir-101-1-3p  | mir-25-3p     | 0.981639053  | 2.11E-14    | 0.883985605  | 2.36E-07    |       |       |
| mir-25-3p     | mir-101-2-3p  | 0.981639053  | 2.11E-14    | 0.883985605  | 2.36E-07    |       |       |
| mir-27b-3p    | mir-151a-5p   | -0.030402782 | 0.898750908 | 0.723686261  | 0.000310047 |       |       |
| mir-98-5p     | mir-23a-3p    | 0.543085238  | 0.013340639 | 0.914153171  | 1.76E-08    |       |       |
| mir-125a-5p   | mir-99a-5p    | -0.274664254 | 0.241215384 | 0.575793607  | 0.007890385 |       |       |
| mir-182-5p    | mir-151a-3p   | -0.041713245 | 0.861385367 | -0.752764359 | 0.00012816  |       |       |
| mir-182-5p    | mir-27b-3p    | -0.221798565 | 0.347308101 | -0.819872936 | 9.66E-06    |       |       |
| mir-125b-1-5p | mir-99b-5p    | -0.20944466  | 0.375487346 | 0.609488551  | 0.004332482 |       |       |
| mir-99b-5p    | mir-125b-2-5p | -0.20944466  | 0.375487346 | 0.609488551  | 0.004332482 |       |       |
| mir-27b-3p    | let-7d-5p     | 0.295260991  | 0.206290773 | 0.840654534  | 3.47E-06    |       |       |
| mir-199a-2-3p | mir-629-5p    | -0.321250227 | 0.167247293 | -0.848542725 | 2.27E-06    |       |       |
| mir-629-5p    | mir-199a-1-3p | -0.321250227 | 0.167247293 | -0.848542725 | 2.27E-06    |       |       |
| mir-629-5p    | mir-199b-3p   | -0.321250227 | 0.167247293 | -0.848542725 | 2.27E-06    |       |       |
| mir-125a-5p   | mir-125b-1-5p | -0.324427775 | 0.162849516 | 0.523446806  | 0.017857754 |       |       |
| mir-125a-5p   | mir-125b-2-5p | -0.324427775 | 0.162849516 | 0.523446806  | 0.017857754 |       |       |
| mir-148b-3p   | mir-106b-3p   | 0.441520007  | 0.051308582 | -0.413936398 | 0.069621459 |       |       |
| mir-103a-2-3p | mir-629-5p    | 0.159628362  | 0.501428042 | -0.636416461 | 0.002553957 |       |       |
| mir-103a-1-3p | mir-629-5p    | 0.159628362  | 0.501428042 | -0.636416461 | 0.002553957 |       |       |
| mir-103a-2-3p | mir-92a-2-3p  | -0.251767435 | 0.284255385 | -0.822209596 | 8.67E-06    |       |       |
| mir-103a-2-3p | mir-92a-1-3p  | -0.251767435 | 0.284255385 | -0.822209596 | 8.67E-06    |       |       |
| mir-92a-2-3p  | mir-103a-1-3p | -0.251767435 | 0.284255385 | -0.822209596 | 8.67E-06    |       |       |
| mir-103a-1-3p | mir-92a-1-3p  | -0.251767435 | 0.284255385 | -0.822209596 | 8.67E-06    |       |       |
| let-7a-3-5p   | mir-125b-1-5p | -0.232827763 | 0.323222698 | 0.582590899  | 0.007027097 |       |       |

|               |               |              |             |              |             |
|---------------|---------------|--------------|-------------|--------------|-------------|
| let-7a-3-5p   | mir-125b-2-5p | -0.232827763 | 0.323222698 | 0.582590899  | 0.007027097 |
| let-7a-2-5p   | mir-125b-1-5p | -0.232827763 | 0.323222698 | 0.582590899  | 0.007027097 |
| let-7a-2-5p   | mir-125b-2-5p | -0.232827763 | 0.323222698 | 0.582590899  | 0.007027097 |
| let-7a-1-5p   | mir-125b-1-5p | -0.232827763 | 0.323222698 | 0.582590899  | 0.007027097 |
| let-7a-1-5p   | mir-125b-2-5p | -0.232827763 | 0.323222698 | 0.582590899  | 0.007027097 |
| let-7a-3-5p   | mir-99a-5p    | -0.27242155  | 0.245234291 | 0.552479127  | 0.011533317 |
| let-7a-2-5p   | mir-99a-5p    | -0.27242155  | 0.245234291 | 0.552479127  | 0.011533317 |
| let-7a-1-5p   | mir-99a-5p    | -0.27242155  | 0.245234291 | 0.552479127  | 0.011533317 |
| mir-146b-5p   | mir-221-3p    | 0.776267351  | 5.73E-05    | 0.959286455  | 2.52E-11    |
| mir-191-5p    | mir-24-2-3p   | 0.711330124  | 0.000437083 | 0.945345711  | 3.39E-10    |
| mir-191-5p    | mir-24-1-3p   | 0.711330124  | 0.000437083 | 0.945345711  | 3.39E-10    |
| mir-126-3p    | mir-181a-2-5p | 0.46395946   | 0.039338648 | 0.88270801   | 2.59E-07    |
| mir-126-3p    | mir-181a-1-5p | 0.46395946   | 0.039338648 | 0.88270801   | 2.59E-07    |
| mir-106b-3p   | mir-20a-5p    | 0.930721691  | 2.71E-09    | 0.652316007  | 0.001826073 |
| mir-27b-3p    | mir-150-5p    | 0.579702582  | 0.007383949 | -0.21782914  | 0.356224883 |
| mir-146a-5p   | mir-151a-3p   | 0.554243782  | 0.011217057 | 0.906510735  | 3.68E-08    |
| mir-182-5p    | mir-98-5p     | -0.094147593 | 0.692983723 | -0.74965327  | 0.000141649 |
| mir-423-3p    | mir-148b-3p   | 0.094612092  | 0.691540127 | 0.749268679  | 0.000143398 |
| mir-21-5p     | mir-148a-3p   | -0.324465002 | 0.162798471 | 0.491942114  | 0.027580728 |
| mir-30c-1-5p  | mir-99a-5p    | -0.34465048  | 0.136720725 | 0.47374804   | 0.034852089 |
| mir-99a-5p    | mir-30c-2-5p  | -0.34465048  | 0.136720725 | 0.47374804   | 0.034852089 |
| mir-28-3p     | mir-20b-5p    | -0.126264722 | 0.595803423 | -0.761572722 | 9.58E-05    |
| mir-146b-5p   | mir-139-5p    | 0.341437548  | 0.140660435 | 0.841144778  | 3.39E-06    |
| mir-199a-1-5p | mir-148a-3p   | -0.405387504 | 0.076186385 | 0.407845204  | 0.07425366  |
| mir-148a-3p   | mir-199a-2-5p | -0.405387504 | 0.076186385 | 0.407845204  | 0.07425366  |
| mir-146b-5p   | mir-199a-2-3p | 0.668241384  | 0.001279882 | 0.931186935  | 2.56E-09    |
| mir-146b-5p   | mir-199a-1-3p | 0.668241384  | 0.001279882 | 0.931186935  | 2.56E-09    |
| mir-146b-5p   | mir-199b-3p   | 0.668241384  | 0.001279882 | 0.931186935  | 2.56E-09    |
| mir-30d-5p    | mir-139-5p    | 0.506479769  | 0.022677528 | 0.888755146  | 1.64E-07    |
| mir-151a-5p   | mir-148a-3p   | -0.454499854 | 0.044087653 | 0.34904058   | 0.131464217 |
| mir-27b-3p    | mir-10b-5p    | 0.55453644   | 0.011165293 | -0.224722857 | 0.340822921 |
| mir-146a-5p   | mir-629-5p    | -0.401548962 | 0.079279613 | -0.856190867 | 1.46E-06    |
| let-7d-5p     | mir-99a-5p    | -0.418921441 | 0.065994508 | 0.384523171  | 0.094132517 |
| mir-181a-2-5p | mir-151a-3p   | 0.490022853  | 0.028285954 | 0.882523277  | 2.62E-07    |
| mir-151a-3p   | mir-181a-1-5p | 0.490022853  | 0.028285954 | 0.882523277  | 2.62E-07    |
| mir-423-3p    | mir-126-5p    | 0.093679928  | 0.694438188 | 0.737270483  | 0.000208099 |
| mir-125b-1-5p | let-7d-3p     | -0.207480756 | 0.380082545 | 0.564855755  | 0.009460073 |
| let-7d-3p     | mir-125b-2-5p | -0.207480756 | 0.380082545 | 0.564855755  | 0.009460073 |
| mir-223-3p    | mir-148a-3p   | -0.356114851 | 0.123297556 | 0.443417759  | 0.050199931 |
| mir-192-5p    | mir-486-2-5p  | 0.921391886  | 8.16E-09    | 0.635524845  | 0.002601057 |
| mir-125a-5p   | mir-122-5p    | -0.232317871 | 0.324313696 | 0.544385236  | 0.013077726 |
| let-7f-2-5p   | mir-98-5p     | 0.84058932   | 3.49E-06    | 0.968653777  | 2.48E-12    |
| mir-98-5p     | let-7f-1-5p   | 0.84058932   | 3.49E-06    | 0.968653777  | 2.48E-12    |
| mir-103a-2-3p | mir-24-2-3p   | 0.487445571  | 0.029255189 | 0.880396321  | 3.06E-07    |
| mir-103a-2-3p | mir-24-1-3p   | 0.487445571  | 0.029255189 | 0.880396321  | 3.06E-07    |
| mir-103a-1-3p | mir-24-2-3p   | 0.487445571  | 0.029255189 | 0.880396321  | 3.06E-07    |
| mir-103a-1-3p | mir-24-1-3p   | 0.487445571  | 0.029255189 | 0.880396321  | 3.06E-07    |
| mir-182-5p    | mir-28-3p     | -0.193032478 | 0.414847014 | -0.777517346 | 5.47E-05    |
| mir-27b-3p    | mir-103a-2-3p | 0.305198164  | 0.190708617 | 0.819828216  | 9.68E-06    |
| mir-27b-3p    | mir-103a-1-3p | 0.305198164  | 0.190708617 | 0.819828216  | 9.68E-06    |
| mir-182-5p    | mir-199a-2-3p | -0.313506152 | 0.178304695 | -0.822672083 | 8.48E-06    |
| mir-182-5p    | mir-199a-1-3p | -0.313506152 | 0.178304695 | -0.822672083 | 8.48E-06    |
| mir-182-5p    | mir-199b-3p   | -0.313506152 | 0.178304695 | -0.822672083 | 8.48E-06    |
| mir-199a-2-3p | mir-23a-3p    | 0.607051083  | 0.004534446 | 0.912921178  | 1.99E-08    |
| mir-199a-1-3p | mir-23a-3p    | 0.607051083  | 0.004534446 | 0.912921178  | 1.99E-08    |
| mir-199b-3p   | mir-23a-3p    | 0.607051083  | 0.004534446 | 0.912921178  | 1.99E-08    |
| mir-27b-3p    | mir-223-3p    | 0.469490575  | 0.036751672 | 0.873853454  | 4.82E-07    |
| mir-146b-5p   | mir-28-3p     | 0.468395428  | 0.037253078 | 0.87254141   | 5.26E-07    |
| mir-629-5p    | norepi        | 0.138742566  | 0.559653214 | -0.60083287  | 0.005085149 |
| mir-375       | norepi        | -0.242942178 | 0.302034706 | 0.525807635  | 0.017257679 |
| mir-27b-3p    | mir-146b-5p   | 0.583538116  | 0.006913193 | 0.905151116  | 4.16E-08    |
| mir-25-3p     | mir-148b-3p   | 0.515554197  | 0.019985998 | -0.253952188 | 0.279956197 |
| mir-21-5p     | mir-28-3p     | 0.489589356  | 0.028447187 | 0.877354243  | 3.79E-07    |
| mir-744-5p    | mir-99a-5p    | -0.381226122 | 0.097229421 | 0.40150305   | 0.079317166 |

|               |               |              |             |              |             |
|---------------|---------------|--------------|-------------|--------------|-------------|
| mir-744-5p    | mir-122-5p    | -0.296930065 | 0.203616355 | 0.475595446  | 0.034052029 |
| mir-25-3p     | mir-186-5p    | 0.954145919  | 7.20E-11    | 0.783153911  | 4.44E-05    |
| mir-27b-3p    | mir-181a-2-5p | 0.202907743  | 0.390904156 | 0.77277378   | 6.49E-05    |
| mir-27b-3p    | mir-181a-1-5p | 0.202907743  | 0.390904156 | 0.77277378   | 6.49E-05    |
| mir-92a-2-3p  | mir-122-5p    | 0.121458583  | 0.609981682 | -0.603517025 | 0.004841034 |
| mir-122-5p    | mir-92a-1-3p  | 0.121458583  | 0.609981682 | -0.603517025 | 0.004841034 |
| mir-148b-3p   | mir-486-2-5p  | 0.422623303  | 0.063394542 | -0.352688454 | 0.12720658  |
| mir-26a-2-5p  | mir-148a-3p   | -0.322641055 | 0.165312448 | 0.449601866  | 0.046714075 |
| mir-148a-3p   | mir-26a-1-5p  | -0.322641055 | 0.165312448 | 0.449601866  | 0.046714075 |
| mir-106a-5p   | mir-122-5p    | 0.281222673  | 0.229707067 | -0.485048879 | 0.030179736 |
| mir-92a-2-3p  | mir-191-5p    | -0.587632959 | 0.006438046 | -0.903427179 | 4.87E-08    |
| mir-191-5p    | mir-92a-1-3p  | -0.587632959 | 0.006438046 | -0.903427179 | 4.87E-08    |
| mir-199a-2-3p | mir-151a-3p   | 0.661037809  | 0.00150688  | 0.923211492  | 6.66E-09    |
| mir-151a-3p   | mir-199a-1-3p | 0.661037809  | 0.00150688  | 0.923211492  | 6.66E-09    |
| mir-151a-3p   | mir-199b-3p   | 0.661037809  | 0.00150688  | 0.923211492  | 6.66E-09    |
| let-7i-5p     | mir-139-5p    | 0.176114167  | 0.457646252 | 0.758719023  | 0.000105393 |
| mir-146b-5p   | mir-1307-3p   | 0.46415171   | 0.039246426 | 0.866118131  | 7.99E-07    |
| mir-126-3p    | mir-182-5p    | -0.211676001 | 0.370304645 | -0.771062806 | 6.90E-05    |
| mir-106b-3p   | mir-186-5p    | 0.914826956  | 1.64E-08    | 0.635148565  | 0.002621151 |
| mir-92a-2-3p  | mir-99a-5p    | 0.076584929  | 0.748273583 | -0.621771818 | 0.003424407 |
| mir-99a-5p    | mir-92a-1-3p  | 0.076584929  | 0.748273583 | -0.621771818 | 0.003424407 |
| mir-30d-5p    | mir-126-5p    | 0.556259446  | 0.010864447 | 0.891822657  | 1.29E-07    |
| mir-146a-5p   | mir-15a-5p    | -0.534304365 | 0.015230198 | -0.884791037 | 2.22E-07    |
| mir-194-2-5p  | mir-15a-5p    | 0.844504127  | 2.83E-06    | 0.409837063  | 0.072714306 |
| mir-194-1-5p  | mir-15a-5p    | 0.844504127  | 2.83E-06    | 0.409837063  | 0.072714306 |
| mir-148a-3p   | mir-375       | 0.315310733  | 0.175684758 | -0.440603481 | 0.051850663 |
| mir-182-5p    | mir-148b-3p   | 0.380020174  | 0.098380533 | -0.378935131 | 0.099424705 |
| mir-92a-2-3p  | mir-151a-3p   | -0.633783171 | 0.002695153 | -0.913100422 | 1.95E-08    |
| mir-151a-3p   | mir-92a-1-3p  | -0.633783171 | 0.002695153 | -0.913100422 | 1.95E-08    |
| mir-122-5p    | mir-99b-5p    | -0.03413339  | 0.886399864 | 0.642445819  | 0.002253747 |
| mir-27b-3p    | mir-98-5p     | 0.416134258  | 0.068004398 | 0.844936656  | 2.76E-06    |
| mir-7-3-5p    | mir-192-5p    | 0.92323064   | 6.64E-09    | 0.672779922  | 0.001152208 |
| mir-192-5p    | mir-7-1-5p    | 0.92323064   | 6.64E-09    | 0.672779922  | 0.001152208 |
| mir-192-5p    | mir-7-2-5p    | 0.92323064   | 6.64E-09    | 0.672779922  | 0.001152208 |
| mir-584-5p    | mir-99a-5p    | -0.569891394 | 0.008708541 | 0.144363341  | 0.54369392  |
| mir-27b-3p    | mir-361-5p    | 0.571770371  | 0.008440907 | 0.894219614  | 1.07E-07    |
| mir-151a-3p   | mir-221-3p    | 0.722185527  | 0.000323557 | 0.935630515  | 1.42E-09    |
| mir-182-5p    | norepi        | 0.233128342  | 0.322580586 | -0.500411344 | 0.024632379 |
| mir-92a-2-3p  | mir-194-2-5p  | 0.686205013  | 0.000835499 | 0.057516482  | 0.809665132 |
| mir-92a-2-3p  | mir-194-1-5p  | 0.686205013  | 0.000835499 | 0.057516482  | 0.809665132 |
| mir-194-2-5p  | mir-92a-1-3p  | 0.686205013  | 0.000835499 | 0.057516482  | 0.809665132 |
| mir-194-1-5p  | mir-92a-1-3p  | 0.686205013  | 0.000835499 | 0.057516482  | 0.809665132 |
| mir-146a-5p   | mir-23a-3p    | 0.670220969  | 0.001222804 | 0.920736397  | 8.77E-09    |
| mir-629-5p    | mir-148b-3p   | 0.41198621   | 0.071080281 | -0.331309651 | 0.153599576 |
| mir-486-2-5p  | mir-28-3p     | -0.207832919 | 0.37925623  | -0.757624081 | 0.000109297 |
| mir-26a-2-5p  | mir-23a-3p    | 0.561834921  | 0.009935671 | 0.887938403  | 1.75E-07    |
| mir-23a-3p    | mir-26a-1-5p  | 0.561834921  | 0.009935671 | 0.887938403  | 1.75E-07    |
| mir-146a-5p   | mir-744-5p    | 0.80114606   | 2.19E-05    | 0.954166355  | 7.18E-11    |
| mir-92a-2-3p  | mir-125b-1-5p | 0.297386747  | 0.202888633 | -0.435026673 | 0.055243921 |
| mir-92a-2-3p  | mir-125b-2-5p | 0.297386747  | 0.202888633 | -0.435026673 | 0.055243921 |
| mir-125b-1-5p | mir-92a-1-3p  | 0.297386747  | 0.202888633 | -0.435026673 | 0.055243921 |
| mir-125b-2-5p | mir-92a-1-3p  | 0.297386747  | 0.202888633 | -0.435026673 | 0.055243921 |
| mir-27b-3p    | mir-146a-5p   | 0.50415333   | 0.023411854 | 0.868611035  | 6.81E-07    |
| let-7f-2-5p   | mir-125b-1-5p | -0.263980611 | 0.260743129 | 0.462249963  | 0.040166092 |
| let-7f-2-5p   | mir-125b-2-5p | -0.263980611 | 0.260743129 | 0.462249963  | 0.040166092 |
| mir-125b-1-5p | let-7f-1-5p   | -0.263980611 | 0.260743129 | 0.462249963  | 0.040166092 |
| let-7f-1-5p   | mir-125b-2-5p | -0.263980611 | 0.260743129 | 0.462249963  | 0.040166092 |
| mir-182-5p    | mir-146a-5p   | -0.413338251 | 0.070066489 | -0.836562119 | 4.30E-06    |
| mir-106a-5p   | mir-192-5p    | 0.896874039  | 8.57E-08    | 0.597144439  | 0.005437071 |
| mir-423-3p    | mir-151a-3p   | 0.321010453  | 0.167582417 | 0.800069072  | 2.29E-05    |
| mir-26a-2-5p  | mir-139-5p    | 0.518034112  | 0.019296608 | 0.871505873  | 5.64E-07    |
| mir-139-5p    | mir-26a-1-5p  | 0.518034112  | 0.019296608 | 0.871505873  | 5.64E-07    |
| mir-125b-1-5p | let-7d-5p     | -0.28490269  | 0.22340866  | 0.44024276   | 0.052065208 |
| let-7d-5p     | mir-125b-2-5p | -0.28490269  | 0.22340866  | 0.44024276   | 0.052065208 |

|               |               |              |             |              |             |
|---------------|---------------|--------------|-------------|--------------|-------------|
| mir-30c-1-5p  | mir-27a-3p    | -0.141852086 | 0.550798593 | 0.549897454  | 0.012008972 |
| mir-27a-3p    | mir-30c-2-5p  | -0.141852086 | 0.550798593 | 0.549897454  | 0.012008972 |
| mir-148b-3p   | mir-139-5p    | -0.021317079 | 0.928919718 | 0.628434858  | 0.003002003 |
| mir-182-5p    | mir-191-5p    | -0.186899719 | 0.430105111 | -0.738590608 | 0.000199937 |
| mir-148a-3p   | mir-139-5p    | -0.42811877  | 0.059678351 | 0.291694987  | 0.212082506 |
| mir-148a-3p   | mir-374b-5p   | -0.155421475 | 0.512914983 | 0.537224594  | 0.014579343 |
| mir-144-3p    | norepi        | 0.156642353  | 0.509568518 | -0.535268155 | 0.01501286  |
| mir-98-5p     | mir-629-5p    | -0.184048216 | 0.437299534 | -0.735461275 | 0.000219746 |
| mir-148b-3p   | mir-20b-5p    | 0.44836247   | 0.047397339 | -0.265019478 | 0.258801709 |
| mir-199a-1-5p | mir-125a-5p   | 0.819907743  | 9.65E-06    | 0.384016312  | 0.094603846 |
| mir-125a-5p   | mir-199a-2-5p | 0.819907743  | 9.65E-06    | 0.384016312  | 0.094603846 |
| mir-27b-3p    | mir-139-5p    | 0.320779864  | 0.167905139 | 0.794741191  | 2.84E-05    |
| mir-361-5p    | mir-199a-2-3p | 0.79641947   | 2.65E-05    | 0.95044122   | 1.43E-10    |
| mir-361-5p    | mir-199a-1-3p | 0.79641947   | 2.65E-05    | 0.95044122   | 1.43E-10    |
| mir-361-5p    | mir-199b-3p   | 0.79641947   | 2.65E-05    | 0.95044122   | 1.43E-10    |
| mir-340-5p    | mir-126-5p    | 0.488448569  | 0.028874941 | 0.856833746  | 1.41E-06    |
| mir-320a      | mir-148b-3p   | 0.550082108  | 0.011974433 | -0.127994702 | 0.590733787 |
| mir-27b-3p    | mir-199a-2-3p | 0.519379651  | 0.018930579 | 0.867426906  | 7.35E-07    |
| mir-27b-3p    | mir-199a-1-3p | 0.519379651  | 0.018930579 | 0.867426906  | 7.35E-07    |
| mir-27b-3p    | mir-199b-3p   | 0.519379651  | 0.018930579 | 0.867426906  | 7.35E-07    |
| mir-99a-5p    | let-7d-3p     | -0.19300199  | 0.414922136 | 0.499295437  | 0.025005927 |
| mir-22-3p     | mir-93-5p     | 0.929874889  | 3.01E-09    | 0.723113911  | 0.000315141 |
| mir-20a-5p    | mir-486-2-5p  | 0.944994439  | 3.58E-10    | 0.778050204  | 5.37E-05    |
| mir-146a-5p   | mir-30c-1-5p  | 0.922786672  | 6.98E-09    | 0.69966086   | 0.000595259 |
| mir-146a-5p   | mir-30c-2-5p  | 0.922786672  | 6.98E-09    | 0.69966086   | 0.000595259 |
| mir-423-3p    | mir-99a-5p    | -0.560158912 | 0.010207808 | 0.107096786  | 0.653137086 |
| mir-103a-2-3p | mir-20b-5p    | 0.329369637  | 0.156169323 | -0.378559597 | 0.099787967 |
| mir-103a-1-3p | mir-20b-5p    | 0.329369637  | 0.156169323 | -0.378559597 | 0.099787967 |
| mir-744-5p    | mir-151a-3p   | 0.541515434  | 0.013663781 | 0.873110675  | 5.06E-07    |
| mir-125a-5p   | mir-30c-1-5p  | 0.847398574  | 2.42E-06    | 0.469134578  | 0.036914084 |
| mir-125a-5p   | mir-30c-2-5p  | 0.847398574  | 2.42E-06    | 0.469134578  | 0.036914084 |
| mir-103a-2-3p | mir-15a-5p    | -0.02089722  | 0.930316416 | -0.639411745 | 0.002400903 |
| mir-103a-1-3p | mir-15a-5p    | -0.02089722  | 0.930316416 | -0.639411745 | 0.002400903 |
| mir-103a-2-3p | mir-106b-3p   | 0.177648825  | 0.453673242 | -0.505513078 | 0.022980406 |
| mir-103a-1-3p | mir-106b-3p   | 0.177648825  | 0.453673242 | -0.505513078 | 0.022980406 |
| mir-27b-3p    | mir-584-5p    | -0.021412786 | 0.928601369 | 0.613438109  | 0.004021046 |
| mir-98-5p     | mir-15a-5p    | -0.273543819 | 0.243217864 | -0.767436927 | 7.84E-05    |
| mir-125a-5p   | norepi        | 0.154848423  | 0.514489335 | 0.710891524  | 0.000442303 |
| mir-148a-3p   | mir-486-2-5p  | 0.34052541   | 0.141793283 | -0.360900195 | 0.117982624 |
| mir-23a-3p    | let-7d-3p     | 0.640519415  | 0.002346277 | 0.903515824  | 4.83E-08    |
| mir-29a-3p    | mir-30c-1-5p  | 0.033226293  | 0.889400804 | 0.642653827  | 0.002243941 |
| mir-29a-3p    | mir-30c-2-5p  | 0.033226293  | 0.889400804 | 0.642653827  | 0.002243941 |
| mir-148b-3p   | mir-30c-1-5p  | 0.153124624  | 0.519238942 | 0.708119453  | 0.000476539 |
| mir-148b-3p   | mir-30c-2-5p  | 0.153124624  | 0.519238942 | 0.708119453  | 0.000476539 |
| mir-191-5p    | mir-125b-1-5p | -0.292247757 | 0.211177771 | 0.403632871  | 0.077588971 |
| mir-191-5p    | mir-125b-2-5p | -0.292247757 | 0.211177771 | 0.403632871  | 0.077588971 |
| let-7f-2-5p   | mir-99a-5p    | -0.236977316 | 0.314425518 | 0.452026683  | 0.045399212 |
| let-7f-1-5p   | mir-99a-5p    | -0.236977316 | 0.314425518 | 0.452026683  | 0.045399212 |
| mir-340-5p    | mir-139-5p    | 0.543124208  | 0.013332696 | 0.870780383  | 5.91E-07    |
| mir-101-1-3p  | mir-486-2-5p  | 0.960241327  | 2.04E-11    | 0.840470251  | 3.51E-06    |
| mir-486-2-5p  | mir-101-2-3p  | 0.960241327  | 2.04E-11    | 0.840470251  | 3.51E-06    |
| mir-199a-2-3p | mir-15a-5p    | -0.507477957 | 0.022368112 | -0.857789313 | 1.33E-06    |
| mir-15a-5p    | mir-199a-1-3p | -0.507477957 | 0.022368112 | -0.857789313 | 1.33E-06    |
| mir-15a-5p    | mir-199b-3p   | -0.507477957 | 0.022368112 | -0.857789313 | 1.33E-06    |
| mir-125b-1-5p | mir-30c-1-5p  | -0.266668771 | 0.255738382 | 0.423678854  | 0.062667546 |
| mir-125b-1-5p | mir-30c-2-5p  | -0.266668771 | 0.255738382 | 0.423678854  | 0.062667546 |
| mir-30c-1-5p  | mir-125b-2-5p | -0.266668771 | 0.255738382 | 0.423678854  | 0.062667546 |
| mir-30c-2-5p  | mir-125b-2-5p | -0.266668771 | 0.255738382 | 0.423678854  | 0.062667546 |
| mir-126-3p    | mir-423-3p    | 0.304307854  | 0.192071405 | 0.777259935  | 5.53E-05    |
| mir-3615      | mir-28-3p     | -0.239477877 | 0.309194451 | -0.747307414 | 0.000152608 |
| mir-27b-3p    | mir-744-5p    | 0.449528461  | 0.04675433  | 0.835610649  | 4.51E-06    |
| let-7f-2-5p   | mir-139-5p    | 0.533325363  | 0.015453547 | 0.865969785  | 8.07E-07    |
| mir-139-5p    | let-7f-1-5p   | 0.533325363  | 0.015453547 | 0.865969785  | 8.07E-07    |
| mir-199a-2-3p | mir-99a-5p    | -0.245649291 | 0.296510657 | 0.438345926  | 0.053204555 |

|               |               |              |             |              |             |
|---------------|---------------|--------------|-------------|--------------|-------------|
| mir-199a-1-3p | mir-99a-5p    | -0.245649291 | 0.296510657 | 0.438345926  | 0.053204555 |
| mir-199b-3p   | mir-99a-5p    | -0.245649291 | 0.296510657 | 0.438345926  | 0.053204555 |
| mir-126-3p    | mir-23a-3p    | 0.643880055  | 0.002186854 | 0.902485601  | 5.29E-08    |
| mir-199a-1-5p | mir-28-3p     | 0.304509436  | 0.191762275 | 0.774039804  | 6.21E-05    |
| mir-199a-2-5p | mir-28-3p     | 0.304509436  | 0.191762275 | 0.774039804  | 6.21E-05    |
| mir-103a-2-3p | mir-486-2-5p  | 0.303210267  | 0.193760453 | -0.381142953 | 0.097308491 |
| mir-103a-1-3p | mir-486-2-5p  | 0.303210267  | 0.193760453 | -0.381142953 | 0.097308491 |
| mir-22-3p     | mir-25-3p     | 0.868292535  | 6.95E-07    | 0.546082695  | 0.012740741 |
| mir-139-5p    | mir-99a-5p    | -0.133900021 | 0.573566924 | 0.521247676  | 0.018431625 |
| mir-27b-3p    | let-7a-3-5p   | 0.433706948  | 0.056071088 | 0.826218492  | 7.17E-06    |
| mir-27b-3p    | let-7a-2-5p   | 0.433706948  | 0.056071088 | 0.826218492  | 7.17E-06    |
| mir-27b-3p    | let-7a-1-5p   | 0.433706948  | 0.056071088 | 0.826218492  | 7.17E-06    |
| mir-221-3p    | mir-99a-5p    | -0.096857979 | 0.684574757 | 0.546769405  | 0.012606421 |
| mir-532-5p    | mir-122-5p    | 0.152405343  | 0.521226884 | -0.505609293 | 0.022950118 |
| mir-21-5p     | mir-23a-3p    | 0.621160601  | 0.003465508 | 0.892838731  | 1.19E-07    |
| mir-181a-2-5p | mir-28-5p     | 0.59705931   | 0.005445425 | 0.884702882  | 2.23E-07    |
| mir-28-5p     | mir-181a-1-5p | 0.59705931   | 0.005445425 | 0.884702882  | 2.23E-07    |
| mir-126-3p    | mir-191-5p    | 0.729395837  | 0.000262949 | 0.926874661  | 4.35E-09    |
| mir-122-5p    | let-7d-5p     | -0.374813524 | 0.103464703 | 0.304192911  | 0.192247823 |
| mir-320a      | mir-106b-3p   | 0.935309791  | 1.49E-09    | 0.757868469  | 0.000108415 |
| mir-191-5p    | mir-139-5p    | 0.665751005  | 0.001354857 | 0.906827365  | 3.57E-08    |
| mir-126-3p    | mir-361-5p    | 0.672999169  | 0.001146323 | 0.909030781  | 2.90E-08    |
| mir-151a-3p   | mir-15a-5p    | -0.360619439 | 0.118289838 | -0.793621301 | 2.97E-05    |
| mir-92a-2-3p  | mir-146a-5p   | -0.561447179 | 0.009998099 | -0.871297408 | 5.72E-07    |
| mir-146a-5p   | mir-92a-1-3p  | -0.561447179 | 0.009998099 | -0.871297408 | 5.72E-07    |
| let-7i-5p     | mir-126-5p    | 0.384577528  | 0.094082072 | 0.803583193  | 1.98E-05    |
| mir-92a-2-3p  | mir-199a-2-3p | -0.585990394 | 0.006625315 | -0.879200474 | 3.33E-07    |
| mir-92a-2-3p  | mir-199a-1-3p | -0.585990394 | 0.006625315 | -0.879200474 | 3.33E-07    |
| mir-92a-2-3p  | mir-199b-3p   | -0.585990394 | 0.006625315 | -0.879200474 | 3.33E-07    |
| mir-199a-2-3p | mir-92a-1-3p  | -0.585990394 | 0.006625315 | -0.879200474 | 3.33E-07    |
| mir-199a-1-3p | mir-92a-1-3p  | -0.585990394 | 0.006625315 | -0.879200474 | 3.33E-07    |
| mir-199b-3p   | mir-92a-1-3p  | -0.585990394 | 0.006625315 | -0.879200474 | 3.33E-07    |
| mir-181a-2-5p | mir-24-2-3p   | 0.525029352  | 0.017453692 | 0.857377365  | 1.37E-06    |
| mir-181a-2-5p | mir-24-1-3p   | 0.525029352  | 0.017453692 | 0.857377365  | 1.37E-06    |
| mir-24-2-3p   | mir-181a-1-5p | 0.525029352  | 0.017453692 | 0.857377365  | 1.37E-06    |
| mir-24-1-3p   | mir-181a-1-5p | 0.525029352  | 0.017453692 | 0.857377365  | 1.37E-06    |
| mir-744-5p    | mir-629-5p    | -0.579625904 | 0.00739362  | -0.876771165 | 3.95E-07    |
| let-7a-3-5p   | mir-122-5p    | -0.282510537 | 0.227489886 | 0.386105946  | 0.092671757 |
| let-7a-2-5p   | mir-122-5p    | -0.282510537 | 0.227489886 | 0.386105946  | 0.092671757 |
| mir-122-5p    | let-7a-1-5p   | -0.282510537 | 0.227489886 | 0.386105946  | 0.092671757 |
| let-7i-5p     | mir-374b-5p   | 0.342177075  | 0.139746643 | 0.783408394  | 4.40E-05    |
| mir-340-5p    | mir-148b-3p   | 0.408431544  | 0.073798021 | 0.811194139  | 1.43E-05    |
| mir-182-5p    | mir-148a-3p   | 0.356547445  | 0.122810192 | -0.312083837 | 0.180388271 |
| mir-423-3p    | mir-28-3p     | 0.409571764  | 0.072917946 | 0.8111111106 | 1.43E-05    |
| mir-122-5p    | mir-15a-5p    | 0.091060911  | 0.702602372 | -0.538710416 | 0.014256882 |
| mir-182-5p    | mir-221-3p    | -0.449878132 | 0.04656281  | -0.826565011 | 7.05E-06    |
| mir-199a-2-3p | mir-125b-1-5p | -0.251972928 | 0.283849284 | 0.409542956  | 0.072940085 |
| mir-199a-2-3p | mir-125b-2-5p | -0.251972928 | 0.283849284 | 0.409542956  | 0.072940085 |
| mir-125b-1-5p | mir-199a-1-3p | -0.251972928 | 0.283849284 | 0.409542956  | 0.072940085 |
| mir-125b-1-5p | mir-199b-3p   | -0.251972928 | 0.283849284 | 0.409542956  | 0.072940085 |
| mir-199a-1-3p | mir-125b-2-5p | -0.251972928 | 0.283849284 | 0.409542956  | 0.072940085 |
| mir-199b-3p   | mir-125b-2-5p | -0.251972928 | 0.283849284 | 0.409542956  | 0.072940085 |
| mir-98-5p     | let-7d-5p     | 0.858346888  | 1.29E-06    | 0.96244132   | 1.23E-11    |
| mir-98-5p     | mir-125b-1-5p | -0.129061801 | 0.587615773 | 0.508806651  | 0.021961453 |
| mir-98-5p     | mir-125b-2-5p | -0.129061801 | 0.587615773 | 0.508806651  | 0.021961453 |
| mir-106a-5p   | mir-148b-3p   | 0.449691507  | 0.046664953 | -0.201759318 | 0.393648386 |
| mir-486-2-5p  | mir-186-5p    | 0.920408639  | 9.09E-09    | 0.717755943  | 0.000366399 |
| mir-192-5p    | mir-25-3p     | 0.899094441  | 7.11E-08    | 0.652199138  | 0.001830707 |
| mir-182-5p    | mir-181a-2-5p | 0.119702283  | 0.615196736 | -0.513663417 | 0.020524681 |
| mir-182-5p    | mir-181a-1-5p | 0.119702283  | 0.615196736 | -0.513663417 | 0.020524681 |
| mir-182-5p    | mir-146b-5p   | -0.532533752 | 0.015636061 | -0.856883836 | 1.41E-06    |
| mir-629-5p    | mir-151a-3p   | -0.232982605 | 0.322891821 | -0.728285512 | 0.000271596 |
| mir-425-5p    | mir-106b-3p   | 0.707217001  | 0.000488159 | 0.19189605   | 0.417652101 |
| let-7a-3-5p   | mir-139-5p    | 0.615387203  | 0.003874325 | 0.885998048  | 2.03E-07    |

|               |               |              |             |              |             |
|---------------|---------------|--------------|-------------|--------------|-------------|
| let-7a-2-5p   | mir-139-5p    | 0.615387203  | 0.003874325 | 0.885998048  | 2.03E-07    |
| let-7a-1-5p   | mir-139-5p    | 0.615387203  | 0.003874325 | 0.885998048  | 2.03E-07    |
| mir-126-3p    | mir-146a-5p   | 0.673436422  | 0.001134661 | 0.905533387  | 4.02E-08    |
| mir-7-3-5p    | mir-122-5p    | 0.182469083  | 0.441310784 | -0.462266445 | 0.04015805  |
| mir-122-5p    | mir-7-1-5p    | 0.182469083  | 0.441310784 | -0.462266445 | 0.04015805  |
| mir-122-5p    | mir-7-2-5p    | 0.182469083  | 0.441310784 | -0.462266445 | 0.04015805  |
| mir-146a-5p   | mir-99a-5p    | -0.23989882  | 0.308319056 | 0.412642369  | 0.070586915 |
| mir-26a-2-5p  | mir-99a-5p    | -0.28422256  | 0.224564119 | 0.372273629  | 0.106012897 |
| mir-99a-5p    | mir-26a-1-5p  | -0.28422256  | 0.224564119 | 0.372273629  | 0.106012897 |
| mir-144-3p    | mir-107       | 0.958878191  | 2.75E-11    | 0.847955066  | 2.34E-06    |
| mir-103a-2-3p | mir-106a-5p   | 0.235757159  | 0.316997213 | -0.414343799 | 0.069319561 |
| mir-106a-5p   | mir-103a-1-3p | 0.235757159  | 0.316997213 | -0.414343799 | 0.069319561 |
| mir-125b-1-5p | mir-148a-3p   | 0.475654674  | 0.034026618 | -0.161989091 | 0.49503709  |
| mir-148a-3p   | mir-125b-2-5p | 0.475654674  | 0.034026618 | -0.161989091 | 0.49503709  |
| mir-125b-1-5p | mir-221-3p    | -0.25105051  | 0.285675005 | 0.399953484  | 0.080592372 |
| mir-221-3p    | mir-125b-2-5p | -0.25105051  | 0.285675005 | 0.399953484  | 0.080592372 |
| mir-122-5p    | mir-199a-2-3p | -0.207843964 | 0.37923033  | 0.437380117  | 0.053791933 |
| mir-122-5p    | mir-199a-1-3p | -0.207843964 | 0.37923033  | 0.437380117  | 0.053791933 |
| mir-122-5p    | mir-199b-3p   | -0.207843964 | 0.37923033  | 0.437380117  | 0.053791933 |
| mir-103a-2-3p | mir-361-5p    | 0.419266162  | 0.065749064 | 0.809882616  | 1.51E-05    |
| mir-361-5p    | mir-103a-1-3p | 0.419266162  | 0.065749064 | 0.809882616  | 1.51E-05    |
| mir-223-3p    | mir-148b-3p   | 0.362552556  | 0.116186123 | 0.785070432  | 4.13E-05    |
| mir-126-3p    | mir-26a-2-5p  | 0.762266579  | 9.36E-05    | 0.932850939  | 2.06E-09    |
| mir-126-3p    | mir-26a-1-5p  | 0.762266579  | 9.36E-05    | 0.932850939  | 2.06E-09    |
| mir-340-5p    | mir-99a-5p    | -0.323451808 | 0.164191699 | 0.329249354  | 0.156329624 |
| mir-26a-2-5p  | mir-103a-2-3p | 0.622919407  | 0.003348332 | 0.88672534   | 1.92E-07    |
| mir-26a-2-5p  | mir-103a-1-3p | 0.622919407  | 0.003348332 | 0.88672534   | 1.92E-07    |
| mir-103a-2-3p | mir-26a-1-5p  | 0.622919407  | 0.003348332 | 0.88672534   | 1.92E-07    |
| mir-103a-1-3p | mir-26a-1-5p  | 0.622919407  | 0.003348332 | 0.88672534   | 1.92E-07    |
| mir-126-3p    | mir-151a-3p   | 0.77582402   | 5.82E-05    | 0.936736165  | 1.22E-09    |
| mir-185-5p    | mir-20b-5p    | 0.941669326  | 6.00E-10    | 0.792013655  | 3.16E-05    |
| mir-629-5p    | mir-107       | 0.916905595  | 1.32E-08    | 0.713249327  | 0.000414852 |
| mir-103a-2-3p | mir-144-3p    | 0.33029373   | 0.154941579 | -0.319969934 | 0.169042054 |
| mir-144-3p    | mir-103a-1-3p | 0.33029373   | 0.154941579 | -0.319969934 | 0.169042054 |
| mir-98-5p     | mir-99a-5p    | -0.256904249 | 0.274211588 | 0.390021005  | 0.089129997 |
| mir-181a-2-5p | mir-139-5p    | 0.58381914   | 0.006879692 | 0.872145723  | 5.40E-07    |
| mir-139-5p    | mir-181a-1-5p | 0.58381914   | 0.006879692 | 0.872145723  | 5.40E-07    |
| mir-27b-3p    | mir-28-3p     | 0.501646933  | 0.02422393  | 0.841182106  | 3.38E-06    |
| let-7b-5p     | mir-148b-3p   | 0.381236506  | 0.097219552 | -0.265452325 | 0.257995519 |
| mir-629-5p    | mir-15b-5p    | 0.540017354  | 0.013978014 | -0.068977835 | 0.772612304 |
| mir-27b-3p    | mir-148b-3p   | 0.173364423  | 0.46480933  | 0.689322059  | 0.000773595 |
| mir-101-1-3p  | mir-106b-3p   | 0.941477591  | 6.18E-10    | 0.793111272  | 3.03E-05    |
| mir-106b-3p   | mir-101-2-3p  | 0.941477591  | 6.18E-10    | 0.793111272  | 3.03E-05    |
| mir-182-5p    | mir-128-1-3p  | 0.05608341   | 0.814327299 | -0.546596957 | 0.012640044 |
| mir-182-5p    | mir-128-2-3p  | 0.05608341   | 0.814327299 | -0.546596957 | 0.012640044 |
| mir-148a-3p   | mir-106b-3p   | 0.306560733  | 0.188635565 | -0.338772488 | 0.1439883   |
| mir-103a-2-3p | mir-139-5p    | 0.588140831  | 0.006381031 | 0.872691564  | 5.21E-07    |
| mir-103a-1-3p | mir-139-5p    | 0.588140831  | 0.006381031 | 0.872691564  | 5.21E-07    |
| mir-27b-3p    | mir-199a-1-5p | 0.524434102  | 0.017604806 | 0.848723937  | 2.24E-06    |
| mir-27b-3p    | mir-199a-2-5p | 0.524434102  | 0.017604806 | 0.848723937  | 2.24E-06    |
| mir-486-2-5p  | mir-30e-5p    | 0.846539264  | 2.53E-06    | 0.51916408   | 0.018988845 |
| mir-98-5p     | mir-146b-5p   | 0.663339167  | 0.001430953 | 0.899059921  | 7.13E-08    |
| mir-182-5p    | mir-140-5p    | 0.556708198  | 0.010787181 | -0.03973594  | 0.867899445 |
| mir-27b-3p    | let-7i-5p     | -0.072447039 | 0.761485818 | 0.533443789  | 0.01542639  |
| mir-30d-5p    | mir-374b-5p   | 0.617045368  | 0.003753022 | 0.882670854  | 2.59E-07    |
| mir-1307-3p   | cpeptide      | 0.203214173  | 0.390173723 | -0.430623389 | 0.058040463 |
| mir-92a-2-3p  | mir-139-5p    | -0.496838053 | 0.025844317 | -0.836820475 | 4.24E-06    |
| mir-139-5p    | mir-92a-1-3p  | -0.496838053 | 0.025844317 | -0.836820475 | 4.24E-06    |
| mir-194-2-5p  | mir-99b-5p    | -0.601275368 | 0.005044221 | -0.031830269 | 0.894022078 |
| mir-194-1-5p  | mir-99b-5p    | -0.601275368 | 0.005044221 | -0.031830269 | 0.894022078 |
| mir-182-5p    | mir-374b-5p   | 0.055777142  | 0.815324456 | -0.542150422 | 0.013532319 |
| mir-93-5p     | mir-28-3p     | -0.076969036 | 0.747050494 | -0.629174031 | 0.00295794  |
| mir-191-5p    | mir-99a-5p    | -0.166183894 | 0.483779934 | 0.458214477  | 0.042172832 |
| mir-182-5p    | let-7i-5p     | 0.378671112  | 0.099679996 | -0.257871431 | 0.272345612 |

|               |               |              |             |              |             |
|---------------|---------------|--------------|-------------|--------------|-------------|
| mir-1307-3p   | mir-151a-3p   | 0.233673517  | 0.321417895 | 0.716150035  | 0.00038308  |
| mir-22-3p     | mir-106b-3p   | 0.751954536  | 0.000131561 | 0.306047395  | 0.189414782 |
| let-7i-5p     | mir-629-5p    | 0.398910446  | 0.081459254 | -0.233812043 | 0.321122861 |
| mir-425-5p    | mir-629-5p    | 0.732604159  | 0.000239273 | 0.267291851  | 0.254587116 |
| mir-629-5p    | mir-28-3p     | -0.29877493  | 0.200687201 | -0.747995439 | 0.000149321 |
| mir-92a-2-3p  | mir-98-5p     | -0.429294382 | 0.058905259 | -0.807235603 | 1.69E-05    |
| mir-98-5p     | mir-92a-1-3p  | -0.429294382 | 0.058905259 | -0.807235603 | 1.69E-05    |
| mir-423-3p    | mir-122-5p    | -0.413838527 | 0.06969413  | 0.216300744  | 0.359693043 |
| mir-423-5p    | mir-484       | 0.922205238  | 7.46E-09    | 0.736988988  | 0.000209876 |
| mir-10b-5p    | let-7b-5p     | -0.217488193 | 0.356996868 | 0.412317855  | 0.070830596 |
| mir-92a-2-3p  | mir-181a-2-5p | -0.219874476 | 0.351613973 | -0.707741432 | 0.000481378 |
| mir-92a-2-3p  | mir-181a-1-5p | -0.219874476 | 0.351613973 | -0.707741432 | 0.000481378 |
| mir-181a-2-5p | mir-92a-1-3p  | -0.219874476 | 0.351613973 | -0.707741432 | 0.000481378 |
| mir-92a-1-3p  | mir-181a-1-5p | -0.219874476 | 0.351613973 | -0.707741432 | 0.000481378 |
| mir-182-5p    | mir-122-5p    | 0.048870184  | 0.837882217 | -0.543770971 | 0.01320143  |
| mir-181a-2-5p | mir-146b-5p   | 0.3362749    | 0.147156733 | 0.764646635  | 8.63E-05    |
| mir-146b-5p   | mir-181a-1-5p | 0.3362749    | 0.147156733 | 0.764646635  | 8.63E-05    |
| mir-106a-5p   | mir-28-3p     | -0.154182822 | 0.516320824 | -0.670914484 | 0.001203321 |
| mir-103a-2-3p | mir-146b-5p   | 0.389652697  | 0.089458877 | 0.788696564  | 3.60E-05    |
| mir-146b-5p   | mir-103a-1-3p | 0.389652697  | 0.089458877 | 0.788696564  | 3.60E-05    |
| mir-106a-5p   | mir-148a-3p   | 0.428664485  | 0.059318534 | -0.195513042 | 0.408759644 |
| mir-744-5p    | mir-199a-2-3p | 0.848407294  | 2.28E-06    | 0.956800757  | 4.25E-11    |
| mir-744-5p    | mir-199a-1-3p | 0.848407294  | 2.28E-06    | 0.956800757  | 4.25E-11    |
| mir-744-5p    | mir-199b-3p   | 0.848407294  | 2.28E-06    | 0.956800757  | 4.25E-11    |
| mir-21-5p     | mir-99a-5p    | -0.169682686 | 0.47448871  | 0.449931537  | 0.046533613 |
| mir-146b-5p   | mir-122-5p    | -0.087349286 | 0.714226224 | 0.513877543  | 0.020463103 |
| mir-584-5p    | mir-20b-5p    | -0.214852053 | 0.362998157 | -0.703115736 | 0.00054405  |
| mir-182-5p    | mir-126-5p    | 0.167811897  | 0.479445509 | -0.450313612 | 0.046325134 |
| mir-629-5p    | mir-186-5p    | 0.895602843  | 9.53E-08    | 0.661711179  | 0.001484302 |
| mir-1307-3p   | mir-221-3p    | 0.551145594  | 0.011777068 | 0.854793836  | 1.59E-06    |
| mir-10b-5p    | mir-106b-3p   | -0.185071386 | 0.434710797 | 0.435077733  | 0.055212105 |
| mir-361-5p    | mir-99a-5p    | -0.129635367 | 0.585942722 | 0.479382686  | 0.032456721 |
| mir-122-5p    | mir-221-3p    | -0.069862756 | 0.769770018 | 0.524317128  | 0.017634624 |
| mir-361-5p    | mir-122-5p    | -0.054022842 | 0.821041389 | 0.535653512  | 0.014926662 |
| mir-199a-1-5p | mir-151a-5p   | 0.434767833  | 0.055405418 | 0.806756264  | 1.73E-05    |
| mir-151a-5p   | mir-199a-2-5p | 0.434767833  | 0.055405418 | 0.806756264  | 1.73E-05    |
| mir-106a-5p   | norepi        | 0.049254831  | 0.836622608 | -0.537961805 | 0.014418624 |
| mir-148b-3p   | mir-15a-5p    | 0.308968956  | 0.185008866 | -0.319491579 | 0.169716004 |
| mir-486-2-5p  | mir-185-5p    | 0.950748446  | 1.35E-10    | 0.830330999  | 5.87E-06    |
| mir-146b-5p   | mir-99a-5p    | -0.089538438 | 0.707362847 | 0.508087537  | 0.022180809 |
| mir-423-3p    | mir-27a-3p    | -0.574940728 | 0.008004567 | -0.005138846 | 0.982845324 |
| mir-182-5p    | mir-744-5p    | -0.582520671 | 0.007035603 | -0.865590817 | 8.26E-07    |
| mir-22-3p     | mir-629-5p    | 0.789326163  | 3.51E-05    | 0.397989369  | 0.082230503 |
| mir-148a-3p   | let-7d-5p     | -0.452148553 | 0.045333888 | 0.159117475  | 0.502816346 |
| mir-629-5p    | mir-126-5p    | 0.172403961  | 0.467324687 | -0.441159917 | 0.051521039 |
| mir-361-5p    | mir-151a-3p   | 0.590987309  | 0.006069095 | 0.868485084  | 6.87E-07    |
| mir-199a-2-3p | mir-24-2-3p   | 0.772038099  | 6.67E-05    | 0.931878741  | 2.34E-09    |
| mir-199a-2-3p | mir-24-1-3p   | 0.772038099  | 6.67E-05    | 0.931878741  | 2.34E-09    |
| mir-24-2-3p   | mir-199a-1-3p | 0.772038099  | 6.67E-05    | 0.931878741  | 2.34E-09    |
| mir-24-2-3p   | mir-199b-3p   | 0.772038099  | 6.67E-05    | 0.931878741  | 2.34E-09    |
| mir-199a-1-3p | mir-24-1-3p   | 0.772038099  | 6.67E-05    | 0.931878741  | 2.34E-09    |
| mir-199b-3p   | mir-24-1-3p   | 0.772038099  | 6.67E-05    | 0.931878741  | 2.34E-09    |
| mir-103a-2-3p | mir-151a-3p   | 0.723012899  | 0.000316048 | 0.915500017  | 1.53E-08    |
| mir-103a-1-3p | mir-151a-3p   | 0.723012899  | 0.000316048 | 0.915500017  | 1.53E-08    |
| mir-340-5p    | mir-629-5p    | -0.267310921 | 0.254551933 | -0.725545466 | 0.000293979 |
| mir-182-5p    | mir-99a-5p    | 0.258843607  | 0.27047802  | -0.3628956   | 0.11581563  |
| mir-106b-3p   | mir-30e-5p    | 0.783410374  | 4.40E-05    | 0.388822115  | 0.090203817 |
| mir-363-3p    | norepi        | 0.025194278  | 0.916031829 | -0.550012082 | 0.011987521 |
| mir-181a-2-5p | mir-125b-1-5p | -0.150320063 | 0.52701031  | 0.454590334  | 0.04404023  |
| mir-181a-2-5p | mir-125b-2-5p | -0.150320063 | 0.52701031  | 0.454590334  | 0.04404023  |
| mir-125b-1-5p | mir-181a-1-5p | -0.150320063 | 0.52701031  | 0.454590334  | 0.04404023  |
| mir-125b-2-5p | mir-181a-1-5p | -0.150320063 | 0.52701031  | 0.454590334  | 0.04404023  |
| mir-425-5p    | mir-20b-5p    | 0.783930719  | 4.31E-05    | 0.392226938  | 0.087178804 |
| mir-30d-5p    | mir-125b-1-5p | -0.305768299 | 0.189839342 | 0.31397656   | 0.177619201 |

|               |               |              |             |              |             |
|---------------|---------------|--------------|-------------|--------------|-------------|
| mir-30d-5p    | mir-125b-2-5p | -0.305768299 | 0.189839342 | 0.31397656   | 0.177619201 |
| mir-191-5p    | mir-629-5p    | -0.246943139 | 0.293892434 | -0.712853556 | 0.000419356 |
| mir-7-3-5p    | mir-148b-3p   | 0.419024866  | 0.065920796 | -0.191868864 | 0.41771933  |
| mir-7-1-5p    | mir-148b-3p   | 0.419024866  | 0.065920796 | -0.191868864 | 0.41771933  |
| mir-148b-3p   | mir-7-2-5p    | 0.419024866  | 0.065920796 | -0.191868864 | 0.41771933  |
| mir-21-5p     | mir-139-5p    | 0.543484192  | 0.013259505 | 0.848242199  | 2.31E-06    |
| mir-629-5p    | mir-30e-5p    | 0.765016914  | 8.52E-05    | 0.352424826  | 0.127510946 |
| mir-182-5p    | mir-24-2-3p   | -0.252299813 | 0.283204024 | -0.715209131 | 0.000393151 |
| mir-182-5p    | mir-24-1-3p   | -0.252299813 | 0.283204024 | -0.715209131 | 0.000393151 |
| mir-98-5p     | mir-744-5p    | 0.632799697  | 0.002749527 | 0.88223344   | 2.68E-07    |
| mir-584-5p    | mir-1307-3p   | 0.219440484  | 0.352589445 | 0.697603502  | 0.000627653 |
| mir-24-2-3p   | mir-125b-1-5p | -0.128742201 | 0.588548899 | 0.468863793  | 0.037037994 |
| mir-24-2-3p   | mir-125b-2-5p | -0.128742201 | 0.588548899 | 0.468863793  | 0.037037994 |
| mir-125b-1-5p | mir-24-1-3p   | -0.128742201 | 0.588548899 | 0.468863793  | 0.037037994 |
| mir-24-1-3p   | mir-125b-2-5p | -0.128742201 | 0.588548899 | 0.468863793  | 0.037037994 |
| let-7i-5p     | mir-106b-3p   | 0.483350695  | 0.030848584 | -0.110105789 | 0.644001277 |
| mir-7-3-5p    | mir-194-2-5p  | 0.887485984  | 1.81E-07    | 0.648542882  | 0.00198073  |
| mir-7-3-5p    | mir-194-1-5p  | 0.887485984  | 1.81E-07    | 0.648542882  | 0.00198073  |
| mir-194-2-5p  | mir-7-1-5p    | 0.887485984  | 1.81E-07    | 0.648542882  | 0.00198073  |
| mir-194-2-5p  | mir-7-2-5p    | 0.887485984  | 1.81E-07    | 0.648542882  | 0.00198073  |
| mir-7-1-5p    | mir-194-1-5p  | 0.887485984  | 1.81E-07    | 0.648542882  | 0.00198073  |
| mir-194-1-5p  | mir-7-2-5p    | 0.887485984  | 1.81E-07    | 0.648542882  | 0.00198073  |
| mir-15a-5p    | norepi        | -0.035482875 | 0.881938134 | -0.586586496 | 0.006556844 |
| mir-320a      | mir-186-5p    | 0.928487639  | 3.58E-09    | 0.766054754  | 8.22E-05    |
| mir-181a-2-5p | mir-99a-5p    | -0.213691708 | 0.365657903 | 0.396426269  | 0.08355169  |
| mir-99a-5p    | mir-181a-1-5p | -0.213691708 | 0.365657903 | 0.396426269  | 0.08355169  |
| mir-21-5p     | mir-122-5p    | -0.184831587 | 0.435316791 | 0.421173485  | 0.064403433 |
| mir-629-5p    | let-7d-5p     | -0.362751476 | 0.115971183 | -0.768185867 | 7.63E-05    |
| mir-629-5p    | mir-20a-5p    | 0.872349758  | 5.33E-07    | 0.609581313  | 0.004324946 |
| mir-106a-5p   | mir-99a-5p    | 0.414710007  | 0.069049028 | -0.188853813 | 0.425211392 |
| mir-1307-3p   | mir-199a-2-3p | 0.419078598  | 0.065882525 | 0.792758512  | 3.07E-05    |
| mir-1307-3p   | mir-199a-1-3p | 0.419078598  | 0.065882525 | 0.792758512  | 3.07E-05    |
| mir-1307-3p   | mir-199b-3p   | 0.419078598  | 0.065882525 | 0.792758512  | 3.07E-05    |
| mir-15a-5p    | mir-28-3p     | -0.39289154  | 0.08659717  | -0.780758305 | 4.86E-05    |
| mir-629-5p    | mir-221-3p    | -0.551223482 | 0.011762718 | -0.848903744 | 2.22E-06    |
| mir-106a-5p   | mir-320a      | 0.932295817  | 2.22E-09    | 0.77950182   | 5.09E-05    |
| mir-26b-5p    | mir-25-3p     | 0.968947861  | 2.28E-12    | 0.894379781  | 1.05E-07    |
| mir-25-3p     | mir-148a-3p   | 0.330703418  | 0.154399417 | -0.279605087 | 0.232511729 |
| mir-106a-5p   | mir-151a-3p   | 0.047735669  | 0.841599639 | -0.52487796  | 0.017492026 |
| mir-144-3p    | mir-486-2-5p  | 0.942198604  | 5.54E-10    | 0.810172054  | 1.49E-05    |
| mir-139-5p    | let-7d-3p     | 0.642470171  | 0.002252597 | 0.883480914  | 2.45E-07    |
| mir-30c-1-5p  | mir-378a-3p   | -0.529120368 | 0.016442974 | 0.040051569  | 0.866859071 |
| mir-378a-3p   | mir-30c-2-5p  | -0.529120368 | 0.016442974 | 0.040051569  | 0.866859071 |
| mir-144-3p    | mir-199a-2-3p | -0.183257344 | 0.439306074 | -0.671948259 | 0.001174765 |
| mir-144-3p    | mir-199a-1-3p | -0.183257344 | 0.439306074 | -0.671948259 | 0.001174765 |
| mir-144-3p    | mir-199b-3p   | -0.183257344 | 0.439306074 | -0.671948259 | 0.001174765 |
| mir-26a-2-5p  | mir-28-3p     | 0.497829727  | 0.025503357 | 0.825970131  | 7.26E-06    |
| mir-28-3p     | mir-26a-1-5p  | 0.497829727  | 0.025503357 | 0.825970131  | 7.26E-06    |
| mir-182-5p    | mir-15a-5p    | 0.754571367  | 0.000120844 | 0.923490416  | 6.45E-09    |
| mir-10b-5p    | mir-199a-1-5p | 0.125211608  | 0.598898374 | -0.463385029 | 0.039615201 |
| mir-10b-5p    | mir-199a-2-5p | 0.125211608  | 0.598898374 | -0.463385029 | 0.039615201 |
| mir-192-5p    | mir-451a      | 0.897427079  | 8.18E-08    | 0.681490933  | 0.000937047 |
| mir-25-3p     | mir-425-5p    | 0.817182406  | 1.09E-05    | 0.479236494  | 0.032517197 |
| mir-423-5p    | mir-15b-5p    | 0.841309119  | 3.36E-06    | 0.536744471  | 0.014684786 |
| mir-181a-2-5p | mir-629-5p    | 0.088781123  | 0.709734736 | -0.49009997  | 0.028257347 |
| mir-629-5p    | mir-181a-1-5p | 0.088781123  | 0.709734736 | -0.49009997  | 0.028257347 |
| mir-199a-1-5p | mir-148b-3p   | 0.207553523  | 0.379911722 | 0.683225511  | 0.000898534 |
| mir-148b-3p   | mir-199a-2-5p | 0.207553523  | 0.379911722 | 0.683225511  | 0.000898534 |
| mir-25-3p     | mir-185-5p    | 0.964048984  | 8.36E-12    | 0.880023585  | 3.14E-07    |
| mir-103a-2-3p | mir-340-5p    | 0.646907623  | 0.002051082 | 0.884091051  | 2.34E-07    |
| mir-340-5p    | mir-103a-1-3p | 0.646907623  | 0.002051082 | 0.884091051  | 2.34E-07    |
| mir-143-3p    | mir-28-3p     | -0.054745193 | 0.818686312 | 0.514708596  | 0.0202255   |
| mir-182-5p    | mir-21-5p     | -0.439419989 | 0.0525571   | -0.798772675 | 2.41E-05    |
| mir-744-5p    | mir-23a-3p    | 0.547356451  | 0.012492504 | 0.844447126  | 2.84E-06    |



|               |               |              |             |              |             |
|---------------|---------------|--------------|-------------|--------------|-------------|
| mir-148a-3p   | let-7b-5p     | 0.318378095  | 0.171291902 | -0.283674595 | 0.225497879 |
| mir-629-5p    | mir-484       | 0.728065377  | 0.000273339 | 0.295052074  | 0.206627161 |
| mir-451a      | mir-148b-3p   | 0.38268182   | 0.095853051 | -0.213878259 | 0.365229542 |
| let-7i-5p     | cpeptide      | -0.639201118 | 0.002411409 | -0.135779456 | 0.568149127 |
| mir-106b-3p   | mir-28-3p     | -0.278947214 | 0.233658707 | -0.719061562 | 0.000353297 |
| mir-22-3p     | mir-20b-5p    | 0.822568563  | 8.52E-06    | 0.497607775  | 0.025579358 |
| mir-181a-2-5p | mir-148a-3p   | -0.325951341 | 0.160769399 | 0.273084973  | 0.244041001 |
| mir-148a-3p   | mir-181a-1-5p | -0.325951341 | 0.160769399 | 0.273084973  | 0.244041001 |
| mir-26b-5p    | mir-148b-3p   | 0.567736604  | 0.009023934 | 0.026561367  | 0.911492241 |
| mir-92a-2-3p  | mir-148a-3p   | 0.320927266  | 0.167698793 | -0.277210773 | 0.236703703 |
| mir-148a-3p   | mir-92a-1-3p  | 0.320927266  | 0.167698793 | -0.277210773 | 0.236703703 |
| mir-182-5p    | mir-26a-2-5p  | -0.377515087 | 0.100803427 | -0.767459649 | 7.83E-05    |
| mir-182-5p    | mir-26a-1-5p  | -0.377515087 | 0.100803427 | -0.767459649 | 7.83E-05    |
| mir-25-3p     | mir-28-3p     | -0.173797947 | 0.463676234 | -0.659757555 | 0.001550564 |
| mir-139-5p    | mir-10a-5p    | 0.160933198  | 0.497890671 | 0.651338723  | 0.001865125 |
| mir-98-5p     | mir-20b-5p    | -0.017339204 | 0.942159958 | -0.559742346 | 0.010276377 |
| mir-98-5p     | mir-122-5p    | -0.288174226 | 0.217905061 | 0.308074332  | 0.186350593 |
| mir-125b-1-5p | mir-139-5p    | -0.142898115 | 0.547834171 | 0.43859619   | 0.053053153 |
| mir-139-5p    | mir-125b-2-5p | -0.142898115 | 0.547834171 | 0.43859619   | 0.053053153 |
| mir-106b-3p   | mir-484       | 0.72381594   | 0.000308902 | 0.292809002  | 0.210261776 |
| mir-340-5p    | mir-122-5p    | -0.333066755 | 0.151297588 | 0.261070367  | 0.266230627 |
| mir-139-5p    | mir-126-5p    | 0.475084869  | 0.034271698 | 0.811009788  | 1.44E-05    |
| mir-26a-2-5p  | mir-148b-3p   | 0.402895896  | 0.078183773 | 0.777877581  | 5.40E-05    |
| mir-148b-3p   | mir-26a-1-5p  | 0.402895896  | 0.078183773 | 0.777877581  | 5.40E-05    |
| mir-126-3p    | mir-199a-2-3p | 0.749528517  | 0.000142214 | 0.919297241  | 1.03E-08    |
| mir-126-3p    | mir-199a-1-3p | 0.749528517  | 0.000142214 | 0.919297241  | 1.03E-08    |
| mir-126-3p    | mir-199b-3p   | 0.749528517  | 0.000142214 | 0.919297241  | 1.03E-08    |
| mir-30c-1-5p  | mir-126-5p    | 0.480789718  | 0.031879156 | 0.813225624  | 1.30E-05    |
| mir-126-5p    | mir-30c-2-5p  | 0.480789718  | 0.031879156 | 0.813225624  | 1.30E-05    |
| mir-182-5p    | let-7d-5p     | -0.361255182 | 0.117595003 | -0.757655247 | 0.000109185 |
| mir-146a-5p   | mir-125b-1-5p | -0.170482811 | 0.472376602 | 0.413682302  | 0.06981025  |
| mir-146a-5p   | mir-125b-2-5p | -0.170482811 | 0.472376602 | 0.413682302  | 0.06981025  |
| mir-103a-2-3p | let-7b-5p     | 0.159587869  | 0.501538011 | -0.422685655 | 0.063351422 |
| mir-103a-1-3p | let-7b-5p     | 0.159587869  | 0.501538011 | -0.422685655 | 0.063351422 |
| mir-629-5p    | mir-139-5p    | -0.171314121 | 0.470187198 | -0.655385819 | 0.001707828 |
| mir-126-5p    | mir-20b-5p    | 0.347705218  | 0.133047726 | -0.243786244 | 0.300305663 |
| mir-103a-2-3p | mir-93-5p     | 0.420727953  | 0.064715885 | -0.161458907 | 0.49646893  |
| mir-103a-1-3p | mir-93-5p     | 0.420727953  | 0.064715885 | -0.161458907 | 0.49646893  |
| mir-151a-5p   | mir-99a-5p    | -0.56449662  | 0.009515625 | -0.02801955  | 0.906653078 |
| mir-192-5p    | let-7b-5p     | 0.87183511   | 5.51E-07    | 0.622796975  | 0.003356381 |
| mir-22-3p     | mir-15a-5p    | 0.741874437  | 0.000180814 | 0.330642505  | 0.154479943 |
| let-7f-2-5p   | mir-148a-3p   | -0.325384526 | 0.161541116 | 0.266702708  | 0.255675592 |
| mir-148a-3p   | let-7f-1-5p   | -0.325384526 | 0.161541116 | 0.266702708  | 0.255675592 |
| mir-223-3p    | mir-99a-5p    | -0.19546121  | 0.408886342 | 0.390825136  | 0.088415042 |
| mir-148b-3p   | mir-374b-5p   | 0.476171387  | 0.033805558 | 0.810593496  | 1.46E-05    |
| mir-199a-1-5p | mir-99b-5p    | 0.70697391   | 0.00049133  | 0.264574396  | 0.259632349 |
| mir-99b-5p    | mir-199a-2-5p | 0.70697391   | 0.00049133  | 0.264574396  | 0.259632349 |
| mir-106b-3p   | mir-15b-5p    | 0.531347903  | 0.015912705 | -0.017570614 | 0.941389286 |
| mir-182-5p    | let-7a-3-5p   | -0.307150448 | 0.187743082 | -0.728983854 | 0.00026613  |
| mir-182-5p    | let-7a-2-5p   | -0.307150448 | 0.187743082 | -0.728983854 | 0.00026613  |
| mir-182-5p    | let-7a-1-5p   | -0.307150448 | 0.187743082 | -0.728983854 | 0.00026613  |
| mir-98-5p     | let-7d-3p     | 0.830757087  | 5.75E-06    | 0.946763035  | 2.69E-10    |
| mir-106b-3p   | norepi        | 0.107488237  | 0.65194585  | -0.46282115  | 0.039888136 |
| mir-26a-2-5p  | mir-151a-3p   | 0.670922729  | 0.001203091 | 0.889749215  | 1.52E-07    |
| mir-151a-3p   | mir-26a-1-5p  | 0.670922729  | 0.001203091 | 0.889749215  | 1.52E-07    |
| mir-320a      | mir-20a-5p    | 0.964862133  | 6.83E-12    | 0.886160476  | 2.00E-07    |
| mir-98-5p     | mir-146a-5p   | 0.809535142  | 1.53E-05    | 0.939451984  | 8.33E-10    |
| let-7a-3-5p   | mir-10a-5p    | 0.316988344  | 0.173272796 | 0.733335711  | 0.000234137 |
| let-7a-2-5p   | mir-10a-5p    | 0.316988344  | 0.173272796 | 0.733335711  | 0.000234137 |
| let-7a-1-5p   | mir-10a-5p    | 0.316988344  | 0.173272796 | 0.733335711  | 0.000234137 |
| mir-191-5p    | mir-15a-5p    | -0.447538861 | 0.047855611 | -0.796553796 | 2.64E-05    |
| mir-182-5p    | let-7g-5p     | 0.578756978  | 0.007503949 | 0.053230729  | 0.823625602 |
| mir-26a-2-5p  | let-7d-3p     | 0.957308527  | 3.83E-11    | 0.863214531  | 9.59E-07    |
| let-7d-3p     | mir-26a-1-5p  | 0.957308527  | 3.83E-11    | 0.863214531  | 9.59E-07    |

|               |               |              |             |              |             |
|---------------|---------------|--------------|-------------|--------------|-------------|
| mir-30c-1-5p  | mir-10a-5p    | 0.107935795  | 0.65058487  | 0.613916252  | 0.003984635 |
| mir-10a-5p    | mir-30c-2-5p  | 0.107935795  | 0.65058487  | 0.613916252  | 0.003984635 |
| mir-584-5p    | mir-122-5p    | -0.495139863 | 0.02643654  | 0.063180096  | 0.791301613 |
| mir-223-3p    | mir-28-3p     | 0.277069252  | 0.236952996 | 0.711335042  | 0.000437025 |
| mir-125b-1-5p | norepi        | -0.252254733 | 0.283292956 | 0.3340961    | 0.149960248 |
| mir-125b-2-5p | norepi        | -0.252254733 | 0.283292956 | 0.3340961    | 0.149960248 |
| mir-98-5p     | mir-139-5p    | 0.49548561   | 0.026315106 | 0.817195007  | 1.09E-05    |
| mir-103a-2-3p | mir-25-3p     | 0.306070107  | 0.189380261 | -0.28101548  | 0.230065077 |
| mir-25-3p     | mir-103a-1-3p | 0.306070107  | 0.189380261 | -0.28101548  | 0.230065077 |
| mir-182-5p    | mir-28-5p     | -0.194808702 | 0.410483152 | -0.665316903 | 0.001368296 |
| mir-151a-5p   | mir-27a-3p    | -0.381163465 | 0.097288985 | 0.200502817  | 0.396663041 |
| mir-26a-2-5p  | mir-122-5p    | -0.245369528 | 0.297078651 | 0.339293818  | 0.143333017 |
| mir-122-5p    | mir-26a-1-5p  | -0.245369528 | 0.297078651 | 0.339293818  | 0.143333017 |
| mir-30d-5p    | mir-99a-5p    | -0.262551886 | 0.263428102 | 0.321317157  | 0.16715383  |
| mir-182-5p    | mir-425-5p    | 0.668135247  | 0.001283005 | 0.2030664    | 0.390525874 |
| mir-26a-2-5p  | mir-126-5p    | 0.515109158  | 0.020111765 | 0.824573633  | 7.76E-06    |
| mir-126-5p    | mir-26a-1-5p  | 0.515109158  | 0.020111765 | 0.824573633  | 7.76E-06    |
| mir-27b-3p    | mir-486-2-5p  | -0.315287668 | 0.175718078 | -0.729507812 | 0.000262091 |
| mir-181a-2-5p | mir-23a-3p    | 0.489249305  | 0.028574169 | 0.813094831  | 1.31E-05    |
| mir-23a-3p    | mir-181a-1-5p | 0.489249305  | 0.028574169 | 0.813094831  | 1.31E-05    |
| mir-27a-3p    | let-7g-5p     | 0.255913722  | 0.276130854 | 0.697223677  | 0.000633794 |
| mir-361-5p    | mir-146b-5p   | 0.761320038  | 9.66E-05    | 0.921518963  | 8.05E-09    |
| let-7f-2-5p   | mir-122-5p    | -0.229430363 | 0.330533242 | 0.350111016  | 0.130204538 |
| mir-122-5p    | let-7f-1-5p   | -0.229430363 | 0.330533242 | 0.350111016  | 0.130204538 |
| mir-423-5p    | mir-375       | -0.138265286 | 0.56101787  | 0.430075695  | 0.058395678 |
| mir-192-5p    | mir-107       | 0.871293816  | 5.72E-07    | 0.628982399  | 0.002969311 |
| mir-199a-2-3p | mir-20b-5p    | -0.137681416 | 0.562689292 | -0.626456271 | 0.003122642 |
| mir-199a-1-3p | mir-20b-5p    | -0.137681416 | 0.562689292 | -0.626456271 | 0.003122642 |
| mir-199b-3p   | mir-20b-5p    | -0.137681416 | 0.562689292 | -0.626456271 | 0.003122642 |
| mir-21-5p     | let-7d-3p     | 0.949893404  | 1.58E-10    | 0.843722885  | 2.95E-06    |
| mir-125b-1-5p | mir-23a-3p    | -0.045428329 | 0.849169894 | 0.501419867  | 0.024298586 |
| mir-23a-3p    | mir-125b-2-5p | -0.045428329 | 0.849169894 | 0.501419867  | 0.024298586 |
| mir-146b-5p   | mir-24-2-3p   | 0.635318062  | 0.002612083 | 0.873329024  | 4.99E-07    |
| mir-146b-5p   | mir-24-1-3p   | 0.635318062  | 0.002612083 | 0.873329024  | 4.99E-07    |
| mir-122-5p    | mir-24-2-3p   | 0.028134555  | 0.90627155  | 0.554169076  | 0.011230301 |
| mir-122-5p    | mir-24-1-3p   | 0.028134555  | 0.90627155  | 0.554169076  | 0.011230301 |
| mir-126-3p    | mir-10b-5p    | 0.470654834  | 0.036224394 | -0.085056337 | 0.721437738 |
| mir-126-3p    | let-7f-2-5p   | 0.739479455  | 0.000194598 | 0.912970317  | 1.98E-08    |
| mir-126-3p    | let-7f-1-5p   | 0.739479455  | 0.000194598 | 0.912970317  | 1.98E-08    |
| mir-151a-5p   | mir-128-1-3p  | 0.087653627  | 0.713270783 | 0.593802349  | 0.005773035 |
| mir-151a-5p   | mir-128-2-3p  | 0.087653627  | 0.713270783 | 0.593802349  | 0.005773035 |
| mir-146a-5p   | mir-122-5p    | -0.139530662 | 0.557403088 | 0.426125697  | 0.061006536 |
| mir-99a-5p    | norepi        | -0.400659567 | 0.080009433 | 0.168789625  | 0.476851729 |
| mir-151a-3p   | mir-106b-3p   | -0.039047772 | 0.87016851  | -0.560444131 | 0.010161074 |
| mir-122-5p    | norepi        | -0.468595955 | 0.037160873 | 0.084949322  | 0.721774868 |
| mir-27b-3p    | mir-30d-5p    | 0.238567297  | 0.311093225 | 0.683899266  | 0.000883939 |
| mir-143-3p    | mir-30c-1-5p  | -0.222331424 | 0.346121073 | 0.351386113  | 0.128715207 |
| mir-143-3p    | mir-30c-2-5p  | -0.222331424 | 0.346121073 | 0.351386113  | 0.128715207 |
| let-7d-5p     | mir-15a-5p    | -0.494901985 | 0.026520345 | -0.812782033 | 1.33E-05    |
| mir-7-3-5p    | norepi        | 0.083256715  | 0.727113628 | -0.469071505 | 0.036942917 |
| mir-7-1-5p    | norepi        | 0.083256715  | 0.727113628 | -0.469071505 | 0.036942917 |
| mir-7-2-5p    | norepi        | 0.083256715  | 0.727113628 | -0.469071505 | 0.036942917 |
| mir-17-5p     | mir-629-5p    | 0.753034498  | 0.000127043 | 0.369451306  | 0.108897417 |
| mir-148a-3p   | mir-126-5p    | -0.181077486 | 0.444861562 | 0.386443664  | 0.092362238 |
| mir-125a-5p   | mir-194-2-5p  | -0.619027681 | 0.003612153 | -0.13224649  | 0.578351931 |
| mir-125a-5p   | mir-194-1-5p  | -0.619027681 | 0.003612153 | -0.13224649  | 0.578351931 |
| let-7a-3-5p   | mir-629-5p    | -0.369502191 | 0.108844914 | -0.752001444 | 0.000131362 |
| let-7a-2-5p   | mir-629-5p    | -0.369502191 | 0.108844914 | -0.752001444 | 0.000131362 |
| let-7a-1-5p   | mir-629-5p    | -0.369502191 | 0.108844914 | -0.752001444 | 0.000131362 |
| mir-106b-3p   | mir-126-5p    | 0.118312531  | 0.619336027 | -0.438736888 | 0.05296818  |
| mir-25-3p     | mir-30e-5p    | 0.864604812  | 8.79E-07    | 0.618429067  | 0.003654222 |
| mir-98-5p     | mir-144-3p    | 0.006641401  | 0.977830485 | -0.523802717 | 0.017766235 |
| mir-182-5p    | mir-361-5p    | -0.555885483 | 0.010929178 | -0.838096591 | 3.97E-06    |
| mir-22-3p     | mir-182-5p    | 0.745205103  | 0.000163038 | 0.35828088   | 0.120871073 |

|               |               |              |             |              |             |
|---------------|---------------|--------------|-------------|--------------|-------------|
| mir-340-5p    | mir-125b-1-5p | -0.368186938 | 0.110207868 | 0.198044271  | 0.402598368 |
| mir-340-5p    | mir-125b-2-5p | -0.368186938 | 0.110207868 | 0.198044271  | 0.402598368 |
| mir-24-2-3p   | mir-99a-5p    | 0.106172405  | 0.655953296 | 0.600181382  | 0.005145904 |
| mir-99a-5p    | mir-24-1-3p   | 0.106172405  | 0.655953296 | 0.600181382  | 0.005145904 |
| mir-584-5p    | mir-15a-5p    | -0.325136707 | 0.161879321 | -0.727882943 | 0.00027479  |
| mir-27b-3p    | mir-106b-3p   | -0.374564339 | 0.103712716 | -0.753262039 | 0.000126108 |
| mir-101-1-3p  | mir-122-5p    | 0.161069802  | 0.497521045 | -0.4004405   | 0.080189958 |
| mir-122-5p    | mir-101-2-3p  | 0.161069802  | 0.497521045 | -0.4004405   | 0.080189958 |
| let-7b-5p     | norepi        | 0.102866894  | 0.666060232 | -0.448914584 | 0.047092025 |
| mir-10b-5p    | mir-486-2-5p  | -0.116599295 | 0.624454008 | 0.437364065  | 0.053801736 |
| mir-148a-3p   | mir-99a-5p    | 0.745589584  | 0.000161086 | 0.360127288  | 0.118829751 |
| let-7i-5p     | mir-486-2-5p  | 0.510022439  | 0.021594515 | -0.023061522 | 0.923118857 |
| let-7g-5p     | cpeptide      | -0.47263676  | 0.035340364 | 0.071770314  | 0.76365276  |
| mir-22-3p     | mir-484       | 0.807603778  | 1.67E-05    | 0.936018723  | 1.35E-09    |
| mir-181a-2-5p | mir-15a-5p    | -0.090587575 | 0.704081267 | -0.588625335 | 0.006327026 |
| mir-15a-5p    | mir-181a-1-5p | -0.090587575 | 0.704081267 | -0.588625335 | 0.006327026 |
| mir-222-3p    | mir-107       | 0.785365753  | 4.09E-05    | 0.927988098  | 3.80E-09    |
| mir-7-3-5p    | mir-425-5p    | 0.766757586  | 8.02E-05    | 0.403903707  | 0.077371231 |
| mir-425-5p    | mir-7-1-5p    | 0.766757586  | 8.02E-05    | 0.403903707  | 0.077371231 |
| mir-425-5p    | mir-7-2-5p    | 0.766757586  | 8.02E-05    | 0.403903707  | 0.077371231 |
| let-7i-5p     | mir-375       | -0.375890316 | 0.102397926 | 0.186609023  | 0.430835656 |
| mir-7-3-5p    | mir-148a-3p   | 0.333658974  | 0.150527159 | -0.232671869 | 0.323556027 |
| mir-7-1-5p    | mir-148a-3p   | 0.333658974  | 0.150527159 | -0.232671869 | 0.323556027 |
| mir-148a-3p   | mir-7-2-5p    | 0.333658974  | 0.150527159 | -0.232671869 | 0.323556027 |
| mir-182-5p    | let-7f-2-5p   | -0.407832345 | 0.074263676 | -0.768614276 | 7.52E-05    |
| mir-182-5p    | let-7f-1-5p   | -0.407832345 | 0.074263676 | -0.768614276 | 7.52E-05    |
| mir-16-2-5p   | mir-148b-3p   | 0.483940655  | 0.030614918 | -0.05537027  | 0.816649588 |
| mir-148b-3p   | mir-16-1-5p   | 0.483940655  | 0.030614918 | -0.05537027  | 0.816649588 |
| mir-26b-5p    | norepi        | 0.171793381  | 0.468927312 | -0.388451712 | 0.090537494 |
| mir-106b-3p   | mir-185-5p    | 0.90983743   | 2.69E-08    | 0.736930059  | 0.000210249 |
| mir-182-5p    | mir-340-5p    | -0.291919741 | 0.211714337 | -0.70808311  | 0.000477003 |
| let-7i-5p     | mir-125b-1-5p | -0.197046057 | 0.405022024 | 0.365269024  | 0.113275494 |
| let-7i-5p     | mir-125b-2-5p | -0.197046057 | 0.405022024 | 0.365269024  | 0.113275494 |
| mir-17-5p     | mir-106b-3p   | 0.76432416   | 8.72E-05    | 0.400304158  | 0.080302465 |
| mir-106a-5p   | mir-194-2-5p  | 0.843439615  | 3.00E-06    | 0.572067089  | 0.008399264 |
| mir-106a-5p   | mir-194-1-5p  | 0.843439615  | 3.00E-06    | 0.572067089  | 0.008399264 |
| mir-126-3p    | mir-28-5p     | 0.745916612  | 0.000159442 | 0.913088382  | 1.95E-08    |
| mir-423-3p    | mir-374b-5p   | 0.476758843  | 0.033555596 | 0.800651073  | 2.23E-05    |
| mir-21-5p     | mir-1307-3p   | 0.368048494  | 0.110352045 | 0.747708849  | 0.000150682 |
| mir-27b-3p    | mir-3615      | -0.277467743 | 0.236251475 | -0.699427492 | 0.000598861 |
| mir-423-3p    | mir-629-5p    | -0.379694787 | 0.09869282  | -0.75341196  | 0.000125496 |
| mir-27b-3p    | mir-106a-5p   | -0.208982332 | 0.37656628  | -0.660084601 | 0.001539305 |
| mir-92a-2-3p  | norepi        | -0.109859845 | 0.64474618  | -0.598409888 | 0.005314141 |
| mir-92a-1-3p  | norepi        | -0.109859845 | 0.64474618  | -0.598409888 | 0.005314141 |
| mir-22-3p     | mir-486-2-5p  | 0.779716528  | 5.05E-05    | 0.433680893  | 0.056087513 |
| mir-103a-2-3p | mir-7-3-5p    | 0.255162279  | 0.277592434 | -0.308792286 | 0.185273311 |
| mir-103a-2-3p | mir-7-1-5p    | 0.255162279  | 0.277592434 | -0.308792286 | 0.185273311 |
| mir-103a-2-3p | mir-7-2-5p    | 0.255162279  | 0.277592434 | -0.308792286 | 0.185273311 |
| mir-7-3-5p    | mir-103a-1-3p | 0.255162279  | 0.277592434 | -0.308792286 | 0.185273311 |
| mir-103a-1-3p | mir-7-1-5p    | 0.255162279  | 0.277592434 | -0.308792286 | 0.185273311 |
| mir-103a-1-3p | mir-7-2-5p    | 0.255162279  | 0.277592434 | -0.308792286 | 0.185273311 |
| mir-98-5p     | mir-1307-3p   | 0.199675701  | 0.398654423 | 0.654155377  | 0.001754428 |
| mir-182-5p    | mir-15b-5p    | 0.522906591  | 0.017997383 | 0.000267887  | 0.999105667 |
| mir-182-5p    | mir-423-3p    | -0.346100491 | 0.134968436 | -0.735435533 | 0.000219915 |
| mir-21-5p     | mir-99b-5p    | 0.847402137  | 2.42E-06    | 0.583303075  | 0.006941315 |
| mir-340-5p    | mir-374b-5p   | 0.694454917  | 0.000680116 | 0.892853999  | 1.19E-07    |
| mir-139-5p    | cpeptide      | 0.158165491  | 0.505408247 | -0.396571073 | 0.083428641 |
| mir-148a-3p   | mir-15a-5p    | 0.340263474  | 0.142119778 | -0.220898285 | 0.349318984 |
| mir-122-5p    | mir-30c-1-5p  | -0.290609731 | 0.213866211 | 0.272251869  | 0.245540094 |
| mir-122-5p    | mir-30c-2-5p  | -0.290609731 | 0.213866211 | 0.272251869  | 0.245540094 |
| let-7i-5p     | mir-1307-3p   | -0.360533404 | 0.118384095 | 0.19815035   | 0.402341277 |
| mir-27b-3p    | mir-30c-1-5p  | 0.432843659  | 0.056617246 | 0.778532047  | 5.27E-05    |
| mir-27b-3p    | mir-30c-2-5p  | 0.432843659  | 0.056617246 | 0.778532047  | 5.27E-05    |
| mir-543       | let-7d-3p     | 0.801283465  | 2.17E-05    | 0.480839726  | 0.031858778 |

|               |               |              |             |              |             |
|---------------|---------------|--------------|-------------|--------------|-------------|
| mir-99b-5p    | mir-375       | 0.095777575  | 0.687922491 | 0.587627108  | 0.006438705 |
| mir-151a-3p   | mir-28-5p     | 0.579104717  | 0.007459635 | 0.84505736   | 2.75E-06    |
| let-7b-5p     | mir-28-3p     | -0.353954708 | 0.125751844 | -0.73859162  | 0.000199931 |
| mir-122-5p    | mir-191-5p    | -0.15463913  | 0.5150649   | 0.397915953  | 0.082292208 |
| let-7d-5p     | mir-375       | -0.265517452 | 0.257874356 | 0.295627494  | 0.205701525 |
| mir-146a-5p   | mir-20b-5p    | -0.228265007 | 0.333063192 | -0.669013241 | 0.001257366 |
| mir-101-1-3p  | mir-451a      | 0.962240308  | 1.29E-11    | 0.885169354  | 2.16E-07    |
| mir-451a      | mir-101-2-3p  | 0.962240308  | 1.29E-11    | 0.885169354  | 2.16E-07    |
| mir-484       | mir-20b-5p    | 0.803556587  | 1.98E-05    | 0.487476034  | 0.029243583 |
| mir-423-3p    | mir-223-3p    | 0.465695699  | 0.038511844 | 0.793266202  | 3.01E-05    |
| mir-146a-5p   | mir-144-3p    | -0.256530605 | 0.274934588 | -0.68467869  | 0.000867306 |
| mir-106a-5p   | mir-378a-3p   | 0.861450009  | 1.07E-06    | 0.619442299  | 0.003583251 |
| mir-192-5p    | mir-15a-5p    | 0.776516206  | 5.68E-05    | 0.43175599   | 0.057311102 |
| mir-144-3p    | mir-122-5p    | 0.098806361  | 0.678551838 | -0.442277472 | 0.050863855 |
| mir-1307-3p   | mir-744-5p    | 0.466346021  | 0.038205654 | 0.792928189  | 3.05E-05    |
| mir-30c-1-5p  | mir-221-3p    | 0.890863365  | 1.40E-07    | 0.692673308  | 0.000711413 |
| mir-221-3p    | mir-30c-2-5p  | 0.890863365  | 1.40E-07    | 0.692673308  | 0.000711413 |
| mir-182-5p    | mir-92a-2-3p  | 0.584691624  | 0.00677653  | 0.846184977  | 2.58E-06    |
| mir-182-5p    | mir-92a-1-3p  | 0.584691624  | 0.00677653  | 0.846184977  | 2.58E-06    |
| mir-103a-2-3p | mir-126-5p    | 0.632364468  | 0.002773879 | 0.866322849  | 7.89E-07    |
| mir-103a-1-3p | mir-126-5p    | 0.632364468  | 0.002773879 | 0.866322849  | 7.89E-07    |
| mir-122-5p    | let-7d-3p     | -0.169070372 | 0.476108246 | 0.381535948  | 0.096935277 |
| mir-28-3p     | mir-363-3p    | -0.250993381 | 0.285788318 | -0.679912061 | 0.000973305 |
| mir-182-5p    | mir-17-5p     | 0.760326034  | 9.99E-05    | 0.400787571  | 0.079904089 |
| let-7a-3-5p   | mir-148a-3p   | -0.411521144 | 0.071431524 | 0.134080932  | 0.573044445 |
| let-7a-2-5p   | mir-148a-3p   | -0.411521144 | 0.071431524 | 0.134080932  | 0.573044445 |
| let-7a-1-5p   | mir-148a-3p   | -0.411521144 | 0.071431524 | 0.134080932  | 0.573044445 |
| mir-181b-2-5p | mir-451a      | 0.575024871  | 0.007993243 | 0.082528993  | 0.729412724 |
| mir-181b-1-5p | mir-451a      | 0.575024871  | 0.007993243 | 0.082528993  | 0.729412724 |
| mir-1307-3p   | mir-223-3p    | 0.137641687  | 0.562803101 | 0.611177491  | 0.004196949 |
| mir-19b-2-3p  | mir-20b-5p    | 0.945053432  | 3.55E-10    | 0.837282132  | 4.14E-06    |
| mir-19b-1-3p  | mir-20b-5p    | 0.945053432  | 3.55E-10    | 0.837282132  | 4.14E-06    |
| mir-192-5p    | mir-106b-3p   | 0.845073616  | 2.74E-06    | 0.583379531  | 0.006932157 |
| mir-451a      | mir-122-5p    | 0.196178496  | 0.407134912 | -0.355906319 | 0.123532982 |
| mir-30e-5p    | mir-20b-5p    | 0.827879259  | 6.62E-06    | 0.544586329  | 0.013037433 |
| mir-148a-3p   | mir-148b-3p   | 0.119549141  | 0.615652314 | 0.598412276  | 0.005313911 |
| mir-425-5p    | mir-486-2-5p  | 0.747317573  | 0.000152559 | 0.377426363  | 0.100890029 |
| mir-3615      | mir-148a-3p   | 0.407459092  | 0.074554849 | -0.136167178 | 0.56703424  |
| mir-199a-1-5p | mir-150-5p    | 0.070825016  | 0.76668253  | -0.46086616  | 0.040845708 |
| mir-150-5p    | mir-199a-2-5p | 0.070825016  | 0.76668253  | -0.46086616  | 0.040845708 |
| mir-7-3-5p    | mir-99a-5p    | 0.363731086  | 0.11491684  | -0.185234353 | 0.434299221 |
| mir-7-1-5p    | mir-99a-5p    | 0.363731086  | 0.11491684  | -0.185234353 | 0.434299221 |
| mir-7-2-5p    | mir-99a-5p    | 0.363731086  | 0.11491684  | -0.185234353 | 0.434299221 |
| mir-150-5p    | mir-20b-5p    | 0.031422638  | 0.895372092 | 0.537032236  | 0.014621514 |
| mir-99b-5p    | norepi        | 0.141695715  | 0.551242365 | 0.611246334  | 0.0041915   |
| mir-148b-3p   | mir-28-5p     | 0.135652793  | 0.56851355  | 0.607211552  | 0.004520915 |
| mir-151a-5p   | mir-126-5p    | 0.411230121  | 0.07165198  | 0.763718067  | 8.91E-05    |
| mir-151a-3p   | mir-486-2-5p  | 0.044447243  | 0.852392677 | -0.480068024 | 0.032174387 |
| mir-425-5p    | mir-93-5p     | 0.882537701  | 2.62E-07    | 0.674894271  | 0.001096498 |
| mir-744-5p    | mir-148a-3p   | -0.446808946 | 0.048264583 | 0.086375923  | 0.717284723 |
| mir-15a-5p    | mir-30e-5p    | 0.716546406  | 0.000378904 | 0.321738923  | 0.166565683 |
| mir-126-3p    | mir-148a-3p   | -0.156136309 | 0.510954332 | 0.387841715  | 0.091088983 |
| mir-21-5p     | mir-125a-5p   | 0.850730065  | 2.01E-06    | 0.600128102  | 0.0051509   |
| mir-584-5p    | mir-148a-3p   | -0.526096872 | 0.017185284 | -0.019401827 | 0.93529254  |
| mir-101-1-3p  | norepi        | 0.086106851  | 0.718130933 | -0.444935769 | 0.049326395 |
| mir-101-2-3p  | norepi        | 0.086106851  | 0.718130933 | -0.444935769 | 0.049326395 |
| mir-16-2-5p   | mir-28-3p     | -0.248277168 | 0.291207786 | -0.673862666 | 0.001123389 |
| mir-16-1-5p   | mir-28-3p     | -0.248277168 | 0.291207786 | -0.673862666 | 0.001123389 |
| mir-146a-5p   | mir-1307-3p   | 0.504909835  | 0.023171103 | 0.807451775  | 1.68E-05    |
| mir-148a-3p   | mir-320a      | 0.301026615  | 0.197150371 | -0.247836101 | 0.292093733 |
| mir-361-5p    | mir-98-5p     | 0.564799737  | 0.009468721 | 0.834732387  | 4.72E-06    |
| mir-199a-2-3p | mir-148a-3p   | -0.384888399 | 0.093793958 | 0.156262022  | 0.510609895 |
| mir-148a-3p   | mir-199a-1-3p | -0.384888399 | 0.093793958 | 0.156262022  | 0.510609895 |
| mir-148a-3p   | mir-199b-3p   | -0.384888399 | 0.093793958 | 0.156262022  | 0.510609895 |

|               |               |              |             |              |             |
|---------------|---------------|--------------|-------------|--------------|-------------|
| mir-584-5p    | mir-23a-3p    | 0.35445679   | 0.125178319 | 0.732369225  | 0.000240943 |
| mir-20a-5p    | mir-20b-5p    | 0.921482518  | 8.08E-09    | 0.776118931  | 5.76E-05    |
| mir-182-5p    | mir-23a-3p    | -0.323318619 | 0.164375454 | -0.715548584 | 0.000389492 |
| mir-146b-5p   | mir-744-5p    | 0.762951348  | 9.14E-05    | 0.916382469  | 1.40E-08    |
| mir-101-1-3p  | mir-148b-3p   | 0.55336581   | 0.011373516 | 0.060920627  | 0.798615522 |
| mir-148b-3p   | mir-101-2-3p  | 0.55336581   | 0.011373516 | 0.060920627  | 0.798615522 |
| mir-151a-3p   | mir-20b-5p    | 0.010832084  | 0.963848718 | -0.50014655  | 0.024720617 |
| mir-25-3p     | mir-320a      | 0.968548073  | 2.55E-12    | 0.906658291  | 3.63E-08    |
| mir-27b-3p    | mir-23a-3p    | 0.666041158  | 0.001345936 | 0.877133519  | 3.85E-07    |
| mir-103a-2-3p | mir-21-5p     | 0.563286545  | 0.009704761 | 0.832761505  | 5.21E-06    |
| mir-21-5p     | mir-103a-1-3p | 0.563286545  | 0.009704761 | 0.832761505  | 5.21E-06    |
| mir-361-5p    | mir-146a-5p   | 0.816693785  | 1.12E-05    | 0.936138035  | 1.33E-09    |
| mir-361-5p    | mir-629-5p    | -0.585204937 | 0.00671643  | -0.842345687 | 3.18E-06    |
| mir-486-2-5p  | mir-484       | 0.771453863  | 6.81E-05    | 0.435159503  | 0.055161184 |
| mir-103a-2-3p | mir-125b-1-5p | -0.073980864 | 0.756580707 | 0.448481038  | 0.047331645 |
| mir-103a-2-3p | mir-125b-2-5p | -0.073980864 | 0.756580707 | 0.448481038  | 0.047331645 |
| mir-103a-1-3p | mir-125b-1-5p | -0.073980864 | 0.756580707 | 0.448481038  | 0.047331645 |
| mir-103a-1-3p | mir-125b-2-5p | -0.073980864 | 0.756580707 | 0.448481038  | 0.047331645 |
| mir-340-5p    | let-7d-3p     | 0.922939999  | 6.86E-09    | 0.782685938  | 4.52E-05    |
| mir-144-3p    | mir-185-5p    | 0.930197842  | 2.89E-09    | 0.801847508  | 2.12E-05    |
| mir-139-5p    | mir-23a-3p    | 0.582077832  | 0.007089433 | 0.840031309  | 3.59E-06    |
| mir-340-5p    | let-7d-5p     | 0.920915418  | 8.60E-09    | 0.777768687  | 5.42E-05    |
| mir-199a-2-3p | mir-30c-1-5p  | 0.899889399  | 6.64E-08    | 0.724257403  | 0.000305033 |
| mir-199a-2-3p | mir-30c-2-5p  | 0.899889399  | 6.64E-08    | 0.724257403  | 0.000305033 |
| mir-30c-1-5p  | mir-199a-1-3p | 0.899889399  | 6.64E-08    | 0.724257403  | 0.000305033 |
| mir-30c-1-5p  | mir-199b-3p   | 0.899889399  | 6.64E-08    | 0.724257403  | 0.000305033 |
| mir-199a-1-3p | mir-30c-2-5p  | 0.899889399  | 6.64E-08    | 0.724257403  | 0.000305033 |
| mir-199b-3p   | mir-30c-2-5p  | 0.899889399  | 6.64E-08    | 0.724257403  | 0.000305033 |
| let-7i-5p     | mir-24-2-3p   | 0.095448219  | 0.688944149 | 0.572136997  | 0.008389477 |
| let-7i-5p     | mir-24-1-3p   | 0.095448219  | 0.688944149 | 0.572136997  | 0.008389477 |
| mir-146b-5p   | mir-151a-3p   | 0.699864762  | 0.000592127 | 0.89001093   | 1.49E-07    |
| mir-26b-5p    | mir-30e-5p    | 0.911042637  | 2.39E-08    | 0.752529315  | 0.000129139 |
| mir-744-5p    | mir-24-2-3p   | 0.64851683   | 0.001981835 | 0.868656254  | 6.79E-07    |
| mir-744-5p    | mir-24-1-3p   | 0.64851683   | 0.001981835 | 0.868656254  | 6.79E-07    |
| mir-182-5p    | mir-484       | 0.702290907  | 0.000555923 | 0.306992518  | 0.187981816 |
| mir-27b-3p    | mir-20b-5p    | -0.239966823 | 0.308177777 | -0.663571024 | 0.001423485 |
| mir-186-5p    | norepi        | 0.214965429  | 0.362738869 | -0.323746256 | 0.163785966 |
| mir-128-1-3p  | mir-126-5p    | 0.539141337  | 0.014164444 | 0.819743184  | 9.72E-06    |
| mir-128-2-3p  | mir-126-5p    | 0.539141337  | 0.014164444 | 0.819743184  | 9.72E-06    |
| mir-30d-5p    | mir-148a-3p   | -0.234043475 | 0.320630316 | 0.304210297  | 0.192221132 |
| mir-144-3p    | mir-151a-3p   | -0.011891363 | 0.960316002 | -0.511049462 | 0.021288358 |
| mir-125b-1-5p | mir-15a-5p    | 0.34534883   | 0.135874803 | -0.189705393 | 0.423088081 |
| mir-15a-5p    | mir-125b-2-5p | 0.34534883   | 0.135874803 | -0.189705393 | 0.423088081 |
| mir-27b-3p    | mir-375       | 0.468749803  | 0.037090252 | -0.043564229 | 0.855295231 |
| mir-423-3p    | mir-106b-3p   | -0.449292385 | 0.046883975 | -0.776099877 | 5.76E-05    |
| mir-122-5p    | mir-486-2-5p  | 0.152901196  | 0.519856066 | -0.376922096 | 0.101383262 |
| mir-125b-1-5p | mir-10a-5p    | 0.421000887  | 0.064524341 | 0.761305099  | 9.66E-05    |
| mir-10a-5p    | mir-125b-2-5p | 0.421000887  | 0.064524341 | 0.761305099  | 9.66E-05    |
| mir-451a      | mir-151a-3p   | -0.011166178 | 0.962734436 | -0.50811946  | 0.022171035 |
| mir-10a-5p    | norepi        | -0.01004745  | 0.966465912 | 0.491800723  | 0.027632204 |
| mir-103a-2-3p | mir-26b-5p    | 0.323407022  | 0.164253472 | -0.209685123 | 0.374926866 |
| mir-26b-5p    | mir-103a-1-3p | 0.323407022  | 0.164253472 | -0.209685123 | 0.374926866 |
| mir-375       | mir-10a-5p    | 0.53911856   | 0.014169318 | 0.818133404  | 1.05E-05    |
| mir-126-3p    | mir-122-5p    | 0.01930739   | 0.935606874 | 0.513420325  | 0.020594768 |
| mir-26a-2-5p  | mir-125b-1-5p | -0.234341891 | 0.319995878 | 0.299495774  | 0.199550366 |
| mir-26a-2-5p  | mir-125b-2-5p | -0.234341891 | 0.319995878 | 0.299495774  | 0.199550366 |
| mir-125b-1-5p | mir-26a-1-5p  | -0.234341891 | 0.319995878 | 0.299495774  | 0.199550366 |
| mir-26a-1-5p  | mir-125b-2-5p | -0.234341891 | 0.319995878 | 0.299495774  | 0.199550366 |
| mir-126-3p    | mir-151a-5p   | 0.241492864  | 0.305017666 | 0.660371673  | 0.001529479 |
| mir-103a-2-3p | mir-744-5p    | 0.39084467   | 0.088397727 | 0.744026314  | 0.00016915  |
| mir-744-5p    | mir-103a-1-3p | 0.39084467   | 0.088397727 | 0.744026314  | 0.00016915  |
| mir-103a-2-3p | mir-451a      | 0.166089904  | 0.484030769 | -0.361636995 | 0.117179109 |
| mir-451a      | mir-103a-1-3p | 0.166089904  | 0.484030769 | -0.361636995 | 0.117179109 |
| mir-98-5p     | mir-28-3p     | 0.405383958  | 0.0761892   | 0.751503751  | 0.000133487 |

|               |               |              |             |              |             |
|---------------|---------------|--------------|-------------|--------------|-------------|
| mir-148b-3p   | mir-126-5p    | 0.644101902  | 0.002176657 | 0.864526653  | 8.84E-07    |
| let-7b-5p     | mir-106b-3p   | 0.970318379  | 1.52E-12    | 0.914155691  | 1.75E-08    |
| mir-10b-5p    | mir-423-5p    | -0.299674201 | 0.199269637 | 0.231903207  | 0.325202551 |
| mir-223-3p    | mir-629-5p    | -0.193909389 | 0.412689479 | -0.630119125 | 0.002902388 |
| mir-103a-2-3p | mir-1307-3p   | 0.051977768  | 0.827716863 | 0.534926162  | 0.015089693 |
| mir-1307-3p   | mir-103a-1-3p | 0.051977768  | 0.827716863 | 0.534926162  | 0.015089693 |
| mir-106a-5p   | mir-199a-2-3p | -0.287743973 | 0.218623727 | -0.686369073 | 0.000832139 |
| mir-106a-5p   | mir-199a-1-3p | -0.287743973 | 0.218623727 | -0.686369073 | 0.000832139 |
| mir-106a-5p   | mir-199b-3p   | -0.287743973 | 0.218623727 | -0.686369073 | 0.000832139 |
| mir-181a-2-5p | mir-21-5p     | 0.582227944  | 0.007071148 | 0.83670359   | 4.27E-06    |
| mir-21-5p     | mir-181a-1-5p | 0.582227944  | 0.007071148 | 0.83670359   | 4.27E-06    |
| let-7i-5p     | mir-20b-5p    | 0.448685045  | 0.047218774 | -0.060409306 | 0.800272938 |
| mir-223-3p    | mir-122-5p    | -0.192243399 | 0.416793646 | 0.335158356  | 0.148588807 |
| mir-15a-5p    | mir-99a-5p    | 0.164943001  | 0.487096707 | -0.359945582 | 0.119029535 |
| mir-21-5p     | mir-125b-1-5p | -0.21591077  | 0.360581045 | 0.312899599  | 0.179191235 |
| mir-21-5p     | mir-125b-2-5p | -0.21591077  | 0.360581045 | 0.312899599  | 0.179191235 |
| mir-148b-3p   | mir-23a-3p    | 0.003818486  | 0.987252592 | 0.497963     | 0.025457806 |
| mir-148b-3p   | mir-363-3p    | 0.410866024  | 0.071928507 | -0.105724128 | 0.657320629 |
| mir-148b-3p   | mir-93-5p     | 0.439437937  | 0.052546332 | -0.070685684 | 0.767129379 |
| mir-1307-3p   | mir-15b-5p    | -0.491627823 | 0.027695255 | 0.003978384  | 0.986718842 |
| mir-30c-1-5p  | mir-30a-5p    | -0.052935355 | 0.824589688 | 0.453353976  | 0.044691649 |
| mir-30a-5p    | mir-30c-2-5p  | -0.052935355 | 0.824589688 | 0.453353976  | 0.044691649 |
| mir-223-3p    | mir-139-5p    | 0.565188594  | 0.009408825 | 0.828124109  | 6.54E-06    |
| mir-451a      | mir-28-3p     | -0.312244931 | 0.180151455 | -0.69863449  | 0.000611238 |
| mir-146a-5p   | mir-28-3p     | 0.552374479  | 0.011552296 | 0.822123123  | 8.70E-06    |
| mir-92a-2-3p  | mir-374b-5p   | -0.325274428 | 0.161691309 | -0.705691342 | 0.000508352 |
| mir-374b-5p   | mir-92a-1-3p  | -0.325274428 | 0.161691309 | -0.705691342 | 0.000508352 |
| mir-181a-2-5p | mir-126-5p    | 0.630378075  | 0.002887319 | 0.857283695  | 1.37E-06    |
| mir-126-5p    | mir-181a-1-5p | 0.630378075  | 0.002887319 | 0.857283695  | 1.37E-06    |
| mir-26b-5p    | mir-320a      | 0.934419228  | 1.68E-09    | 0.818230593  | 1.04E-05    |
| mir-128-1-3p  | mir-374b-5p   | 0.666034851  | 0.001346129 | 0.872618486  | 5.23E-07    |
| mir-374b-5p   | mir-128-2-3p  | 0.666034851  | 0.001346129 | 0.872618486  | 5.23E-07    |
| mir-451a      | norepi        | -0.018032595 | 0.939850883 | -0.506664822 | 0.02261991  |
| mir-223-3p    | mir-151a-3p   | 0.482069327  | 0.031360909 | 0.78784667   | 3.72E-05    |
| mir-143-3p    | mir-151a-5p   | -0.096276334 | 0.68637634  | 0.416505841  | 0.06773382  |
| mir-320a      | mir-486-2-5p  | 0.957542231  | 3.65E-11    | 0.879926484  | 3.16E-07    |
| mir-629-5p    | mir-128-1-3p  | -0.097154548 | 0.683656797 | -0.563142027 | 0.009727552 |
| mir-629-5p    | mir-128-2-3p  | -0.097154548 | 0.683656797 | -0.563142027 | 0.009727552 |
| mir-146a-5p   | mir-24-2-3p   | 0.757351729  | 0.000110287 | 0.910409145  | 2.54E-08    |
| mir-146a-5p   | mir-24-1-3p   | 0.757351729  | 0.000110287 | 0.910409145  | 2.54E-08    |
| mir-224-5p    | norepi        | -0.318472454 | 0.171157969 | 0.206365759  | 0.382705434 |
| mir-629-5p    | mir-185-5p    | 0.868184261  | 7.00E-07    | 0.657154256  | 0.001642674 |
| mir-532-5p    | mir-194-2-5p  | 0.83363679   | 4.98E-06    | 0.580206317  | 0.007320667 |
| mir-532-5p    | mir-194-1-5p  | 0.83363679   | 4.98E-06    | 0.580206317  | 0.007320667 |
| mir-139-5p    | mir-374b-5p   | 0.505891769  | 0.022861377 | 0.798283357  | 2.46E-05    |
| mir-92a-2-3p  | mir-224-5p    | -0.259386683 | 0.26943825  | -0.664776901 | 0.001385171 |
| mir-224-5p    | mir-92a-1-3p  | -0.259386683 | 0.26943825  | -0.664776901 | 0.001385171 |
| mir-1307-3p   | mir-148b-3p   | -0.27553158  | 0.239672571 | 0.247292168  | 0.293188576 |
| mir-98-5p     | mir-224-5p    | 0.297329543  | 0.202979693 | 0.686762346  | 0.000824133 |
| mir-20b-5p    | norepi        | 0.119402618  | 0.616088328 | -0.391774798 | 0.087576143 |
| mir-28-5p     | mir-99a-5p    | 0.051621954  | 0.828879476 | 0.526116087  | 0.017180483 |
| mir-92a-2-3p  | mir-221-3p    | -0.791376298 | 3.24E-05    | -0.922863946 | 6.92E-09    |
| mir-221-3p    | mir-92a-1-3p  | -0.791376298 | 3.24E-05    | -0.922863946 | 6.92E-09    |
| mir-26b-5p    | mir-28-3p     | -0.189518218 | 0.423554291 | -0.619756143 | 0.003561501 |
| mir-192-5p    | mir-185-5p    | 0.881413485  | 2.84E-07    | 0.690792273  | 0.000745772 |
| mir-181a-2-5p | mir-122-5p    | -0.256652233 | 0.274699108 | 0.263659322  | 0.261345409 |
| mir-122-5p    | mir-181a-1-5p | -0.256652233 | 0.274699108 | 0.263659322  | 0.261345409 |
| let-7f-2-5p   | mir-629-5p    | -0.446477832 | 0.048450989 | -0.766856041 | 8.00E-05    |
| mir-629-5p    | let-7f-1-5p   | -0.446477832 | 0.048450989 | -0.766856041 | 8.00E-05    |
| mir-30c-1-5p  | mir-30e-5p    | -0.097702672 | 0.681961333 | 0.408887731  | 0.073444968 |
| mir-30e-5p    | mir-30c-2-5p  | -0.097702672 | 0.681961333 | 0.408887731  | 0.073444968 |
| mir-222-3p    | mir-28-3p     | -0.00529728  | 0.982316512 | -0.490626393 | 0.028062674 |
| mir-361-5p    | mir-125b-1-5p | -0.202878347 | 0.390974269 | 0.31475927   | 0.176482585 |
| mir-361-5p    | mir-125b-2-5p | -0.202878347 | 0.390974269 | 0.31475927   | 0.176482585 |

|               |               |              |             |              |             |
|---------------|---------------|--------------|-------------|--------------|-------------|
| mir-92a-2-3p  | mir-24-2-3p   | -0.754593396 | 0.000120757 | -0.907734862 | 3.28E-08    |
| mir-92a-2-3p  | mir-24-1-3p   | -0.754593396 | 0.000120757 | -0.907734862 | 3.28E-08    |
| mir-24-2-3p   | mir-92a-1-3p  | -0.754593396 | 0.000120757 | -0.907734862 | 3.28E-08    |
| mir-24-1-3p   | mir-92a-1-3p  | -0.754593396 | 0.000120757 | -0.907734862 | 3.28E-08    |
| mir-122-5p    | mir-375       | 0.553832919  | 0.011290056 | 0.092675343  | 0.69756598  |
| let-7i-5p     | let-7b-5p     | 0.45681349   | 0.042887318 | -0.03756078  | 0.87507481  |
| mir-98-5p     | mir-151a-3p   | 0.612627741  | 0.004083387 | 0.846573154  | 2.53E-06    |
| mir-25-3p     | mir-126-5p    | 0.325911197  | 0.160823972 | -0.190210777 | 0.421830656 |
| mir-27b-3p    | mir-25-3p     | -0.23548841  | 0.317565339 | -0.647381041 | 0.002030503 |
| mir-151a-3p   | mir-363-3p    | -0.040810046 | 0.864359844 | -0.516350981 | 0.019762395 |
| mir-222-3p    | mir-185-5p    | 0.781948789  | 4.65E-05    | 0.918731697  | 1.09E-08    |
| mir-423-3p    | mir-128-1-3p  | 0.434135172  | 0.055801664 | 0.759579434  | 0.00010241  |
| mir-423-3p    | mir-128-2-3p  | 0.434135172  | 0.055801664 | 0.759579434  | 0.00010241  |
| mir-24-2-3p   | norepi        | 0.049395502  | 0.836162043 | 0.522311283  | 0.018152262 |
| mir-24-1-3p   | norepi        | 0.049395502  | 0.836162043 | 0.522311283  | 0.018152262 |
| let-7g-5p     | norepi        | 0.575786389  | 0.007891345 | 0.12556257   | 0.597866207 |
| mir-224-5p    | mir-125b-1-5p | 0.126002698  | 0.596572852 | 0.57599067   | 0.007864192 |
| mir-224-5p    | mir-125b-2-5p | 0.126002698  | 0.596572852 | 0.57599067   | 0.007864192 |
| mir-146a-5p   | mir-148a-3p   | -0.373341398 | 0.104936162 | 0.136324005  | 0.56658356  |
| mir-532-5p    | norepi        | -0.053706001 | 0.822074849 | -0.524828814 | 0.017504485 |
| mir-182-5p    | mir-192-5p    | 0.759799933  | 0.000101658 | 0.435447073  | 0.054982386 |
| mir-423-5p    | mir-30e-5p    | 0.899614262  | 6.80E-08    | 0.73596637   | 0.000216439 |
| mir-375       | cpeptide      | 0.354101453  | 0.125584025 | -0.156854697 | 0.508987543 |
| mir-125a-5p   | mir-375       | 0.038232959  | 0.872856414 | 0.512601018  | 0.02083239  |
| mir-23a-3p    | norepi        | -0.050206076 | 0.833509196 | 0.444155301  | 0.049774048 |
| mir-423-3p    | mir-139-5p    | 0.441522965  | 0.051306839 | 0.762323749  | 9.34E-05    |
| mir-148b-3p   | mir-107       | 0.481357306  | 0.03164846  | -0.002809648 | 0.990620269 |
| mir-16-2-5p   | norepi        | 0.084250127  | 0.723978758 | -0.41617231  | 0.067976653 |
| mir-16-1-5p   | norepi        | 0.084250127  | 0.723978758 | -0.41617231  | 0.067976653 |
| mir-423-3p    | mir-143-3p    | -0.232685218 | 0.323527476 | 0.28170005   | 0.228883586 |
| mir-25-3p     | mir-122-5p    | 0.126242958  | 0.595867318 | -0.379591271 | 0.09879232  |
| mir-122-5p    | mir-148a-3p   | 0.7702331    | 7.11E-05    | 0.457871423  | 0.042346929 |
| mir-21-5p     | mir-148b-3p   | 0.298409135  | 0.201265741 | 0.682625034  | 0.000911712 |
| let-7i-5p     | mir-15a-5p    | 0.192152799  | 0.417017466 | -0.319306305 | 0.169977528 |
| let-7i-5p     | mir-181a-2-5p | 0.537643417  | 0.01448786  | 0.809666034  | 1.52E-05    |
| let-7i-5p     | mir-181a-1-5p | 0.537643417  | 0.01448786  | 0.809666034  | 1.52E-05    |
| mir-374b-5p   | mir-126-5p    | 0.754551949  | 0.000120921 | 0.906621813  | 3.64E-08    |
| mir-320a      | cpeptide      | -0.32456652  | 0.162659325 | 0.18542786   | 0.43381078  |
| mir-30d-5p    | mir-128-1-3p  | 0.7861335    | 3.97E-05    | 0.919443617  | 1.01E-08    |
| mir-30d-5p    | mir-128-2-3p  | 0.7861335    | 3.97E-05    | 0.919443617  | 1.01E-08    |
| mir-199a-2-3p | mir-363-3p    | -0.271594711 | 0.246726743 | -0.665519171 | 0.001362021 |
| mir-199a-1-3p | mir-363-3p    | -0.271594711 | 0.246726743 | -0.665519171 | 0.001362021 |
| mir-199b-3p   | mir-363-3p    | -0.271594711 | 0.246726743 | -0.665519171 | 0.001362021 |
| mir-744-5p    | norepi        | 0.184204283  | 0.436904144 | 0.610926272  | 0.004216884 |
| mir-103a-2-3p | mir-363-3p    | 0.166849402  | 0.482005729 | -0.341030672 | 0.141164974 |
| mir-103a-1-3p | mir-363-3p    | 0.166849402  | 0.482005729 | -0.341030672 | 0.141164974 |
| mir-629-5p    | mir-374b-5p   | -0.101130048 | 0.671393245 | -0.554694423 | 0.01113743  |
| mir-3615      | mir-148b-3p   | 0.13527446   | 0.569602665 | -0.368961803 | 0.109403418 |
| mir-744-5p    | mir-28-3p     | 0.505165848  | 0.023089978 | 0.793001709  | 3.04E-05    |
| mir-144-3p    | mir-320a      | 0.893859466  | 1.10E-07    | 0.724793868  | 0.000300387 |
| mir-199a-2-3p | mir-28-3p     | 0.555697467  | 0.01096184  | 0.817645374  | 1.07E-05    |
| mir-199a-1-3p | mir-28-3p     | 0.555697467  | 0.01096184  | 0.817645374  | 1.07E-05    |
| mir-199b-3p   | mir-28-3p     | 0.555697467  | 0.01096184  | 0.817645374  | 1.07E-05    |
| mir-143-3p    | mir-320a      | -0.279763984 | 0.232235244 | -0.669800311 | 0.00123475  |
| mir-25-3p     | norepi        | 0.098623753  | 0.679115534 | -0.400302307 | 0.080303993 |
| mir-361-5p    | mir-23a-3p    | 0.727842321  | 0.000275114 | 0.895072373  | 9.95E-08    |
| mir-19b-2-3p  | norepi        | 0.104557093  | 0.660885221 | -0.394785915 | 0.084954988 |
| mir-19b-1-3p  | norepi        | 0.104557093  | 0.660885221 | -0.394785915 | 0.084954988 |
| mir-181a-2-5p | mir-128-1-3p  | 0.614338683  | 0.003952693 | 0.844871409  | 2.77E-06    |
| mir-181a-2-5p | mir-128-2-3p  | 0.614338683  | 0.003952693 | 0.844871409  | 2.77E-06    |
| mir-128-1-3p  | mir-181a-1-5p | 0.614338683  | 0.003952693 | 0.844871409  | 2.77E-06    |
| mir-128-2-3p  | mir-181a-1-5p | 0.614338683  | 0.003952693 | 0.844871409  | 2.77E-06    |
| mir-148a-3p   | mir-150-5p    | 0.354864427  | 0.124714048 | -0.14980912  | 0.528431935 |
| mir-26b-5p    | mir-122-5p    | 0.003570923  | 0.988078983 | -0.476391762 | 0.033711619 |

|               |               |              |             |              |             |
|---------------|---------------|--------------|-------------|--------------|-------------|
| mir-103a-2-3p | mir-3615      | 0.108573274  | 0.648648195 | -0.390886912 | 0.088360292 |
| mir-3615      | mir-103a-1-3p | 0.108573274  | 0.648648195 | -0.390886912 | 0.088360292 |
| mir-199a-2-3p | mir-221-3p    | 0.894770282  | 1.02E-07    | 0.961623315  | 1.49E-11    |
| mir-199a-1-3p | mir-221-3p    | 0.894770282  | 1.02E-07    | 0.961623315  | 1.49E-11    |
| mir-199b-3p   | mir-221-3p    | 0.894770282  | 1.02E-07    | 0.961623315  | 1.49E-11    |
| mir-122-5p    | let-7b-5p     | 0.076340162  | 0.749053286 | -0.417696341 | 0.06687237  |
| mir-24-2-3p   | mir-139-5p    | 0.688251672  | 0.0007944   | 0.87768537   | 3.70E-07    |
| mir-139-5p    | mir-24-1-3p   | 0.688251672  | 0.0007944   | 0.87768537   | 3.70E-07    |
| mir-361-5p    | mir-148a-3p   | -0.239444739 | 0.309263428 | 0.269318333  | 0.250865595 |
| mir-103a-2-3p | mir-423-5p    | 0.673656068  | 0.001128841 | 0.289099333  | 0.21636508  |
| mir-423-5p    | mir-103a-1-3p | 0.673656068  | 0.001128841 | 0.289099333  | 0.21636508  |
| mir-144-3p    | mir-192-5p    | 0.888728405  | 1.65E-07    | 0.71445479   | 0.000401387 |
| mir-146b-5p   | mir-28-5p     | 0.588717164  | 0.006316833 | 0.832188634  | 5.36E-06    |
| let-7i-5p     | mir-23a-3p    | 0.129433856  | 0.586530284 | 0.57139141   | 0.008494337 |
| mir-181a-2-5p | mir-224-5p    | 0.438711253  | 0.052983654 | 0.757373556  | 0.000110208 |
| mir-224-5p    | mir-181a-1-5p | 0.438711253  | 0.052983654 | 0.757373556  | 0.000110208 |
| mir-126-3p    | let-7a-3-5p   | 0.750440166  | 0.000138127 | 0.90393355   | 4.65E-08    |
| mir-126-3p    | let-7a-2-5p   | 0.750440166  | 0.000138127 | 0.90393355   | 4.65E-08    |
| mir-126-3p    | let-7a-1-5p   | 0.750440166  | 0.000138127 | 0.90393355   | 4.65E-08    |
| mir-27b-3p    | mir-221-3p    | 0.612646789  | 0.004081912 | 0.843261848  | 3.02E-06    |
| mir-186-5p    | mir-20b-5p    | 0.899912583  | 6.62E-08    | 0.740971783  | 0.000185907 |
| mir-361-5p    | norepi        | 0.063380121  | 0.790654929 | 0.524545847  | 0.017576358 |
| mir-181b-2-5p | copeptin      | 0.151929947  | 0.52254274  | -0.350387295 | 0.129880808 |
| mir-181b-1-5p | copeptin      | 0.151929947  | 0.52254274  | -0.350387295 | 0.129880808 |
| mir-182-5p    | mir-1307-3p   | -0.534062258 | 0.015285189 | -0.805752342 | 1.80E-05    |
| mir-1307-3p   | mir-150-5p    | 0.18307959   | 0.439757722 | -0.321860257 | 0.166396748 |
| mir-126-3p    | mir-28-3p     | 0.421646965  | 0.064072629 | 0.748065024  | 0.000148992 |
| mir-22-3p     | mir-30c-1-5p  | -0.111455293 | 0.639919783 | 0.385775834  | 0.09297504  |
| mir-22-3p     | mir-30c-2-5p  | -0.111455293 | 0.639919783 | 0.385775834  | 0.09297504  |
| mir-146a-5p   | mir-106a-5p   | -0.380462438 | 0.097957231 | -0.72557396  | 0.000293738 |
| mir-629-5p    | mir-320a      | 0.860534679  | 1.13E-06    | 0.650821419  | 0.001886078 |
| mir-148b-3p   | cpeptide      | -0.551625817 | 0.011688814 | -0.101916407 | 0.668976825 |
| mir-182-5p    | mir-106a-5p   | 0.737112085  | 0.000209097 | 0.898095382  | 7.74E-08    |
| mir-17-5p     | mir-25-3p     | 0.87708876   | 3.86E-07    | 0.688444105  | 0.000790625 |
| mir-126-3p    | let-7d-5p     | 0.64288657   | 0.002233011 | 0.856717724  | 1.42E-06    |
| mir-103a-2-3p | mir-223-3p    | 0.582736496  | 0.00700949  | 0.828614046  | 6.39E-06    |
| mir-223-3p    | mir-103a-1-3p | 0.582736496  | 0.00700949  | 0.828614046  | 6.39E-06    |
| mir-151a-3p   | mir-151a-5p   | 0.157881952  | 0.506181461 | 0.589099087  | 0.006274583 |
| let-7d-5p     | mir-28-3p     | 0.430778446  | 0.057940197 | 0.752119841  | 0.00013086  |
| let-7d-5p     | mir-139-5p    | 0.55597439   | 0.01091376  | 0.815695806  | 1.17E-05    |
| mir-320a      | mir-28-3p     | -0.099270854 | 0.677118727 | -0.548611888 | 0.012251676 |
| mir-126-3p    | mir-98-5p     | 0.685429253  | 0.000851539 | 0.875434412  | 4.33E-07    |
| mir-22-3p     | mir-26b-5p    | 0.881261563  | 2.87E-07    | 0.698743556  | 0.000609523 |
| mir-126-3p    | mir-125b-1-5p | -0.010728672 | 0.964193636 | 0.466489834  | 0.038138198 |
| mir-126-3p    | mir-125b-2-5p | -0.010728672 | 0.964193636 | 0.466489834  | 0.038138198 |
| mir-146b-5p   | mir-224-5p    | 0.237132473  | 0.314099398 | 0.639765379  | 0.002383349 |
| mir-146b-5p   | let-7a-3-5p   | 0.802859249  | 2.04E-05    | 0.924997703  | 5.42E-09    |
| mir-146b-5p   | let-7a-2-5p   | 0.802859249  | 2.04E-05    | 0.924997703  | 5.42E-09    |
| mir-146b-5p   | let-7a-1-5p   | 0.802859249  | 2.04E-05    | 0.924997703  | 5.42E-09    |
| mir-584-5p    | mir-151a-3p   | 0.340139735  | 0.142274199 | 0.701234245  | 0.000571453 |
| mir-122-5p    | mir-363-3p    | 0.100570933  | 0.673113255 | -0.391936938 | 0.087433502 |
| mir-148b-3p   | mir-185-5p    | 0.567769562  | 0.009019041 | 0.128750284  | 0.588525292 |
| mir-103a-2-3p | mir-374b-5p   | 0.698066633  | 0.000620233 | 0.880529352  | 3.03E-07    |
| mir-103a-1-3p | mir-374b-5p   | 0.698066633  | 0.000620233 | 0.880529352  | 3.03E-07    |
| let-7f-2-5p   | mir-1307-3p   | 0.318068947  | 0.171731203 | 0.687507148  | 0.000809148 |
| mir-1307-3p   | let-7f-1-5p   | 0.318068947  | 0.171731203 | 0.687507148  | 0.000809148 |
| mir-144-3p    | mir-584-5p    | -0.221344121 | 0.348322314 | -0.627559638 | 0.00305488  |
| mir-151a-3p   | let-7b-5p     | -0.125976834 | 0.596648822 | -0.564030706 | 0.00958809  |
| mir-182-5p    | mir-30e-5p    | 0.701652846  | 0.000565257 | 0.344073366  | 0.137422588 |
| mir-1307-3p   | let-7d-5p     | 0.31231246   | 0.180052248 | 0.683067174  | 0.000901993 |
| mir-27b-3p    | mir-629-5p    | -0.488378103 | 0.028901528 | -0.780099669 | 4.98E-05    |
| mir-584-5p    | mir-629-5p    | -0.225829777 | 0.338386735 | -0.629205266 | 0.00295609  |
| mir-486-2-5p  | mir-126-5p    | 0.200972498  | 0.395534674 | -0.297089108 | 0.203362723 |
| mir-103a-2-3p | mir-99a-5p    | 0.017698581  | 0.940963131 | 0.483307376  | 0.030865796 |



|               |               |              |             |              |             |
|---------------|---------------|--------------|-------------|--------------|-------------|
| mir-103a-1-3p | mir-99a-5p    | 0.017698581  | 0.940963131 | 0.483307376  | 0.030865796 |
| mir-486-2-5p  | mir-15b-5p    | 0.602473225  | 0.004934788 | 0.185556695  | 0.433485744 |
| mir-26a-2-5p  | mir-629-5p    | -0.422023054 | 0.063810783 | -0.743940212 | 0.000169604 |
| mir-629-5p    | mir-26a-1-5p  | -0.422023054 | 0.063810783 | -0.743940212 | 0.000169604 |
| let-7a-3-5p   | mir-340-5p    | 0.923616252  | 6.36E-09    | 0.801965248  | 2.11E-05    |
| mir-340-5p    | let-7a-2-5p   | 0.923616252  | 6.36E-09    | 0.801965248  | 2.11E-05    |
| mir-340-5p    | let-7a-1-5p   | 0.923616252  | 6.36E-09    | 0.801965248  | 2.11E-05    |
| mir-423-3p    | mir-125b-1-5p | -0.512058199 | 0.02099102  | -0.05659014  | 0.812678074 |
| mir-423-3p    | mir-125b-2-5p | -0.512058199 | 0.02099102  | -0.05659014  | 0.812678074 |
| let-7d-3p     | norepi        | 0.252910612  | 0.282000762 | 0.64535103   | 0.002119979 |
| mir-30e-5p    | mir-93-5p     | 0.898273513  | 7.62E-08    | 0.74210367   | 0.000179539 |
| mir-451a      | mir-99a-5p    | 0.398126581  | 0.082115269 | -0.086270885 | 0.717615022 |
| mir-361-5p    | mir-1307-3p   | 0.513494408  | 0.020573389 | 0.79141735   | 3.24E-05    |
| mir-146b-5p   | let-7d-5p     | 0.78038803   | 4.93E-05    | 0.914438848  | 1.71E-08    |
| mir-29a-3p    | mir-423-3p    | -0.421830141 | 0.063944995 | 0.057137397  | 0.810897804 |
| mir-27b-3p    | mir-451a      | -0.209583322 | 0.375164089 | -0.616813214 | 0.003769813 |
| mir-375       | let-7d-3p     | -0.050892793 | 0.83126306  | 0.426880005  | 0.060501261 |
| mir-103a-2-3p | mir-224-5p    | 0.30316076   | 0.193836872 | 0.674990174  | 0.001094026 |
| mir-224-5p    | mir-103a-1-3p | 0.30316076   | 0.193836872 | 0.674990174  | 0.001094026 |
| mir-148a-3p   | let-7d-3p     | -0.355571401 | 0.123911765 | 0.134017459  | 0.573227734 |
| mir-1307-3p   | mir-28-5p     | 0.314928815  | 0.176237035 | 0.681517852  | 0.000936439 |
| mir-199a-2-3p | mir-106b-3p   | -0.362689271 | 0.116038367 | -0.709212029 | 0.000462786 |
| mir-106b-3p   | mir-199a-1-3p | -0.362689271 | 0.116038367 | -0.709212029 | 0.000462786 |
| mir-106b-3p   | mir-199b-3p   | -0.362689271 | 0.116038367 | -0.709212029 | 0.000462786 |
| mir-182-5p    | mir-27a-3p    | 0.511718372  | 0.021090817 | 0.059403005  | 0.803537191 |
| mir-143-3p    | copeptin      | -0.09232199  | 0.698667269 | 0.390981338  | 0.088276653 |
| mir-98-5p     | mir-93-5p     | -0.000150266 | 0.999498341 | -0.466442052 | 0.0381606   |
| mir-182-5p    | mir-20a-5p    | 0.833185461  | 5.10E-06    | 0.600118326  | 0.005151816 |
| mir-98-5p     | mir-106a-5p   | -0.19639745  | 0.406601098 | -0.606754872 | 0.004559511 |
| let-7d-5p     | mir-10a-5p    | 0.166520027  | 0.482883419 | 0.586791309  | 0.006533452 |
| let-7b-5p     | mir-150-5p    | -0.018462996 | 0.938417822 | 0.451162479  | 0.045864521 |
| let-7a-3-5p   | mir-375       | -0.041050699 | 0.863567136 | 0.432837515  | 0.056621148 |
| let-7a-2-5p   | mir-375       | -0.041050699 | 0.863567136 | 0.432837515  | 0.056621148 |
| let-7a-1-5p   | mir-375       | -0.041050699 | 0.863567136 | 0.432837515  | 0.056621148 |
| mir-151a-3p   | let-7d-5p     | 0.613039905  | 0.004051581 | 0.839097702  | 3.77E-06    |
| mir-25-3p     | mir-151a-3p   | 0.074345775  | 0.755415045 | -0.405173615 | 0.076356341 |
| mir-122-5p    | mir-139-5p    | -0.144046068 | 0.544589223 | 0.344244925  | 0.13721368  |
| mir-144-3p    | mir-28-3p     | -0.254663684 | 0.278564869 | -0.643139556 | 0.002221181 |
| mir-191-5p    | mir-148a-3p   | -0.248126123 | 0.291510996 | 0.244367798  | 0.299117882 |
| mir-144-3p    | mir-99a-5p    | 0.247015316  | 0.293746796 | -0.244896118 | 0.298041316 |
| mir-101-1-3p  | mir-320a      | 0.945715314  | 3.19E-10    | 0.85851796   | 1.28E-06    |
| mir-320a      | mir-101-2-3p  | 0.945715314  | 3.19E-10    | 0.85851796   | 1.28E-06    |
| mir-199a-1-5p | mir-143-3p    | 0.096941645  | 0.684315746 | 0.53635062   | 0.01477174  |
| mir-143-3p    | mir-199a-2-5p | 0.096941645  | 0.684315746 | 0.53635062   | 0.01477174  |
| mir-27b-3p    | mir-191-5p    | 0.49089243   | 0.027964695 | 0.777306158  | 5.52E-05    |
| let-7f-2-5p   | mir-27a-3p    | -0.167208759 | 0.481049051 | 0.320740283  | 0.167960576 |
| mir-27a-3p    | let-7f-1-5p   | -0.167208759 | 0.481049051 | 0.320740283  | 0.167960576 |
| let-7d-5p     | mir-30a-5p    | -0.104556977 | 0.660885573 | 0.376477904  | 0.101819185 |
| mir-126-3p    | mir-1307-3p   | 0.318186331  | 0.171564308 | 0.680596858  | 0.000957436 |
| mir-126-3p    | mir-30d-5p    | 0.548570235  | 0.012259606 | 0.806468003  | 1.75E-05    |
| mir-181b-2-5p | mir-15a-5p    | 0.473213649  | 0.03508623  | 0.01372032   | 0.954218101 |
| mir-181b-1-5p | mir-15a-5p    | 0.473213649  | 0.03508623  | 0.01372032   | 0.954218101 |
| mir-194-2-5p  | mir-378a-3p   | 0.757809154  | 0.000108629 | 0.903510099  | 4.83E-08    |
| mir-194-1-5p  | mir-378a-3p   | 0.757809154  | 0.000108629 | 0.903510099  | 4.83E-08    |
| mir-744-5p    | mir-15a-5p    | -0.76149491  | 9.60E-05    | -0.905053373 | 4.20E-08    |
| mir-182-5p    | mir-139-5p    | -0.249261046 | 0.289237482 | -0.637678516 | 0.002488505 |
| let-7f-2-5p   | mir-146a-5p   | 0.814798717  | 1.22E-05    | 0.927558557  | 4.00E-09    |
| mir-146a-5p   | let-7f-1-5p   | 0.814798717  | 1.22E-05    | 0.927558557  | 4.00E-09    |
| mir-24-2-3p   | mir-30d-5p    | 0.482694947  | 0.031109943 | 0.772184442  | 6.63E-05    |
| mir-30d-5p    | mir-24-1-3p   | 0.482694947  | 0.031109943 | 0.772184442  | 6.63E-05    |
| mir-425-5p    | mir-15a-5p    | 0.606310171  | 0.004597356 | 0.201232375  | 0.394911105 |
| mir-148a-3p   | mir-221-3p    | -0.293148457 | 0.209709036 | 0.194509497  | 0.411216494 |
| mir-1307-3p   | mir-23a-3p    | 0.425636474  | 0.061335946 | 0.741327134  | 0.000183887 |
| mir-144-3p    | mir-106b-3p   | 0.914939983  | 1.62E-08    | 0.784984817  | 4.15E-05    |

|               |               |              |             |              |             |
|---------------|---------------|--------------|-------------|--------------|-------------|
| mir-340-5p    | mir-23a-3p    | 0.488365749  | 0.028906191 | 0.774796498  | 6.04E-05    |
| mir-15a-5p    | mir-126-5p    | 0.012434106  | 0.958506215 | -0.45084704  | 0.046035272 |
| mir-486-2-5p  | mir-150-5p    | 0.048678729  | 0.838509321 | 0.497885462  | 0.025484299 |
| mir-27b-3p    | mir-15b-5p    | -0.17425354  | 0.462486971 | 0.311031478  | 0.181940484 |
| mir-532-5p    | mir-99a-5p    | 0.276036088  | 0.238778075 | -0.21090278  | 0.372095976 |
| mir-126-3p    | mir-99a-5p    | 0.147453969  | 0.535007779 | 0.56898418   | 0.008840215 |
| let-7d-5p     | mir-20b-5p    | -0.227257606 | 0.335259402 | -0.621788919 | 0.003423263 |
| mir-3615      | mir-99a-5p    | 0.460287621  | 0.041132464 | 0.001344819  | 0.995510382 |
| mir-98-5p     | mir-486-2-5p  | -0.112098958 | 0.63797655  | -0.543324758 | 0.01329188  |
| mir-92a-2-3p  | let-7d-5p     | -0.589800527 | 0.006197591 | -0.825328949 | 7.48E-06    |
| let-7d-5p     | mir-92a-1-3p  | -0.589800527 | 0.006197591 | -0.825328949 | 7.48E-06    |
| mir-101-1-3p  | mir-99a-5p    | 0.371419263  | 0.106880183 | -0.104914854 | 0.659791721 |
| mir-101-2-3p  | mir-99a-5p    | 0.371419263  | 0.106880183 | -0.104914854 | 0.659791721 |
| mir-101-1-3p  | mir-192-5p    | 0.904851239  | 4.28E-08    | 0.762940764  | 9.14E-05    |
| mir-192-5p    | mir-101-2-3p  | 0.904851239  | 4.28E-08    | 0.762940764  | 9.14E-05    |
| mir-222-3p    | mir-532-5p    | 0.615401037  | 0.0038733   | 0.837359274  | 4.12E-06    |
| let-7a-3-5p   | mir-151a-3p   | 0.689853201  | 0.000763444 | 0.872194009  | 5.38E-07    |
| let-7a-2-5p   | mir-151a-3p   | 0.689853201  | 0.000763444 | 0.872194009  | 5.38E-07    |
| let-7a-1-5p   | mir-151a-3p   | 0.689853201  | 0.000763444 | 0.872194009  | 5.38E-07    |
| mir-92a-2-3p  | mir-128-1-3p  | -0.515575136 | 0.019980097 | -0.787395911 | 3.78E-05    |
| mir-92a-2-3p  | mir-128-2-3p  | -0.515575136 | 0.019980097 | -0.787395911 | 3.78E-05    |
| mir-128-1-3p  | mir-92a-1-3p  | -0.515575136 | 0.019980097 | -0.787395911 | 3.78E-05    |
| mir-128-2-3p  | mir-92a-1-3p  | -0.515575136 | 0.019980097 | -0.787395911 | 3.78E-05    |
| mir-26b-5p    | mir-425-5p    | 0.803684491  | 1.97E-05    | 0.547474977  | 0.012469606 |
| mir-29a-3p    | mir-340-5p    | -0.096459151 | 0.68580991  | 0.377699464  | 0.100623634 |
| mir-222-3p    | let-7b-5p     | 0.68829011   | 0.000793645 | 0.871381221  | 5.68E-07    |
| let-7a-3-5p   | mir-1307-3p   | 0.331509531  | 0.153336495 | 0.684976041  | 0.00086103  |
| mir-1307-3p   | let-7a-2-5p   | 0.331509531  | 0.153336495 | 0.684976041  | 0.00086103  |
| mir-1307-3p   | let-7a-1-5p   | 0.331509531  | 0.153336495 | 0.684976041  | 0.00086103  |
| mir-182-5p    | mir-194-2-5p  | 0.721562867  | 0.000329308 | 0.394398699  | 0.08528877  |
| mir-182-5p    | mir-194-1-5p  | 0.721562867  | 0.000329308 | 0.394398699  | 0.08528877  |
| mir-30d-5p    | mir-27a-3p    | -0.032983367 | 0.890204724 | 0.430370308  | 0.058204398 |
| mir-10a-5p    | let-7d-3p     | 0.397400374  | 0.082726513 | 0.722919123  | 0.000316891 |
| let-7i-5p     | mir-30c-1-5p  | 0.229927837  | 0.329456713 | 0.620579898  | 0.003504935 |
| let-7i-5p     | mir-30c-2-5p  | 0.229927837  | 0.329456713 | 0.620579898  | 0.003504935 |
| mir-146b-5p   | mir-125b-1-5p | -0.111355665 | 0.640220764 | 0.362705666  | 0.116020657 |
| mir-146b-5p   | mir-125b-2-5p | -0.111355665 | 0.640220764 | 0.362705666  | 0.116020657 |
| mir-143-3p    | mir-194-2-5p  | -0.067876297 | 0.776154237 | -0.507551765 | 0.022345366 |
| mir-143-3p    | mir-194-1-5p  | -0.067876297 | 0.776154237 | -0.507551765 | 0.022345366 |
| mir-103a-2-3p | let-7g-5p     | 0.83524847   | 4.59E-06    | 0.6131313    | 0.004044555 |
| mir-103a-1-3p | let-7g-5p     | 0.83524847   | 4.59E-06    | 0.6131313    | 0.004044555 |
| mir-92a-2-3p  | mir-148b-3p   | 0.088619658  | 0.710240772 | -0.381791272 | 0.096693366 |
| mir-148b-3p   | mir-92a-1-3p  | 0.088619658  | 0.710240772 | -0.381791272 | 0.096693366 |
| let-7i-5p     | mir-144-3p    | 0.515194299  | 0.020087655 | 0.078900547  | 0.740908961 |
| mir-98-5p     | mir-25-3p     | -0.082931392 | 0.728141148 | -0.518150711 | 0.019264668 |
| mir-19b-2-3p  | mir-25-3p     | 0.941046002  | 6.59E-10    | 0.850096029  | 2.08E-06    |
| mir-25-3p     | mir-19b-1-3p  | 0.941046002  | 6.59E-10    | 0.850096029  | 2.08E-06    |
| mir-126-5p    | let-7g-5p     | 0.413012286  | 0.070309908 | 0.730362705  | 0.000255612 |
| mir-21-5p     | mir-126-5p    | 0.463138167  | 0.039734511 | 0.757978395  | 0.000108021 |
| mir-122-5p    | mir-185-5p    | 0.049616574  | 0.83543835  | -0.41380991  | 0.069715391 |
| mir-98-5p     | let-7a-3-5p   | 0.879433339  | 3.27E-07    | 0.952923725  | 9.09E-11    |
| mir-98-5p     | let-7a-2-5p   | 0.879433339  | 3.27E-07    | 0.952923725  | 9.09E-11    |
| mir-98-5p     | let-7a-1-5p   | 0.879433339  | 3.27E-07    | 0.952923725  | 9.09E-11    |
| mir-340-5p    | mir-151a-5p   | 0.475510956  | 0.034088303 | 0.764151118  | 8.77E-05    |
| mir-224-5p    | mir-151a-5p   | -0.123011531 | 0.605385466 | 0.349839135  | 0.130523671 |
| mir-1307-3p   | mir-191-5p    | 0.309032488  | 0.184913831 | 0.668681278  | 0.001267008 |
| mir-148a-3p   | mir-28-5p     | -0.197959727 | 0.40280333  | 0.280520357  | 0.230922069 |
| mir-146a-5p   | norepi        | 0.203001162  | 0.390681395 | 0.600949006  | 0.00507438  |
| mir-10b-5p    | mir-15a-5p    | -0.208335571 | 0.378078558 | 0.26994888   | 0.249714745 |
| mir-26a-2-5p  | mir-181a-2-5p | 0.679418728  | 0.000984874 | 0.865833059  | 8.14E-07    |
| mir-26a-2-5p  | mir-181a-1-5p | 0.679418728  | 0.000984874 | 0.865833059  | 8.14E-07    |
| mir-181a-2-5p | mir-26a-1-5p  | 0.679418728  | 0.000984874 | 0.865833059  | 8.14E-07    |
| mir-26a-1-5p  | mir-181a-1-5p | 0.679418728  | 0.000984874 | 0.865833059  | 8.14E-07    |
| mir-423-3p    | mir-23a-3p    | 0.336900051  | 0.146359141 | 0.685120794  | 0.000857989 |

|               |               |              |             |              |             |
|---------------|---------------|--------------|-------------|--------------|-------------|
| mir-223-3p    | mir-151a-5p   | 0.602847688  | 0.004900983 | 0.829058262  | 6.25E-06    |
| mir-199a-1-5p | mir-486-2-5p  | -0.52598898  | 0.01721226  | -0.790045327 | 3.41E-05    |
| mir-486-2-5p  | mir-199a-2-5p | -0.52598898  | 0.01721226  | -0.790045327 | 3.41E-05    |
| mir-532-5p    | mir-148a-3p   | 0.368406627  | 0.109979359 | -0.100042134 | 0.674741441 |
| mir-3615      | mir-584-5p    | -0.442762906 | 0.050580399 | -0.745334451 | 0.00016238  |
| mir-148a-3p   | mir-93-5p     | 0.243350552  | 0.30119741  | -0.233962114 | 0.32080342  |
| mir-126-3p    | let-7i-5p     | 0.287625251  | 0.218822306 | 0.65412624   | 0.001755544 |
| mir-30c-1-5p  | mir-99b-5p    | 0.748571519  | 0.000146615 | 0.44882436   | 0.047141814 |
| mir-99b-5p    | mir-30c-2-5p  | 0.748571519  | 0.000146615 | 0.44882436   | 0.047141814 |
| mir-181b-2-5p | mir-363-3p    | 0.552146162  | 0.011593792 | 0.134317186  | 0.572362443 |
| mir-181b-1-5p | mir-363-3p    | 0.552146162  | 0.011593792 | 0.134317186  | 0.572362443 |
| mir-182-5p    | mir-629-5p    | 0.777527601  | 5.47E-05    | 0.909532203  | 2.77E-08    |
| mir-139-5p    | let-7g-5p     | 0.150837862  | 0.525571431 | 0.563142496  | 0.009727478 |
| mir-27b-3p    | let-7d-3p     | 0.575148117  | 0.007976679 | 0.814514403  | 1.23E-05    |
| let-7f-2-5p   | mir-126-5p    | 0.415572504  | 0.068414995 | 0.729389118  | 0.000263001 |
| mir-126-5p    | let-7f-1-5p   | 0.415572504  | 0.068414995 | 0.729389118  | 0.000263001 |
| let-7a-3-5p   | mir-24-2-3p   | 0.690289903  | 0.000755182 | 0.870109809  | 6.18E-07    |
| let-7a-3-5p   | mir-24-1-3p   | 0.690289903  | 0.000755182 | 0.870109809  | 6.18E-07    |
| let-7a-2-5p   | mir-24-2-3p   | 0.690289903  | 0.000755182 | 0.870109809  | 6.18E-07    |
| let-7a-2-5p   | mir-24-1-3p   | 0.690289903  | 0.000755182 | 0.870109809  | 6.18E-07    |
| let-7a-1-5p   | mir-24-2-3p   | 0.690289903  | 0.000755182 | 0.870109809  | 6.18E-07    |
| let-7a-1-5p   | mir-24-1-3p   | 0.690289903  | 0.000755182 | 0.870109809  | 6.18E-07    |
| mir-340-5p    | mir-151a-3p   | 0.67690571   | 0.001045625 | 0.863756742  | 9.27E-07    |
| mir-181b-2-5p | mir-20b-5p    | 0.57835604   | 0.007555308 | 0.173659983  | 0.464036677 |
| mir-181b-1-5p | mir-20b-5p    | 0.57835604   | 0.007555308 | 0.173659983  | 0.464036677 |
| mir-191-5p    | mir-20b-5p    | -0.044661362 | 0.85168912  | -0.484738168 | 0.030301255 |
| mir-15a-5p    | mir-374b-5p   | -0.185351318 | 0.43400395  | -0.586213681 | 0.006599599 |
| let-7b-5p     | mir-30e-5p    | 0.80290285   | 2.03E-05    | 0.552857121  | 0.011464973 |
| let-7b-5p     | mir-320a      | 0.92468136   | 5.62E-09    | 0.813221103  | 1.30E-05    |
| mir-181a-2-5p | mir-1307-3p   | 0.113260795  | 0.634474706 | 0.53516331   | 0.015036381 |
| mir-1307-3p   | mir-181a-1-5p | 0.113260795  | 0.634474706 | 0.53516331   | 0.015036381 |
| mir-181a-2-5p | mir-191-5p    | 0.73450038   | 0.000226155 | 0.889956275  | 1.50E-07    |
| mir-191-5p    | mir-181a-1-5p | 0.73450038   | 0.000226155 | 0.889956275  | 1.50E-07    |
| mir-144-3p    | let-7d-5p     | -0.202142303 | 0.392732039 | -0.596277574 | 0.005522626 |
| let-7a-3-5p   | mir-27a-3p    | -0.099641991 | 0.675974417 | 0.36444841   | 0.114149171 |
| let-7a-2-5p   | mir-27a-3p    | -0.099641991 | 0.675974417 | 0.36444841   | 0.114149171 |
| let-7a-1-5p   | mir-27a-3p    | -0.099641991 | 0.675974417 | 0.36444841   | 0.114149171 |
| mir-423-3p    | mir-1307-3p   | 0.462015486  | 0.040280628 | 0.753792593  | 0.000123952 |
| mir-30d-5p    | mir-148b-3p   | 0.496966515  | 0.025799947 | 0.772598297  | 6.54E-05    |
| mir-744-5p    | mir-139-5p    | 0.498215723  | 0.025371607 | 0.773070335  | 6.43E-05    |
| mir-451a      | mir-199a-2-3p | -0.297598894 | 0.202551166 | -0.657193852 | 0.00164124  |
| mir-451a      | mir-199a-1-3p | -0.297598894 | 0.202551166 | -0.657193852 | 0.00164124  |
| mir-451a      | mir-199b-3p   | -0.297598894 | 0.202551166 | -0.657193852 | 0.00164124  |
| mir-16-2-5p   | mir-122-5p    | 0.089925602  | 0.70615126  | -0.371367054 | 0.106933348 |
| mir-122-5p    | mir-16-1-5p   | 0.089925602  | 0.70615126  | -0.371367054 | 0.106933348 |
| mir-122-5p    | mir-106b-3p   | 0.042810055  | 0.857775694 | -0.411414901 | 0.071511946 |
| mir-20b-5p    | mir-15b-5p    | 0.627463677  | 0.003060724 | 0.251723597  | 0.284342065 |
| mir-543       | mir-99a-5p    | 0.089930992  | 0.706134397 | 0.515188781  | 0.020089217 |
| mir-151a-3p   | mir-374b-5p   | 0.546193131  | 0.012719062 | 0.797655027  | 2.52E-05    |
| mir-222-3p    | mir-122-5p    | 0.123124637  | 0.605051266 | -0.340792308 | 0.141461142 |
| mir-103a-2-3p | mir-28-5p     | 0.684720509  | 0.000866421 | 0.86590072   | 8.10E-07    |
| mir-103a-1-3p | mir-28-5p     | 0.684720509  | 0.000866421 | 0.86590072   | 8.10E-07    |
| mir-103a-2-3p | mir-320a      | 0.38099709   | 0.097447279 | -0.07702292  | 0.746878959 |
| mir-103a-1-3p | mir-320a      | 0.38099709   | 0.097447279 | -0.07702292  | 0.746878959 |
| let-7i-5p     | mir-27a-3p    | 0.162701982  | 0.493115007 | 0.566525858  | 0.009205192 |
| mir-146b-5p   | mir-423-3p    | 0.554551007  | 0.011162721 | 0.801530702  | 2.15E-05    |
| mir-122-5p    | mir-543       | 0.082900877  | 0.72823755  | 0.508515691  | 0.022049998 |
| mir-103a-2-3p | mir-16-2-5p   | 0.255490467  | 0.276953507 | -0.212645312 | 0.368065959 |
| mir-103a-2-3p | mir-16-1-5p   | 0.255490467  | 0.276953507 | -0.212645312 | 0.368065959 |
| mir-16-2-5p   | mir-103a-1-3p | 0.255490467  | 0.276953507 | -0.212645312 | 0.368065959 |
| mir-103a-1-3p | mir-16-1-5p   | 0.255490467  | 0.276953507 | -0.212645312 | 0.368065959 |
| mir-128-1-3p  | mir-106b-3p   | 0.049120403  | 0.837062778 | -0.40366682  | 0.077561652 |
| mir-106b-3p   | mir-128-2-3p  | 0.049120403  | 0.837062778 | -0.40366682  | 0.077561652 |
| mir-222-3p    | mir-93-5p     | 0.761133387  | 9.72E-05    | 0.900635612  | 6.22E-08    |

|               |               |              |             |              |             |
|---------------|---------------|--------------|-------------|--------------|-------------|
| mir-125a-5p   | mir-10a-5p    | 0.352669297  | 0.127228679 | 0.688486448  | 0.000789797 |
| mir-16-2-5p   | mir-25-3p     | 0.974763242  | 3.60E-13    | 0.93583948   | 1.38E-09    |
| mir-25-3p     | mir-16-1-5p   | 0.974763242  | 3.60E-13    | 0.93583948   | 1.38E-09    |
| mir-10b-5p    | mir-126-5p    | 0.259306424  | 0.269591755 | -0.207799232 | 0.379335229 |
| mir-27b-3p    | mir-7-3-5p    | -0.240695934 | 0.306665482 | -0.617845332 | 0.003695636 |
| mir-27b-3p    | mir-7-1-5p    | -0.240695934 | 0.306665482 | -0.617845332 | 0.003695636 |
| mir-27b-3p    | mir-7-2-5p    | -0.240695934 | 0.306665482 | -0.617845332 | 0.003695636 |
| mir-30a-5p    | mir-23a-3p    | 0.104991658  | 0.659557057 | 0.523516274  | 0.017839861 |
| mir-24-2-3p   | let-7d-5p     | 0.5604583    | 0.010158757 | 0.803807324  | 1.96E-05    |
| let-7d-5p     | mir-24-1-3p   | 0.5604583    | 0.010158757 | 0.803807324  | 1.96E-05    |
| mir-103a-2-3p | mir-143-3p    | -0.421679734 | 0.064049782 | 0.026005746  | 0.91333694  |
| mir-143-3p    | mir-103a-1-3p | -0.421679734 | 0.064049782 | 0.026005746  | 0.91333694  |
| mir-144-3p    | mir-1307-3p   | -0.615485339 | 0.003867057 | -0.831609088 | 5.51E-06    |
| mir-340-5p    | mir-223-3p    | 0.7412168    | 0.000184513 | 0.891338391  | 1.34E-07    |
| mir-182-5p    | mir-30d-5p    | -0.031231696 | 0.896004558 | -0.467138163 | 0.037835247 |
| mir-103a-2-3p | mir-221-3p    | 0.605972093  | 0.0046263   | 0.826707815  | 7.00E-06    |
| mir-103a-1-3p | mir-221-3p    | 0.605972093  | 0.0046263   | 0.826707815  | 7.00E-06    |
| mir-98-5p     | mir-30a-5p    | -0.113064382 | 0.635066184 | 0.346095651  | 0.134974259 |
| mir-181b-2-5p | mir-486-2-5p  | 0.497444433  | 0.025635405 | 0.071282197  | 0.765216811 |
| mir-181b-1-5p | mir-486-2-5p  | 0.497444433  | 0.025635405 | 0.071282197  | 0.765216811 |
| mir-423-3p    | mir-486-2-5p  | -0.417548817 | 0.066978669 | -0.725337621 | 0.000295739 |
| mir-30c-1-5p  | mir-186-5p    | -0.314400832 | 0.177002476 | 0.14746772   | 0.534969276 |
| mir-186-5p    | mir-30c-2-5p  | -0.314400832 | 0.177002476 | 0.14746772   | 0.534969276 |
| mir-103a-2-3p | mir-101-1-3p  | 0.30421044   | 0.192220913 | -0.158468531 | 0.504582484 |
| mir-103a-2-3p | mir-101-2-3p  | 0.30421044   | 0.192220913 | -0.158468531 | 0.504582484 |
| mir-101-1-3p  | mir-103a-1-3p | 0.30421044   | 0.192220913 | -0.158468531 | 0.504582484 |
| mir-103a-1-3p | mir-101-2-3p  | 0.30421044   | 0.192220913 | -0.158468531 | 0.504582484 |
| mir-486-2-5p  | norepi        | 0.148181662  | 0.532971962 | -0.313709292 | 0.178008452 |
| mir-26a-2-5p  | mir-125a-5p   | 0.828510451  | 6.42E-06    | 0.61038407   | 0.004260176 |
| mir-125a-5p   | mir-26a-1-5p  | 0.828510451  | 6.42E-06    | 0.61038407   | 0.004260176 |
| mir-28-5p     | mir-20b-5p    | -0.042116736 | 0.86005714  | -0.474381373 | 0.034576177 |
| mir-151a-5p   | mir-374b-5p   | 0.447197113  | 0.04804676  | 0.741883899  | 0.000180761 |
| mir-98-5p     | mir-24-2-3p   | 0.582214076  | 0.007072836 | 0.814083687  | 1.26E-05    |
| mir-98-5p     | mir-24-1-3p   | 0.582214076  | 0.007072836 | 0.814083687  | 1.26E-05    |
| mir-451a      | mir-148a-3p   | 0.29014444   | 0.214633973 | -0.172649907 | 0.46667992  |
| let-7i-5p     | mir-3615      | 0.268538178  | 0.252294176 | -0.194929293 | 0.410187789 |
| mir-425-5p    | mir-186-5p    | 0.870567627  | 6.00E-07    | 0.697646727  | 0.000626957 |
| mir-361-5p    | let-7d-5p     | 0.670871059  | 0.001204533 | 0.857728007  | 1.34E-06    |
| mir-22-3p     | mir-7-3-5p    | 0.790101269  | 3.41E-05    | 0.536633946  | 0.014709146 |
| mir-22-3p     | mir-7-1-5p    | 0.790101269  | 3.41E-05    | 0.536633946  | 0.014709146 |
| mir-22-3p     | mir-7-2-5p    | 0.790101269  | 3.41E-05    | 0.536633946  | 0.014709146 |
| mir-629-5p    | mir-30d-5p    | -0.045243106 | 0.849778161 | -0.47578454  | 0.033970953 |
| mir-192-5p    | mir-320a      | 0.871421014  | 5.67E-07    | 0.699766613  | 0.000593633 |
| mir-144-3p    | mir-25-3p     | 0.92404411   | 6.05E-09    | 0.815744213  | 1.17E-05    |
| mir-182-5p    | mir-186-5p    | 0.84685989   | 2.49E-06    | 0.648838938  | 0.001968211 |
| mir-29a-3p    | let-7f-2-5p   | -0.109518243 | 0.645781352 | 0.346688559  | 0.134262315 |
| mir-29a-3p    | let-7f-1-5p   | -0.109518243 | 0.645781352 | 0.346688559  | 0.134262315 |
| mir-99b-5p    | mir-10a-5p    | 0.459200696  | 0.041675411 | 0.747737897  | 0.000150544 |
| mir-103a-2-3p | mir-191-5p    | 0.827569576  | 6.72E-06    | 0.929082519  | 3.32E-09    |
| mir-103a-1-3p | mir-191-5p    | 0.827569576  | 6.72E-06    | 0.929082519  | 3.32E-09    |
| mir-92a-2-3p  | mir-192-5p    | 0.553795902  | 0.011296652 | 0.151689179  | 0.523209759 |
| mir-192-5p    | mir-92a-1-3p  | 0.553795902  | 0.011296652 | 0.151689179  | 0.523209759 |
| mir-10b-5p    | mir-107       | -0.030670817 | 0.897862735 | 0.413271286  | 0.070116445 |
| mir-361-5p    | mir-744-5p    | 0.810614933  | 1.46E-05    | 0.921469529  | 8.09E-09    |
| let-7f-2-5p   | mir-148b-3p   | 0.252235854  | 0.283330204 | 0.621466508  | 0.003444887 |
| mir-148b-3p   | let-7f-1-5p   | 0.252235854  | 0.283330204 | 0.621466508  | 0.003444887 |
| mir-451a      | mir-20b-5p    | 0.909569088  | 2.76E-08    | 0.963615613  | 9.30E-12    |
| mir-181a-2-5p | mir-106b-3p   | 0.025115179  | 0.916294564 | -0.416969439 | 0.067397373 |
| mir-106b-3p   | mir-181a-1-5p | 0.025115179  | 0.916294564 | -0.416969439 | 0.067397373 |
| mir-199a-2-3p | mir-486-2-5p  | -0.285705154 | 0.222050375 | -0.642840594 | 0.002235167 |
| mir-486-2-5p  | mir-199a-1-3p | -0.285705154 | 0.222050375 | -0.642840594 | 0.002235167 |
| mir-486-2-5p  | mir-199b-3p   | -0.285705154 | 0.222050375 | -0.642840594 | 0.002235167 |
| mir-106b-3p   | mir-150-5p    | 0.0202374    | 0.932511762 | 0.453625861  | 0.044547764 |
| mir-16-2-5p   | mir-192-5p    | 0.895527765  | 9.58E-08    | 0.753152596  | 0.000126557 |

|               |               |              |             |              |             |
|---------------|---------------|--------------|-------------|--------------|-------------|
| mir-192-5p    | mir-16-1-5p   | 0.895527765  | 9.58E-08    | 0.753152596  | 0.000126557 |
| mir-92a-2-3p  | let-7i-5p     | -0.0960414   | 0.687104488 | -0.511721214 | 0.021089981 |
| let-7i-5p     | mir-92a-1-3p  | -0.0960414   | 0.687104488 | -0.511721214 | 0.021089981 |
| mir-423-5p    | mir-629-5p    | 0.647943029  | 0.002006298 | 0.29418586   | 0.208025779 |
| mir-19b-2-3p  | mir-629-5p    | 0.877711235  | 3.70E-07    | 0.715070528  | 0.000394653 |
| mir-19b-1-3p  | mir-629-5p    | 0.877711235  | 3.70E-07    | 0.715070528  | 0.000394653 |
| mir-361-5p    | mir-24-2-3p   | 0.75977854   | 0.00010173  | 0.898405509  | 7.53E-08    |
| mir-361-5p    | mir-24-1-3p   | 0.75977854   | 0.00010173  | 0.898405509  | 7.53E-08    |
| mir-451a      | mir-20a-5p    | 0.907482677  | 3.36E-08    | 0.779819231  | 5.03E-05    |
| mir-374b-5p   | mir-20b-5p    | 0.123901595  | 0.60275758  | -0.330694056 | 0.154411793 |
| mir-103a-2-3p | mir-146a-5p   | 0.623910771  | 0.003283748 | 0.833496641  | 5.02E-06    |
| mir-146a-5p   | mir-103a-1-3p | 0.623910771  | 0.003283748 | 0.833496641  | 5.02E-06    |
| mir-126-3p    | mir-146b-5p   | 0.774926303  | 6.01E-05    | 0.905222265  | 4.14E-08    |
| mir-126-3p    | mir-221-3p    | 0.784047463  | 4.30E-05    | 0.909280427  | 2.83E-08    |
| mir-223-3p    | mir-30a-5p    | -0.122910586 | 0.605683798 | 0.33085155   | 0.154203712 |
| mir-423-3p    | mir-20b-5p    | -0.384304343 | 0.094335794 | -0.702542092 | 0.000552284 |
| mir-92a-2-3p  | let-7a-3-5p   | -0.657855743 | 0.001617414 | -0.849897882 | 2.10E-06    |
| mir-92a-2-3p  | let-7a-2-5p   | -0.657855743 | 0.001617414 | -0.849897882 | 2.10E-06    |
| mir-92a-2-3p  | let-7a-1-5p   | -0.657855743 | 0.001617414 | -0.849897882 | 2.10E-06    |
| let-7a-3-5p   | mir-92a-1-3p  | -0.657855743 | 0.001617414 | -0.849897882 | 2.10E-06    |
| let-7a-2-5p   | mir-92a-1-3p  | -0.657855743 | 0.001617414 | -0.849897882 | 2.10E-06    |
| let-7a-1-5p   | mir-92a-1-3p  | -0.657855743 | 0.001617414 | -0.849897882 | 2.10E-06    |
| mir-126-3p    | mir-744-5p    | 0.641170772  | 0.002314643 | 0.841620212  | 3.30E-06    |
| mir-223-3p    | mir-20b-5p    | -0.031331463 | 0.89567409  | -0.460426524 | 0.041063474 |
| mir-27b-3p    | mir-151a-3p   | 0.622456519  | 0.003378847 | 0.832262618  | 5.34E-06    |
| mir-126-3p    | mir-21-5p     | 0.823690947  | 8.09E-06    | 0.926686091  | 4.44E-09    |
| mir-26a-2-5p  | mir-1307-3p   | 0.374184461  | 0.104091637 | 0.695899631  | 0.0006556   |
| mir-1307-3p   | mir-26a-1-5p  | 0.374184461  | 0.104091637 | 0.695899631  | 0.0006556   |
| mir-101-1-3p  | cpeptide      | -0.200406306 | 0.39689512  | 0.25691111   | 0.274198322 |
| mir-101-2-3p  | cpeptide      | -0.200406306 | 0.39689512  | 0.25691111   | 0.274198322 |
| let-7d-5p     | mir-27a-3p    | -0.210737855 | 0.372478695 | 0.246642928  | 0.294498673 |
| mir-584-5p    | mir-10a-5p    | -0.055545814 | 0.816077802 | 0.388535925  | 0.090461551 |
| mir-451a      | mir-425-5p    | 0.6919231    | 0.000724952 | 0.36794621   | 0.110458653 |
| mir-143-3p    | mir-125b-1-5p | 0.356440946  | 0.122930047 | -0.092106196 | 0.699340116 |
| mir-143-3p    | mir-125b-2-5p | 0.356440946  | 0.122930047 | -0.092106196 | 0.699340116 |
| mir-182-5p    | let-7d-3p     | -0.448299396 | 0.047432315 | -0.738438878 | 0.000200861 |
| mir-126-3p    | mir-223-3p    | 0.71983457   | 0.00034573  | 0.879019786  | 3.37E-07    |
| mir-122-5p    | mir-151a-5p   | -0.43055943  | 0.058081859 | 0.003527447  | 0.988224114 |
| mir-98-5p     | mir-106b-3p   | -0.222288693 | 0.346216177 | -0.598081885 | 0.005345782 |
| mir-98-5p     | mir-3615      | -0.326773193 | 0.159654978 | -0.665844399 | 0.00135198  |
| mir-122-5p    | mir-30d-5p    | -0.325893753 | 0.16084769  | 0.124962678  | 0.599630917 |
| mir-143-3p    | let-7d-5p     | -0.164730159 | 0.487666734 | 0.288874678  | 0.216738392 |
| mir-3615      | mir-151a-3p   | -0.147322551 | 0.535375821 | -0.545481187 | 0.012859343 |
| mir-199a-1-5p | mir-151a-3p   | 0.290338563  | 0.214313435 | 0.642247118  | 0.002263148 |
| mir-151a-3p   | mir-199a-2-5p | 0.290338563  | 0.214313435 | 0.642247118  | 0.002263148 |
| mir-584-5p    | mir-28-3p     | 0.407012805  | 0.074904111 | 0.713840856  | 0.000408197 |
| mir-26b-5p    | mir-10b-5p    | -0.143185899 | 0.547019866 | 0.308166227  | 0.18621247  |
| mir-146b-5p   | mir-148a-3p   | -0.170361278 | 0.47269711  | 0.282712359  | 0.227143697 |
| mir-26a-2-5p  | mir-223-3p    | 0.772998418  | 6.44E-05    | 0.903358832  | 4.90E-08    |
| mir-223-3p    | mir-26a-1-5p  | 0.772998418  | 6.44E-05    | 0.903358832  | 4.90E-08    |
| mir-10b-5p    | mir-543       | 0.412925418  | 0.070374885 | -0.023209486 | 0.922626994 |
| mir-222-3p    | mir-29a-3p    | 0.700062279  | 0.000589107 | 0.385037715  | 0.093655802 |
| mir-140-5p    | cpeptide      | -0.24577315  | 0.296259401 | 0.207488677  | 0.380063949 |
| mir-26a-2-5p  | let-7a-3-5p   | 0.953595834  | 8.00E-11    | 0.88719043   | 1.85E-07    |
| mir-26a-2-5p  | let-7a-2-5p   | 0.953595834  | 8.00E-11    | 0.88719043   | 1.85E-07    |
| mir-26a-2-5p  | let-7a-1-5p   | 0.953595834  | 8.00E-11    | 0.88719043   | 1.85E-07    |
| let-7a-3-5p   | mir-26a-1-5p  | 0.953595834  | 8.00E-11    | 0.88719043   | 1.85E-07    |
| let-7a-2-5p   | mir-26a-1-5p  | 0.953595834  | 8.00E-11    | 0.88719043   | 1.85E-07    |
| let-7a-1-5p   | mir-26a-1-5p  | 0.953595834  | 8.00E-11    | 0.88719043   | 1.85E-07    |
| mir-103a-2-3p | mir-23a-3p    | 0.559611518  | 0.010297989 | 0.798179541  | 2.47E-05    |
| mir-103a-1-3p | mir-23a-3p    | 0.559611518  | 0.010297989 | 0.798179541  | 2.47E-05    |
| mir-222-3p    | mir-20a-5p    | 0.829843795  | 6.02E-06    | 0.928674262  | 3.50E-09    |
| mir-143-3p    | mir-223-3p    | -0.086055393 | 0.7182928   | 0.358135129  | 0.12103327  |
| mir-199a-1-5p | mir-126-5p    | 0.354607225  | 0.125006841 | 0.681296262  | 0.000941455 |

|               |               |              |             |              |             |
|---------------|---------------|--------------|-------------|--------------|-------------|
| mir-126-5p    | mir-199a-2-5p | 0.354607225  | 0.125006841 | 0.681296262  | 0.000941455 |
| mir-27b-3p    | mir-374b-5p   | 0.535531119  | 0.014953996 | 0.784892272  | 4.16E-05    |
| mir-15a-5p    | mir-15b-5p    | 0.413931056  | 0.069625424 | -0.019703223 | 0.934289413 |
| mir-423-3p    | mir-24-2-3p   | 0.36984178   | 0.108494995 | 0.690087573  | 0.000759001 |
| mir-423-3p    | mir-24-1-3p   | 0.36984178   | 0.108494995 | 0.690087573  | 0.000759001 |
| mir-423-3p    | mir-28-5p     | 0.409701599  | 0.072818234 | 0.71384601   | 0.00040814  |
| mir-106a-5p   | mir-128-1-3p  | 0.110957431  | 0.641424385 | -0.33479083  | 0.149062313 |
| mir-106a-5p   | mir-128-2-3p  | 0.110957431  | 0.641424385 | -0.33479083  | 0.149062313 |
| mir-21-5p     | mir-151a-3p   | 0.706813575  | 0.000493431 | 0.871724581  | 5.56E-07    |
| mir-27b-3p    | mir-28-5p     | 0.627540201  | 0.003056063 | 0.832587571  | 5.25E-06    |
| mir-92a-2-3p  | mir-1307-3p   | -0.390497417 | 0.088705907 | -0.70210309  | 0.000558657 |
| mir-1307-3p   | mir-92a-1-3p  | -0.390497417 | 0.088705907 | -0.70210309  | 0.000558657 |
| mir-532-5p    | mir-10b-5p    | -0.170365586 | 0.472685747 | 0.279359324  | 0.232939778 |
| mir-125a-5p   | mir-148a-3p   | -0.443292718 | 0.05027241  | -0.017298516 | 0.94229547  |
| mir-423-3p    | let-7b-5p     | -0.417135615 | 0.067277081 | -0.717701728 | 0.000366952 |
| mir-423-5p    | mir-20b-5p    | 0.742701981  | 0.000176249 | 0.460409132  | 0.041072107 |
| let-7a-3-5p   | mir-224-5p    | 0.346822303  | 0.134102087 | 0.67526828   | 0.001086884 |
| let-7a-2-5p   | mir-224-5p    | 0.346822303  | 0.134102087 | 0.67526828   | 0.001086884 |
| mir-224-5p    | let-7a-1-5p   | 0.346822303  | 0.134102087 | 0.67526828   | 0.001086884 |
| mir-126-3p    | mir-629-5p    | -0.411899337 | 0.071145794 | -0.714324402 | 0.000402825 |
| mir-532-5p    | mir-192-5p    | 0.825647153  | 7.37E-06    | 0.614858726  | 0.003913662 |
| mir-340-5p    | mir-106b-3p   | -0.277401715 | 0.236367621 | -0.630595    | 0.002874746 |
| mir-7-3-5p    | mir-151a-3p   | 0.0218194    | 0.927248966 | -0.409868055 | 0.072690545 |
| mir-7-1-5p    | mir-151a-3p   | 0.0218194    | 0.927248966 | -0.409868055 | 0.072690545 |
| mir-151a-3p   | mir-7-2-5p    | 0.0218194    | 0.927248966 | -0.409868055 | 0.072690545 |
| mir-122-5p    | mir-28-5p     | 0.052023513  | 0.827567416 | 0.46912741   | 0.03691736  |
| mir-19b-2-3p  | mir-98-5p     | 0.043789044  | 0.854556071 | -0.390826522 | 0.088413814 |
| mir-98-5p     | mir-19b-1-3p  | 0.043789044  | 0.854556071 | -0.390826522 | 0.088413814 |
| mir-3615      | mir-122-5p    | 0.287799024  | 0.218531687 | -0.158772402 | 0.503755111 |
| mir-10b-5p    | mir-93-5p     | -0.245848694 | 0.29610622  | 0.20235931   | 0.392213342 |
| mir-26b-5p    | mir-98-5p     | 0.012698507  | 0.957624634 | -0.416286227 | 0.06789364  |
| mir-144-3p    | mir-221-3p    | -0.417286218 | 0.067168201 | -0.716367302 | 0.000380786 |
| mir-144-3p    | mir-423-5p    | 0.704406042  | 0.000525909 | 0.397244823  | 0.082857876 |
| mir-584-5p    | mir-375       | -0.163515961 | 0.490924853 | 0.282372065  | 0.227727607 |
| mir-584-5p    | mir-125b-1-5p | -0.227786887 | 0.334104469 | 0.219531849  | 0.352383956 |
| mir-584-5p    | mir-125b-2-5p | -0.227786887 | 0.334104469 | 0.219531849  | 0.352383956 |
| mir-199a-1-5p | mir-106b-3p   | -0.566318397 | 0.009236546 | -0.799454114 | 2.34E-05    |
| mir-106b-3p   | mir-199a-2-5p | -0.566318397 | 0.009236546 | -0.799454114 | 2.34E-05    |
| mir-146b-5p   | mir-191-5p    | 0.662069628  | 0.00147243  | 0.848680062  | 2.25E-06    |
| mir-1307-3p   | mir-126-5p    | -0.134997098 | 0.57040169  | 0.308415817  | 0.185837672 |
| mir-7-3-5p    | mir-28-3p     | -0.252781062 | 0.282255707 | -0.612530214 | 0.004090943 |
| mir-7-1-5p    | mir-28-3p     | -0.252781062 | 0.282255707 | -0.612530214 | 0.004090943 |
| mir-7-2-5p    | mir-28-3p     | -0.252781062 | 0.282255707 | -0.612530214 | 0.004090943 |
| mir-122-5p    | mir-93-5p     | 0.030820601  | 0.897366453 | -0.399973285 | 0.080575982 |
| let-7i-5p     | mir-25-3p     | 0.468932354  | 0.03700659  | 0.054847013  | 0.818354471 |
| mir-629-5p    | let-7d-3p     | -0.468959469 | 0.036994176 | -0.745263008 | 0.000162743 |
| mir-181a-2-5p | mir-27a-3p    | 0.103951616  | 0.662737368 | 0.505975224  | 0.022835212 |
| mir-27a-3p    | mir-181a-1-5p | 0.103951616  | 0.662737368 | 0.505975224  | 0.022835212 |
| let-7i-5p     | mir-451a      | 0.409403124  | 0.073047614 | -0.017968124 | 0.940065557 |
| mir-22-3p     | mir-92a-2-3p  | 0.507484171  | 0.022366196 | 0.106354433  | 0.655398376 |
| mir-22-3p     | mir-92a-1-3p  | 0.507484171  | 0.022366196 | 0.106354433  | 0.655398376 |
| mir-584-5p    | mir-27a-3p    | -0.381056064 | 0.097391148 | 0.05068813   | 0.831932346 |
| mir-425-5p    | let-7b-5p     | 0.707451164  | 0.000485121 | 0.405494231  | 0.076101685 |
| mir-23a-3p    | mir-28-5p     | 0.715576728  | 0.00038919  | 0.874038428  | 4.76E-07    |
| mir-629-5p    | mir-23a-3p    | -0.449754196 | 0.046630623 | -0.733153697 | 0.000235406 |
| let-7i-5p     | mir-106a-5p   | 0.410372933  | 0.072304275 | -0.015023574 | 0.949874415 |
| mir-224-5p    | mir-191-5p    | 0.430663409  | 0.058014572 | 0.721813823  | 0.00032698  |
| mir-29a-3p    | mir-151a-5p   | -0.103209887 | 0.66500888  | 0.333782915  | 0.150366268 |
| mir-103a-2-3p | mir-122-5p    | -0.067349468 | 0.777849739 | 0.365225279  | 0.113321946 |
| mir-122-5p    | mir-103a-1-3p | -0.067349468 | 0.777849739 | 0.365225279  | 0.113321946 |
| mir-24-2-3p   | cpeptide      | 0.107708241  | 0.651276708 | -0.329441106 | 0.156074129 |
| mir-24-1-3p   | cpeptide      | 0.107708241  | 0.651276708 | -0.329441106 | 0.156074129 |
| mir-532-5p    | mir-148b-3p   | 0.290055783  | 0.214780468 | -0.150452815 | 0.526641239 |
| mir-126-3p    | mir-584-5p    | 0.309217435  | 0.184637367 | 0.646815348  | 0.002055113 |

|               |               |              |             |              |             |
|---------------|---------------|--------------|-------------|--------------|-------------|
| mir-29a-3p    | let-7a-3-5p   | -0.001021902 | 0.996588419 | 0.420929848  | 0.064574155 |
| mir-29a-3p    | let-7a-2-5p   | -0.001021902 | 0.996588419 | 0.420929848  | 0.064574155 |
| mir-29a-3p    | let-7a-1-5p   | -0.001021902 | 0.996588419 | 0.420929848  | 0.064574155 |
| mir-744-5p    | mir-194-2-5p  | -0.698397945 | 0.000614971 | -0.392405585 | 0.087022177 |
| mir-744-5p    | mir-194-1-5p  | -0.698397945 | 0.000614971 | -0.392405585 | 0.087022177 |
| mir-17-5p     | mir-20b-5p    | 0.828770012  | 6.34E-06    | 0.625933732  | 0.003155166 |
| let-7f-2-5p   | mir-28-3p     | 0.529131424  | 0.016440307 | 0.777172769  | 5.54E-05    |
| let-7f-1-5p   | mir-28-3p     | 0.529131424  | 0.016440307 | 0.777172769  | 5.54E-05    |
| mir-29a-3p    | mir-7-3-5p    | 0.464563124  | 0.039049635 | 0.054012071  | 0.821076516 |
| mir-29a-3p    | mir-7-1-5p    | 0.464563124  | 0.039049635 | 0.054012071  | 0.821076516 |
| mir-29a-3p    | mir-7-2-5p    | 0.464563124  | 0.039049635 | 0.054012071  | 0.821076516 |
| mir-92a-2-3p  | mir-744-5p    | -0.733672342 | 0.000231806 | -0.882182082 | 2.69E-07    |
| mir-744-5p    | mir-92a-1-3p  | -0.733672342 | 0.000231806 | -0.882182082 | 2.69E-07    |
| mir-26b-5p    | mir-186-5p    | 0.965454357  | 5.87E-12    | 0.917307029  | 1.27E-08    |
| mir-122-5p    | mir-107       | 0.044142489  | 0.853394231 | -0.383921572 | 0.094692136 |
| mir-106a-5p   | mir-191-5p    | -0.158493486 | 0.504514513 | -0.543173709 | 0.013322612 |
| mir-224-5p    | mir-15b-5p    | -0.016865726 | 0.943736956 | 0.406899603  | 0.074992897 |
| mir-26b-5p    | cpeptide      | -0.231122241 | 0.326880522 | 0.210071799  | 0.374026581 |
| mir-425-5p    | mir-30c-1-5p  | -0.035257877 | 0.8826818   | 0.391062726  | 0.088204611 |
| mir-425-5p    | mir-30c-2-5p  | -0.035257877 | 0.8826818   | 0.391062726  | 0.088204611 |
| mir-26b-5p    | mir-629-5p    | 0.916083422  | 1.44E-08    | 0.806384985  | 1.76E-05    |
| mir-320a      | mir-363-3p    | 0.896070275  | 9.16E-08    | 0.763441855  | 8.99E-05    |
| mir-98-5p     | mir-363-3p    | -0.198066851 | 0.402543634 | -0.570313437 | 0.008647832 |
| mir-181a-2-5p | mir-20b-5p    | 0.14955371   | 0.529143244 | -0.288170293 | 0.217911622 |
| mir-20b-5p    | mir-181a-1-5p | 0.14955371   | 0.529143244 | -0.288170293 | 0.217911622 |
| mir-103a-2-3p | let-7f-2-5p   | 0.656311171  | 0.001673471 | 0.843608395  | 2.97E-06    |
| mir-103a-2-3p | let-7f-1-5p   | 0.656311171  | 0.001673471 | 0.843608395  | 2.97E-06    |
| let-7f-2-5p   | mir-103a-1-3p | 0.656311171  | 0.001673471 | 0.843608395  | 2.97E-06    |
| mir-103a-1-3p | let-7f-1-5p   | 0.656311171  | 0.001673471 | 0.843608395  | 2.97E-06    |
| mir-29a-3p    | mir-25-3p     | 0.52672657   | 0.017028515 | 0.137835114  | 0.562249093 |
| mir-21-5p     | mir-20b-5p    | -0.325889938 | 0.160852876 | -0.655451686 | 0.001705363 |
| mir-629-5p    | mir-28-5p     | -0.274137894 | 0.242154789 | -0.621737212 | 0.003426724 |
| mir-16-2-5p   | mir-20a-5p    | 0.950425138  | 1.43E-10    | 0.883119194  | 2.51E-07    |
| mir-20a-5p    | mir-16-1-5p   | 0.950425138  | 1.43E-10    | 0.883119194  | 2.51E-07    |
| let-7b-5p     | mir-484       | 0.733101106  | 0.000235774 | 0.453530472  | 0.044598205 |
| mir-151a-3p   | mir-125b-1-5p | -0.053872651 | 0.821531239 | 0.373350693  | 0.104926823 |
| mir-151a-3p   | mir-125b-2-5p | -0.053872651 | 0.821531239 | 0.373350693  | 0.104926823 |
| mir-10b-5p    | mir-1307-3p   | 0.117919086  | 0.620509893 | -0.316342927 | 0.174198043 |
| mir-22-3p     | mir-16-2-5p   | 0.844757356  | 2.79E-06    | 0.659292983  | 0.001566676 |
| mir-22-3p     | mir-16-1-5p   | 0.844757356  | 2.79E-06    | 0.659292983  | 0.001566676 |
| let-7a-3-5p   | mir-30a-5p    | 0.024471549  | 0.918432761 | 0.438523074  | 0.053097352 |
| let-7a-2-5p   | mir-30a-5p    | 0.024471549  | 0.918432761 | 0.438523074  | 0.053097352 |
| let-7a-1-5p   | mir-30a-5p    | 0.024471549  | 0.918432761 | 0.438523074  | 0.053097352 |
| let-7i-5p     | mir-143-3p    | -0.438873199 | 0.052885955 | -0.02503604  | 0.916557442 |
| let-7i-5p     | mir-363-3p    | 0.406696447  | 0.07515243  | -0.013933576 | 0.953507241 |
| mir-92a-2-3p  | mir-425-5p    | 0.372703969  | 0.105577985 | -0.053655966 | 0.822238077 |
| mir-425-5p    | mir-92a-1-3p  | 0.372703969  | 0.105577985 | -0.053655966 | 0.822238077 |
| mir-98-5p     | mir-101-1-3p  | -0.043877116 | 0.854266533 | -0.453556187 | 0.044584603 |
| mir-98-5p     | mir-101-2-3p  | -0.043877116 | 0.854266533 | -0.453556187 | 0.044584603 |
| mir-423-3p    | mir-15a-5p    | -0.516172534 | 0.019812299 | -0.7683743   | 7.58E-05    |
| mir-378a-3p   | mir-486-2-5p  | 0.837975282  | 4.00E-06    | 0.646423239  | 0.002072318 |
| mir-19b-2-3p  | mir-29a-3p    | 0.60923959   | 0.004352763 | 0.257057983  | 0.273914458 |
| mir-29a-3p    | mir-19b-1-3p  | 0.60923959   | 0.004352763 | 0.257057983  | 0.273914458 |
| mir-139-5p    | mir-20b-5p    | -0.000563273 | 0.998119532 | -0.418042682 | 0.066623309 |
| mir-144-3p    | mir-191-5p    | -0.080103274 | 0.737092291 | -0.481484288 | 0.031597027 |
| mir-146a-5p   | mir-199a-2-3p | 0.958801356  | 2.80E-11    | 0.982856996  | 1.14E-14    |
| mir-146a-5p   | mir-199a-1-3p | 0.958801356  | 2.80E-11    | 0.982856996  | 1.14E-14    |
| mir-146a-5p   | mir-199b-3p   | 0.958801356  | 2.80E-11    | 0.982856996  | 1.14E-14    |
| mir-17-5p     | mir-486-2-5p  | 0.810512406  | 1.47E-05    | 0.594183146  | 0.005733915 |
| mir-125a-5p   | mir-378a-3p   | -0.565242723 | 0.009400512 | -0.193624776 | 0.413389069 |
| mir-629-5p    | mir-93-5p     | 0.883214412  | 2.49E-07    | 0.737881763  | 0.000204285 |
| mir-15a-5p    | mir-484       | 0.585134928  | 0.006724601 | 0.222164223  | 0.346493285 |
| mir-106a-5p   | mir-425-5p    | 0.679713551  | 0.000977947 | 0.366469273  | 0.112006314 |
| mir-146a-5p   | mir-363-3p    | -0.397830921 | 0.082363719 | -0.698766872 | 0.000609157 |

|               |               |              |             |              |             |
|---------------|---------------|--------------|-------------|--------------|-------------|
| mir-451a      | mir-320a      | 0.904936006  | 4.25E-08    | 0.783798409  | 4.34E-05    |
| mir-140-5p    | mir-106b-3p   | 0.416814575  | 0.067509623 | 0.000285582  | 0.999046592 |
| mir-125b-1-5p | mir-128-1-3p  | -0.073554109 | 0.757944562 | 0.353821537  | 0.125904278 |
| mir-125b-1-5p | mir-128-2-3p  | -0.073554109 | 0.757944562 | 0.353821537  | 0.125904278 |
| mir-128-1-3p  | mir-125b-2-5p | -0.073554109 | 0.757944562 | 0.353821537  | 0.125904278 |
| mir-128-2-3p  | mir-125b-2-5p | -0.073554109 | 0.757944562 | 0.353821537  | 0.125904278 |
| mir-26a-2-5p  | mir-423-3p    | 0.752774154  | 0.00012812  | 0.890173408  | 1.47E-07    |
| mir-423-3p    | mir-26a-1-5p  | 0.752774154  | 0.00012812  | 0.890173408  | 1.47E-07    |
| mir-103a-2-3p | mir-185-5p    | 0.460416777  | 0.041068312 | 0.054443459  | 0.819669873 |
| mir-103a-1-3p | mir-185-5p    | 0.460416777  | 0.041068312 | 0.054443459  | 0.819669873 |
| mir-26a-2-5p  | mir-27a-3p    | -0.115307378 | 0.628324369 | 0.316224911  | 0.174367592 |
| mir-27a-3p    | mir-26a-1-5p  | -0.115307378 | 0.628324369 | 0.316224911  | 0.174367592 |
| mir-340-5p    | mir-28-3p     | 0.458201491  | 0.042179412 | 0.734418182  | 0.000226711 |
| mir-16-2-5p   | mir-98-5p     | -0.058124424 | 0.80768919  | -0.463214736 | 0.039697475 |
| mir-98-5p     | mir-16-1-5p   | -0.058124424 | 0.80768919  | -0.463214736 | 0.039697475 |
| mir-21-5p     | mir-629-5p    | -0.45205555  | 0.045383733 | -0.730820939 | 0.000252197 |
| mir-10b-5p    | mir-25-3p     | -0.067674973 | 0.776802048 | 0.358395875  | 0.120743212 |
| mir-224-5p    | let-7d-5p     | 0.287298359  | 0.21936969  | 0.628099357  | 0.003022181 |
| mir-99a-5p    | mir-363-3p    | 0.291148519  | 0.212979439 | -0.141656261 | 0.551354358 |
| mir-21-5p     | mir-543       | 0.774324775  | 6.14E-05    | 0.528934147  | 0.016487938 |
| mir-423-5p    | mir-125b-1-5p | -0.042445501 | 0.858975168 | 0.379217396  | 0.099152298 |
| mir-423-5p    | mir-125b-2-5p | -0.042445501 | 0.858975168 | 0.379217396  | 0.099152298 |
| mir-484       | norepi        | 0.371838967  | 0.106453494 | -0.050160338 | 0.833658841 |
| mir-451a      | mir-126-5p    | 0.180305087  | 0.446838807 | -0.252673788 | 0.282466923 |
| mir-361-5p    | mir-148b-3p   | 0.118540672  | 0.618655762 | 0.507667544  | 0.022309724 |
| mir-106a-5p   | mir-126-5p    | 0.188843955  | 0.425236004 | -0.24391048  | 0.300051678 |
| mir-17-5p     | mir-26b-5p    | 0.881398765  | 2.85E-07    | 0.736249232  | 0.000214607 |
| mir-361-5p    | mir-15a-5p    | -0.689797448 | 0.000764504 | -0.858409158 | 1.28E-06    |
| mir-425-5p    | mir-320a      | 0.820357403  | 9.45E-06    | 0.615936946  | 0.003833754 |
| mir-194-2-5p  | mir-150-5p    | 0.346780508  | 0.134152144 | 0.664731725  | 0.00138659  |
| mir-194-1-5p  | mir-150-5p    | 0.346780508  | 0.134152144 | 0.664731725  | 0.00138659  |
| mir-374b-5p   | mir-99a-5p    | -0.092647235 | 0.697653561 | 0.333157307  | 0.15117961  |
| let-7i-5p     | mir-151a-5p   | 0.164311367  | 0.488789295 | 0.540461763  | 0.013884195 |
| mir-199a-1-5p | mir-20b-5p    | -0.350950341 | 0.129222829 | -0.66677192  | 0.001323687 |
| mir-199a-2-5p | mir-20b-5p    | -0.350950341 | 0.129222829 | -0.66677192  | 0.001323687 |
| mir-20a-5p    | norepi        | 0.191925286  | 0.417579808 | -0.238778461 | 0.310652274 |
| mir-93-5p     | norepi        | 0.186845066  | 0.430242408 | -0.243651619 | 0.300581034 |
| mir-221-3p    | cpeptide      | -0.069788784 | 0.770007499 | -0.467809396 | 0.037523564 |
| mir-192-5p    | mir-93-5p     | 0.83424834   | 4.83E-06    | 0.643847219  | 0.002188367 |
| mir-194-2-5p  | mir-30c-1-5p  | -0.448019436 | 0.047587799 | -0.045004426 | 0.850562099 |
| mir-194-2-5p  | mir-30c-2-5p  | -0.448019436 | 0.047587799 | -0.045004426 | 0.850562099 |
| mir-194-1-5p  | mir-30c-1-5p  | -0.448019436 | 0.047587799 | -0.045004426 | 0.850562099 |
| mir-194-1-5p  | mir-30c-2-5p  | -0.448019436 | 0.047587799 | -0.045004426 | 0.850562099 |
| mir-126-3p    | mir-543       | 0.804046171  | 1.94E-05    | 0.586841869  | 0.006527688 |
| mir-98-5p     | mir-7-3-5p    | -0.088999427 | 0.70905075  | -0.482464026 | 0.031202393 |
| mir-98-5p     | mir-7-1-5p    | -0.088999427 | 0.70905075  | -0.482464026 | 0.031202393 |
| mir-98-5p     | mir-7-2-5p    | -0.088999427 | 0.70905075  | -0.482464026 | 0.031202393 |
| mir-10b-5p    | mir-629-5p    | -0.184020587 | 0.437369552 | 0.245562709  | 0.29668637  |
| mir-10b-5p    | mir-24-2-3p   | 0.358026773  | 0.121153954 | -0.061619085 | 0.796352855 |
| mir-10b-5p    | mir-24-1-3p   | 0.358026773  | 0.121153954 | -0.061619085 | 0.796352855 |
| mir-320a      | mir-30e-5p    | 0.867072781  | 7.52E-07    | 0.708905497  | 0.00046661  |
| mir-26b-5p    | mir-486-2-5p  | 0.951892262  | 1.10E-10    | 0.888633191  | 1.66E-07    |
| mir-192-5p    | cpeptide      | -0.038232684 | 0.872857323 | 0.377459288  | 0.100857885 |
| mir-139-5p    | mir-30a-5p    | -0.115586984 | 0.627485921 | 0.308776762  | 0.185296559 |
| mir-25-3p     | mir-484       | 0.78999865   | 3.42E-05    | 0.562266413  | 0.009866572 |
| mir-103a-2-3p | mir-199a-2-3p | 0.662110748  | 0.001471071 | 0.843067869  | 3.06E-06    |
| mir-103a-2-3p | mir-199a-1-3p | 0.662110748  | 0.001471071 | 0.843067869  | 3.06E-06    |
| mir-103a-2-3p | mir-199b-3p   | 0.662110748  | 0.001471071 | 0.843067869  | 3.06E-06    |
| mir-199a-2-3p | mir-103a-1-3p | 0.662110748  | 0.001471071 | 0.843067869  | 3.06E-06    |
| mir-103a-1-3p | mir-199a-1-3p | 0.662110748  | 0.001471071 | 0.843067869  | 3.06E-06    |
| mir-103a-1-3p | mir-199b-3p   | 0.662110748  | 0.001471071 | 0.843067869  | 3.06E-06    |
| mir-199a-2-3p | let-7b-5p     | -0.403895207 | 0.077378058 | -0.697789001 | 0.000624672 |
| let-7b-5p     | mir-199a-1-3p | -0.403895207 | 0.077378058 | -0.697789001 | 0.000624672 |
| let-7b-5p     | mir-199b-3p   | -0.403895207 | 0.077378058 | -0.697789001 | 0.000624672 |



|               |               |              |             |              |             |
|---------------|---------------|--------------|-------------|--------------|-------------|
| mir-101-1-3p  | mir-20a-5p    | 0.965412861  | 5.93E-12    | 0.919546884  | 9.99E-09    |
| mir-20a-5p    | mir-101-2-3p  | 0.965412861  | 5.93E-12    | 0.919546884  | 9.99E-09    |
| mir-143-3p    | mir-150-5p    | 0.088352033  | 0.711079776 | -0.33221232  | 0.152413969 |
| mir-125b-1-5p | mir-28-5p     | 0.068715123  | 0.773456648 | 0.464139368  | 0.039252341 |
| mir-28-5p     | mir-125b-2-5p | 0.068715123  | 0.773456648 | 0.464139368  | 0.039252341 |
| mir-744-5p    | mir-28-5p     | 0.515875372  | 0.019895625 | 0.763413936  | 9.00E-05    |
| mir-146b-5p   | mir-223-3p    | 0.524190211  | 0.017667023 | 0.768123466  | 7.65E-05    |
| mir-144-3p    | mir-148b-3p   | 0.447955877  | 0.047623152 | 0.048517228  | 0.839038387 |
| let-7f-2-5p   | mir-143-3p    | -0.044183938 | 0.853257996 | 0.370773464  | 0.107539148 |
| mir-143-3p    | let-7f-1-5p   | -0.044183938 | 0.853257996 | 0.370773464  | 0.107539148 |
| mir-3615      | norepi        | -0.065291416 | 0.784482393 | -0.460976049 | 0.040791416 |
| let-7f-2-5p   | mir-224-5p    | 0.307751141  | 0.186836914 | 0.635871665  | 0.002582651 |
| mir-224-5p    | let-7f-1-5p   | 0.307751141  | 0.186836914 | 0.635871665  | 0.002582651 |
| let-7f-2-5p   | mir-181a-2-5p | 0.605756249  | 0.004644857 | 0.812735325  | 1.33E-05    |
| let-7f-2-5p   | mir-181a-1-5p | 0.605756249  | 0.004644857 | 0.812735325  | 1.33E-05    |
| mir-181a-2-5p | let-7f-1-5p   | 0.605756249  | 0.004644857 | 0.812735325  | 1.33E-05    |
| let-7f-1-5p   | mir-181a-1-5p | 0.605756249  | 0.004644857 | 0.812735325  | 1.33E-05    |
| mir-16-2-5p   | mir-425-5p    | 0.781692372  | 4.69E-05    | 0.548989922  | 0.012179899 |
| mir-425-5p    | mir-16-1-5p   | 0.781692372  | 4.69E-05    | 0.548989922  | 0.012179899 |
| mir-29a-3p    | let-7d-5p     | -0.193099107 | 0.414682867 | 0.232569972  | 0.323774011 |
| mir-223-3p    | mir-106b-3p   | -0.310979712 | 0.182017071 | -0.63746083  | 0.002499694 |
| mir-181b-2-5p | mir-106b-3p   | 0.460626748  | 0.040964186 | 0.065805741  | 0.782823475 |
| mir-181b-1-5p | mir-106b-3p   | 0.460626748  | 0.040964186 | 0.065805741  | 0.782823475 |
| mir-30c-1-5p  | let-7g-5p     | 0.145223744  | 0.541269352 | 0.52149214   | 0.018367113 |
| let-7g-5p     | mir-30c-2-5p  | 0.145223744  | 0.541269352 | 0.52149214   | 0.018367113 |
| mir-532-5p    | mir-30c-1-5p  | -0.621609908 | 0.003435255 | -0.287528486 | 0.218984247 |
| mir-532-5p    | mir-30c-2-5p  | -0.621609908 | 0.003435255 | -0.287528486 | 0.218984247 |
| mir-223-3p    | mir-486-2-5p  | -0.176321512 | 0.457108425 | -0.543876591 | 0.013180092 |
| mir-27b-3p    | mir-10a-5p    | 0.697562378  | 0.000628315 | 0.406273115  | 0.075485675 |
| mir-143-3p    | mir-375       | 0.191085313  | 0.419659497 | -0.233459757 | 0.321873482 |
| mir-29a-3p    | mir-26a-2-5p  | -0.07860404  | 0.74185078  | 0.338613089  | 0.144189073 |
| mir-29a-3p    | mir-26a-1-5p  | -0.07860404  | 0.74185078  | 0.338613089  | 0.144189073 |
| mir-27b-3p    | mir-126-5p    | 0.427795357  | 0.059892371 | 0.710627094  | 0.000445476 |
| mir-451a      | mir-185-5p    | 0.906810074  | 3.57E-08    | 0.792515584  | 3.10E-05    |
| mir-15b-5p    | norepi        | 0.458541847  | 0.04200721  | 0.064321789  | 0.787612285 |
| mir-27b-3p    | mir-15a-5p    | -0.528721041 | 0.016539514 | -0.769512812 | 7.29E-05    |
| mir-144-3p    | cpeptide      | -0.102433738 | 0.667388812 | 0.316607888  | 0.173817798 |
| mir-27b-3p    | norepi        | -0.124908806 | 0.599789499 | 0.295740092  | 0.205520719 |
| mir-92a-2-3p  | mir-423-3p    | -0.376967662 | 0.10133862  | -0.678569955 | 0.001005051 |
| mir-423-3p    | mir-92a-1-3p  | -0.376967662 | 0.10133862  | -0.678569955 | 0.001005051 |
| mir-223-3p    | mir-128-1-3p  | 0.568918283  | 0.008849842 | 0.791609819  | 3.21E-05    |
| mir-223-3p    | mir-128-2-3p  | 0.568918283  | 0.008849842 | 0.791609819  | 3.21E-05    |
| mir-7-3-5p    | mir-199a-2-3p | -0.246057723 | 0.295682622 | -0.591839524 | 0.00597818  |
| mir-7-3-5p    | mir-199a-1-3p | -0.246057723 | 0.295682622 | -0.591839524 | 0.00597818  |
| mir-7-3-5p    | mir-199b-3p   | -0.246057723 | 0.295682622 | -0.591839524 | 0.00597818  |
| mir-199a-2-3p | mir-7-1-5p    | -0.246057723 | 0.295682622 | -0.591839524 | 0.00597818  |
| mir-199a-2-3p | mir-7-2-5p    | -0.246057723 | 0.295682622 | -0.591839524 | 0.00597818  |
| mir-7-1-5p    | mir-199a-1-3p | -0.246057723 | 0.295682622 | -0.591839524 | 0.00597818  |
| mir-7-1-5p    | mir-199b-3p   | -0.246057723 | 0.295682622 | -0.591839524 | 0.00597818  |
| mir-199a-1-3p | mir-7-2-5p    | -0.246057723 | 0.295682622 | -0.591839524 | 0.00597818  |
| mir-7-2-5p    | mir-199b-3p   | -0.246057723 | 0.295682622 | -0.591839524 | 0.00597818  |
| mir-185-5p    | norepi        | 0.213480712  | 0.36614274  | -0.209061951 | 0.37638035  |
| mir-99b-5p    | mir-30a-5p    | 0.088209288  | 0.711527413 | 0.475400907  | 0.034135597 |
| let-7f-2-5p   | mir-30a-5p    | -0.001720001 | 0.994257871 | 0.402352612  | 0.078624415 |
| mir-30a-5p    | let-7f-1-5p   | -0.001720001 | 0.994257871 | 0.402352612  | 0.078624415 |
| mir-744-5p    | mir-224-5p    | 0.336885646  | 0.146377486 | 0.651936008  | 0.001841175 |
| mir-30c-1-5p  | mir-23a-3p    | 0.587527668  | 0.006449919 | 0.80099433   | 2.20E-05    |
| mir-23a-3p    | mir-30c-2-5p  | 0.587527668  | 0.006449919 | 0.80099433   | 2.20E-05    |
| mir-144-3p    | mir-744-5p    | -0.517235482 | 0.019516516 | -0.761591804 | 9.57E-05    |
| mir-361-5p    | mir-28-5p     | 0.624286354  | 0.003259552 | 0.820758191  | 9.27E-06    |
| mir-224-5p    | mir-15a-5p    | -0.19521191  | 0.409496028 | -0.554312213 | 0.011204936 |
| mir-148a-3p   | mir-128-1-3p  | 0.066172612  | 0.781640709 | 0.456676664  | 0.042957595 |
| mir-148a-3p   | mir-128-2-3p  | 0.066172612  | 0.781640709 | 0.456676664  | 0.042957595 |
| mir-103a-2-3p | mir-181a-2-5p | 0.764631953  | 8.63E-05    | 0.892372611  | 1.24E-07    |

|               |               |              |             |              |             |
|---------------|---------------|--------------|-------------|--------------|-------------|
| mir-103a-2-3p | mir-181a-1-5p | 0.764631953  | 8.63E-05    | 0.892372611  | 1.24E-07    |
| mir-181a-2-5p | mir-103a-1-3p | 0.764631953  | 8.63E-05    | 0.892372611  | 1.24E-07    |
| mir-103a-1-3p | mir-181a-1-5p | 0.764631953  | 8.63E-05    | 0.892372611  | 1.24E-07    |
| mir-26b-5p    | mir-151a-3p   | 0.011509052  | 0.961590938 | -0.392301197 | 0.087113674 |
| mir-27a-3p    | mir-30e-5p    | 0.437804988  | 0.053532933 | 0.714036702  | 0.000406014 |
| mir-199a-1-5p | mir-122-5p    | -0.202360681 | 0.392210068 | 0.216740219  | 0.358693828 |
| mir-122-5p    | mir-199a-2-5p | -0.202360681 | 0.392210068 | 0.216740219  | 0.358693828 |
| mir-106a-5p   | mir-532-5p    | 0.880741577  | 2.98E-07    | 0.947268064  | 2.47E-10    |
| mir-222-3p    | mir-186-5p    | 0.769707539  | 7.24E-05    | 0.894686215  | 1.03E-07    |
| mir-106a-5p   | mir-486-2-5p  | 0.957111409  | 3.99E-11    | 0.902402823  | 5.33E-08    |
| mir-126-3p    | mir-150-5p    | 0.34845715   | 0.132154414 | -0.061238161 | 0.797586674 |
| mir-30a-5p    | let-7d-3p     | 0.054810785  | 0.818472538 | 0.446094363  | 0.048667557 |
| mir-16-2-5p   | mir-148a-3p   | 0.2928952    | 0.210121327 | -0.122409763 | 0.607164819 |
| mir-148a-3p   | mir-16-1-5p   | 0.2928952    | 0.210121327 | -0.122409763 | 0.607164819 |
| mir-744-5p    | mir-30c-1-5p  | 0.78340962   | 4.40E-05    | 0.55768233   | 0.010620989 |
| mir-744-5p    | mir-30c-2-5p  | 0.78340962   | 4.40E-05    | 0.55768233   | 0.010620989 |
| mir-25-3p     | mir-199a-2-3p | -0.221143802 | 0.348769925 | -0.5709794   | 0.00855274  |
| mir-25-3p     | mir-199a-1-3p | -0.221143802 | 0.348769925 | -0.5709794   | 0.00855274  |
| mir-25-3p     | mir-199b-3p   | -0.221143802 | 0.348769925 | -0.5709794   | 0.00855274  |
| mir-182-5p    | mir-125b-1-5p | 0.207761873  | 0.37942285  | -0.210047088 | 0.374084078 |
| mir-182-5p    | mir-125b-2-5p | 0.207761873  | 0.37942285  | -0.210047088 | 0.374084078 |
| mir-29a-3p    | mir-744-5p    | -0.3169117   | 0.173382494 | 0.095348839  | 0.689252525 |
| mir-182-5p    | mir-10b-5p    | -0.187077281 | 0.429659205 | 0.23015703   | 0.328961442 |
| mir-584-5p    | mir-143-3p    | -0.100948685 | 0.671951002 | 0.311643051  | 0.181037326 |
| let-7i-5p     | mir-224-5p    | 0.097817909  | 0.681605064 | 0.479017461  | 0.032607969 |
| mir-146b-5p   | mir-194-2-5p  | -0.630071049 | 0.002905192 | -0.308053779 | 0.186381495 |
| mir-146b-5p   | mir-194-1-5p  | -0.630071049 | 0.002905192 | -0.308053779 | 0.186381495 |
| mir-148a-3p   | mir-20b-5p    | 0.167345964  | 0.480684035 | -0.2488276   | 0.290104482 |
| mir-10b-5p    | mir-20b-5p    | -0.060790683 | 0.79903665  | 0.346883069  | 0.134029333 |
| mir-16-2-5p   | mir-151a-3p   | 0.005341544  | 0.98216877  | -0.394496643 | 0.085204251 |
| mir-151a-3p   | mir-16-1-5p   | 0.005341544  | 0.98216877  | -0.394496643 | 0.085204251 |
| mir-182-5p    | mir-223-3p    | -0.270441347 | 0.248818262 | -0.60421845  | 0.004778861 |
| mir-451a      | mir-194-2-5p  | 0.851771126  | 1.89E-06    | 0.685890213  | 0.000841977 |
| mir-451a      | mir-194-1-5p  | 0.851771126  | 1.89E-06    | 0.685890213  | 0.000841977 |
| mir-92a-2-3p  | mir-30e-5p    | 0.41629828   | 0.067884861 | 0.020902287  | 0.930299559 |
| mir-30e-5p    | mir-92a-1-3p  | 0.41629828   | 0.067884861 | 0.020902287  | 0.930299559 |
| mir-140-5p    | mir-629-5p    | 0.411519402  | 0.071432842 | 0.015239488  | 0.949154913 |
| mir-181b-2-5p | mir-194-2-5p  | 0.581864893  | 0.007115437 | 0.238473364  | 0.311289497 |
| mir-181b-2-5p | mir-194-1-5p  | 0.581864893  | 0.007115437 | 0.238473364  | 0.311289497 |
| mir-181b-1-5p | mir-194-2-5p  | 0.581864893  | 0.007115437 | 0.238473364  | 0.311289497 |
| mir-181b-1-5p | mir-194-1-5p  | 0.581864893  | 0.007115437 | 0.238473364  | 0.311289497 |
| mir-22-3p     | let-7g-5p     | 0.472429446  | 0.03543204  | 0.733045468  | 0.000236163 |
| mir-221-3p    | mir-28-3p     | 0.652443064  | 0.001821046 | 0.834102222  | 4.87E-06    |
| mir-101-1-3p  | mir-151a-3p   | 0.093779157  | 0.694129493 | -0.316568281 | 0.173874602 |
| mir-151a-3p   | mir-101-2-3p  | 0.093779157  | 0.694129493 | -0.316568281 | 0.173874602 |
| mir-30e-5p    | norepi        | 0.316132193  | 0.174500874 | -0.094007491 | 0.69341934  |
| let-7i-5p     | mir-320a      | 0.578315538  | 0.007560512 | 0.234012593  | 0.320696014 |
| mir-192-5p    | mir-20a-5p    | 0.877311135  | 3.80E-07    | 0.736360759  | 0.000213888 |
| mir-98-5p     | mir-143-3p    | -0.076445823 | 0.748716674 | 0.331712629  | 0.153069498 |
| mir-23a-3p    | cpeptide      | -0.030435337 | 0.898643024 | -0.423336986 | 0.062902309 |
| mir-423-3p    | mir-199a-1-5p | 0.69787083   | 0.000623361 | 0.857579716  | 1.35E-06    |
| mir-423-3p    | mir-199a-2-5p | 0.69787083   | 0.000623361 | 0.857579716  | 1.35E-06    |
| mir-1307-3p   | mir-151a-5p   | 0.038854308  | 0.870806584 | 0.429784877  | 0.058584961 |
| mir-27b-3p    | mir-363-3p    | -0.248891459 | 0.289976648 | -0.588231794 | 0.006370863 |
| mir-10b-5p    | mir-122-5p    | 0.454508397  | 0.044083174 | 0.070149851  | 0.768848498 |
| mir-181a-2-5p | mir-374b-5p   | 0.71301017   | 0.000417569 | 0.865115444  | 8.51E-07    |
| mir-374b-5p   | mir-181a-1-5p | 0.71301017   | 0.000417569 | 0.865115444  | 8.51E-07    |
| mir-10b-5p    | mir-28-5p     | 0.373404968  | 0.104872309 | -0.027638961 | 0.907915811 |
| mir-26b-5p    | mir-20a-5p    | 0.949061552  | 1.82E-10    | 0.885836643  | 2.05E-07    |
| mir-340-5p    | mir-99b-5p    | 0.753105141  | 0.000126752 | 0.508343099  | 0.022102655 |
| mir-146a-5p   | mir-106b-3p   | -0.483146996 | 0.030929586 | -0.738239693 | 0.00020208  |
| mir-98-5p     | let-7b-5p     | -0.230061556 | 0.329167701 | -0.574176243 | 0.008108059 |
| mir-24-2-3p   | mir-15b-5p    | 0.10736793   | 0.652311874 | 0.483195713  | 0.030910199 |
| mir-24-1-3p   | mir-15b-5p    | 0.10736793   | 0.652311874 | 0.483195713  | 0.030910199 |

|               |               |              |             |              |             |
|---------------|---------------|--------------|-------------|--------------|-------------|
| mir-29a-3p    | mir-21-5p     | -0.026600324 | 0.911362918 | 0.373712605  | 0.104563701 |
| mir-126-3p    | mir-148b-3p   | 0.335991737  | 0.147519002 | 0.646169039  | 0.002083535 |
| mir-340-5p    | mir-20b-5p    | -0.157062264 | 0.508419946 | -0.520759058 | 0.01856111  |
| mir-10b-5p    | norepi        | -0.282267433 | 0.227907341 | 0.128050906  | 0.590569388 |
| mir-199a-1-5p | mir-30c-1-5p  | 0.830783706  | 5.74E-06    | 0.647963555  | 0.002005419 |
| mir-199a-1-5p | mir-30c-2-5p  | 0.830783706  | 5.74E-06    | 0.647963555  | 0.002005419 |
| mir-30c-1-5p  | mir-199a-2-5p | 0.830783706  | 5.74E-06    | 0.647963555  | 0.002005419 |
| mir-199a-2-5p | mir-30c-2-5p  | 0.830783706  | 5.74E-06    | 0.647963555  | 0.002005419 |
| mir-144-3p    | let-7a-3-5p   | -0.214668598 | 0.363417934 | -0.56265178  | 0.00980519  |
| mir-144-3p    | let-7a-2-5p   | -0.214668598 | 0.363417934 | -0.56265178  | 0.00980519  |
| mir-144-3p    | let-7a-1-5p   | -0.214668598 | 0.363417934 | -0.56265178  | 0.00980519  |
| mir-16-2-5p   | mir-30e-5p    | 0.862948113  | 9.75E-07    | 0.709543083  | 0.000458686 |
| mir-16-1-5p   | mir-30e-5p    | 0.862948113  | 9.75E-07    | 0.709543083  | 0.000458686 |
| mir-181b-2-5p | mir-107       | 0.515089262  | 0.020117402 | 0.150186504  | 0.527381744 |
| mir-181b-1-5p | mir-107       | 0.515089262  | 0.020117402 | 0.150186504  | 0.527381744 |
| mir-29a-3p    | mir-30d-5p    | -0.005828105 | 0.980544806 | 0.390316615  | 0.088866677 |
| mir-423-5p    | mir-148b-3p   | 0.508758053  | 0.021976223 | 0.142800778  | 0.548109719 |
| mir-10b-5p    | mir-148a-3p   | -0.000247143 | 0.999174919 | -0.394766636 | 0.084971584 |
| let-7b-5p     | mir-186-5p    | 0.90292981   | 5.09E-08    | 0.789870118  | 3.44E-05    |
| mir-146b-5p   | mir-374b-5p   | 0.427438647  | 0.0601291   | 0.703159026  | 0.000543433 |
| mir-25-3p     | mir-15b-5p    | 0.61993828   | 0.003548929 | 0.298935478  | 0.200433631 |
| mir-23a-3p    | mir-221-3p    | 0.814056831  | 1.26E-05    | 0.91468063   | 1.66E-08    |
| mir-21-5p     | mir-143-3p    | 0.052596875  | 0.825694767 | 0.437453327  | 0.053747236 |
| mir-21-5p     | mir-423-3p    | 0.68083937   | 0.000951869 | 0.847449905  | 2.41E-06    |
| mir-7-3-5p    | mir-30e-5p    | 0.812831164  | 1.33E-05    | 0.616637623  | 0.003782555 |
| mir-7-1-5p    | mir-30e-5p    | 0.812831164  | 1.33E-05    | 0.616637623  | 0.003782555 |
| mir-7-2-5p    | mir-30e-5p    | 0.812831164  | 1.33E-05    | 0.616637623  | 0.003782555 |
| mir-25-3p     | mir-629-5p    | 0.908329614  | 3.10E-08    | 0.801327244  | 2.17E-05    |
| mir-629-5p    | mir-150-5p    | -0.081553469 | 0.732498193 | 0.321871392  | 0.16638125  |
| mir-122-5p    | mir-186-5p    | -0.047474101 | 0.84245717  | -0.432352412 | 0.056929832 |
| mir-451a      | mir-27a-3p    | 0.683900949  | 0.000883903 | 0.397920606  | 0.082288296 |
| mir-25-3p     | mir-194-2-5p  | 0.847548938  | 2.40E-06    | 0.681770301  | 0.000930751 |
| mir-25-3p     | mir-194-1-5p  | 0.847548938  | 2.40E-06    | 0.681770301  | 0.000930751 |
| mir-146a-5p   | mir-451a      | -0.404332405 | 0.077027507 | -0.68780872  | 0.000803147 |
| mir-103a-2-3p | mir-125a-5p   | 0.352702679  | 0.127190171 | 0.654649779  | 0.001735577 |
| mir-125a-5p   | mir-103a-1-3p | 0.352702679  | 0.127190171 | 0.654649779  | 0.001735577 |
| mir-1307-3p   | mir-15a-5p    | -0.685779306 | 0.000844269 | -0.849612388 | 2.14E-06    |
| mir-30c-1-5p  | mir-15b-5p    | 0.156910714  | 0.508834334 | 0.517447069  | 0.019458061 |
| mir-30c-2-5p  | mir-15b-5p    | 0.156910714  | 0.508834334 | 0.517447069  | 0.019458061 |
| mir-106b-3p   | let-7g-5p     | 0.505081989  | 0.023116503 | 0.140554944  | 0.554484646 |
| mir-103a-2-3p | mir-532-5p    | -0.046877309 | 0.844414344 | -0.431325431 | 0.057587544 |
| mir-532-5p    | mir-103a-1-3p | -0.046877309 | 0.844414344 | -0.431325431 | 0.057587544 |
| mir-26b-5p    | mir-192-5p    | 0.842277693  | 3.19E-06    | 0.672058543  | 0.001171753 |
| mir-181a-2-5p | mir-10a-5p    | 0.108610968  | 0.648533747 | 0.480405563  | 0.032036041 |
| mir-10a-5p    | mir-181a-1-5p | 0.108610968  | 0.648533747 | 0.480405563  | 0.032036041 |
| mir-30c-1-5p  | mir-20a-5p    | -0.298123408 | 0.201718416 | 0.10646848   | 0.655050789 |
| mir-20a-5p    | mir-30c-2-5p  | -0.298123408 | 0.201718416 | 0.10646848   | 0.655050789 |
| mir-139-5p    | mir-27a-3p    | 0.042110943  | 0.860076208 | 0.427080444  | 0.060367531 |
| mir-378a-3p   | mir-106b-3p   | 0.766952224  | 7.97E-05    | 0.536565306  | 0.014724291 |
| mir-26b-5p    | mir-363-3p    | 0.897293824  | 8.28E-08    | 0.953726068  | 7.81E-11    |
| mir-26b-5p    | mir-15b-5p    | 0.684110247  | 0.00087941  | 0.400057214  | 0.080506536 |
| mir-10b-5p    | mir-223-3p    | 0.23968809   | 0.308757104 | -0.166739765 | 0.482297793 |
| mir-103a-2-3p | mir-148a-3p   | -0.009146841 | 0.969470354 | 0.382922834  | 0.095626553 |
| mir-103a-1-3p | mir-148a-3p   | -0.009146841 | 0.969470354 | 0.382922834  | 0.095626553 |
| mir-320a      | mir-15a-5p    | 0.781949686  | 4.65E-05    | 0.563382773  | 0.009689609 |
| mir-22-3p     | mir-21-5p     | -0.319690237 | 0.169435895 | 0.081015005  | 0.73420299  |
| mir-25-3p     | mir-150-5p    | 0.099341752  | 0.676900078 | 0.471532572  | 0.035830784 |
| mir-181b-2-5p | mir-7-3-5p    | 0.598886224  | 0.005268465 | 0.272079429  | 0.24585112  |
| mir-181b-2-5p | mir-7-1-5p    | 0.598886224  | 0.005268465 | 0.272079429  | 0.24585112  |
| mir-181b-2-5p | mir-7-2-5p    | 0.598886224  | 0.005268465 | 0.272079429  | 0.24585112  |
| mir-7-3-5p    | mir-181b-1-5p | 0.598886224  | 0.005268465 | 0.272079429  | 0.24585112  |
| mir-181b-1-5p | mir-7-1-5p    | 0.598886224  | 0.005268465 | 0.272079429  | 0.24585112  |
| mir-181b-1-5p | mir-7-2-5p    | 0.598886224  | 0.005268465 | 0.272079429  | 0.24585112  |
| mir-146a-5p   | let-7d-5p     | 0.843820778  | 2.94E-06    | 0.928375304  | 3.63E-09    |

|               |               |              |             |              |             |
|---------------|---------------|--------------|-------------|--------------|-------------|
| mir-181b-2-5p | let-7b-5p     | 0.519377662  | 0.018931116 | 0.16316744   | 0.491862025 |
| mir-181b-1-5p | let-7b-5p     | 0.519377662  | 0.018931116 | 0.16316744   | 0.491862025 |
| mir-223-3p    | mir-30c-1-5p  | 0.773617806  | 6.30E-05    | 0.89367384   | 1.12E-07    |
| mir-223-3p    | mir-30c-2-5p  | 0.773617806  | 6.30E-05    | 0.89367384   | 1.12E-07    |
| mir-629-5p    | cpeptide      | -0.08280001  | 0.728556238 | 0.316165337  | 0.174453222 |
| mir-19b-2-3p  | mir-106b-3p   | 0.857645293  | 1.34E-06    | 0.70346342   | 0.00053911  |
| mir-19b-1-3p  | mir-106b-3p   | 0.857645293  | 1.34E-06    | 0.70346342   | 0.00053911  |
| let-7f-2-5p   | mir-24-2-3p   | 0.626650522  | 0.003110622 | 0.816442043  | 1.13E-05    |
| let-7f-2-5p   | mir-24-1-3p   | 0.626650522  | 0.003110622 | 0.816442043  | 1.13E-05    |
| mir-24-2-3p   | let-7f-1-5p   | 0.626650522  | 0.003110622 | 0.816442043  | 1.13E-05    |
| let-7f-1-5p   | mir-24-1-3p   | 0.626650522  | 0.003110622 | 0.816442043  | 1.13E-05    |
| mir-103a-2-3p | mir-107       | 0.298061231  | 0.201817014 | -0.102219995 | 0.668044759 |
| mir-103a-1-3p | mir-107       | 0.298061231  | 0.201817014 | -0.102219995 | 0.668044759 |
| mir-128-1-3p  | mir-20b-5p    | 0.124594778  | 0.600714239 | -0.277147508 | 0.236815125 |
| mir-128-2-3p  | mir-20b-5p    | 0.124594778  | 0.600714239 | -0.277147508 | 0.236815125 |
| mir-126-3p    | mir-340-5p    | 0.734800733  | 0.000224135 | 0.873782087  | 4.84E-07    |
| mir-103a-2-3p | mir-148b-3p   | 0.465128331  | 0.03878053  | 0.722840838  | 0.000317597 |
| mir-103a-1-3p | mir-148b-3p   | 0.465128331  | 0.03878053  | 0.722840838  | 0.000317597 |
| mir-192-5p    | norepi        | -0.026774314 | 0.91078536  | -0.41061925  | 0.072116382 |
| mir-182-5p    | let-7b-5p     | 0.814373158  | 1.24E-05    | 0.913667097  | 1.84E-08    |
| mir-584-5p    | mir-93-5p     | -0.105449464 | 0.658158926 | -0.473906332 | 0.034782969 |
| mir-21-5p     | mir-486-2-5p  | -0.40406363  | 0.077242874 | -0.684542936 | 0.000870184 |
| mir-584-5p    | mir-24-2-3p   | 0.341269807  | 0.140868285 | 0.643782625  | 0.002191345 |
| mir-584-5p    | mir-24-1-3p   | 0.341269807  | 0.140868285 | 0.643782625  | 0.002191345 |
| mir-224-5p    | mir-30d-5p    | 0.271334009  | 0.247198514 | 0.596247516  | 0.005525612 |
| mir-26a-2-5p  | let-7i-5p     | 0.448394646  | 0.047379505 | 0.712057172  | 0.000428545 |
| let-7i-5p     | mir-26a-1-5p  | 0.448394646  | 0.047379505 | 0.712057172  | 0.000428545 |
| mir-146a-5p   | mir-486-2-5p  | -0.377310317 | 0.101003381 | -0.667135143 | 0.001312744 |
| mir-16-2-5p   | mir-107       | 0.967595092  | 3.33E-12    | 0.928111201  | 3.74E-09    |
| mir-107       | mir-16-1-5p   | 0.967595092  | 3.33E-12    | 0.928111201  | 3.74E-09    |
| mir-19b-2-3p  | mir-103a-2-3p | 0.337259946  | 0.145901346 | -0.057250499 | 0.810529984 |
| mir-19b-2-3p  | mir-103a-1-3p | 0.337259946  | 0.145901346 | -0.057250499 | 0.810529984 |
| mir-103a-2-3p | mir-19b-1-3p  | 0.337259946  | 0.145901346 | -0.057250499 | 0.810529984 |
| mir-19b-1-3p  | mir-103a-1-3p | 0.337259946  | 0.145901346 | -0.057250499 | 0.810529984 |
| mir-194-2-5p  | mir-629-5p    | 0.752122816  | 0.000130848 | 0.515020631  | 0.020136857 |
| mir-629-5p    | mir-194-1-5p  | 0.752122816  | 0.000130848 | 0.515020631  | 0.020136857 |
| mir-22-3p     | let-7b-5p     | 0.746411208  | 0.000156982 | 0.505523467  | 0.022977134 |
| mir-122-5p    | mir-320a      | 0.09429729   | 0.692518375 | -0.303517722 | 0.193286317 |
| mir-340-5p    | mir-143-3p    | -0.134725714 | 0.571183964 | 0.265667755  | 0.257594868 |
| mir-181b-2-5p | mir-375       | -0.423547735 | 0.062757508 | -0.044305761 | 0.852857622 |
| mir-181b-1-5p | mir-375       | -0.423547735 | 0.062757508 | -0.044305761 | 0.852857622 |
| mir-1307-3p   | mir-20b-5p    | -0.636330429 | 0.00255847  | -0.8209107   | 9.21E-06    |
| mir-181a-2-5p | mir-28-3p     | 0.439051003  | 0.052778847 | 0.705495603  | 0.000510993 |
| mir-28-3p     | mir-181a-1-5p | 0.439051003  | 0.052778847 | 0.705495603  | 0.000510993 |
| mir-101-1-3p  | mir-629-5p    | 0.894760964  | 1.02E-07    | 0.777258849  | 5.53E-05    |
| mir-629-5p    | mir-101-2-3p  | 0.894760964  | 1.02E-07    | 0.777258849  | 5.53E-05    |
| mir-24-2-3p   | mir-148a-3p   | -0.201721798 | 0.393738221 | 0.199440594  | 0.399221473 |
| mir-148a-3p   | mir-24-1-3p   | -0.201721798 | 0.393738221 | 0.199440594  | 0.399221473 |
| mir-15a-5p    | mir-28-5p     | -0.375019622 | 0.1032599   | -0.664460068 | 0.001395153 |
| mir-151a-3p   | mir-126-5p    | 0.513296716  | 0.020630479 | 0.750272117  | 0.000138873 |
| mir-150-5p    | mir-93-5p     | -0.043788588 | 0.85455757  | 0.347296682  | 0.133534861 |
| mir-144-3p    | mir-425-5p    | 0.738889728  | 0.000198127 | 0.494757497  | 0.02657135  |
| mir-16-2-5p   | mir-320a      | 0.93694697   | 1.19E-09    | 0.86349321   | 9.42E-07    |
| mir-320a      | mir-16-1-5p   | 0.93694697   | 1.19E-09    | 0.86349321   | 9.42E-07    |
| mir-128-1-3p  | mir-486-2-5p  | 0.112224677  | 0.637597268 | -0.284618166 | 0.223891558 |
| mir-486-2-5p  | mir-128-2-3p  | 0.112224677  | 0.637597268 | -0.284618166 | 0.223891558 |
| mir-30e-5p    | let-7g-5p     | 0.723383441  | 0.000312733 | 0.866769037  | 7.67E-07    |
| mir-182-5p    | mir-224-5p    | -0.107007698 | 0.653408305 | -0.471875419 | 0.035677947 |
| mir-181a-2-5p | mir-30d-5p    | 0.7587044    | 0.000105445 | 0.884948463  | 2.19E-07    |
| mir-30d-5p    | mir-181a-1-5p | 0.7587044    | 0.000105445 | 0.884948463  | 2.19E-07    |
| mir-7-3-5p    | mir-20a-5p    | 0.914986536  | 1.61E-08    | 0.818574405  | 1.03E-05    |
| mir-7-1-5p    | mir-20a-5p    | 0.914986536  | 1.61E-08    | 0.818574405  | 1.03E-05    |
| mir-20a-5p    | mir-7-2-5p    | 0.914986536  | 1.61E-08    | 0.818574405  | 1.03E-05    |
| mir-340-5p    | mir-1307-3p   | 0.249713635  | 0.288333892 | 0.577915343  | 0.007612092 |

|               |               |              |             |              |             |
|---------------|---------------|--------------|-------------|--------------|-------------|
| mir-224-5p    | mir-24-2-3p   | 0.626374671  | 0.003127702 | 0.814282718  | 1.24E-05    |
| mir-224-5p    | mir-24-1-3p   | 0.626374671  | 0.003127702 | 0.814282718  | 1.24E-05    |
| mir-10b-5p    | mir-143-3p    | 0.395017463  | 0.084755855 | 0.013563173  | 0.954741951 |
| let-7i-5p     | mir-28-5p     | 0.266671508  | 0.255733318 | 0.589797856  | 0.006197883 |
| mir-98-5p     | mir-484       | 0.403732321  | 0.077508964 | 0.024187738  | 0.919375775 |
| mir-223-3p    | mir-23a-3p    | 0.65894182   | 0.001578948 | 0.832066002  | 5.39E-06    |
| mir-126-3p    | mir-224-5p    | 0.532872212  | 0.015557815 | 0.760753607  | 9.85E-05    |
| mir-148a-3p   | mir-15b-5p    | -0.157385966 | 0.507535381 | 0.240335082  | 0.307413386 |
| mir-16-2-5p   | mir-101-1-3p  | 0.971916146  | 9.32E-13    | 0.938125912  | 1.01E-09    |
| mir-16-2-5p   | mir-101-2-3p  | 0.971916146  | 9.32E-13    | 0.938125912  | 1.01E-09    |
| mir-101-1-3p  | mir-16-1-5p   | 0.971916146  | 9.32E-13    | 0.938125912  | 1.01E-09    |
| mir-16-1-5p   | mir-101-2-3p  | 0.971916146  | 9.32E-13    | 0.938125912  | 1.01E-09    |
| let-7b-5p     | mir-20a-5p    | 0.901949503  | 5.55E-08    | 0.792823193  | 3.06E-05    |
| mir-182-5p    | mir-584-5p    | -0.373866226 | 0.104409842 | -0.66197306  | 0.001475626 |
| mir-126-5p    | mir-363-3p    | 0.205525443  | 0.384688852 | -0.19227527  | 0.416714924 |
| mir-374b-5p   | mir-486-2-5p  | -0.026797503 | 0.910708385 | -0.405251183 | 0.076294673 |
| mir-425-5p    | mir-423-5p    | 0.827482023  | 6.75E-06    | 0.650994214  | 0.001879057 |
| mir-148a-3p   | mir-99b-5p    | -0.338382075 | 0.144480399 | 0.05068657   | 0.831937448 |
| mir-222-3p    | mir-126-5p    | 0.473170792  | 0.03510506  | 0.110787594  | 0.641937963 |
| mir-486-2-5p  | let-7g-5p     | 0.609014298  | 0.004371184 | 0.29538366   | 0.206093426 |
| mir-103a-2-3p | mir-30c-1-5p  | 0.591403668  | 0.006024536 | 0.794156863  | 2.90E-05    |
| mir-103a-2-3p | mir-30c-2-5p  | 0.591403668  | 0.006024536 | 0.794156863  | 2.90E-05    |
| mir-103a-1-3p | mir-30c-1-5p  | 0.591403668  | 0.006024536 | 0.794156863  | 2.90E-05    |
| mir-103a-1-3p | mir-30c-2-5p  | 0.591403668  | 0.006024536 | 0.794156863  | 2.90E-05    |
| mir-182-5p    | mir-199a-1-5p | -0.42297604  | 0.063150894 | -0.692997007 | 0.000705638 |
| mir-182-5p    | mir-199a-2-5p | -0.42297604  | 0.063150894 | -0.692997007 | 0.000705638 |
| mir-144-3p    | mir-484       | 0.794166392  | 2.90E-05    | 0.592006018  | 0.005960549 |
| mir-181b-2-5p | let-7g-5p     | 0.020294687  | 0.932321137 | 0.398612961  | 0.08170776  |
| mir-181b-1-5p | let-7g-5p     | 0.020294687  | 0.932321137 | 0.398612961  | 0.08170776  |
| mir-107       | norepi        | 0.138329292  | 0.560834777 | -0.256555902 | 0.274885601 |
| mir-106b-3p   | mir-374b-5p   | -0.157526781 | 0.507150815 | -0.508294666 | 0.02211745  |
| mir-19b-2-3p  | mir-28-3p     | -0.165104236 | 0.486665111 | -0.513910958 | 0.020453507 |
| mir-19b-1-3p  | mir-28-3p     | -0.165104236 | 0.486665111 | -0.513910958 | 0.020453507 |
| mir-199a-1-5p | mir-15b-5p    | -0.135532408 | 0.568860006 | 0.258600976  | 0.270943371 |
| mir-199a-2-5p | mir-15b-5p    | -0.135532408 | 0.568860006 | 0.258600976  | 0.270943371 |
| mir-192-5p    | mir-363-3p    | 0.836938675  | 4.21E-06    | 0.669746913  | 0.001236273 |
| let-7a-3-5p   | mir-143-3p    | -0.126961653 | 0.593758915 | 0.266184371  | 0.256635687 |
| let-7a-2-5p   | mir-143-3p    | -0.126961653 | 0.593758915 | 0.266184371  | 0.256635687 |
| mir-143-3p    | let-7a-1-5p   | -0.126961653 | 0.593758915 | 0.266184371  | 0.256635687 |
| mir-30d-5p    | mir-106b-3p   | -0.020639581 | 0.931173572 | -0.397789691 | 0.08239841  |
| mir-486-2-5p  | mir-99a-5p    | 0.310648953  | 0.182506938 | -0.078763718 | 0.741343539 |
| mir-26b-5p    | mir-199a-2-3p | -0.212958709 | 0.367343798 | -0.548621172 | 0.01224991  |
| mir-26b-5p    | mir-199a-1-3p | -0.212958709 | 0.367343798 | -0.548621172 | 0.01224991  |
| mir-26b-5p    | mir-199b-3p   | -0.212958709 | 0.367343798 | -0.548621172 | 0.01224991  |
| mir-21-5p     | mir-27a-3p    | -0.034605152 | 0.884839721 | 0.349611848  | 0.130790885 |
| mir-191-5p    | mir-126-5p    | 0.588951836  | 0.006290845 | 0.791461392  | 3.23E-05    |
| mir-143-3p    | mir-28-5p     | -0.167447667 | 0.480413556 | 0.22597707   | 0.338063334 |
| mir-744-5p    | mir-363-3p    | -0.525604772 | 0.0173086   | -0.75435621  | 0.000121696 |
| mir-144-3p    | mir-194-2-5p  | 0.816219308  | 1.14E-05    | 0.633090994  | 0.002733327 |
| mir-144-3p    | mir-194-1-5p  | 0.816219308  | 1.14E-05    | 0.633090994  | 0.002733327 |
| mir-181b-2-5p | mir-25-3p     | 0.539607963  | 0.014064891 | 0.202315072  | 0.392319051 |
| mir-25-3p     | mir-181b-1-5p | 0.539607963  | 0.014064891 | 0.202315072  | 0.392319051 |
| mir-106b-3p   | mir-99a-5p    | 0.254837434  | 0.278225755 | -0.13647915  | 0.566137869 |
| mir-28-5p     | mir-28-3p     | 0.507514916  | 0.02235672  | 0.74288963   | 0.000175228 |
| mir-340-5p    | mir-125a-5p   | 0.784977244  | 4.15E-05    | 0.578834368  | 0.007494068 |
| mir-29a-3p    | mir-629-5p    | 0.367516027  | 0.110907835 | -0.011873763 | 0.960374692 |
| mir-148b-3p   | mir-20a-5p    | 0.549551836  | 0.012073836 | 0.216828224  | 0.358493927 |
| mir-98-5p     | mir-451a      | -0.193005747 | 0.414912879 | -0.531914452 | 0.01578005  |
| mir-320a      | norepi        | 0.201550267  | 0.39414907  | -0.19042118  | 0.421307751 |
| mir-148a-3p   | mir-107       | 0.214159645  | 0.364583963 | -0.177629843 | 0.453722273 |
| mir-146b-5p   | mir-15a-5p    | -0.750649705 | 0.000137202 | -0.879033973 | 3.37E-07    |
| mir-543       | mir-10a-5p    | 0.588446989  | 0.006346861 | 0.271402379  | 0.247074735 |
| mir-140-5p    | mir-15b-5p    | 0.658806678  | 0.001583692 | 0.829810904  | 6.03E-06    |
| mir-194-2-5p  | let-7b-5p     | 0.812169271  | 1.37E-05    | 0.627069847  | 0.003084807 |

|               |               |              |             |              |             |
|---------------|---------------|--------------|-------------|--------------|-------------|
| let-7b-5p     | mir-194-1-5p  | 0.812169271  | 1.37E-05    | 0.627069847  | 0.003084807 |
| mir-146b-5p   | mir-126-5p    | 0.280596364  | 0.230790376 | 0.594807967  | 0.005670198 |
| mir-584-5p    | mir-363-3p    | -0.408639052 | 0.073637269 | -0.680824425 | 0.000952211 |
| mir-146a-5p   | mir-93-5p     | -0.173140038 | 0.465396357 | -0.516386771 | 0.019752399 |
| mir-143-3p    | mir-122-5p    | 0.325166312  | 0.161838892 | -0.05899921  | 0.804847914 |
| mir-340-5p    | mir-543       | 0.694126326  | 0.000685799 | 0.429678998  | 0.058653989 |
| mir-92a-2-3p  | mir-30d-5p    | -0.421677477 | 0.064051355 | -0.688932098 | 0.000781121 |
| mir-30d-5p    | mir-92a-1-3p  | -0.421677477 | 0.064051355 | -0.688932098 | 0.000781121 |
| mir-26a-2-5p  | mir-20b-5p    | -0.286515618 | 0.220684044 | -0.598573822 | 0.005298384 |
| mir-26a-1-5p  | mir-20b-5p    | -0.286515618 | 0.220684044 | -0.598573822 | 0.005298384 |
| mir-194-2-5p  | mir-486-2-5p  | 0.827145944  | 6.86E-06    | 0.654461165  | 0.001742749 |
| mir-194-1-5p  | mir-486-2-5p  | 0.827145944  | 6.86E-06    | 0.654461165  | 0.001742749 |
| mir-191-5p    | mir-106b-3p   | -0.256465402 | 0.275060876 | -0.576863437 | 0.007749042 |
| mir-16-2-5p   | mir-126-5p    | 0.326371179  | 0.160199436 | -0.05625782  | 0.813759573 |
| mir-16-1-5p   | mir-126-5p    | 0.326371179  | 0.160199436 | -0.05625782  | 0.813759573 |
| mir-143-3p    | mir-23a-3p    | -0.009146819 | 0.969470425 | 0.367722071  | 0.110692527 |
| mir-103a-2-3p | mir-199a-1-5p | 0.310085033  | 0.183344184 | 0.614003876  | 0.003977992 |
| mir-103a-2-3p | mir-199a-2-5p | 0.310085033  | 0.183344184 | 0.614003876  | 0.003977992 |
| mir-199a-1-5p | mir-103a-1-3p | 0.310085033  | 0.183344184 | 0.614003876  | 0.003977992 |
| mir-103a-1-3p | mir-199a-2-5p | 0.310085033  | 0.183344184 | 0.614003876  | 0.003977992 |
| mir-28-3p     | mir-185-5p    | -0.085715148 | 0.719363375 | -0.446689332 | 0.048331858 |
| mir-744-5p    | mir-221-3p    | 0.836144795  | 4.39E-06    | 0.922088384  | 7.55E-09    |
| mir-106a-5p   | mir-20a-5p    | 0.903516257  | 4.83E-08    | 0.799257787  | 2.36E-05    |
| mir-122-5p    | mir-15b-5p    | -0.367633863 | 0.110784664 | 0.00852362   | 0.971549659 |
| mir-148b-3p   | mir-128-1-3p  | 0.500796788  | 0.024504383 | 0.737289984  | 0.000207976 |
| mir-148b-3p   | mir-128-2-3p  | 0.500796788  | 0.024504383 | 0.737289984  | 0.000207976 |
| mir-221-3p    | norepi        | 0.171791044  | 0.468933451 | 0.513261042  | 0.020640795 |
| mir-10b-5p    | mir-374b-5p   | 0.10404512   | 0.662451216 | -0.281350269 | 0.229486775 |
| mir-15a-5p    | mir-139-5p    | -0.416467981 | 0.067761352 | -0.684204934 | 0.000877384 |
| mir-126-3p    | mir-92a-2-3p  | -0.777683801 | 5.44E-05    | -0.892234183 | 1.25E-07    |
| mir-126-3p    | mir-92a-1-3p  | -0.777683801 | 5.44E-05    | -0.892234183 | 1.25E-07    |
| mir-122-5p    | mir-150-5p    | 0.691713288  | 0.000728777 | 0.428410462  | 0.059485819 |
| mir-122-5p    | mir-20b-5p    | 0.047602781  | 0.842035281 | -0.33246121  | 0.152088186 |
| mir-25-3p     | mir-99a-5p    | 0.324615999  | 0.162591537 | -0.056334697 | 0.813509357 |
| let-7d-5p     | mir-486-2-5p  | -0.301130857 | 0.19698765  | -0.606675432 | 0.004566253 |
| mir-24-2-3p   | mir-28-5p     | 0.756942632  | 0.000111789 | 0.88129876   | 2.87E-07    |
| mir-28-5p     | mir-24-1-3p   | 0.756942632  | 0.000111789 | 0.88129876   | 2.87E-07    |
| mir-629-5p    | mir-20b-5p    | 0.917882234  | 1.19E-08    | 0.828403985  | 6.45E-06    |
| mir-361-5p    | mir-223-3p    | 0.643854701  | 0.002188022 | 0.820033654  | 9.59E-06    |
| mir-3615      | mir-23a-3p    | -0.339422989 | 0.143170981 | -0.632488774 | 0.002766906 |
| mir-744-5p    | mir-375       | -0.158466013 | 0.504589343 | 0.228175627  | 0.333257703 |
| mir-125a-5p   | mir-30a-5p    | -0.010781934 | 0.964015987 | 0.363812502  | 0.114829523 |
| mir-222-3p    | mir-151a-3p   | 0.165652158  | 0.485199835 | -0.220937038 | 0.349232285 |
| mir-340-5p    | mir-486-2-5p  | -0.242742562 | 0.302444497 | -0.564505464 | 0.009514254 |
| mir-103a-2-3p | mir-423-3p    | 0.516430886  | 0.019740082 | 0.745580754  | 0.000161131 |
| mir-423-3p    | mir-103a-1-3p | 0.516430886  | 0.019740082 | 0.745580754  | 0.000161131 |
| mir-101-1-3p  | mir-28-3p     | -0.211106112 | 0.371624439 | -0.541139673 | 0.013742059 |
| mir-101-2-3p  | mir-28-3p     | -0.211106112 | 0.371624439 | -0.541139673 | 0.013742059 |
| mir-423-5p    | mir-15a-5p    | 0.514612465  | 0.020252872 | 0.175811653  | 0.458431516 |
| mir-98-5p     | mir-148a-3p   | -0.268068288 | 0.253157111 | 0.115934905  | 0.626443231 |
| mir-361-5p    | let-7i-5p     | 0.078072022  | 0.743541558 | 0.437742932  | 0.053570702 |
| mir-144-3p    | mir-28-5p     | -0.048538255 | 0.8389695   | -0.413384201 | 0.070032227 |
| mir-17-5p     | mir-15a-5p    | 0.641173655  | 0.002314504 | 0.353519937  | 0.126249989 |
| mir-425-5p    | mir-363-3p    | 0.697207174  | 0.000634061 | 0.439288616  | 0.052635969 |
| mir-374b-5p   | mir-150-5p    | 0.129510433  | 0.586306974 | -0.254232437 | 0.279407656 |
| mir-17-5p     | mir-93-5p     | 0.928041555  | 3.78E-09    | 0.849424935  | 2.16E-06    |
| mir-182-5p    | mir-29a-3p    | 0.338693692  | 0.144087524 | -0.037010428 | 0.876891807 |
| mir-584-5p    | mir-486-2-5p  | -0.293374991 | 0.209340703 | -0.59911296  | 0.005246837 |
| mir-199a-2-3p | mir-93-5p     | -0.128067789 | 0.590520009 | -0.476340628 | 0.033733397 |
| mir-199a-1-3p | mir-93-5p     | -0.128067789 | 0.590520009 | -0.476340628 | 0.033733397 |
| mir-199b-3p   | mir-93-5p     | -0.128067789 | 0.590520009 | -0.476340628 | 0.033733397 |
| mir-7-3-5p    | mir-484       | 0.765808157  | 8.29E-05    | 0.551615698  | 0.011690668 |
| mir-7-1-5p    | mir-484       | 0.765808157  | 8.29E-05    | 0.551615698  | 0.011690668 |
| mir-7-2-5p    | mir-484       | 0.765808157  | 8.29E-05    | 0.551615698  | 0.011690668 |

|               |               |              |             |              |             |
|---------------|---------------|--------------|-------------|--------------|-------------|
| mir-26b-5p    | mir-584-5p    | -0.194847169 | 0.410388922 | -0.527525623 | 0.016831233 |
| mir-106a-5p   | mir-224-5p    | 0.086383575  | 0.71726066  | -0.293693404 | 0.208823702 |
| mir-22-3p     | mir-451a      | 0.727129711  | 0.000280853 | 0.488135917  | 0.028993052 |
| mir-16-2-5p   | mir-181b-2-5p | 0.55992297   | 0.0102466   | 0.239091936  | 0.309998372 |
| mir-16-2-5p   | mir-181b-1-5p | 0.55992297   | 0.0102466   | 0.239091936  | 0.309998372 |
| mir-181b-2-5p | mir-16-1-5p   | 0.55992297   | 0.0102466   | 0.239091936  | 0.309998372 |
| mir-181b-1-5p | mir-16-1-5p   | 0.55992297   | 0.0102466   | 0.239091936  | 0.309998372 |
| mir-106a-5p   | mir-125b-1-5p | 0.325858408  | 0.160895753 | -0.050572242 | 0.832311372 |
| mir-106a-5p   | mir-125b-2-5p | 0.325858408  | 0.160895753 | -0.050572242 | 0.832311372 |
| mir-199a-2-3p | norepi        | 0.270131857  | 0.249381415 | 0.581833422  | 0.007119287 |
| mir-199a-1-3p | norepi        | 0.270131857  | 0.249381415 | 0.581833422  | 0.007119287 |
| mir-199b-3p   | norepi        | 0.270131857  | 0.249381415 | 0.581833422  | 0.007119287 |
| mir-21-5p     | mir-374b-5p   | 0.653026967  | 0.001798095 | 0.823794227  | 8.05E-06    |
| mir-107       | mir-28-3p     | -0.253593214 | 0.280659804 | -0.569505422 | 0.008764364 |
| mir-26a-2-5p  | mir-28-5p     | 0.716288223  | 0.00038162  | 0.858473921  | 1.28E-06    |
| mir-28-5p     | mir-26a-1-5p  | 0.716288223  | 0.00038162  | 0.858473921  | 1.28E-06    |
| mir-30d-5p    | mir-15a-5p    | -0.23987292  | 0.308372875 | -0.559474969 | 0.010320586 |
| let-7i-5p     | mir-30d-5p    | 0.803254741  | 2.00E-05    | 0.904258557  | 4.52E-08    |
| mir-26b-5p    | mir-148a-3p   | 0.272691791  | 0.244747762 | -0.107105556 | 0.653110387 |
| let-7i-5p     | mir-223-3p    | 0.283813303  | 0.225261274 | 0.590635528  | 0.006106953 |
| mir-7-3-5p    | mir-1307-3p   | -0.541809881 | 0.013602694 | -0.75883404  | 0.00010499  |
| mir-1307-3p   | mir-7-1-5p    | -0.541809881 | 0.013602694 | -0.75883404  | 0.00010499  |
| mir-1307-3p   | mir-7-2-5p    | -0.541809881 | 0.013602694 | -0.75883404  | 0.00010499  |
| mir-29a-3p    | mir-451a      | 0.499341963  | 0.024990264 | 0.160350844  | 0.499467915 |
| mir-7-3-5p    | mir-126-5p    | 0.212578736  | 0.368219473 | -0.169121544 | 0.475972793 |
| mir-7-1-5p    | mir-126-5p    | 0.212578736  | 0.368219473 | -0.169121544 | 0.475972793 |
| mir-7-2-5p    | mir-126-5p    | 0.212578736  | 0.368219473 | -0.169121544 | 0.475972793 |
| mir-27b-3p    | cpeptide      | 0.078533107  | 0.742076142 | -0.29776363  | 0.202289377 |
| mir-98-5p     | mir-221-3p    | 0.700322572  | 0.000585147 | 0.849299046  | 2.17E-06    |
| mir-101-1-3p  | mir-199a-2-3p | -0.206152715 | 0.383207745 | -0.533192764 | 0.015483999 |
| mir-101-1-3p  | mir-199a-1-3p | -0.206152715 | 0.383207745 | -0.533192764 | 0.015483999 |
| mir-101-1-3p  | mir-199b-3p   | -0.206152715 | 0.383207745 | -0.533192764 | 0.015483999 |
| mir-199a-2-3p | mir-101-2-3p  | -0.206152715 | 0.383207745 | -0.533192764 | 0.015483999 |
| mir-199a-1-3p | mir-101-2-3p  | -0.206152715 | 0.383207745 | -0.533192764 | 0.015483999 |
| mir-101-2-3p  | mir-199b-3p   | -0.206152715 | 0.383207745 | -0.533192764 | 0.015483999 |
| mir-26b-5p    | mir-484       | 0.821590626  | 8.92E-06    | 0.650645587  | 0.001893245 |
| mir-29a-3p    | mir-146b-5p   | -0.168428704 | 0.477808384 | 0.211956218  | 0.369656674 |
| mir-26a-2-5p  | mir-99b-5p    | 0.766163228  | 8.19E-05    | 0.555227349  | 0.011043856 |
| mir-99b-5p    | mir-26a-1-5p  | 0.766163228  | 8.19E-05    | 0.555227349  | 0.011043856 |
| mir-378a-3p   | mir-28-3p     | -0.085811144 | 0.719061273 | -0.439041954 | 0.052784294 |
| mir-106a-5p   | mir-744-5p    | -0.556008868 | 0.010907786 | -0.7665804   | 8.07E-05    |
| mir-3615      | let-7d-5p     | -0.500813054 | 0.024498993 | -0.732859253 | 0.000237471 |
| mir-1307-3p   | mir-24-2-3p   | 0.49395892   | 0.02685465  | 0.728522365  | 0.000269731 |
| mir-1307-3p   | mir-24-1-3p   | 0.49395892   | 0.02685465  | 0.728522365  | 0.000269731 |
| mir-15a-5p    | mir-99b-5p    | -0.84355361  | 2.98E-06    | -0.690689036 | 0.000747698 |
| mir-103a-2-3p | mir-128-1-3p  | 0.801308494  | 2.17E-05    | 0.902610217  | 5.23E-08    |
| mir-103a-2-3p | mir-128-2-3p  | 0.801308494  | 2.17E-05    | 0.902610217  | 5.23E-08    |
| mir-103a-1-3p | mir-128-1-3p  | 0.801308494  | 2.17E-05    | 0.902610217  | 5.23E-08    |
| mir-103a-1-3p | mir-128-2-3p  | 0.801308494  | 2.17E-05    | 0.902610217  | 5.23E-08    |
| mir-423-3p    | mir-151a-5p   | 0.523836378  | 0.0177576   | 0.746648205  | 0.000155815 |
| mir-22-3p     | mir-146b-5p   | -0.518694253 | 0.01911633  | -0.188652918 | 0.425713125 |
| mir-199a-2-3p | mir-139-5p    | 0.711394138  | 0.000436326 | 0.854757387  | 1.59E-06    |
| mir-139-5p    | mir-199a-1-3p | 0.711394138  | 0.000436326 | 0.854757387  | 1.59E-06    |
| mir-139-5p    | mir-199b-3p   | 0.711394138  | 0.000436326 | 0.854757387  | 1.59E-06    |
| mir-181a-2-5p | mir-144-3p    | 0.171133568  | 0.47066228  | -0.207457066 | 0.380138167 |
| mir-144-3p    | mir-181a-1-5p | 0.171133568  | 0.47066228  | -0.207457066 | 0.380138167 |
| mir-181a-2-5p | mir-486-2-5p  | 0.072568381  | 0.76109745  | -0.301009672 | 0.197176829 |
| mir-486-2-5p  | mir-181a-1-5p | 0.072568381  | 0.76109745  | -0.301009672 | 0.197176829 |
| mir-340-5p    | mir-27a-3p    | -0.06460789  | 0.786688442 | 0.308112844  | 0.186292698 |
| mir-629-5p    | mir-24-2-3p   | -0.469500489 | 0.036747157 | -0.71259334  | 0.00042234  |
| mir-629-5p    | mir-24-1-3p   | -0.469500489 | 0.036747157 | -0.71259334  | 0.00042234  |
| mir-143-3p    | mir-139-5p    | -0.349227848 | 0.131243222 | 0.01806804   | 0.939732857 |
| mir-199a-1-5p | mir-23a-3p    | 0.407325501  | 0.074659269 | 0.672335418  | 0.001164218 |
| mir-23a-3p    | mir-199a-2-5p | 0.407325501  | 0.074659269 | 0.672335418  | 0.001164218 |

|               |               |              |             |              |             |
|---------------|---------------|--------------|-------------|--------------|-------------|
| mir-378a-3p   | mir-150-5p    | 0.307923618  | 0.186577274 | 0.604875127  | 0.004721253 |
| mir-15a-5p    | mir-107       | 0.873375231  | 4.98E-07    | 0.746322146  | 0.000157423 |
| let-7i-5p     | mir-10a-5p    | 0.056815273  | 0.811945591 | 0.413076459  | 0.070261937 |
| mir-126-3p    | mir-106b-3p   | -0.318640567 | 0.170919531 | -0.612263713 | 0.00411165  |
| mir-22-3p     | mir-423-3p    | -0.302998322 | 0.194087754 | 0.069453622  | 0.77108377  |
| mir-30d-5p    | cpeptide      | -0.514676416 | 0.020234659 | -0.184721065 | 0.435596238 |
| mir-15a-5p    | mir-221-3p    | -0.722172579 | 0.000323676 | -0.86024393  | 1.15E-06    |
| mir-30e-5p    | cpeptide      | -0.337456907 | 0.14565123  | 0.03081638   | 0.89738044  |
| mir-29a-3p    | mir-30a-5p    | 0.277445181  | 0.23629116  | 0.582827691  | 0.00699848  |
| mir-125a-5p   | mir-151a-5p   | 0.553574461  | 0.011336174 | 0.237123459  | 0.31411834  |
| mir-22-3p     | mir-340-5p    | -0.151505594 | 0.523718628 | 0.225125169  | 0.339936301 |
| mir-27b-3p    | mir-101-1-3p  | -0.153920252 | 0.517044171 | -0.490510758 | 0.028105345 |
| mir-27b-3p    | mir-101-2-3p  | -0.153920252 | 0.517044171 | -0.490510758 | 0.028105345 |
| mir-19b-2-3p  | mir-148b-3p   | 0.512927582  | 0.020737417 | 0.18348154   | 0.438736771 |
| mir-19b-1-3p  | mir-148b-3p   | 0.512927582  | 0.020737417 | 0.18348154   | 0.438736771 |
| mir-194-2-5p  | mir-106b-3p   | 0.77799975   | 5.38E-05    | 0.577856242  | 0.007619734 |
| mir-194-1-5p  | mir-106b-3p   | 0.77799975   | 5.38E-05    | 0.577856242  | 0.007619734 |
| let-7f-2-5p   | mir-151a-3p   | 0.731016455  | 0.000250751 | 0.864768198  | 8.70E-07    |
| mir-151a-3p   | let-7f-1-5p   | 0.731016455  | 0.000250751 | 0.864768198  | 8.70E-07    |
| mir-146a-5p   | mir-7-3-5p    | -0.341497006 | 0.140586811 | -0.627221351 | 0.003075524 |
| mir-146a-5p   | mir-7-1-5p    | -0.341497006 | 0.140586811 | -0.627221351 | 0.003075524 |
| mir-146a-5p   | mir-7-2-5p    | -0.341497006 | 0.140586811 | -0.627221351 | 0.003075524 |
| mir-199a-2-3p | mir-10a-5p    | 0.226487213  | 0.336944652 | 0.545172324  | 0.012920588 |
| mir-199a-1-3p | mir-10a-5p    | 0.226487213  | 0.336944652 | 0.545172324  | 0.012920588 |
| mir-199b-3p   | mir-10a-5p    | 0.226487213  | 0.336944652 | 0.545172324  | 0.012920588 |
| mir-484       | mir-93-5p     | 0.85746428   | 1.36E-06    | 0.717615182  | 0.000367836 |
| mir-139-5p    | mir-28-5p     | 0.671708937  | 0.001181325 | 0.832033548  | 5.40E-06    |
| mir-629-5p    | let-7g-5p     | 0.410671497  | 0.072076575 | 0.055575262  | 0.815981893 |
| mir-26a-2-5p  | mir-543       | 0.722300293  | 0.000322506 | 0.486674826  | 0.029550051 |
| mir-543       | mir-26a-1-5p  | 0.722300293  | 0.000322506 | 0.486674826  | 0.029550051 |
| mir-16-2-5p   | mir-150-5p    | 0.0875115    | 0.71371692  | 0.436840906  | 0.054122008 |
| mir-16-1-5p   | mir-150-5p    | 0.0875115    | 0.71371692  | 0.436840906  | 0.054122008 |
| mir-21-5p     | mir-106b-3p   | -0.438327537 | 0.053215693 | -0.691348185 | 0.000735475 |
| mir-26b-5p    | mir-150-5p    | -0.043980458 | 0.853926822 | 0.324085359  | 0.163319555 |
| mir-144-3p    | mir-125b-1-5p | 0.310762661  | 0.182338431 | -0.058742301 | 0.805682103 |
| mir-144-3p    | mir-125b-2-5p | 0.310762661  | 0.182338431 | -0.058742301 | 0.805682103 |
| mir-21-5p     | mir-151a-5p   | 0.449013549  | 0.047037457 | 0.69806502   | 0.000620259 |
| mir-191-5p    | mir-363-3p    | -0.190632367 | 0.420783248 | -0.517553617 | 0.019428677 |
| mir-26b-5p    | mir-126-5p    | 0.367466459  | 0.110959676 | 0.005785771  | 0.980686097 |
| mir-122-5p    | mir-20a-5p    | 0.084484608  | 0.723239431 | -0.286585356 | 0.220566732 |
| let-7b-5p     | cpeptide      | -0.192535914 | 0.416071447 | 0.182470835  | 0.441306324 |
| mir-423-5p    | mir-10a-5p    | -0.130170518 | 0.584383549 | 0.243588646  | 0.300709895 |
| mir-15a-5p    | mir-363-3p    | 0.805525835  | 1.82E-05    | 0.903987262  | 4.63E-08    |
| mir-146a-5p   | mir-25-3p     | -0.318554626 | 0.171041394 | -0.610331862 | 0.004264363 |
| let-7i-5p     | mir-93-5p     | 0.460700063  | 0.040927876 | 0.118259749  | 0.619493454 |
| let-7i-5p     | mir-148a-3p   | -0.099583822 | 0.676153724 | 0.271902731  | 0.246170086 |
| mir-19b-2-3p  | mir-199a-2-3p | -0.107533447 | 0.651808323 | -0.45163274  | 0.045610868 |
| mir-19b-2-3p  | mir-199a-1-3p | -0.107533447 | 0.651808323 | -0.45163274  | 0.045610868 |
| mir-19b-2-3p  | mir-199b-3p   | -0.107533447 | 0.651808323 | -0.45163274  | 0.045610868 |
| mir-199a-2-3p | mir-19b-1-3p  | -0.107533447 | 0.651808323 | -0.45163274  | 0.045610868 |
| mir-19b-1-3p  | mir-199a-1-3p | -0.107533447 | 0.651808323 | -0.45163274  | 0.045610868 |
| mir-19b-1-3p  | mir-199b-3p   | -0.107533447 | 0.651808323 | -0.45163274  | 0.045610868 |
| mir-340-5p    | mir-128-1-3p  | 0.782854994  | 4.49E-05    | 0.891958611  | 1.28E-07    |
| mir-340-5p    | mir-128-2-3p  | 0.782854994  | 4.49E-05    | 0.891958611  | 1.28E-07    |
| mir-16-2-5p   | mir-99a-5p    | 0.283629029  | 0.225575639 | -0.086790785 | 0.715980634 |
| mir-16-1-5p   | mir-99a-5p    | 0.283629029  | 0.225575639 | -0.086790785 | 0.715980634 |
| mir-25-3p     | mir-128-1-3p  | 0.151765776  | 0.522997512 | -0.221757483 | 0.347399715 |
| mir-25-3p     | mir-128-2-3p  | 0.151765776  | 0.522997512 | -0.221757483 | 0.347399715 |
| mir-122-5p    | mir-629-5p    | -0.098876054 | 0.678336745 | -0.44428198  | 0.049701178 |
| mir-361-5p    | mir-139-5p    | 0.611284277  | 0.004188499 | 0.796612626  | 2.63E-05    |
| mir-148b-3p   | mir-28-3p     | 0.104835665  | 0.660033708 | 0.449014875  | 0.047036727 |
| mir-181b-2-5p | mir-30d-5p    | 0.024837699  | 0.91721631  | 0.382352372  | 0.096163292 |
| mir-181b-1-5p | mir-30d-5p    | 0.024837699  | 0.91721631  | 0.382352372  | 0.096163292 |
| mir-146b-5p   | mir-148b-3p   | 0.123965804  | 0.602568187 | 0.464088244  | 0.039276852 |



|               |               |              |             |              |             |
|---------------|---------------|--------------|-------------|--------------|-------------|
| mir-106b-3p   | mir-363-3p    | 0.93697377   | 1.18E-09    | 0.870480117  | 6.03E-07    |
| mir-144-3p    | mir-15b-5p    | 0.602731081  | 0.004911489 | 0.309708088  | 0.183905278 |
| mir-222-3p    | mir-106a-5p   | 0.738813726  | 0.000198585 | 0.868033589  | 7.07E-07    |
| mir-26a-2-5p  | mir-486-2-5p  | -0.361730131 | 0.11707782  | -0.638722806 | 0.00243541  |
| mir-486-2-5p  | mir-26a-1-5p  | -0.361730131 | 0.11707782  | -0.638722806 | 0.00243541  |
| mir-199a-2-3p | let-7d-3p     | 0.94932631   | 1.74E-10    | 0.89526706   | 9.79E-08    |
| mir-199a-1-3p | let-7d-3p     | 0.94932631   | 1.74E-10    | 0.89526706   | 9.79E-08    |
| mir-199b-3p   | let-7d-3p     | 0.94932631   | 1.74E-10    | 0.89526706   | 9.79E-08    |
| mir-361-5p    | mir-92a-2-3p  | -0.730533611 | 0.000254334 | -0.86347248  | 9.44E-07    |
| mir-361-5p    | mir-92a-1-3p  | -0.730533611 | 0.000254334 | -0.86347248  | 9.44E-07    |
| mir-23a-3p    | mir-20b-5p    | -0.240045256 | 0.308014878 | -0.552290316 | 0.011567578 |
| mir-378a-3p   | mir-99b-5p    | -0.410692235 | 0.072060779 | -0.059837356 | 0.80212785  |
| mir-126-3p    | mir-106a-5p   | -0.250604448 | 0.286560481 | -0.559790459 | 0.010268439 |
| mir-98-5p     | mir-10a-5p    | 0.282753945  | 0.227072407 | 0.582993208  | 0.006978533 |
| mir-451a      | mir-224-5p    | 0.159667111  | 0.50132282  | -0.211891858 | 0.369805442 |
| mir-224-5p    | mir-28-5p     | 0.4748087    | 0.034390976 | 0.712360433  | 0.000425026 |
| mir-182-5p    | mir-423-5p    | 0.593741774  | 0.005779278 | 0.298505042  | 0.201113948 |
| mir-27a-3p    | mir-30a-5p    | 0.34373549   | 0.137834675 | 0.625396117  | 0.003188922 |
| mir-451a      | mir-128-1-3p  | 0.099896871  | 0.675188955 | -0.268516345 | 0.25233423  |
| mir-451a      | mir-128-2-3p  | 0.099896871  | 0.675188955 | -0.268516345 | 0.25233423  |
| let-7i-5p     | mir-99a-5p    | -0.133267762 | 0.575394536 | 0.23660401   | 0.315210992 |
| mir-451a      | mir-484       | 0.692701046  | 0.000710917 | 0.444898465  | 0.049347722 |
| mir-92a-2-3p  | mir-28-5p     | -0.531191988 | 0.015949368 | -0.74712772  | 0.000153476 |
| mir-28-5p     | mir-92a-1-3p  | -0.531191988 | 0.015949368 | -0.74712772  | 0.000153476 |
| mir-361-5p    | mir-106a-5p   | -0.484822716 | 0.03026815  | -0.718132766 | 0.000362576 |
| mir-151a-5p   | mir-23a-3p    | 0.314804779  | 0.176416653 | 0.604429159  | 0.004760313 |
| mir-15a-5p    | mir-186-5p    | 0.819036299  | 1.00E-05    | 0.652563925  | 0.001816276 |
| mir-22-3p     | mir-107       | 0.819700397  | 9.74E-06    | 0.653738225  | 0.001770466 |
| mir-26b-5p    | mir-194-2-5p  | 0.805118564  | 1.85E-05    | 0.628812644  | 0.002979415 |
| mir-26b-5p    | mir-194-1-5p  | 0.805118564  | 1.85E-05    | 0.628812644  | 0.002979415 |
| mir-26b-5p    | mir-106b-3p   | 0.916860344  | 1.33E-08    | 0.832381257  | 5.31E-06    |
| mir-532-5p    | mir-199a-2-3p | -0.523366132 | 0.01787855  | -0.741548994 | 0.000182636 |
| mir-532-5p    | mir-199a-1-3p | -0.523366132 | 0.01787855  | -0.741548994 | 0.000182636 |
| mir-532-5p    | mir-199b-3p   | -0.523366132 | 0.01787855  | -0.741548994 | 0.000182636 |
| mir-98-5p     | mir-140-5p    | 0.62967054   | 0.002928646 | 0.35226176   | 0.12769947  |
| mir-181a-2-5p | mir-223-3p    | 0.663430667  | 0.001428002 | 0.82479255   | 7.68E-06    |
| mir-223-3p    | mir-181a-1-5p | 0.663430667  | 0.001428002 | 0.82479255   | 7.68E-06    |
| mir-27b-3p    | let-7b-5p     | -0.472305106 | 0.035487114 | -0.70916006  | 0.000463433 |
| mir-25-3p     | mir-27a-3p    | 0.657417495  | 0.001633157 | 0.393956614  | 0.085671032 |
| mir-151a-3p   | mir-23a-3p    | 0.684321571  | 0.000874894 | 0.83633745   | 4.35E-06    |
| mir-29a-3p    | mir-99b-5p    | -0.060620771 | 0.799587386 | 0.301122272  | 0.197001048 |
| mir-27b-3p    | mir-320a      | -0.242612101 | 0.3027125   | -0.550416362 | 0.011912115 |
| mir-146b-5p   | mir-584-5p    | 0.551341307  | 0.011741036 | 0.757976401  | 0.000108028 |
| mir-186-5p    | mir-93-5p     | 0.927133196  | 4.21E-09    | 0.852891068  | 1.77E-06    |
| let-7a-3-5p   | mir-28-3p     | 0.506262409  | 0.022745352 | 0.729838468  | 0.000259569 |
| let-7a-2-5p   | mir-28-3p     | 0.506262409  | 0.022745352 | 0.729838468  | 0.000259569 |
| let-7a-1-5p   | mir-28-3p     | 0.506262409  | 0.022745352 | 0.729838468  | 0.000259569 |
| mir-21-5p     | mir-223-3p    | 0.74177045   | 0.000181394 | 0.868008708  | 7.08E-07    |
| mir-744-5p    | mir-27a-3p    | -0.361195481 | 0.117660128 | -0.007813311 | 0.973919739 |
| mir-19b-2-3p  | mir-425-5p    | 0.843635975  | 2.96E-06    | 0.697971418  | 0.000621752 |
| mir-425-5p    | mir-19b-1-3p  | 0.843635975  | 2.96E-06    | 0.697971418  | 0.000621752 |
| mir-16-2-5p   | mir-186-5p    | 0.93738267   | 1.12E-09    | 0.873108547  | 5.07E-07    |
| mir-16-1-5p   | mir-186-5p    | 0.93738267   | 1.12E-09    | 0.873108547  | 5.07E-07    |
| let-7f-2-5p   | mir-361-5p    | 0.759665576  | 0.000102116 | 0.877633603  | 3.72E-07    |
| mir-361-5p    | let-7f-1-5p   | 0.759665576  | 0.000102116 | 0.877633603  | 3.72E-07    |
| mir-423-5p    | mir-150-5p    | -0.262649242 | 0.263244593 | 0.100250676  | 0.674099166 |
| mir-106b-3p   | mir-375       | -0.20289028  | 0.390945805 | 0.16232043   | 0.494143286 |
| let-7i-5p     | mir-146a-5p   | 0.247279542  | 0.29321402  | 0.552524333  | 0.011525126 |
| mir-26a-2-5p  | mir-106b-3p   | -0.433094001 | 0.056458453 | -0.682122401 | 0.000922868 |
| mir-106b-3p   | mir-26a-1-5p  | -0.433094001 | 0.056458453 | -0.682122401 | 0.000922868 |
| mir-199a-1-5p | mir-99a-5p    | -0.330082386 | 0.155221777 | 0.026153747  | 0.912845523 |
| mir-99a-5p    | mir-199a-2-5p | -0.330082386 | 0.155221777 | 0.026153747  | 0.912845523 |
| mir-107       | mir-150-5p    | 0.011410214  | 0.961920561 | 0.363049814  | 0.115649353 |
| mir-106a-5p   | mir-185-5p    | 0.901890002  | 5.58E-08    | 0.80522695   | 1.84E-05    |

|               |               |              |             |              |             |
|---------------|---------------|--------------|-------------|--------------|-------------|
| mir-185-5p    | cpeptide      | -0.223067339 | 0.344485596 | 0.14110872   | 0.552909649 |
| mir-106a-5p   | mir-10b-5p    | -0.038107988 | 0.873268787 | 0.31911971   | 0.170241196 |
| mir-629-5p    | mir-99a-5p    | 0.060520443  | 0.799912624 | -0.298565317 | 0.201018588 |
| mir-125b-1-5p | mir-375       | 0.508211317  | 0.022142928 | 0.730020972  | 0.000258185 |
| mir-375       | mir-125b-2-5p | 0.508211317  | 0.022142928 | 0.730020972  | 0.000258185 |
| mir-16-2-5p   | mir-15b-5p    | 0.647777243  | 0.002013413 | 0.382570381  | 0.095957911 |
| mir-16-1-5p   | mir-15b-5p    | 0.647777243  | 0.002013413 | 0.382570381  | 0.095957911 |
| mir-151a-5p   | mir-28-3p     | 0.289497093  | 0.215705155 | 0.582562873  | 0.007030491 |
| mir-148a-3p   | mir-185-5p    | 0.246511661  | 0.29476399  | -0.115961845 | 0.626362524 |
| mir-423-3p    | mir-340-5p    | 0.745916202  | 0.000159444 | 0.869700787  | 6.35E-07    |
| mir-19b-2-3p  | mir-126-5p    | 0.481516559  | 0.031583967 | 0.155958644  | 0.511441296 |
| mir-19b-1-3p  | mir-126-5p    | 0.481516559  | 0.031583967 | 0.155958644  | 0.511441296 |
| mir-103a-2-3p | mir-151a-5p   | 0.344646214  | 0.136725904 | 0.621153236  | 0.003466005 |
| mir-103a-1-3p | mir-151a-5p   | 0.344646214  | 0.136725904 | 0.621153236  | 0.003466005 |
| mir-199a-1-5p | mir-543       | 0.544625002  | 0.013029695 | 0.238569482  | 0.311088661 |
| mir-543       | mir-199a-2-5p | 0.544625002  | 0.013029695 | 0.238569482  | 0.311088661 |
| mir-222-3p    | mir-26b-5p    | 0.782901576  | 4.49E-05    | 0.889649553  | 1.53E-07    |
| mir-484       | cpeptide      | -0.281884252 | 0.228566348 | 0.077466323  | 0.745467874 |
| mir-320a      | mir-150-5p    | 0.044827007  | 0.851144917 | 0.390342816  | 0.088843365 |
| mir-16-2-5p   | mir-10b-5p    | -0.042190668 | 0.859813809 | 0.314099124  | 0.17744089  |
| mir-10b-5p    | mir-16-1-5p   | -0.042190668 | 0.859813809 | 0.314099124  | 0.17744089  |
| mir-30d-5p    | mir-375       | -0.17686213  | 0.455707656 | 0.186313551  | 0.431578877 |
| mir-320a      | mir-375       | -0.148160983 | 0.533029765 | 0.214566523  | 0.363651621 |
| mir-151a-3p   | mir-320a      | 0.190060172  | 0.422205159 | -0.172861134 | 0.466126537 |
| mir-125a-5p   | mir-151a-3p   | 0.519206706  | 0.018977313 | 0.736212537  | 0.000214844 |
| mir-146b-5p   | mir-543       | 0.801264758  | 2.18E-05    | 0.6263975    | 0.003126286 |
| let-7d-5p     | mir-93-5p     | -0.205527313 | 0.384684432 | -0.519060985 | 0.019016761 |
| mir-3615      | mir-150-5p    | 0.22769316   | 0.334308817 | 0.535611829  | 0.014935966 |
| let-7f-2-5p   | mir-20b-5p    | -0.308018853 | 0.186434014 | -0.594375027 | 0.005714285 |
| let-7f-1-5p   | mir-20b-5p    | -0.308018853 | 0.186434014 | -0.594375027 | 0.005714285 |
| mir-10b-5p    | mir-28-3p     | 0.038302874  | 0.872625725 | -0.316476956 | 0.174005627 |
| mir-92a-2-3p  | mir-126-5p    | -0.295921141 | 0.205230219 | -0.585629274 | 0.006667079 |
| mir-126-5p    | mir-92a-1-3p  | -0.295921141 | 0.205230219 | -0.585629274 | 0.006667079 |
| mir-92a-2-3p  | mir-584-5p    | -0.34329871  | 0.138368677 | -0.619215388 | 0.003599045 |
| mir-584-5p    | mir-92a-1-3p  | -0.34329871  | 0.138368677 | -0.619215388 | 0.003599045 |
| mir-584-5p    | mir-451a      | -0.44407808  | 0.049818508 | -0.687474681 | 0.000809796 |
| mir-140-5p    | mir-25-3p     | 0.563980412  | 0.009595939 | 0.266699733  | 0.255681095 |
| mir-25-3p     | mir-223-3p    | -0.113453135 | 0.633895699 | -0.445534716 | 0.048984955 |
| mir-22-3p     | mir-30e-5p    | 0.861555383  | 1.06E-06    | 0.930806266  | 2.68E-09    |
| let-7d-5p     | mir-106b-3p   | -0.387444784 | 0.091449164 | -0.649071162 | 0.001958438 |
| mir-29a-3p    | mir-106b-3p   | 0.349184135  | 0.131294784 | -0.000243574 | 0.999186835 |
| mir-146b-5p   | mir-629-5p    | -0.705246716 | 0.000514368 | -0.846002958 | 2.61E-06    |
| let-7b-5p     | mir-15b-5p    | 0.507605075  | 0.02232895  | 0.192796708  | 0.415428135 |
| mir-7-3-5p    | mir-128-1-3p  | 0.118236816  | 0.619561861 | -0.240623985 | 0.306814515 |
| mir-7-3-5p    | mir-128-2-3p  | 0.118236816  | 0.619561861 | -0.240623985 | 0.306814515 |
| mir-7-1-5p    | mir-128-1-3p  | 0.118236816  | 0.619561861 | -0.240623985 | 0.306814515 |
| mir-7-1-5p    | mir-128-2-3p  | 0.118236816  | 0.619561861 | -0.240623985 | 0.306814515 |
| mir-128-1-3p  | mir-7-2-5p    | 0.118236816  | 0.619561861 | -0.240623985 | 0.306814515 |
| mir-7-2-5p    | mir-128-2-3p  | 0.118236816  | 0.619561861 | -0.240623985 | 0.306814515 |
| mir-191-5p    | mir-30c-1-5p  | 0.831585828  | 5.52E-06    | 0.679995695  | 0.000971355 |
| mir-191-5p    | mir-30c-2-5p  | 0.831585828  | 5.52E-06    | 0.679995695  | 0.000971355 |
| mir-191-5p    | mir-486-2-5p  | -0.124411416 | 0.601254469 | -0.453567233 | 0.044578761 |
| mir-151a-3p   | mir-30c-1-5p  | 0.461371065  | 0.040596715 | 0.697816508  | 0.000624231 |
| mir-151a-3p   | mir-30c-2-5p  | 0.461371065  | 0.040596715 | 0.697816508  | 0.000624231 |
| mir-27b-3p    | mir-92a-2-3p  | -0.590762437 | 0.006093273 | -0.778941415 | 5.20E-05    |
| mir-27b-3p    | mir-92a-1-3p  | -0.590762437 | 0.006093273 | -0.778941415 | 5.20E-05    |
| mir-192-5p    | mir-20b-5p    | 0.839830765  | 3.63E-06    | 0.694626058  | 0.000677171 |
| let-7b-5p     | mir-99a-5p    | 0.22953361   | 0.330309646 | -0.128379493 | 0.589608644 |
| mir-22-3p     | mir-30d-5p    | 0.106744092  | 0.654211071 | 0.438094796  | 0.053356812 |
| mir-222-3p    | mir-148b-3p   | 0.379667612  | 0.098718934 | 0.03704896   | 0.876764573 |
| mir-30c-1-5p  | let-7d-3p     | 0.842011737  | 3.23E-06    | 0.699086453  | 0.000604157 |
| let-7d-3p     | mir-30c-2-5p  | 0.842011737  | 3.23E-06    | 0.699086453  | 0.000604157 |
| mir-106a-5p   | mir-101-1-3p  | 0.942141124  | 5.59E-10    | 0.884100993  | 2.34E-07    |
| mir-106a-5p   | mir-101-2-3p  | 0.942141124  | 5.59E-10    | 0.884100993  | 2.34E-07    |

|               |               |              |             |              |             |
|---------------|---------------|--------------|-------------|--------------|-------------|
| mir-3615      | mir-192-5p    | 0.871988447  | 5.46E-07    | 0.752575839  | 0.000128945 |
| mir-224-5p    | mir-151a-3p   | 0.503351898  | 0.023669137 | 0.724104207  | 0.000306371 |
| mir-125a-5p   | mir-223-3p    | 0.746286183  | 0.000157601 | 0.538786901  | 0.01424044  |
| mir-122-5p    | mir-125b-1-5p | 0.634261245  | 0.002669046 | 0.368289538  | 0.110101107 |
| mir-122-5p    | mir-125b-2-5p | 0.634261245  | 0.002669046 | 0.368289538  | 0.110101107 |
| mir-122-5p    | mir-374b-5p   | -0.094800905 | 0.690953617 | 0.259983415  | 0.268298644 |
| mir-126-3p    | mir-451a      | -0.186731349 | 0.430528159 | -0.500528893 | 0.024593288 |
| mir-16-2-5p   | let-7i-5p     | 0.450489994  | 0.046229134 | 0.123806937  | 0.603036832 |
| let-7i-5p     | mir-16-1-5p   | 0.450489994  | 0.046229134 | 0.123806937  | 0.603036832 |
| let-7d-5p     | mir-363-3p    | -0.378339543 | 0.100001279 | -0.640390841 | 0.002352564 |
| mir-15a-5p    | mir-20a-5p    | 0.76672458   | 8.03E-05    | 0.572852402  | 0.008289857 |
| mir-23a-3p    | mir-28-3p     | 0.612448055  | 0.004097318 | 0.790706214  | 3.33E-05    |
| mir-181a-2-5p | let-7d-5p     | 0.602562601  | 0.004926702 | 0.784647013  | 4.20E-05    |
| let-7d-5p     | mir-181a-1-5p | 0.602562601  | 0.004926702 | 0.784647013  | 4.20E-05    |
| mir-140-5p    | mir-27a-3p    | 0.452039539  | 0.045392318 | 0.689710951  | 0.000766152 |
| mir-140-5p    | mir-20b-5p    | 0.551917604  | 0.011635453 | 0.255393951  | 0.277141312 |
| mir-144-3p    | mir-224-5p    | 0.099520229  | 0.676349767 | -0.254105686 | 0.279655669 |
| mir-744-5p    | mir-10a-5p    | 0.151237908  | 0.524461028 | 0.471532867  | 0.035830653 |
| mir-425-5p    | norepi        | 0.342609432  | 0.13921434  | -0.00256109  | 0.991450025 |
| mir-425-5p    | mir-107       | 0.785071064  | 4.13E-05    | 0.603767473  | 0.004818758 |
| mir-26a-2-5p  | mir-15a-5p    | -0.548252378 | 0.012320254 | -0.750859961 | 0.000136279 |
| mir-15a-5p    | mir-26a-1-5p  | -0.548252378 | 0.012320254 | -0.750859961 | 0.000136279 |
| mir-24-2-3p   | mir-148b-3p   | 0.121807868  | 0.60894668  | 0.447395141  | 0.047935926 |
| mir-148b-3p   | mir-24-1-3p   | 0.121807868  | 0.60894668  | 0.447395141  | 0.047935926 |
| mir-151a-3p   | mir-93-5p     | 0.026178841  | 0.912762208 | -0.321026145 | 0.167560471 |
| mir-98-5p     | mir-320a      | -0.026072466 | 0.913115403 | -0.366921876 | 0.111530388 |
| mir-15a-5p    | mir-128-1-3p  | -0.295003803 | 0.206704936 | -0.580021985 | 0.007343772 |
| mir-15a-5p    | mir-128-2-3p  | -0.295003803 | 0.206704936 | -0.580021985 | 0.007343772 |
| mir-1307-3p   | mir-543       | 0.375728181  | 0.102558039 | 0.637219042  | 0.00251217  |
| mir-126-3p    | mir-374b-5p   | 0.697693123  | 0.000626211 | 0.839967196  | 3.60E-06    |
| mir-143-3p    | mir-99a-5p    | 0.245043303  | 0.297741816 | -0.107705484 | 0.65128509  |
| mir-26b-5p    | let-7i-5p     | 0.494027436  | 0.02683025  | 0.181103188  | 0.444795844 |
| mir-3615      | mir-1307-3p   | -0.561036772 | 0.010064523 | -0.758384134 | 0.000106575 |
| mir-223-3p    | mir-125b-1-5p | -0.112951468 | 0.635406309 | 0.239803203  | 0.308517769 |
| mir-223-3p    | mir-125b-2-5p | -0.112951468 | 0.635406309 | 0.239803203  | 0.308517769 |
| mir-29a-3p    | mir-20b-5p    | 0.468613117  | 0.03715299  | 0.149336102  | 0.529749628 |
| mir-629-5p    | mir-363-3p    | 0.919625807  | 9.90E-09    | 0.842229316  | 3.20E-06    |
| mir-29a-3p    | mir-3615      | 0.449511419  | 0.04676368  | 0.125676497  | 0.597531311 |
| mir-423-5p    | cpeptide      | -0.244819319 | 0.298197663 | 0.107303612  | 0.652507588 |
| mir-92a-2-3p  | mir-10b-5p    | -0.297109754 | 0.203329814 | 0.051134951  | 0.830471303 |
| mir-10b-5p    | mir-92a-1-3p  | -0.297109754 | 0.203329814 | 0.051134951  | 0.830471303 |
| mir-126-3p    | mir-126-5p    | 0.651044896  | 0.001877002 | 0.812551462  | 1.34E-05    |
| mir-16-2-5p   | cpeptide      | -0.155504345 | 0.512687502 | 0.197853037  | 0.403062067 |
| mir-16-1-5p   | cpeptide      | -0.155504345 | 0.512687502 | 0.197853037  | 0.403062067 |
| mir-222-3p    | mir-30c-1-5p  | -0.306756375 | 0.188339161 | 0.040287445  | 0.866081713 |
| mir-222-3p    | mir-30c-2-5p  | -0.306756375 | 0.188339161 | 0.040287445  | 0.866081713 |
| mir-24-2-3p   | mir-30e-5p    | -0.181519047 | 0.443733272 | 0.171914656  | 0.468608772 |
| mir-30e-5p    | mir-24-1-3p   | -0.181519047 | 0.443733272 | 0.171914656  | 0.468608772 |
| mir-181b-2-5p | mir-532-5p    | 0.517158245  | 0.019537889 | 0.212496918  | 0.368408184 |
| mir-532-5p    | mir-181b-1-5p | 0.517158245  | 0.019537889 | 0.212496918  | 0.368408184 |
| mir-224-5p    | mir-99a-5p    | 0.369727853  | 0.108612297 | 0.63200697   | 0.002794017 |
| mir-125b-1-5p | let-7g-5p     | 0.00815382   | 0.972783539 | 0.349102721  | 0.131390856 |
| let-7g-5p     | mir-125b-2-5p | 0.00815382   | 0.972783539 | 0.349102721  | 0.131390856 |
| mir-199a-1-5p | mir-25-3p     | -0.485370573 | 0.030054325 | -0.709504537 | 0.000459162 |
| mir-25-3p     | mir-199a-2-5p | -0.485370573 | 0.030054325 | -0.709504537 | 0.000459162 |
| mir-143-3p    | mir-15b-5p    | -0.563492    | 0.009672434 | -0.274688457 | 0.241172245 |
| mir-106a-5p   | mir-23a-3p    | -0.263443631 | 0.261750228 | -0.555105412 | 0.01106521  |
| let-7d-5p     | mir-30c-1-5p  | 0.82537209   | 7.47E-06    | 0.673756024  | 0.0011262   |
| let-7d-5p     | mir-30c-2-5p  | 0.82537209   | 7.47E-06    | 0.673756024  | 0.0011262   |
| mir-128-1-3p  | mir-15b-5p    | 0.357217246  | 0.122058302 | 0.622747309  | 0.003359651 |
| mir-128-2-3p  | mir-15b-5p    | 0.357217246  | 0.122058302 | 0.622747309  | 0.003359651 |
| mir-30d-5p    | mir-20b-5p    | 0.065202509  | 0.784769247 | -0.282027355 | 0.228320091 |
| mir-101-1-3p  | mir-107       | 0.942783326  | 5.07E-10    | 0.886954539  | 1.89E-07    |
| mir-107       | mir-101-2-3p  | 0.942783326  | 5.07E-10    | 0.886954539  | 1.89E-07    |

|               |               |              |             |              |             |
|---------------|---------------|--------------|-------------|--------------|-------------|
| mir-139-5p    | copeptin      | -0.087137087 | 0.71489264  | -0.41562639  | 0.068375528 |
| mir-27a-3p    | let-7d-3p     | -0.024206221 | 0.919314361 | 0.319159886  | 0.170184402 |
| mir-7-3-5p    | mir-15b-5p    | 0.544901994  | 0.012974385 | 0.250882971  | 0.286007388 |
| mir-7-1-5p    | mir-15b-5p    | 0.544901994  | 0.012974385 | 0.250882971  | 0.286007388 |
| mir-7-2-5p    | mir-15b-5p    | 0.544901994  | 0.012974385 | 0.250882971  | 0.286007388 |
| mir-532-5p    | mir-125b-1-5p | 0.28717165   | 0.219582107 | -0.059024884 | 0.80476456  |
| mir-532-5p    | mir-125b-2-5p | 0.28717165   | 0.219582107 | -0.059024884 | 0.80476456  |
| mir-423-5p    | mir-186-5p    | 0.795870276  | 2.71E-05    | 0.624714566  | 0.003232147 |
| mir-221-3p    | mir-20b-5p    | -0.373413751 | 0.104863489 | -0.633309831 | 0.00272121  |
| mir-19b-2-3p  | mir-122-5p    | 0.014593539  | 0.951307558 | -0.327207824 | 0.159067785 |
| mir-122-5p    | mir-19b-1-3p  | 0.014593539  | 0.951307558 | -0.327207824 | 0.159067785 |
| mir-181b-2-5p | cpeptide      | -0.056611918 | 0.812607215 | 0.289060175  | 0.21643012  |
| mir-181b-1-5p | cpeptide      | -0.056611918 | 0.812607215 | 0.289060175  | 0.21643012  |
| mir-15a-5p    | mir-23a-3p    | -0.521169854 | 0.0184522   | -0.731487462 | 0.000247298 |
| mir-15a-5p    | mir-150-5p    | -0.085290114 | 0.720701441 | 0.261927015  | 0.264607866 |
| mir-16-2-5p   | mir-199a-2-3p | -0.274430426 | 0.24163241  | -0.561663209 | 0.009963278 |
| mir-16-2-5p   | mir-199a-1-3p | -0.274430426 | 0.24163241  | -0.561663209 | 0.009963278 |
| mir-16-2-5p   | mir-199b-3p   | -0.274430426 | 0.24163241  | -0.561663209 | 0.009963278 |
| mir-199a-2-3p | mir-16-1-5p   | -0.274430426 | 0.24163241  | -0.561663209 | 0.009963278 |
| mir-16-1-5p   | mir-199a-1-3p | -0.274430426 | 0.24163241  | -0.561663209 | 0.009963278 |
| mir-16-1-5p   | mir-199b-3p   | -0.274430426 | 0.24163241  | -0.561663209 | 0.009963278 |
| mir-222-3p    | norepi        | 0.040731053  | 0.864620072 | -0.302754472 | 0.194464781 |
| mir-92a-2-3p  | mir-23a-3p    | -0.628806234 | 0.002979797 | -0.797873341 | 2.50E-05    |
| mir-23a-3p    | mir-92a-1-3p  | -0.628806234 | 0.002979797 | -0.797873341 | 2.50E-05    |
| mir-194-2-5p  | mir-363-3p    | 0.8123159    | 1.36E-05    | 0.653013136  | 0.001798636 |
| mir-194-1-5p  | mir-363-3p    | 0.8123159    | 1.36E-05    | 0.653013136  | 0.001798636 |
| mir-28-5p     | cpeptide      | 0.083433271  | 0.726556169 | -0.263250283 | 0.262113451 |
| mir-26b-5p    | mir-146a-5p   | -0.298431242 | 0.201230745 | -0.578860471 | 0.007490738 |
| let-7i-5p     | mir-148b-3p   | 0.55046508   | 0.011903054 | 0.749400194  | 0.000142797 |
| mir-192-5p    | mir-125a-5p   | -0.585906749 | 0.006634969 | -0.3085922   | 0.185573113 |
| mir-361-5p    | mir-224-5p    | 0.42855852   | 0.059388273 | 0.669838791  | 0.001233653 |
| mir-423-3p    | mir-224-5p    | 0.083068911  | 0.727706745 | 0.409764968  | 0.072769603 |
| mir-148b-3p   | mir-221-3p    | 0.083452359  | 0.726495909 | 0.410069591  | 0.07253617  |
| mir-126-3p    | mir-27b-3p    | 0.812375098  | 1.35E-05    | 0.902589555  | 5.24E-08    |
| mir-144-3p    | mir-20a-5p    | 0.892569319  | 1.22E-07    | 0.794158621  | 2.90E-05    |
| let-7d-5p     | mir-126-5p    | 0.439299384  | 0.052629501 | 0.676781489  | 0.001048708 |
| mir-29a-3p    | mir-320a      | 0.422630722  | 0.06338941  | 0.098785847  | 0.678615154 |
| mir-20a-5p    | mir-28-3p     | -0.088607212 | 0.710279784 | -0.414121998 | 0.069483801 |
| mir-181a-2-5p | mir-143-3p    | -0.230259733 | 0.328739649 | 0.116642536  | 0.624324628 |
| mir-143-3p    | mir-181a-1-5p | -0.230259733 | 0.328739649 | 0.116642536  | 0.624324628 |
| mir-24-2-3p   | mir-221-3p    | 0.888392298  | 1.69E-07    | 0.943152454  | 4.79E-10    |
| mir-221-3p    | mir-24-1-3p   | 0.888392298  | 1.69E-07    | 0.943152454  | 4.79E-10    |
| mir-16-2-5p   | mir-629-5p    | 0.906395414  | 3.71E-08    | 0.819523077  | 9.82E-06    |
| mir-629-5p    | mir-16-1-5p   | 0.906395414  | 3.71E-08    | 0.819523077  | 9.82E-06    |
| mir-150-5p    | mir-126-5p    | 0.079532398  | 0.738903146 | -0.265330213 | 0.258222795 |
| mir-182-5p    | mir-125a-5p   | -0.541452232 | 0.013676922 | -0.743231722 | 0.000173379 |
| mir-106b-3p   | mir-27a-3p    | 0.537444446  | 0.014531263 | 0.244208992  | 0.299441946 |
| mir-361-5p    | mir-10b-5p    | 0.195333008  | 0.40919981  | -0.15220894  | 0.521770319 |
| mir-584-5p    | mir-106b-3p   | -0.346178471 | 0.134874651 | -0.61214753  | 0.004120705 |
| mir-451a      | mir-191-5p    | -0.210609655 | 0.372776345 | -0.511709507 | 0.021093426 |
| mir-27b-3p    | mir-1307-3p   | 0.521571753  | 0.018346143 | 0.730434212  | 0.000255077 |
| mir-584-5p    | mir-30a-5p    | -0.291800203 | 0.2119101   | 0.050316495  | 0.83314795  |
| mir-144-3p    | mir-128-1-3p  | 0.137531757  | 0.563118068 | -0.20932688  | 0.375762042 |
| mir-144-3p    | mir-128-2-3p  | 0.137531757  | 0.563118068 | -0.20932688  | 0.375762042 |
| mir-16-2-5p   | mir-584-5p    | -0.31560492  | 0.175260149 | -0.589970156 | 0.006179089 |
| mir-584-5p    | mir-16-1-5p   | -0.31560492  | 0.175260149 | -0.589970156 | 0.006179089 |
| mir-106a-5p   | let-7d-5p     | -0.373527615 | 0.104749196 | -0.631033515 | 0.002849469 |
| let-7a-3-5p   | mir-20b-5p    | -0.243194807 | 0.301516569 | -0.536099032 | 0.014827502 |
| let-7a-2-5p   | mir-20b-5p    | -0.243194807 | 0.301516569 | -0.536099032 | 0.014827502 |
| let-7a-1-5p   | mir-20b-5p    | -0.243194807 | 0.301516569 | -0.536099032 | 0.014827502 |
| mir-194-2-5p  | mir-107       | 0.820884547  | 9.22E-06    | 0.669196439  | 0.001252071 |
| mir-194-1-5p  | mir-107       | 0.820884547  | 9.22E-06    | 0.669196439  | 0.001252071 |
| mir-224-5p    | mir-363-3p    | 0.091367959  | 0.701643576 | -0.252925998 | 0.281970492 |
| mir-92a-2-3p  | mir-181b-2-5p | 0.362755303  | 0.11596705  | 0.029996105  | 0.900098714 |

|               |               |              |             |              |             |
|---------------|---------------|--------------|-------------|--------------|-------------|
| mir-92a-2-3p  | mir-181b-1-5p | 0.362755303  | 0.11596705  | 0.029996105  | 0.900098714 |
| mir-181b-2-5p | mir-92a-1-3p  | 0.362755303  | 0.11596705  | 0.029996105  | 0.900098714 |
| mir-181b-1-5p | mir-92a-1-3p  | 0.362755303  | 0.11596705  | 0.029996105  | 0.900098714 |
| mir-27b-3p    | mir-16-2-5p   | -0.265635815 | 0.257654244 | -0.552599472 | 0.011511522 |
| mir-27b-3p    | mir-16-1-5p   | -0.265635815 | 0.257654244 | -0.552599472 | 0.011511522 |
| mir-29a-3p    | mir-375       | 0.639076034  | 0.002417666 | 0.385929943  | 0.092833366 |
| mir-146a-5p   | mir-10a-5p    | 0.226504177  | 0.33690749  | 0.522721403  | 0.018045449 |
| mir-185-5p    | mir-363-3p    | 0.892047532  | 1.27E-07    | 0.794049543  | 2.92E-05    |
| let-7i-5p     | let-7d-3p     | 0.401210923  | 0.079556416 | 0.649539048  | 0.001938871 |
| mir-139-5p    | mir-30e-5p    | 0.003068854  | 0.98975498  | 0.338460971  | 0.144380859 |
| mir-29a-3p    | mir-486-2-5p  | 0.407927767  | 0.074189375 | 0.083879989  | 0.725146296 |
| mir-192-5p    | mir-30c-1-5p  | -0.424807196 | 0.061897395 | -0.104124314 | 0.662208895 |
| mir-192-5p    | mir-30c-2-5p  | -0.424807196 | 0.061897395 | -0.104124314 | 0.662208895 |
| mir-146a-5p   | mir-3615      | -0.517103242 | 0.019553121 | -0.726515681 | 0.00028588  |
| mir-128-1-3p  | mir-99a-5p    | 0.213473516  | 0.366159282 | 0.512175534  | 0.02095665  |
| mir-128-2-3p  | mir-99a-5p    | 0.213473516  | 0.366159282 | 0.512175534  | 0.02095665  |
| let-7f-2-5p   | mir-146b-5p   | 0.880331174  | 3.07E-07    | 0.938592393  | 9.43E-10    |
| mir-146b-5p   | let-7f-1-5p   | 0.880331174  | 3.07E-07    | 0.938592393  | 9.43E-10    |
| mir-29a-3p    | mir-150-5p    | 0.565301054  | 0.00939156  | 0.283743574  | 0.225380196 |
| mir-101-1-3p  | mir-20b-5p    | 0.928747517  | 3.46E-09    | 0.861888362  | 1.04E-06    |
| mir-101-2-3p  | mir-20b-5p    | 0.928747517  | 3.46E-09    | 0.861888362  | 1.04E-06    |
| mir-21-5p     | mir-10b-5p    | 0.190683618  | 0.420656014 | -0.154146561 | 0.516420691 |
| mir-29a-3p    | mir-106a-5p   | 0.437617823  | 0.05364691  | 0.120531035  | 0.612733653 |
| mir-1307-3p   | norepi        | -0.007256433 | 0.975778014 | 0.328154951  | 0.157793378 |
| mir-361-5p    | mir-15b-5p    | -0.07352094  | 0.758050595 | 0.267627976  | 0.253967429 |
| mir-7-3-5p    | mir-27a-3p    | 0.639023549  | 0.002420296 | 0.387410385  | 0.091480428 |
| mir-7-1-5p    | mir-27a-3p    | 0.639023549  | 0.002420296 | 0.387410385  | 0.091480428 |
| mir-27a-3p    | mir-7-2-5p    | 0.639023549  | 0.002420296 | 0.387410385  | 0.091480428 |
| mir-125a-5p   | mir-629-5p    | -0.650964563 | 0.001880261 | -0.809198192 | 1.56E-05    |
| mir-16-2-5p   | mir-185-5p    | 0.948252466  | 2.09E-10    | 0.898911837  | 7.22E-08    |
| mir-16-1-5p   | mir-185-5p    | 0.948252466  | 2.09E-10    | 0.898911837  | 7.22E-08    |
| mir-10b-5p    | mir-451a      | 0.060786606  | 0.799049864 | 0.386900788  | 0.091944491 |
| mir-10b-5p    | mir-378a-3p   | 0.004266936  | 0.985755653 | 0.33768579   | 0.145360956 |
| mir-543       | mir-28-3p     | 0.302990373  | 0.194100036 | 0.578283783  | 0.007564595 |
| mir-423-3p    | mir-10a-5p    | -0.203088161 | 0.390474005 | 0.14018766   | 0.555530347 |
| mir-16-2-5p   | mir-194-2-5p  | 0.856210495  | 1.46E-06    | 0.731504684  | 0.000247173 |
| mir-16-2-5p   | mir-194-1-5p  | 0.856210495  | 1.46E-06    | 0.731504684  | 0.000247173 |
| mir-194-2-5p  | mir-16-1-5p   | 0.856210495  | 1.46E-06    | 0.731504684  | 0.000247173 |
| mir-194-1-5p  | mir-16-1-5p   | 0.856210495  | 1.46E-06    | 0.731504684  | 0.000247173 |
| mir-361-5p    | mir-191-5p    | 0.70431954   | 0.000527109 | 0.840437114  | 3.51E-06    |
| mir-543       | norepi        | -0.04558717  | 0.84864833  | 0.292412715  | 0.210908273 |
| mir-10b-5p    | mir-186-5p    | -0.194716909 | 0.410708058 | 0.148412821  | 0.532326013 |
| mir-98-5p     | mir-374b-5p   | 0.853653612  | 1.70E-06    | 0.727196516  | 0.000280311 |
| mir-126-5p    | mir-93-5p     | 0.356169457  | 0.123235961 | 0.025961369  | 0.913484292 |
| mir-103a-2-3p | let-7d-3p     | 0.610341128  | 0.00426362  | 0.784120144  | 4.28E-05    |
| mir-103a-1-3p | let-7d-3p     | 0.610341128  | 0.00426362  | 0.784120144  | 4.28E-05    |
| let-7f-2-5p   | mir-10a-5p    | 0.361428216  | 0.117406393 | 0.619905645  | 0.003551179 |
| let-7f-1-5p   | mir-10a-5p    | 0.361428216  | 0.117406393 | 0.619905645  | 0.003551179 |
| mir-125a-5p   | cpeptide      | 0.010951038  | 0.963451973 | -0.323280869 | 0.164427562 |
| mir-24-2-3p   | mir-150-5p    | 0.375012338  | 0.103267134 | 0.048083837  | 0.840458463 |
| mir-150-5p    | mir-24-1-3p   | 0.375012338  | 0.103267134 | 0.048083837  | 0.840458463 |
| mir-98-5p     | mir-107       | 0.007178353  | 0.976038573 | -0.326370864 | 0.160199862 |
| mir-25-3p     | mir-374b-5p   | 0.037499144  | 0.875278273 | -0.298991343 | 0.200345446 |
| mir-10b-5p    | mir-320a      | -0.125095922 | 0.599238766 | 0.216107981  | 0.360131823 |
| mir-192-5p    | mir-99b-5p    | -0.511451156 | 0.021169555 | -0.216031554 | 0.360305875 |
| mir-101-1-3p  | let-7b-5p     | 0.924434542  | 5.79E-09    | 0.85474339   | 1.59E-06    |
| let-7b-5p     | mir-101-2-3p  | 0.924434542  | 5.79E-09    | 0.85474339   | 1.59E-06    |
| mir-146a-5p   | let-7b-5p     | -0.490784122 | 0.028004551 | -0.707487852 | 0.000484647 |
| mir-126-3p    | norepi        | 0.168258642  | 0.478259482 | 0.473576474  | 0.034927127 |
| mir-3615      | mir-125a-5p   | -0.721707655 | 0.000327963 | -0.512990954 | 0.020719027 |
| mir-122-5p    | mir-378a-3p   | 0.510027351  | 0.021593042 | 0.214990449  | 0.362681666 |
| mir-19b-2-3p  | mir-146a-5p   | -0.179345072 | 0.449302679 | -0.482063538 | 0.031363238 |
| mir-146a-5p   | mir-19b-1-3p  | -0.179345072 | 0.449302679 | -0.482063538 | 0.031363238 |
| let-7i-5p     | mir-199a-1-5p | 0.050306356  | 0.833181118 | 0.375240783  | 0.103040457 |

|               |               |              |             |              |             |
|---------------|---------------|--------------|-------------|--------------|-------------|
| let-7i-5p     | mir-199a-2-5p | 0.050306356  | 0.833181118 | 0.375240783  | 0.103040457 |
| mir-92a-2-3p  | copeptin      | -0.121259381 | 0.610572279 | 0.2186761    | 0.354311328 |
| mir-92a-1-3p  | copeptin      | -0.121259381 | 0.610572279 | 0.2186761    | 0.354311328 |
| mir-26a-2-5p  | mir-374b-5p   | 0.754828394  | 0.000119833 | 0.868799903  | 6.73E-07    |
| mir-374b-5p   | mir-26a-1-5p  | 0.754828394  | 0.000119833 | 0.868799903  | 6.73E-07    |
| mir-21-5p     | mir-194-2-5p  | -0.505464276 | 0.022995781 | -0.209546211 | 0.375250588 |
| mir-21-5p     | mir-194-1-5p  | -0.505464276 | 0.022995781 | -0.209546211 | 0.375250588 |
| mir-29a-3p    | mir-92a-2-3p  | 0.082216679  | 0.730400103 | -0.255685178 | 0.276574871 |
| mir-29a-3p    | mir-92a-1-3p  | 0.082216679  | 0.730400103 | -0.255685178 | 0.276574871 |
| mir-107       | mir-106b-3p   | 0.901870292  | 5.59E-08    | 0.813846647  | 1.27E-05    |
| let-7i-5p     | mir-7-3-5p    | 0.41812726   | 0.066562594 | 0.101442551  | 0.670432575 |
| let-7i-5p     | mir-7-1-5p    | 0.41812726   | 0.066562594 | 0.101442551  | 0.670432575 |
| let-7i-5p     | mir-7-2-5p    | 0.41812726   | 0.066562594 | 0.101442551  | 0.670432575 |
| mir-222-3p    | mir-99a-5p    | 0.376094605  | 0.102196443 | 0.051878394  | 0.828041529 |
| mir-92a-2-3p  | mir-484       | 0.319145492  | 0.170204749 | -0.01279725  | 0.957295411 |
| mir-484       | mir-92a-1-3p  | 0.319145492  | 0.170204749 | -0.01279725  | 0.957295411 |
| mir-126-3p    | mir-20b-5p    | -0.19933765  | 0.399469901 | -0.497055614 | 0.025769208 |
| mir-532-5p    | mir-99b-5p    | -0.789245308 | 3.52E-05    | -0.620669216 | 0.003498846 |
| mir-224-5p    | copeptin      | 0.216061637  | 0.360237358 | -0.123134512 | 0.60502209  |
| mir-21-5p     | mir-28-5p     | 0.711124599  | 0.000439523 | 0.843368609  | 3.01E-06    |
| mir-122-5p    | mir-99a-5p    | 0.910163847  | 2.60E-08    | 0.829108873  | 6.24E-06    |
| mir-486-2-5p  | mir-23a-3p    | -0.292194548 | 0.211264748 | -0.567629238 | 0.009039889 |
| let-7f-2-5p   | mir-194-2-5p  | -0.540417614 | 0.013893492 | -0.255879367 | 0.27619757  |
| let-7f-2-5p   | mir-194-1-5p  | -0.540417614 | 0.013893492 | -0.255879367 | 0.27619757  |
| mir-194-2-5p  | let-7f-1-5p   | -0.540417614 | 0.013893492 | -0.255879367 | 0.27619757  |
| mir-194-1-5p  | let-7f-1-5p   | -0.540417614 | 0.013893492 | -0.255879367 | 0.27619757  |
| mir-30c-1-5p  | mir-107       | -0.377627888 | 0.100693402 | -0.054556396 | 0.819301704 |
| mir-107       | mir-30c-2-5p  | -0.377627888 | 0.100693402 | -0.054556396 | 0.819301704 |
| mir-103a-2-3p | mir-484       | 0.654663398  | 0.00173506  | 0.414341221  | 0.069321468 |
| mir-103a-1-3p | mir-484       | 0.654663398  | 0.00173506  | 0.414341221  | 0.069321468 |
| mir-140-5p    | mir-486-2-5p  | 0.487304904  | 0.029308831 | 0.188325245  | 0.426532165 |
| mir-181a-2-5p | mir-25-3p     | 0.150595042  | 0.526245959 | -0.187575263 | 0.428409947 |
| mir-25-3p     | mir-181a-1-5p | 0.150595042  | 0.526245959 | -0.187575263 | 0.428409947 |
| mir-26b-5p    | mir-451a      | 0.883560902  | 2.43E-07    | 0.939447655  | 8.33E-10    |
| mir-1307-3p   | copeptin      | -0.366451803 | 0.112024713 | -0.042852372 | 0.857636479 |
| mir-125b-1-5p | mir-28-3p     | -0.253035996 | 0.28175415  | 0.082475608  | 0.729581473 |
| mir-28-3p     | mir-125b-2-5p | -0.253035996 | 0.28175415  | 0.082475608  | 0.729581473 |
| mir-181a-2-5p | mir-363-3p    | 0.065047522  | 0.785269369 | -0.269228564 | 0.251029712 |
| mir-363-3p    | mir-181a-1-5p | 0.065047522  | 0.785269369 | -0.269228564 | 0.251029712 |
| mir-194-2-5p  | mir-24-2-3p   | -0.333902279 | 0.150211431 | -0.006085328 | 0.979686319 |
| mir-194-2-5p  | mir-24-1-3p   | -0.333902279 | 0.150211431 | -0.006085328 | 0.979686319 |
| mir-24-2-3p   | mir-194-1-5p  | -0.333902279 | 0.150211431 | -0.006085328 | 0.979686319 |
| mir-194-1-5p  | mir-24-1-3p   | -0.333902279 | 0.150211431 | -0.006085328 | 0.979686319 |
| let-7a-3-5p   | mir-15a-5p    | -0.551954457 | 0.011628727 | -0.745238498 | 0.000162868 |
| let-7a-2-5p   | mir-15a-5p    | -0.551954457 | 0.011628727 | -0.745238498 | 0.000162868 |
| let-7a-1-5p   | mir-15a-5p    | -0.551954457 | 0.011628727 | -0.745238498 | 0.000162868 |
| mir-584-5p    | mir-224-5p    | 0.063630929  | 0.789844253 | 0.383918988  | 0.094694545 |
| mir-144-3p    | let-7d-3p     | -0.285096424 | 0.223080241 | -0.560605866 | 0.01013465  |
| mir-144-3p    | mir-30e-5p    | 0.816760375  | 1.11E-05    | 0.667691889  | 0.001296117 |
| mir-26b-5p    | mir-99a-5p    | 0.176453559  | 0.45676608  | -0.160031551 | 0.500333713 |
| mir-23a-3p    | mir-93-5p     | -0.143007672 | 0.547524108 | -0.449058514 | 0.047012681 |
| mir-148b-3p   | mir-186-5p    | 0.592982984  | 0.005857955 | 0.330228319  | 0.155028262 |
| mir-3615      | mir-20b-5p    | 0.807210816  | 1.69E-05    | 0.897281487  | 8.28E-08    |
| mir-30a-5p    | mir-28-5p     | 0.066402199  | 0.780900772 | 0.384676071  | 0.093990672 |
| mir-199a-1-5p | mir-629-5p    | -0.460810594 | 0.040873182 | -0.684390994 | 0.000873414 |
| mir-629-5p    | mir-199a-2-5p | -0.460810594 | 0.040873182 | -0.684390994 | 0.000873414 |
| mir-584-5p    | mir-30c-1-5p  | 0.731447604  | 0.000247589 | 0.532004001  | 0.015759164 |
| mir-584-5p    | mir-30c-2-5p  | 0.731447604  | 0.000247589 | 0.532004001  | 0.015759164 |
| mir-199a-1-5p | mir-451a      | -0.448519357 | 0.047310428 | -0.675869397 | 0.001071581 |
| mir-451a      | mir-199a-2-5p | -0.448519357 | 0.047310428 | -0.675869397 | 0.001071581 |
| mir-30c-1-5p  | cpeptide      | 0.042132937  | 0.860003818 | -0.287741408 | 0.218628016 |
| mir-30c-2-5p  | cpeptide      | 0.042132937  | 0.860003818 | -0.287741408 | 0.218628016 |
| mir-146b-5p   | mir-425-5p    | -0.400504342 | 0.080137317 | -0.086075688 | 0.718228958 |
| mir-192-5p    | mir-186-5p    | 0.809320878  | 1.55E-05    | 0.656899549  | 0.001651928 |

|               |               |              |             |              |             |
|---------------|---------------|--------------|-------------|--------------|-------------|
| let-7b-5p     | mir-185-5p    | 0.897826687  | 7.91E-08    | 0.808741933  | 1.59E-05    |
| mir-24-2-3p   | mir-151a-5p   | 0.243144537  | 0.301619629 | 0.526422045  | 0.017104185 |
| mir-151a-5p   | mir-24-1-3p   | 0.243144537  | 0.301619629 | 0.526422045  | 0.017104185 |
| mir-99a-5p    | mir-15b-5p    | -0.185964742 | 0.432457133 | 0.14778284   | 0.534087274 |
| let-7b-5p     | mir-128-1-3p  | -0.027912922 | 0.907006831 | -0.349520576 | 0.130898299 |
| let-7b-5p     | mir-128-2-3p  | -0.027912922 | 0.907006831 | -0.349520576 | 0.130898299 |
| mir-140-5p    | mir-15a-5p    | 0.279319781  | 0.2330087   | -0.049941194 | 0.834375912 |
| mir-3615      | mir-126-5p    | -6.13E-05    | 0.999795354 | -0.324704149 | 0.162470815 |
| mir-16-2-5p   | mir-486-2-5p  | 0.961538517  | 1.52E-11    | 0.925990001  | 4.83E-09    |
| mir-486-2-5p  | mir-16-1-5p   | 0.961538517  | 1.52E-11    | 0.925990001  | 4.83E-09    |
| mir-10b-5p    | mir-151a-3p   | 0.17356472   | 0.464285642 | -0.15969016  | 0.501260238 |
| mir-181a-2-5p | mir-106a-5p   | 0.028166136  | 0.906166784 | -0.298811154 | 0.200629971 |
| mir-106a-5p   | mir-181a-1-5p | 0.028166136  | 0.906166784 | -0.298811154 | 0.200629971 |
| mir-103a-2-3p | let-7d-5p     | 0.639199052  | 0.002411512 | 0.798029195  | 2.49E-05    |
| mir-103a-1-3p | let-7d-5p     | 0.639199052  | 0.002411512 | 0.798029195  | 2.49E-05    |
| mir-26b-5p    | mir-423-5p    | 0.756894042  | 0.000111969 | 0.573536874  | 0.008195451 |
| mir-30a-5p    | mir-15b-5p    | -0.317876806 | 0.172004624 | 0.0068255    | 0.977216102 |
| let-7f-2-5p   | mir-375       | -0.077675573 | 0.744802226 | 0.252650898  | 0.282512005 |
| mir-375       | let-7f-1-5p   | -0.077675573 | 0.744802226 | 0.252650898  | 0.282512005 |
| mir-22-3p     | mir-320a      | 0.803459984  | 1.99E-05    | 0.648293633  | 0.001991321 |
| mir-148a-3p   | mir-378a-3p   | 0.587948118  | 0.006402616 | 0.32637731   | 0.160191122 |
| mir-222-3p    | mir-101-1-3p  | 0.794429783  | 2.87E-05    | 0.889405291  | 1.56E-07    |
| mir-222-3p    | mir-101-2-3p  | 0.794429783  | 2.87E-05    | 0.889405291  | 1.56E-07    |
| mir-744-5p    | mir-126-5p    | 0.264661846  | 0.259469011 | 0.541879132  | 0.013588359 |
| mir-10b-5p    | mir-185-5p    | -0.120600528 | 0.6125273   | 0.211048561  | 0.37175787  |
| mir-7-3-5p    | mir-186-5p    | 0.88949236   | 1.55E-07    | 0.79470652   | 2.84E-05    |
| mir-7-1-5p    | mir-186-5p    | 0.88949236   | 1.55E-07    | 0.79470652   | 2.84E-05    |
| mir-186-5p    | mir-7-2-5p    | 0.88949236   | 1.55E-07    | 0.79470652   | 2.84E-05    |
| mir-140-5p    | let-7g-5p     | 0.710107384  | 0.000451769 | 0.840348459  | 3.53E-06    |
| mir-101-1-3p  | mir-194-2-5p  | 0.837443405  | 4.11E-06    | 0.705227497  | 0.00051463  |
| mir-101-1-3p  | mir-194-1-5p  | 0.837443405  | 4.11E-06    | 0.705227497  | 0.00051463  |
| mir-194-2-5p  | mir-101-2-3p  | 0.837443405  | 4.11E-06    | 0.705227497  | 0.00051463  |
| mir-194-1-5p  | mir-101-2-3p  | 0.837443405  | 4.11E-06    | 0.705227497  | 0.00051463  |
| mir-30d-5p    | mir-151a-3p   | 0.73494487   | 0.000223171 | 0.854960173  | 1.57E-06    |
| mir-29a-3p    | mir-101-1-3p  | 0.545186108  | 0.012917849 | 0.269992384  | 0.249635469 |
| mir-29a-3p    | mir-101-2-3p  | 0.545186108  | 0.012917849 | 0.269992384  | 0.249635469 |
| mir-222-3p    | mir-7-3-5p    | 0.742418437  | 0.000177802 | 0.859246484  | 1.22E-06    |
| mir-222-3p    | mir-7-1-5p    | 0.742418437  | 0.000177802 | 0.859246484  | 1.22E-06    |
| mir-222-3p    | mir-7-2-5p    | 0.742418437  | 0.000177802 | 0.859246484  | 1.22E-06    |
| mir-222-3p    | mir-27b-3p    | -0.107835898 | 0.650888553 | -0.415480188 | 0.068482648 |
| mir-126-3p    | mir-15a-5p    | -0.582778635 | 0.0070044   | -0.761853293 | 9.49E-05    |
| mir-26a-2-5p  | mir-24-2-3p   | 0.667948993  | 0.0012885   | 0.814718931  | 1.22E-05    |
| mir-26a-2-5p  | mir-24-1-3p   | 0.667948993  | 0.0012885   | 0.814718931  | 1.22E-05    |
| mir-24-2-3p   | mir-26a-1-5p  | 0.667948993  | 0.0012885   | 0.814718931  | 1.22E-05    |
| mir-24-1-3p   | mir-26a-1-5p  | 0.667948993  | 0.0012885   | 0.814718931  | 1.22E-05    |
| mir-7-3-5p    | mir-125b-1-5p | 0.387304406  | 0.091576795 | 0.074700975  | 0.754280894 |
| mir-7-3-5p    | mir-125b-2-5p | 0.387304406  | 0.091576795 | 0.074700975  | 0.754280894 |
| mir-7-1-5p    | mir-125b-1-5p | 0.387304406  | 0.091576795 | 0.074700975  | 0.754280894 |
| mir-7-1-5p    | mir-125b-2-5p | 0.387304406  | 0.091576795 | 0.074700975  | 0.754280894 |
| mir-125b-1-5p | mir-7-2-5p    | 0.387304406  | 0.091576795 | 0.074700975  | 0.754280894 |
| mir-7-2-5p    | mir-125b-2-5p | 0.387304406  | 0.091576795 | 0.074700975  | 0.754280894 |
| let-7b-5p     | mir-126-5p    | 0.045233774  | 0.849808811 | -0.280645014 | 0.230706109 |
| let-7i-5p     | mir-128-1-3p  | 0.673403934  | 0.001135524 | 0.817913515  | 1.06E-05    |
| let-7i-5p     | mir-128-2-3p  | 0.673403934  | 0.001135524 | 0.817913515  | 1.06E-05    |
| mir-106b-3p   | mir-28-5p     | -0.337486781 | 0.14561332  | -0.594553614 | 0.005696065 |
| mir-92a-2-3p  | mir-423-5p    | 0.266648097  | 0.255776638 | -0.060021294 | 0.801531203 |
| mir-423-5p    | mir-92a-1-3p  | 0.266648097  | 0.255776638 | -0.060021294 | 0.801531203 |
| mir-192-5p    | mir-125b-1-5p | 0.502482311  | 0.023950828 | 0.216361091  | 0.35955574  |
| mir-192-5p    | mir-125b-2-5p | 0.502482311  | 0.023950828 | 0.216361091  | 0.35955574  |
| mir-140-5p    | mir-378a-3p   | 0.19202569   | 0.417331592 | 0.483101546  | 0.030947683 |
| mir-92a-2-3p  | mir-15b-5p    | 0.069910294  | 0.769617409 | -0.256655316 | 0.27469314  |
| mir-92a-1-3p  | mir-15b-5p    | 0.069910294  | 0.769617409 | -0.256655316 | 0.27469314  |
| mir-107       | mir-30e-5p    | 0.871509954  | 5.64E-07    | 0.764542465  | 8.66E-05    |
| mir-486-2-5p  | mir-28-5p     | -0.178983916 | 0.450231403 | -0.472388533 | 0.035450155 |

|               |               |              |             |              |             |
|---------------|---------------|--------------|-------------|--------------|-------------|
| mir-7-3-5p    | mir-28-5p     | -0.151435448 | 0.523913122 | -0.450090657 | 0.046446701 |
| mir-7-1-5p    | mir-28-5p     | -0.151435448 | 0.523913122 | -0.450090657 | 0.046446701 |
| mir-7-2-5p    | mir-28-5p     | -0.151435448 | 0.523913122 | -0.450090657 | 0.046446701 |
| mir-629-5p    | mir-486-2-5p  | 0.905309988  | 4.10E-08    | 0.82386845   | 8.02E-06    |
| mir-375       | mir-28-3p     | 0.241991196  | 0.303989999 | -0.085054168 | 0.72144457  |
| mir-107       | mir-15b-5p    | 0.670075614  | 0.00122692  | 0.44522872   | 0.049159166 |
| mir-98-5p     | mir-185-5p    | 0.089142611  | 0.708602243 | -0.238090644 | 0.312089956 |
| mir-146a-5p   | mir-101-1-3p  | -0.314760721 | 0.176480484 | -0.576833998 | 0.007752904 |
| mir-146a-5p   | mir-101-2-3p  | -0.314760721 | 0.176480484 | -0.576833998 | 0.007752904 |
| mir-182-5p    | mir-20b-5p    | 0.749408319  | 0.00014276  | 0.862584257  | 9.97E-07    |
| mir-150-5p    | mir-99a-5p    | 0.747138608  | 0.000153424 | 0.561381717  | 0.01000867  |
| mir-10b-5p    | mir-7-3-5p    | -0.036526841 | 0.878488869 | 0.286471804  | 0.220757766 |
| mir-10b-5p    | mir-7-1-5p    | -0.036526841 | 0.878488869 | 0.286471804  | 0.220757766 |
| mir-10b-5p    | mir-7-2-5p    | -0.036526841 | 0.878488869 | 0.286471804  | 0.220757766 |
| mir-340-5p    | let-7b-5p     | -0.326585725 | 0.15990871  | -0.585127698 | 0.006725446 |
| mir-20a-5p    | mir-363-3p    | 0.89718503   | 8.35E-08    | 0.809811135  | 1.52E-05    |
| mir-106a-5p   | mir-1307-3p   | -0.618404945 | 0.003655926 | -0.783160967 | 4.44E-05    |
| mir-486-2-5p  | cpeptide      | -0.192298764 | 0.416656901 | 0.135439871  | 0.569126381 |
| mir-26a-2-5p  | mir-224-5p    | 0.409275031  | 0.07314622  | 0.644236838  | 0.002170474 |
| mir-224-5p    | mir-26a-1-5p  | 0.409275031  | 0.07314622  | 0.644236838  | 0.002170474 |
| mir-181b-2-5p | mir-584-5p    | -0.138303364 | 0.560908941 | 0.189054721  | 0.42470994  |
| mir-584-5p    | mir-181b-1-5p | -0.138303364 | 0.560908941 | 0.189054721  | 0.42470994  |
| mir-106a-5p   | mir-27a-3p    | 0.598580393  | 0.005297754 | 0.345584541  | 0.135590118 |
| let-7d-5p     | mir-148b-3p   | 0.271981276  | 0.246028268 | 0.543683884  | 0.013219044 |
| mir-29a-3p    | mir-125a-5p   | -0.108351278 | 0.649322378 | 0.21798028   | 0.355882974 |
| mir-150-5p    | mir-23a-3p    | 0.273486739  | 0.243320165 | -0.049411998 | 0.836108038 |
| mir-103a-2-3p | mir-99b-5p    | 0.34653684   | 0.134444241 | 0.598977434  | 0.005259756 |
| mir-103a-1-3p | mir-99b-5p    | 0.34653684   | 0.134444241 | 0.598977434  | 0.005259756 |
| mir-17-5p     | mir-28-3p     | 0.071147645  | 0.765648103 | -0.253067232 | 0.281692735 |
| mir-107       | mir-484       | 0.789251335  | 3.52E-05    | 0.628986117  | 0.002969091 |
| mir-186-5p    | cpeptide      | -0.209595076 | 0.375136695 | 0.116017594  | 0.626195521 |
| mir-22-3p     | mir-17-5p     | 0.936650403  | 1.24E-09    | 0.88121766   | 2.88E-07    |
| mir-22-3p     | mir-26a-2-5p  | -0.208328678 | 0.378094692 | 0.116597766  | 0.624458583 |
| mir-22-3p     | mir-26a-1-5p  | -0.208328678 | 0.378094692 | 0.116597766  | 0.624458583 |
| mir-423-5p    | mir-93-5p     | 0.824289646  | 7.86E-06    | 0.68661155   | 0.000827195 |
| mir-139-5p    | norepi        | 0.267940239  | 0.253392593 | 0.539139782  | 0.014164777 |
| mir-181a-2-5p | mir-451a      | 0.036219447  | 0.879504284 | -0.283727109 | 0.225408282 |
| mir-451a      | mir-181a-1-5p | 0.036219447  | 0.879504284 | -0.283727109 | 0.225408282 |
| mir-126-3p    | mir-363-3p    | -0.221707794 | 0.347510543 | -0.502788445 | 0.023851359 |
| mir-15a-5p    | let-7d-3p     | -0.629185774 | 0.002957245 | -0.788568181 | 3.62E-05    |
| mir-20a-5p    | cpeptide      | -0.193946473 | 0.412598371 | 0.13002031   | 0.584821004 |
| mir-21-5p     | mir-425-5p    | -0.219175319 | 0.353186218 | 0.1038338    | 0.663097984 |
| mir-151a-5p   | mir-378a-3p   | -0.527782525 | 0.016768196 | -0.254550885 | 0.278785159 |
| let-7f-2-5p   | mir-486-2-5p  | -0.342485783 | 0.139366426 | -0.593843791 | 0.005768767 |
| mir-486-2-5p  | let-7f-1-5p   | -0.342485783 | 0.139366426 | -0.593843791 | 0.005768767 |
| mir-22-3p     | mir-151a-5p   | -0.012527239 | 0.958195678 | 0.304103722  | 0.192384788 |
| mir-30a-5p    | mir-10a-5p    | 0.499708931  | 0.024866992 | 0.704086081  | 0.000530359 |
| mir-144-3p    | mir-126-5p    | 0.24454456   | 0.298757428 | -0.076684788 | 0.747955552 |
| mir-224-5p    | mir-629-5p    | -0.079893856 | 0.737756424 | -0.385228668 | 0.093479339 |
| mir-26a-2-5p  | mir-143-3p    | 0.064342072  | 0.787546779 | 0.371815919  | 0.106476893 |
| mir-143-3p    | mir-26a-1-5p  | 0.064342072  | 0.787546779 | 0.371815919  | 0.106476893 |
| mir-106a-5p   | mir-15b-5p    | 0.473569291  | 0.034930271 | 0.186569842  | 0.430934171 |
| mir-128-1-3p  | mir-30c-1-5p  | 0.57938676   | 0.007423851 | 0.756161596  | 0.000114705 |
| mir-128-1-3p  | mir-30c-2-5p  | 0.57938676   | 0.007423851 | 0.756161596  | 0.000114705 |
| mir-30c-1-5p  | mir-128-2-3p  | 0.57938676   | 0.007423851 | 0.756161596  | 0.000114705 |
| mir-128-2-3p  | mir-30c-2-5p  | 0.57938676   | 0.007423851 | 0.756161596  | 0.000114705 |
| mir-146b-5p   | mir-144-3p    | -0.521436811 | 0.018381698 | -0.718181019 | 0.000362089 |
| mir-375       | mir-185-5p    | -0.140984502 | 0.553262764 | 0.181270163  | 0.444369043 |
| mir-1307-3p   | mir-30d-5p    | 0.107623613  | 0.651534073 | 0.408012462  | 0.074123472 |
| let-7f-2-5p   | mir-28-5p     | 0.710697279  | 0.000444632 | 0.8377002    | 4.05E-06    |
| let-7f-1-5p   | mir-28-5p     | 0.710697279  | 0.000444632 | 0.8377002    | 4.05E-06    |
| mir-320a      | mir-126-5p    | 0.320530099  | 0.168255178 | 0.007852508  | 0.973788946 |
| mir-532-5p    | mir-151a-3p   | -0.307033796 | 0.187919398 | -0.566010208 | 0.009283284 |
| mir-361-5p    | mir-423-3p    | 0.592763015  | 0.005880927 | 0.764158577  | 8.77E-05    |



|               |               |              |             |              |             |
|---------------|---------------|--------------|-------------|--------------|-------------|
| mir-27b-3p    | mir-144-3p    | -0.258537233 | 0.271065711 | -0.52890514  | 0.01649495  |
| mir-361-5p    | mir-126-5p    | 0.421416867  | 0.06423323  | 0.648829487  | 0.00196861  |
| mir-532-5p    | mir-28-3p     | -0.446877504 | 0.048226057 | -0.666229673 | 0.001340167 |
| mir-181a-2-5p | let-7b-5p     | 0.007730433  | 0.974196289 | -0.305115133 | 0.190835437 |
| let-7b-5p     | mir-181a-1-5p | 0.007730433  | 0.974196289 | -0.305115133 | 0.190835437 |
| mir-126-3p    | mir-15b-5p    | 0.17211257   | 0.46808917  | 0.459449527  | 0.041550627 |
| mir-107       | mir-126-5p    | 0.33629439   | 0.147131821 | 0.027174607  | 0.90945675  |
| mir-3615      | mir-99b-5p    | -0.652127212 | 0.001833563 | -0.427065904 | 0.060377224 |
| mir-3615      | mir-423-3p    | -0.532353107 | 0.015677952 | -0.724031576 | 0.000307007 |
| mir-224-5p    | let-7g-5p     | -0.016969729 | 0.943390541 | 0.296484904  | 0.204327385 |
| mir-150-5p    | mir-28-5p     | 0.237917766  | 0.312451936 | -0.079861215 | 0.737859953 |
| mir-744-5p    | mir-20b-5p    | -0.481782281 | 0.031476586 | -0.689965697 | 0.000761309 |
| mir-25-3p     | mir-106b-3p   | 0.955224468  | 5.84E-11    | 0.916353478  | 1.40E-08    |
| mir-29a-3p    | let-7d-3p     | 0.001987386  | 0.993365239 | 0.313537446  | 0.178259037 |
| mir-223-3p    | mir-30d-5p    | 0.612517558  | 0.004091925 | 0.776035995  | 5.78E-05    |
| mir-7-3-5p    | mir-374b-5p   | 0.048188679  | 0.840114887 | -0.267487587 | 0.254226137 |
| mir-7-1-5p    | mir-374b-5p   | 0.048188679  | 0.840114887 | -0.267487587 | 0.254226137 |
| mir-374b-5p   | mir-7-2-5p    | 0.048188679  | 0.840114887 | -0.267487587 | 0.254226137 |
| let-7a-3-5p   | mir-28-5p     | 0.75789051   | 0.000108336 | 0.865104564  | 8.52E-07    |
| let-7a-2-5p   | mir-28-5p     | 0.75789051   | 0.000108336 | 0.865104564  | 8.52E-07    |
| let-7a-1-5p   | mir-28-5p     | 0.75789051   | 0.000108336 | 0.865104564  | 8.52E-07    |
| let-7d-3p     | mir-20b-5p    | -0.272494155 | 0.245103517 | -0.538152817 | 0.014377215 |
| mir-22-3p     | mir-106a-5p   | 0.730082454  | 0.000257721 | 0.541990621  | 0.013565306 |
| let-7b-5p     | mir-375       | -0.203835013 | 0.38869616  | 0.114602959  | 0.630438636 |
| mir-584-5p    | mir-25-3p     | -0.284514476 | 0.224067712 | -0.54723271  | 0.012516447 |
| mir-194-2-5p  | mir-186-5p    | 0.771673776  | 6.75E-05    | 0.606189396  | 0.004607678 |
| mir-194-1-5p  | mir-186-5p    | 0.771673776  | 6.75E-05    | 0.606189396  | 0.004607678 |
| mir-181a-2-5p | mir-148b-3p   | 0.46126204   | 0.040650381 | 0.675284069  | 0.00108648  |
| mir-148b-3p   | mir-181a-1-5p | 0.46126204   | 0.040650381 | 0.675284069  | 0.00108648  |
| mir-3615      | mir-199a-2-3p | -0.474475855 | 0.034535162 | -0.684305317 | 0.000875241 |
| mir-3615      | mir-199a-1-3p | -0.474475855 | 0.034535162 | -0.684305317 | 0.000875241 |
| mir-3615      | mir-199b-3p   | -0.474475855 | 0.034535162 | -0.684305317 | 0.000875241 |
| mir-126-3p    | mir-425-5p    | -0.055952511 | 0.814753451 | 0.259199901  | 0.269795578 |
| mir-486-2-5p  | mir-375       | -0.091112654 | 0.702440767 | 0.225740276  | 0.338583333 |
| mir-1307-3p   | mir-139-5p    | 0.357417671  | 0.121833954 | 0.601138446  | 0.005056856 |
| mir-106a-5p   | mir-28-5p     | -0.209782479 | 0.37470008  | -0.488237918 | 0.028954477 |
| mir-224-5p    | mir-23a-3p    | 0.470113281  | 0.036468919 | 0.680883787  | 0.000950852 |
| mir-10a-5p    | copeptin      | 0.037756213  | 0.874429727 | -0.275249062 | 0.240174419 |
| mir-146a-5p   | mir-148b-3p   | 0.226677946  | 0.336526957 | 0.501037097  | 0.024424848 |
| mir-378a-3p   | mir-30a-5p    | 0.102887325  | 0.665997589 | 0.39966552   | 0.080831016 |
| mir-3615      | mir-125b-1-5p | 0.408231686  | 0.073953093 | 0.113067412  | 0.635057058 |
| mir-3615      | mir-125b-2-5p | 0.408231686  | 0.073953093 | 0.113067412  | 0.635057058 |
| let-7i-5p     | mir-101-1-3p  | 0.492148247  | 0.027505816 | 0.215539387  | 0.361427879 |
| let-7i-5p     | mir-101-2-3p  | 0.492148247  | 0.027505816 | 0.215539387  | 0.361427879 |
| mir-340-5p    | mir-744-5p    | 0.858943819  | 1.24E-06    | 0.748561791  | 0.000146661 |
| mir-192-5p    | mir-28-3p     | -0.174970776 | 0.460617882 | -0.459290779 | 0.041630203 |
| mir-140-5p    | mir-125b-1-5p | 0.062447103  | 0.793672504 | 0.364230021  | 0.114382496 |
| mir-140-5p    | mir-125b-2-5p | 0.062447103  | 0.793672504 | 0.364230021  | 0.114382496 |
| mir-361-5p    | mir-181b-2-5p | -0.279179502 | 0.233253303 | 0.032378601  | 0.89220653  |
| mir-361-5p    | mir-181b-1-5p | -0.279179502 | 0.233253303 | 0.032378601  | 0.89220653  |
| mir-629-5p    | mir-106b-3p   | 0.929935372  | 2.99E-09    | 0.871382584  | 5.68E-07    |
| mir-101-1-3p  | mir-125b-1-5p | 0.337144805  | 0.146047699 | 0.031865469  | 0.893905515 |
| mir-101-1-3p  | mir-125b-2-5p | 0.337144805  | 0.146047699 | 0.031865469  | 0.893905515 |
| mir-125b-1-5p | mir-101-2-3p  | 0.337144805  | 0.146047699 | 0.031865469  | 0.893905515 |
| mir-101-2-3p  | mir-125b-2-5p | 0.337144805  | 0.146047699 | 0.031865469  | 0.893905515 |
| mir-222-3p    | mir-103a-2-3p | 0.268556032  | 0.252261426 | -0.043594392 | 0.855196053 |
| mir-222-3p    | mir-103a-1-3p | 0.268556032  | 0.252261426 | -0.043594392 | 0.855196053 |
| mir-106a-5p   | mir-30e-5p    | 0.747180225  | 0.000153222 | 0.570092895  | 0.008679513 |
| mir-374b-5p   | mir-28-3p     | 0.363011872  | 0.115690246 | 0.603857641  | 0.004810759 |
| mir-361-5p    | mir-106b-3p   | -0.602066821 | 0.004971694 | -0.767881654 | 7.72E-05    |
| mir-106b-3p   | mir-93-5p     | 0.862784391  | 9.85E-07    | 0.755472964  | 0.00011733  |
| mir-26a-2-5p  | mir-151a-5p   | 0.59524672   | 0.005625804 | 0.763386846  | 9.01E-05    |
| mir-151a-5p   | mir-26a-1-5p  | 0.59524672   | 0.005625804 | 0.763386846  | 9.01E-05    |
| mir-320a      | mir-99a-5p    | 0.288924972  | 0.216654782 | -0.021099437 | 0.929643697 |

|               |               |              |             |              |             |
|---------------|---------------|--------------|-------------|--------------|-------------|
| mir-103a-2-3p | mir-186-5p    | 0.334041888  | 0.150030476 | 0.029161481  | 0.902865636 |
| mir-103a-1-3p | mir-186-5p    | 0.334041888  | 0.150030476 | 0.029161481  | 0.902865636 |
| mir-16-2-5p   | mir-484       | 0.785041953  | 4.14E-05    | 0.629480613  | 0.002939823 |
| mir-16-1-5p   | mir-484       | 0.785041953  | 4.14E-05    | 0.629480613  | 0.002939823 |
| mir-92a-2-3p  | mir-378a-3p   | 0.42070673   | 0.064730797 | 0.13013897   | 0.584475414 |
| mir-378a-3p   | mir-92a-1-3p  | 0.42070673   | 0.064730797 | 0.13013897   | 0.584475414 |
| mir-19b-2-3p  | mir-222-3p    | 0.80326427   | 2.00E-05    | 0.890719995  | 1.41E-07    |
| mir-222-3p    | mir-19b-1-3p  | 0.80326427   | 2.00E-05    | 0.890719995  | 1.41E-07    |
| mir-27a-3p    | mir-20b-5p    | 0.581525805  | 0.007157008 | 0.333925789  | 0.150180949 |
| mir-106a-5p   | mir-423-3p    | -0.456640568 | 0.042976149 | -0.669910165 | 0.001231621 |
| mir-543       | mir-30a-5p    | 0.357230143  | 0.122043856 | 0.056215984  | 0.813895747 |
| mir-106a-5p   | mir-374b-5p   | -0.074947345 | 0.753494521 | -0.373335357 | 0.104942231 |
| mir-26a-2-5p  | mir-128-1-3p  | 0.738067414  | 0.000203139 | 0.851982295  | 1.87E-06    |
| mir-26a-2-5p  | mir-128-2-3p  | 0.738067414  | 0.000203139 | 0.851982295  | 1.87E-06    |
| mir-128-1-3p  | mir-26a-1-5p  | 0.738067414  | 0.000203139 | 0.851982295  | 1.87E-06    |
| mir-128-2-3p  | mir-26a-1-5p  | 0.738067414  | 0.000203139 | 0.851982295  | 1.87E-06    |
| mir-199a-2-3p | mir-375       | -0.073627813 | 0.757708964 | 0.238654655  | 0.31091076  |
| mir-199a-1-3p | mir-375       | -0.073627813 | 0.757708964 | 0.238654655  | 0.31091076  |
| mir-375       | mir-199b-3p   | -0.073627813 | 0.757708964 | 0.238654655  | 0.31091076  |
| mir-146a-5p   | mir-143-3p    | -0.065017412 | 0.785366537 | 0.246696358  | 0.294390721 |
| mir-191-5p    | let-7b-5p     | -0.275378797 | 0.239943882 | -0.536800702 | 0.014672405 |
| mir-222-3p    | mir-148a-3p   | 0.203607868  | 0.389236392 | -0.10981057  | 0.644895464 |
| mir-106a-5p   | mir-21-5p     | -0.38185237  | 0.096635543 | -0.616067937 | 0.003824139 |
| mir-26a-2-5p  | mir-92a-2-3p  | -0.638931679 | 0.002424905 | -0.790438645 | 3.36E-05    |
| mir-26a-2-5p  | mir-92a-1-3p  | -0.638931679 | 0.002424905 | -0.790438645 | 3.36E-05    |
| mir-92a-2-3p  | mir-26a-1-5p  | -0.638931679 | 0.002424905 | -0.790438645 | 3.36E-05    |
| mir-26a-1-5p  | mir-92a-1-3p  | -0.638931679 | 0.002424905 | -0.790438645 | 3.36E-05    |
| mir-17-5p     | mir-106a-5p   | 0.750965135  | 0.00013582  | 0.577676575  | 0.007643003 |
| mir-16-2-5p   | mir-146a-5p   | -0.359648793 | 0.119356371 | -0.599661891 | 0.005194778 |
| mir-146a-5p   | mir-16-1-5p   | -0.359648793 | 0.119356371 | -0.599661891 | 0.005194778 |
| mir-22-3p     | mir-140-5p    | 0.690060915  | 0.000759505 | 0.8224031    | 8.59E-06    |
| mir-181a-2-5p | mir-744-5p    | 0.516721033  | 0.019659227 | 0.710344618  | 0.000448887 |
| mir-744-5p    | mir-181a-1-5p | 0.516721033  | 0.019659227 | 0.710344618  | 0.000448887 |
| mir-423-3p    | mir-15b-5p    | 0.055684129  | 0.815627346 | 0.355132224  | 0.124409715 |
| mir-21-5p     | let-7a-3-5p   | 0.930351788  | 2.84E-09    | 0.873022589  | 5.09E-07    |
| mir-21-5p     | let-7a-2-5p   | 0.930351788  | 2.84E-09    | 0.873022589  | 5.09E-07    |
| mir-21-5p     | let-7a-1-5p   | 0.930351788  | 2.84E-09    | 0.873022589  | 5.09E-07    |
| mir-22-3p     | mir-128-1-3p  | 0.084851837  | 0.722082017 | 0.380276365  | 0.098135164 |
| mir-22-3p     | mir-128-2-3p  | 0.084851837  | 0.722082017 | 0.380276365  | 0.098135164 |
| let-7b-5p     | let-7d-5p     | -0.393578659 | 0.085998843 | -0.623826724 | 0.003289183 |
| mir-139-5p    | mir-221-3p    | 0.75501251   | 0.000119113 | 0.861623269  | 1.06E-06    |
| mir-192-5p    | mir-194-2-5p  | 0.895769625  | 9.39E-08    | 0.943109121  | 4.82E-10    |
| mir-192-5p    | mir-194-1-5p  | 0.895769625  | 9.39E-08    | 0.943109121  | 4.82E-10    |
| mir-30d-5p    | mir-486-2-5p  | 0.039244416  | 0.869520024 | -0.268995947 | 0.251455306 |
| mir-181b-2-5p | mir-151a-5p   | -0.082361112 | 0.729943431 | 0.228349692  | 0.332878961 |
| mir-181b-1-5p | mir-151a-5p   | -0.082361112 | 0.729943431 | 0.228349692  | 0.332878961 |
| mir-29a-3p    | norepi        | -0.130905931 | 0.582243791 | 0.181047787  | 0.444937501 |
| mir-15a-5p    | mir-185-5p    | 0.7530992    | 0.000126777 | 0.582168262  | 0.007078413 |
| mir-106a-5p   | mir-221-3p    | -0.459919915 | 0.041315527 | -0.670327332 | 0.001219798 |
| mir-92a-2-3p  | let-7d-3p     | -0.73929959  | 0.000195668 | -0.851880997 | 1.88E-06    |
| let-7d-3p     | mir-92a-1-3p  | -0.73929959  | 0.000195668 | -0.851880997 | 1.88E-06    |
| mir-126-3p    | mir-24-2-3p   | 0.880916234  | 2.95E-07    | 0.934625407  | 1.63E-09    |
| mir-126-3p    | mir-24-1-3p   | 0.880916234  | 2.95E-07    | 0.934625407  | 1.63E-09    |
| mir-223-3p    | mir-15a-5p    | -0.34590536  | 0.135203317 | -0.5880663   | 0.006389372 |
| mir-26a-2-5p  | mir-378a-3p   | -0.479388639 | 0.03245426  | -0.20565489  | 0.384382941 |
| mir-378a-3p   | mir-26a-1-5p  | -0.479388639 | 0.03245426  | -0.20565489  | 0.384382941 |
| mir-191-5p    | mir-27a-3p    | -0.002139371 | 0.992857859 | 0.301229384  | 0.196833933 |
| mir-103a-2-3p | mir-20a-5p    | 0.412186008  | 0.070929781 | 0.124731129  | 0.600312643 |
| mir-103a-1-3p | mir-20a-5p    | 0.412186008  | 0.070929781 | 0.124731129  | 0.600312643 |
| mir-22-3p     | norepi        | 0.134319324  | 0.572356274 | -0.175738128 | 0.458622474 |
| mir-584-5p    | let-7b-5p     | -0.330395625 | 0.154806612 | -0.575677045 | 0.007905911 |
| mir-93-5p     | mir-15b-5p    | 0.70782194   | 0.000480344 | 0.515443666  | 0.020017175 |
| mir-98-5p     | mir-199a-2-3p | 0.820754189  | 9.28E-06    | 0.899904978  | 6.63E-08    |
| mir-98-5p     | mir-199a-1-3p | 0.820754189  | 9.28E-06    | 0.899904978  | 6.63E-08    |

|               |               |              |             |              |             |
|---------------|---------------|--------------|-------------|--------------|-------------|
| mir-98-5p     | mir-199b-3p   | 0.820754189  | 9.28E-06    | 0.899904978  | 6.63E-08    |
| mir-140-5p    | mir-425-5p    | 0.679648992  | 0.00097946  | 0.814713363  | 1.22E-05    |
| mir-101-1-3p  | mir-148a-3p   | 0.353157755  | 0.12666035  | 0.05673498   | 0.812206813 |
| mir-148a-3p   | mir-101-2-3p  | 0.353157755  | 0.12666035  | 0.05673498   | 0.812206813 |
| mir-532-5p    | mir-744-5p    | -0.718563155 | 0.000358251 | -0.838691565 | 3.85E-06    |
| mir-185-5p    | copeptin      | 0.078437718  | 0.742379238 | -0.229257132 | 0.3309086   |
| mir-10b-5p    | let-7g-5p     | -0.215354551 | 0.361849772 | 0.092931226  | 0.696768834 |
| mir-101-1-3p  | mir-185-5p    | 0.955497461  | 5.53E-11    | 0.918523669  | 1.11E-08    |
| mir-101-2-3p  | mir-185-5p    | 0.955497461  | 5.53E-11    | 0.918523669  | 1.11E-08    |
| mir-181a-2-5p | mir-93-5p     | 0.250731946  | 0.286307212 | -0.055505393 | 0.816209455 |
| mir-93-5p     | mir-181a-1-5p | 0.250731946  | 0.286307212 | -0.055505393 | 0.816209455 |
| mir-92a-2-3p  | mir-28-3p     | -0.4787041   | 0.032738178 | -0.682102424 | 0.000923314 |
| mir-28-3p     | mir-92a-1-3p  | -0.4787041   | 0.032738178 | -0.682102424 | 0.000923314 |
| mir-21-5p     | mir-224-5p    | 0.470842055  | 0.036140156 | 0.676600985  | 0.001053201 |
| mir-146a-5p   | let-7a-3-5p   | 0.881852262  | 2.75E-07    | 0.934863707  | 1.58E-09    |
| mir-146a-5p   | let-7a-2-5p   | 0.881852262  | 2.75E-07    | 0.934863707  | 1.58E-09    |
| mir-146a-5p   | let-7a-1-5p   | 0.881852262  | 2.75E-07    | 0.934863707  | 1.58E-09    |
| mir-1307-3p   | mir-451a      | -0.671833303 | 0.001177912 | -0.809530038 | 1.53E-05    |
| mir-19b-2-3p  | mir-486-2-5p  | 0.882259072  | 2.67E-07    | 0.791120581  | 3.27E-05    |
| mir-19b-1-3p  | mir-486-2-5p  | 0.882259072  | 2.67E-07    | 0.791120581  | 3.27E-05    |
| mir-340-5p    | mir-25-3p     | -0.213891816 | 0.365198423 | -0.484040921 | 0.030575344 |
| mir-30c-1-5p  | mir-543       | 0.535690415  | 0.014918428 | 0.279543065  | 0.232619706 |
| mir-543       | mir-30c-2-5p  | 0.535690415  | 0.014918428 | 0.279543065  | 0.232619706 |
| mir-146a-5p   | mir-532-5p    | -0.598116032 | 0.005342481 | -0.762058697 | 9.42E-05    |
| mir-10b-5p    | mir-30e-5p    | -0.257042225 | 0.273944905 | 0.047847301  | 0.841233716 |
| mir-146b-5p   | mir-27a-3p    | -0.141832854 | 0.550853165 | 0.16642727   | 0.483130735 |
| mir-150-5p    | mir-28-3p     | -0.086364314 | 0.717321224 | -0.377689408 | 0.100633434 |
| mir-106a-5p   | mir-7-3-5p    | 0.875719375  | 4.24E-07    | 0.93126471   | 2.53E-09    |
| mir-106a-5p   | mir-7-1-5p    | 0.875719375  | 4.24E-07    | 0.93126471   | 2.53E-09    |
| mir-106a-5p   | mir-7-2-5p    | 0.875719375  | 4.24E-07    | 0.93126471   | 2.53E-09    |
| let-7b-5p     | mir-20b-5p    | 0.882041464  | 2.72E-07    | 0.934842946  | 1.58E-09    |
| mir-340-5p    | mir-199a-2-3p | 0.907922125  | 3.22E-08    | 0.835186859  | 4.61E-06    |
| mir-340-5p    | mir-199a-1-3p | 0.907922125  | 3.22E-08    | 0.835186859  | 4.61E-06    |
| mir-340-5p    | mir-199b-3p   | 0.907922125  | 3.22E-08    | 0.835186859  | 4.61E-06    |
| mir-361-5p    | let-7a-3-5p   | 0.764219516  | 8.75E-05    | 0.865979958  | 8.06E-07    |
| mir-361-5p    | let-7a-2-5p   | 0.764219516  | 8.75E-05    | 0.865979958  | 8.06E-07    |
| mir-361-5p    | let-7a-1-5p   | 0.764219516  | 8.75E-05    | 0.865979958  | 8.06E-07    |
| mir-181a-2-5p | let-7d-3p     | 0.624903598  | 0.00322011  | 0.779073575  | 5.17E-05    |
| let-7d-3p     | mir-181a-1-5p | 0.624903598  | 0.00322011  | 0.779073575  | 5.17E-05    |
| mir-378a-3p   | norepi        | -0.056647145 | 0.812492592 | -0.351101724 | 0.129046325 |
| mir-181b-2-5p | mir-144-3p    | 0.537737128  | 0.014467454 | 0.283065075  | 0.226539503 |
| mir-144-3p    | mir-181b-1-5p | 0.537737128  | 0.014467454 | 0.283065075  | 0.226539503 |
| mir-27a-3p    | mir-363-3p    | 0.610344208  | 0.004263373 | 0.379558173  | 0.098824149 |
| mir-192-5p    | mir-150-5p    | 0.293917665  | 0.208460082 | 0.545979259  | 0.012761073 |
| mir-28-3p     | copeptin      | -0.289535595 | 0.215641346 | 0.011706826  | 0.960931386 |
| mir-451a      | let-7d-5p     | -0.378376158 | 0.099965763 | -0.609335264 | 0.00434496  |
| mir-181b-2-5p | mir-3615      | 0.307226967  | 0.187627486 | 0.007899616  | 0.973631754 |
| mir-3615      | mir-181b-1-5p | 0.307226967  | 0.187627486 | 0.007899616  | 0.973631754 |
| mir-107       | mir-99b-5p    | -0.580298106 | 0.007309184 | -0.33940695  | 0.143191093 |
| let-7g-5p     | mir-28-3p     | 0.327262863  | 0.158993534 | 0.030413101  | 0.898716712 |
| mir-148a-3p   | copeptin      | -0.177125327 | 0.4550265   | 0.129559138  | 0.586164958 |
| mir-128-1-3p  | mir-363-3p    | 0.060705279  | 0.79931346  | -0.243409683 | 0.30107629  |
| mir-128-2-3p  | mir-363-3p    | 0.060705279  | 0.79931346  | -0.243409683 | 0.30107629  |
| mir-3615      | mir-10b-5p    | -0.009777067 | 0.967367868 | 0.290558061  | 0.213951381 |
| mir-27b-3p    | mir-93-5p     | -0.327342756 | 0.158885795 | -0.570855281 | 0.008570398 |
| mir-125b-1-5p | mir-374b-5p   | -0.08436693  | 0.723610445 | 0.220423844  | 0.350381417 |
| mir-374b-5p   | mir-125b-2-5p | -0.08436693  | 0.723610445 | 0.220423844  | 0.350381417 |
| mir-19b-2-3p  | mir-99a-5p    | 0.221877479  | 0.347132157 | -0.082571658 | 0.729277873 |
| mir-19b-1-3p  | mir-99a-5p    | 0.221877479  | 0.347132157 | -0.082571658 | 0.729277873 |
| mir-181b-2-5p | mir-93-5p     | 0.545543834  | 0.012846949 | 0.294640725  | 0.207290558 |
| mir-181b-1-5p | mir-93-5p     | 0.545543834  | 0.012846949 | 0.294640725  | 0.207290558 |
| mir-27b-3p    | mir-532-5p    | -0.475651319 | 0.034028057 | -0.678149051 | 0.001015184 |
| mir-192-5p    | mir-99a-5p    | 0.57862605   | 0.007520689 | 0.338242163  | 0.144657038 |
| mir-21-5p     | mir-30a-5p    | 0.06397023   | 0.78874787  | 0.356012223  | 0.123413381 |

|               |               |              |             |              |             |
|---------------|---------------|--------------|-------------|--------------|-------------|
| mir-126-3p    | mir-486-2-5p  | -0.273945912 | 0.242498005 | -0.529424253 | 0.01636981  |
| mir-92a-2-3p  | mir-27a-3p    | 0.071290355  | 0.765190664 | -0.232299924 | 0.324352137 |
| mir-27a-3p    | mir-92a-1-3p  | 0.071290355  | 0.765190664 | -0.232299924 | 0.324352137 |
| mir-22-3p     | mir-126-3p    | -0.152600184 | 0.520688031 | 0.152968795  | 0.519669318 |
| mir-199a-1-5p | mir-744-5p    | 0.837039631  | 4.19E-06    | 0.717990654  | 0.000364014 |
| mir-744-5p    | mir-199a-2-5p | 0.837039631  | 4.19E-06    | 0.717990654  | 0.000364014 |
| mir-23a-3p    | mir-99a-5p    | 0.26839654   | 0.252554092 | 0.524658391  | 0.017547744 |
| let-7i-5p     | norepi        | 0.533880354  | 0.015326611 | 0.280333863  | 0.231245402 |
| mir-181b-2-5p | mir-146b-5p   | -0.373231451 | 0.105046665 | -0.084630035 | 0.722781011 |
| mir-146b-5p   | mir-181b-1-5p | -0.373231451 | 0.105046665 | -0.084630035 | 0.722781011 |
| mir-7-3-5p    | mir-223-3p    | -0.188829725 | 0.425271533 | -0.460805144 | 0.040875877 |
| mir-223-3p    | mir-7-1-5p    | -0.188829725 | 0.425271533 | -0.460805144 | 0.040875877 |
| mir-223-3p    | mir-7-2-5p    | -0.188829725 | 0.425271533 | -0.460805144 | 0.040875877 |
| mir-98-5p     | mir-423-5p    | 0.366604465  | 0.111864002 | 0.077140176  | 0.746505729 |
| mir-148b-3p   | mir-150-5p    | -0.169588548 | 0.474737519 | -0.444975278 | 0.049303817 |
| mir-146b-5p   | mir-21-5p     | 0.862292996  | 1.01E-06    | 0.923058833  | 6.77E-09    |
| mir-29a-3p    | let-7i-5p     | 0.028161887  | 0.90618088  | 0.323167655  | 0.164583903 |
| mir-92a-2-3p  | mir-140-5p    | 0.011688259  | 0.960993304 | -0.286715821 | 0.22034738  |
| mir-140-5p    | mir-92a-1-3p  | 0.011688259  | 0.960993304 | -0.286715821 | 0.22034738  |
| mir-425-5p    | mir-185-5p    | 0.834635163  | 4.74E-06    | 0.714780744  | 0.00039781  |
| mir-584-5p    | mir-148b-3p   | 0.194169351  | 0.412051043 | 0.464436506  | 0.039110118 |
| mir-99b-5p    | mir-27a-3p    | -0.068449845 | 0.77430949  | 0.233139728  | 0.322556277 |
| mir-181b-2-5p | mir-28-3p     | -0.323630995 | 0.163944707 | -0.029642616 | 0.901270455 |
| mir-181b-1-5p | mir-28-3p     | -0.323630995 | 0.163944707 | -0.029642616 | 0.901270455 |
| mir-21-5p     | mir-451a      | -0.382188854 | 0.096317548 | -0.609758682 | 0.004310565 |
| mir-144-3p    | mir-23a-3p    | -0.335932019 | 0.147595482 | -0.575103001 | 0.007982739 |
| mir-222-3p    | mir-363-3p    | 0.710170551  | 0.000451    | 0.831524105  | 5.54E-06    |
| mir-451a      | mir-374b-5p   | -0.054037913 | 0.820992238 | -0.344843387 | 0.136486684 |
| mir-224-5p    | mir-20b-5p    | 0.124870831  | 0.599901295 | -0.177964642 | 0.452857849 |
| mir-423-5p    | norepi        | 0.508558514  | 0.022036949 | 0.249970358  | 0.287822122 |
| let-7f-2-5p   | mir-144-3p    | -0.286968696 | 0.219922622 | -0.537285964 | 0.014565909 |
| mir-144-3p    | let-7f-1-5p   | -0.286968696 | 0.219922622 | -0.537285964 | 0.014565909 |
| mir-223-3p    | mir-150-5p    | 0.097934514  | 0.681244635 | -0.203680375 | 0.389063898 |
| mir-181a-2-5p | mir-378a-3p   | -0.250254124 | 0.287257094 | 0.048729468  | 0.83834312  |
| mir-378a-3p   | mir-181a-1-5p | -0.250254124 | 0.287257094 | 0.048729468  | 0.83834312  |
| mir-20a-5p    | mir-185-5p    | 0.974461958  | 4.00E-13    | 0.953551424  | 8.07E-11    |
| mir-99a-5p    | mir-20b-5p    | 0.208670004  | 0.37729615  | -0.092082595 | 0.699413719 |
| mir-103a-2-3p | let-7a-3-5p   | 0.723002972  | 0.000316137 | 0.839014081  | 3.79E-06    |
| mir-103a-2-3p | let-7a-2-5p   | 0.723002972  | 0.000316137 | 0.839014081  | 3.79E-06    |
| mir-103a-2-3p | let-7a-1-5p   | 0.723002972  | 0.000316137 | 0.839014081  | 3.79E-06    |
| let-7a-3-5p   | mir-103a-1-3p | 0.723002972  | 0.000316137 | 0.839014081  | 3.79E-06    |
| let-7a-2-5p   | mir-103a-1-3p | 0.723002972  | 0.000316137 | 0.839014081  | 3.79E-06    |
| mir-103a-1-3p | let-7a-1-5p   | 0.723002972  | 0.000316137 | 0.839014081  | 3.79E-06    |
| mir-17-5p     | norepi        | 0.224187006  | 0.342005936 | -0.075679596 | 0.751158673 |
| mir-629-5p    | mir-148a-3p   | 0.111166427  | 0.640792609 | -0.189846269 | 0.422737372 |
| mir-126-3p    | mir-144-3p    | -0.202178164 | 0.392646297 | -0.468926427 | 0.037009304 |
| mir-425-5p    | mir-99b-5p    | -0.410226664 | 0.072416024 | -0.131474134 | 0.58059284  |
| mir-22-3p     | mir-194-2-5p  | 0.763419576  | 9.00E-05    | 0.604830978  | 0.004725108 |
| mir-22-3p     | mir-194-1-5p  | 0.763419576  | 9.00E-05    | 0.604830978  | 0.004725108 |
| mir-3615      | mir-27a-3p    | 0.568151662  | 0.00896247  | 0.328527699  | 0.157293771 |
| let-7f-2-5p   | mir-106a-5p   | -0.384021717 | 0.094598811 | -0.609622732 | 0.004321584 |
| mir-106a-5p   | let-7f-1-5p   | -0.384021717 | 0.094598811 | -0.609622732 | 0.004321584 |
| mir-146b-5p   | norepi        | 0.218132029  | 0.355539877 | 0.481571141  | 0.031561886 |
| mir-101-1-3p  | mir-126-5p    | 0.335294696  | 0.14841342  | 0.045418663  | 0.849201633 |
| mir-126-5p    | mir-101-2-3p  | 0.335294696  | 0.14841342  | 0.045418663  | 0.849201633 |
| mir-151a-3p   | mir-185-5p    | 0.204817687  | 0.38636383  | -0.095125253 | 0.689946489 |
| mir-125a-5p   | mir-23a-3p    | 0.591041978  | 0.006063229 | 0.754100044  | 0.000122717 |
| mir-148a-3p   | mir-363-3p    | 0.212493765  | 0.368415457 | -0.086722598 | 0.716194922 |
| mir-194-2-5p  | mir-221-3p    | -0.495200488 | 0.026415215 | -0.235975498 | 0.316536104 |
| mir-194-1-5p  | mir-221-3p    | -0.495200488 | 0.026415215 | -0.235975498 | 0.316536104 |
| mir-584-5p    | mir-151a-5p   | 0.719683724  | 0.000347195 | 0.540308837  | 0.013916422 |
| mir-185-5p    | mir-15b-5p    | 0.725120084  | 0.000297591 | 0.54842415   | 0.012287449 |
| mir-192-5p    | mir-30e-5p    | 0.766209958  | 8.18E-05    | 0.610158311  | 0.004278309 |
| let-7f-2-5p   | mir-223-3p    | 0.702376027  | 0.000554687 | 0.825363157  | 7.47E-06    |

|               |               |              |             |              |             |
|---------------|---------------|--------------|-------------|--------------|-------------|
| mir-223-3p    | let-7f-1-5p   | 0.702376027  | 0.000554687 | 0.825363157  | 7.47E-06    |
| let-7a-3-5p   | mir-191-5p    | 0.920993436  | 8.53E-09    | 0.860195977  | 1.15E-06    |
| let-7a-2-5p   | mir-191-5p    | 0.920993436  | 8.53E-09    | 0.860195977  | 1.15E-06    |
| let-7a-1-5p   | mir-191-5p    | 0.920993436  | 8.53E-09    | 0.860195977  | 1.15E-06    |
| let-7a-3-5p   | mir-194-2-5p  | -0.459959548 | 0.041295765 | -0.193526285 | 0.413631313 |
| let-7a-3-5p   | mir-194-1-5p  | -0.459959548 | 0.041295765 | -0.193526285 | 0.413631313 |
| let-7a-2-5p   | mir-194-2-5p  | -0.459959548 | 0.041295765 | -0.193526285 | 0.413631313 |
| let-7a-2-5p   | mir-194-1-5p  | -0.459959548 | 0.041295765 | -0.193526285 | 0.413631313 |
| mir-194-2-5p  | let-7a-1-5p   | -0.459959548 | 0.041295765 | -0.193526285 | 0.413631313 |
| let-7a-1-5p   | mir-194-1-5p  | -0.459959548 | 0.041295765 | -0.193526285 | 0.413631313 |
| mir-629-5p    | mir-125b-1-5p | 0.149054284  | 0.530535417 | -0.149589858 | 0.529042546 |
| mir-629-5p    | mir-125b-2-5p | 0.149054284  | 0.530535417 | -0.149589858 | 0.529042546 |
| mir-191-5p    | mir-148b-3p   | 0.366902278  | 0.111550966 | 0.595108558  | 0.005639753 |
| mir-222-3p    | mir-423-5p    | 0.523383508  | 0.017874069 | 0.707179303  | 0.00048865  |
| mir-181a-2-5p | mir-340-5p    | 0.672106117  | 0.001170455 | 0.805798132  | 1.80E-05    |
| mir-340-5p    | mir-181a-1-5p | 0.672106117  | 0.001170455 | 0.805798132  | 1.80E-05    |
| mir-222-3p    | mir-425-5p    | 0.796632124  | 2.63E-05    | 0.657835742  | 0.00161813  |
| mir-126-3p    | mir-30e-5p    | -0.071491131 | 0.764547227 | 0.22478873   | 0.340677657 |
| mir-98-5p     | mir-375       | -0.006451956 | 0.978462728 | 0.285622202  | 0.222190532 |
| mir-126-3p    | mir-30c-1-5p  | 0.662628756  | 0.00145404  | 0.79963148   | 2.33E-05    |
| mir-126-3p    | mir-30c-2-5p  | 0.662628756  | 0.00145404  | 0.79963148   | 2.33E-05    |
| let-7d-5p     | mir-543       | 0.683956454  | 0.00088271  | 0.490274455  | 0.028192704 |
| let-7f-2-5p   | mir-15a-5p    | -0.598079147 | 0.005346047 | -0.757320558 | 0.000110401 |
| mir-15a-5p    | let-7f-1-5p   | -0.598079147 | 0.005346047 | -0.757320558 | 0.000110401 |
| mir-425-5p    | cpeptide      | -0.106690265 | 0.654375035 | 0.190304236  | 0.421598345 |
| mir-25-3p     | mir-191-5p    | -0.120051647 | 0.614157927 | -0.397127023 | 0.082957461 |
| mir-101-1-3p  | mir-30c-1-5p  | -0.385731233 | 0.093016073 | -0.106817606 | 0.653987161 |
| mir-101-1-3p  | mir-30c-2-5p  | -0.385731233 | 0.093016073 | -0.106817606 | 0.653987161 |
| mir-30c-1-5p  | mir-101-2-3p  | -0.385731233 | 0.093016073 | -0.106817606 | 0.653987161 |
| mir-101-2-3p  | mir-30c-2-5p  | -0.385731233 | 0.093016073 | -0.106817606 | 0.653987161 |
| mir-1307-3p   | mir-30e-5p    | -0.579340315 | 0.007429734 | -0.347051865 | 0.133827382 |
| mir-29a-3p    | mir-16-2-5p   | 0.489329122  | 0.028544324 | 0.231559172  | 0.325941108 |
| mir-29a-3p    | mir-16-1-5p   | 0.489329122  | 0.028544324 | 0.231559172  | 0.325941108 |
| mir-21-5p     | mir-340-5p    | 0.944511837  | 3.87E-10    | 0.901274611  | 5.89E-08    |
| mir-29a-3p    | mir-223-3p    | 0.30259045   | 0.19471866  | 0.545187741  | 0.012917525 |
| mir-374b-5p   | let-7g-5p     | 0.418976604  | 0.065955185 | 0.63248265   | 0.002767249 |
| let-7f-2-5p   | mir-340-5p    | 0.925797211  | 4.94E-09    | 0.869020573  | 6.63E-07    |
| mir-340-5p    | let-7f-1-5p   | 0.925797211  | 4.94E-09    | 0.869020573  | 6.63E-07    |
| mir-146a-5p   | mir-221-3p    | 0.90588802   | 3.89E-08    | 0.947127413  | 2.53E-10    |
| mir-122-5p    | mir-224-5p    | 0.363926162  | 0.114707706 | 0.591737995  | 0.005988952 |
| mir-26b-5p    | let-7d-5p     | -0.250697852 | 0.286374925 | -0.504212518 | 0.023392941 |
| mir-128-1-3p  | mir-150-5p    | 0.163740734  | 0.490320903 | -0.132707931 | 0.577014882 |
| mir-150-5p    | mir-128-2-3p  | 0.163740734  | 0.490320903 | -0.132707931 | 0.577014882 |
| mir-374b-5p   | mir-15b-5p    | 0.431795991  | 0.05728547  | 0.6412779    | 0.002309474 |
| mir-99a-5p    | mir-185-5p    | 0.239128285  | 0.309922603 | -0.054292854 | 0.820160896 |
| mir-17-5p     | mir-103a-2-3p | 0.579155968  | 0.007453123 | 0.348067888  | 0.132616335 |
| mir-17-5p     | mir-103a-1-3p | 0.579155968  | 0.007453123 | 0.348067888  | 0.132616335 |
| let-7i-5p     | mir-107       | 0.495048428  | 0.026468728 | 0.240028186  | 0.308050327 |
| mir-151a-3p   | let-7d-3p     | 0.741569983  | 0.000182518 | 0.848792496  | 2.24E-06    |
| mir-151a-3p   | mir-28-3p     | 0.629760324  | 0.002923375 | 0.777343433  | 5.51E-05    |
| mir-181b-2-5p | mir-629-5p    | 0.498763666  | 0.025185504 | 0.245205724  | 0.297411527 |
| mir-181b-1-5p | mir-629-5p    | 0.498763666  | 0.025185504 | 0.245205724  | 0.297411527 |
| mir-484       | mir-363-3p    | 0.699709583  | 0.00059451  | 0.514942455  | 0.020159036 |
| mir-451a      | mir-28-5p     | -0.184546932 | 0.436036715 | -0.449428414 | 0.046809239 |
| mir-320a      | copeptin      | 0.026899665  | 0.910369285 | -0.263966412 | 0.260769729 |
| mir-17-5p     | mir-186-5p    | 0.904249103  | 4.52E-08    | 0.833025273  | 5.14E-06    |
| mir-16-2-5p   | mir-106b-3p   | 0.928185651  | 3.71E-09    | 0.87366432   | 4.88E-07    |
| mir-106b-3p   | mir-16-1-5p   | 0.928185651  | 3.71E-09    | 0.87366432   | 4.88E-07    |
| mir-340-5p    | mir-375       | -0.291629645 | 0.212189622 | -0.003677728 | 0.987722456 |
| mir-143-3p    | mir-221-3p    | -0.130475724 | 0.583495114 | 0.163862922  | 0.489992746 |
| let-7i-5p     | mir-146b-5p   | 0.280814534  | 0.230412638 | 0.526107038  | 0.017182744 |
| mir-532-5p    | mir-425-5p    | 0.616392675  | 0.003800389 | 0.399516502  | 0.080954717 |
| mir-361-5p    | mir-374b-5p   | 0.527665491  | 0.01679689  | 0.707847994  | 0.00048001  |
| let-7a-3-5p   | mir-30d-5p    | 0.864042749  | 9.11E-07    | 0.767091874  | 7.93E-05    |

|               |               |              |             |              |             |
|---------------|---------------|--------------|-------------|--------------|-------------|
| let-7a-2-5p   | mir-30d-5p    | 0.864042749  | 9.11E-07    | 0.767091874  | 7.93E-05    |
| let-7a-1-5p   | mir-30d-5p    | 0.864042749  | 9.11E-07    | 0.767091874  | 7.93E-05    |
| mir-194-2-5p  | mir-148b-3p   | 0.276196788  | 0.238493606 | -0.012245936 | 0.959133647 |
| mir-148b-3p   | mir-194-1-5p  | 0.276196788  | 0.238493606 | -0.012245936 | 0.959133647 |
| mir-106a-5p   | mir-340-5p    | -0.259268623 | 0.269664075 | -0.508675388 | 0.022001364 |
| let-7i-5p     | mir-423-3p    | 0.37263507   | 0.105647529 | 0.596085408  | 0.005541741 |
| mir-21-5p     | mir-744-5p    | 0.888578237  | 1.67E-07    | 0.807586207  | 1.67E-05    |
| mir-146b-5p   | mir-10b-5p    | 0.205629084  | 0.384443915 | -0.086237212 | 0.717720917 |
| mir-26b-5p    | mir-185-5p    | 0.940178459  | 7.49E-10    | 0.894640287  | 1.03E-07    |
| mir-151a-3p   | norepi        | 0.241550571  | 0.304898555 | 0.493816861  | 0.026905294 |
| mir-126-3p    | mir-25-3p     | -0.188317754 | 0.426550898 | -0.450420085 | 0.046267165 |
| mir-21-5p     | mir-25-3p     | -0.365026855 | 0.113532821 | -0.589667304 | 0.006212154 |
| mir-103a-2-3p | mir-192-5p    | 0.292547077  | 0.210688929 | 0.007201626  | 0.975960907 |
| mir-192-5p    | mir-103a-1-3p | 0.292547077  | 0.210688929 | 0.007201626  | 0.975960907 |
| mir-148a-3p   | mir-20a-5p    | 0.327132061  | 0.159170034 | 0.045452214  | 0.849091464 |
| mir-143-3p    | mir-30d-5p    | -0.292889978 | 0.210129834 | -0.007954034 | 0.973450172 |
| mir-24-2-3p   | mir-128-1-3p  | 0.682154285  | 0.000922157 | 0.809890394  | 1.51E-05    |
| mir-24-2-3p   | mir-128-2-3p  | 0.682154285  | 0.000922157 | 0.809890394  | 1.51E-05    |
| mir-128-1-3p  | mir-24-1-3p   | 0.682154285  | 0.000922157 | 0.809890394  | 1.51E-05    |
| mir-128-2-3p  | mir-24-1-3p   | 0.682154285  | 0.000922157 | 0.809890394  | 1.51E-05    |
| mir-26b-5p    | mir-532-5p    | 0.848302719  | 2.30E-06    | 0.91270406   | 2.03E-08    |
| mir-26b-5p    | mir-181b-2-5p | 0.515788368  | 0.019920074 | 0.27036702   | 0.248953435 |
| mir-26b-5p    | mir-181b-1-5p | 0.515788368  | 0.019920074 | 0.27036702   | 0.248953435 |
| mir-361-5p    | mir-194-2-5p  | -0.522075379 | 0.018213929 | -0.278336839 | 0.234726145 |
| mir-361-5p    | mir-194-1-5p  | -0.522075379 | 0.018213929 | -0.278336839 | 0.234726145 |
| mir-26a-2-5p  | mir-106a-5p   | -0.376100329 | 0.102190801 | -0.59700864  | 0.005450401 |
| mir-106a-5p   | mir-26a-1-5p  | -0.376100329 | 0.102190801 | -0.59700864  | 0.005450401 |
| mir-103a-2-3p | mir-10a-5p    | 0.226142282  | 0.337700806 | 0.479771586  | 0.032296272 |
| mir-103a-1-3p | mir-10a-5p    | 0.226142282  | 0.337700806 | 0.479771586  | 0.032296272 |
| let-7i-5p     | mir-30a-5p    | -0.114848102 | 0.629702541 | 0.17528485   | 0.459800636 |
| mir-148a-3p   | mir-28-3p     | 0.029494778  | 0.901760566 | 0.310812005  | 0.18226534  |
| mir-532-5p    | mir-224-5p    | -0.077554232 | 0.745188205 | -0.353648436 | 0.126102614 |
| mir-181a-2-5p | mir-15b-5p    | 0.446208858  | 0.048602817 | 0.648005798  | 0.00200361  |
| mir-181a-1-5p | mir-15b-5p    | 0.446208858  | 0.048602817 | 0.648005798  | 0.00200361  |
| mir-143-3p    | mir-199a-2-3p | -0.058726743 | 0.805732625 | 0.228903996  | 0.331674557 |
| mir-143-3p    | mir-199a-1-3p | -0.058726743 | 0.805732625 | 0.228903996  | 0.331674557 |
| mir-143-3p    | mir-199b-3p   | -0.058726743 | 0.805732625 | 0.228903996  | 0.331674557 |
| mir-3615      | mir-128-1-3p  | -0.083619404 | 0.725968617 | -0.358778385 | 0.120318601 |
| mir-3615      | mir-128-2-3p  | -0.083619404 | 0.725968617 | -0.358778385 | 0.120318601 |
| mir-361-5p    | mir-181a-2-5p | 0.551555955  | 0.01170162  | 0.722102778  | 0.000324316 |
| mir-361-5p    | mir-181a-1-5p | 0.551555955  | 0.01170162  | 0.722102778  | 0.000324316 |
| mir-451a      | mir-223-3p    | -0.182139784 | 0.442149676 | -0.44270461  | 0.050614375 |
| mir-423-3p    | mir-150-5p    | -0.386780885 | 0.092053932 | -0.603704836 | 0.004824321 |
| mir-25-3p     | mir-224-5p    | 0.115533548  | 0.627646125 | -0.173117578 | 0.465455137 |
| mir-199a-1-5p | let-7d-3p     | 0.774458025  | 6.11E-05    | 0.629486874  | 0.002939454 |
| mir-199a-2-5p | let-7d-3p     | 0.774458025  | 6.11E-05    | 0.629486874  | 0.002939454 |
| mir-29a-3p    | mir-144-3p    | 0.439756252  | 0.052355639 | 0.179207312  | 0.449656817 |
| mir-151a-5p   | mir-139-5p    | 0.37539697   | 0.102885687 | 0.594986292  | 0.00565212  |
| mir-16-2-5p   | let-7d-5p     | -0.304777147 | 0.191352251 | -0.540773567 | 0.013818673 |
| let-7d-5p     | mir-16-1-5p   | -0.304777147 | 0.191352251 | -0.540773567 | 0.013818673 |
| mir-151a-5p   | mir-20a-5p    | -0.298188632 | 0.201615024 | -0.017093406 | 0.942978606 |
| mir-106a-5p   | mir-146b-5p   | -0.558392084 | 0.010501214 | -0.726283636 | 0.0002878   |
| mir-21-5p     | mir-15a-5p    | -0.639330714 | 0.00240494  | -0.780742791 | 4.86E-05    |
| mir-22-3p     | mir-199a-1-5p | -0.267779864 | 0.253687718 | 0.015751089  | 0.947450228 |
| mir-22-3p     | mir-199a-2-5p | -0.267779864 | 0.253687718 | 0.015751089  | 0.947450228 |
| mir-140-5p    | mir-199a-2-3p | 0.548498594  | 0.012273254 | 0.315279146  | 0.17573039  |
| mir-140-5p    | mir-199a-1-3p | 0.548498594  | 0.012273254 | 0.315279146  | 0.17573039  |
| mir-140-5p    | mir-199b-3p   | 0.548498594  | 0.012273254 | 0.315279146  | 0.17573039  |
| mir-361-5p    | mir-144-3p    | -0.54989773  | 0.01200892  | -0.720198597 | 0.000342214 |
| mir-423-5p    | mir-363-3p    | 0.608730903  | 0.004394447 | 0.39454979   | 0.085158414 |
| mir-25-3p     | let-7d-5p     | -0.310656178 | 0.182496229 | -0.544784277 | 0.012997868 |
| mir-191-5p    | mir-28-5p     | 0.767308763  | 7.87E-05    | 0.86257398   | 9.98E-07    |
| mir-22-3p     | mir-363-3p    | 0.740670263  | 0.000187636 | 0.580237312  | 0.007316788 |
| mir-223-3p    | mir-99b-5p    | 0.654443853  | 0.001743408 | 0.457748735  | 0.042409327 |

|               |               |              |             |              |             |
|---------------|---------------|--------------|-------------|--------------|-------------|
| let-7i-5p     | mir-221-3p    | 0.251596904  | 0.284592667 | 0.497220695  | 0.025712332 |
| mir-92a-2-3p  | let-7g-5p     | 0.036514389  | 0.878529999 | -0.246744431 | 0.294293615 |
| let-7g-5p     | mir-92a-1-3p  | 0.036514389  | 0.878529999 | -0.246744431 | 0.294293615 |
| mir-199a-1-5p | mir-125b-1-5p | -0.309094139 | 0.184821642 | -0.031073949 | 0.896527117 |
| mir-199a-1-5p | mir-125b-2-5p | -0.309094139 | 0.184821642 | -0.031073949 | 0.896527117 |
| mir-125b-1-5p | mir-199a-2-5p | -0.309094139 | 0.184821642 | -0.031073949 | 0.896527117 |
| mir-199a-2-5p | mir-125b-2-5p | -0.309094139 | 0.184821642 | -0.031073949 | 0.896527117 |
| mir-24-2-3p   | mir-28-3p     | 0.547887811  | 0.012390112 | 0.71810285   | 0.000362878 |
| mir-24-1-3p   | mir-28-3p     | 0.547887811  | 0.012390112 | 0.71810285   | 0.000362878 |
| mir-186-5p    | mir-28-3p     | -0.158633047 | 0.504134463 | -0.420415781 | 0.064935491 |
| mir-29a-3p    | mir-93-5p     | 0.479494827  | 0.032410391 | 0.229934242  | 0.329442866 |
| mir-194-2-5p  | mir-93-5p     | 0.784215301  | 4.27E-05    | 0.646086739  | 0.002087178 |
| mir-194-1-5p  | mir-93-5p     | 0.784215301  | 4.27E-05    | 0.646086739  | 0.002087178 |
| mir-7-3-5p    | let-7d-5p     | -0.297070851 | 0.203391828 | -0.532719138 | 0.015593164 |
| mir-7-1-5p    | let-7d-5p     | -0.297070851 | 0.203391828 | -0.532719138 | 0.015593164 |
| let-7d-5p     | mir-7-2-5p    | -0.297070851 | 0.203391828 | -0.532719138 | 0.015593164 |
| mir-224-5p    | mir-106b-3p   | -0.018467612 | 0.938402456 | -0.296459118 | 0.204368624 |
| mir-106a-5p   | mir-584-5p    | -0.339684293 | 0.142843583 | -0.565500391 | 0.009361021 |
| mir-224-5p    | mir-28-3p     | 0.320946986  | 0.167671201 | 0.550824902  | 0.011836304 |
| mir-451a      | mir-378a-3p   | 0.809361359  | 1.55E-05    | 0.684938924  | 0.000861812 |
| mir-191-5p    | let-7d-3p     | 0.905969865  | 3.86E-08    | 0.839023448  | 3.78E-06    |
| mir-194-2-5p  | let-7d-3p     | -0.458243205 | 0.042158277 | -0.205591816 | 0.384531982 |
| mir-194-1-5p  | let-7d-3p     | -0.458243205 | 0.042158277 | -0.205591816 | 0.384531982 |
| mir-26b-5p    | mir-181a-2-5p | 0.182780886  | 0.440517234 | -0.100981708 | 0.671849433 |
| mir-26b-5p    | mir-181a-1-5p | 0.182780886  | 0.440517234 | -0.100981708 | 0.671849433 |
| mir-584-5p    | mir-28-5p     | 0.513712503  | 0.020510552 | 0.69307093   | 0.000704324 |
| mir-15a-5p    | let-7g-5p     | 0.318514975  | 0.171097639 | 0.044062385  | 0.853657523 |
| mir-17-5p     | mir-98-5p     | 0.21387593   | 0.365234888 | -0.068549597 | 0.773988768 |
| mir-101-1-3p  | mir-23a-3p    | -0.226962452 | 0.33590447  | -0.475129224 | 0.034252571 |
| mir-101-2-3p  | mir-23a-3p    | -0.226962452 | 0.33590447  | -0.475129224 | 0.034252571 |
| mir-361-5p    | mir-128-1-3p  | 0.530814831  | 0.016038337 | 0.704840274  | 0.000519921 |
| mir-361-5p    | mir-128-2-3p  | 0.530814831  | 0.016038337 | 0.704840274  | 0.000519921 |
| let-7f-2-5p   | mir-543       | 0.692827434  | 0.000708658 | 0.513808382  | 0.020482976 |
| mir-543       | let-7f-1-5p   | 0.692827434  | 0.000708658 | 0.513808382  | 0.020482976 |
| mir-7-3-5p    | mir-150-5p    | 0.147273154  | 0.535514187 | 0.408511879  | 0.073735756 |
| mir-7-1-5p    | mir-150-5p    | 0.147273154  | 0.535514187 | 0.408511879  | 0.073735756 |
| mir-150-5p    | mir-7-2-5p    | 0.147273154  | 0.535514187 | 0.408511879  | 0.073735756 |
| mir-144-3p    | let-7b-5p     | 0.923363484  | 6.54E-09    | 0.868254032  | 6.97E-07    |
| mir-99a-5p    | mir-93-5p     | 0.158297057  | 0.505049659 | -0.125086389 | 0.599266819 |
| let-7b-5p     | mir-99b-5p    | -0.707780885 | 0.000480871 | -0.535207788 | 0.015026399 |
| mir-181a-2-5p | mir-221-3p    | 0.631072714  | 0.002847218 | 0.773293256  | 6.38E-05    |
| mir-221-3p    | mir-181a-1-5p | 0.631072714  | 0.002847218 | 0.773293256  | 6.38E-05    |
| mir-10b-5p    | mir-363-3p    | -0.002885096 | 0.990368407 | 0.275090429  | 0.2404565   |
| mir-7-3-5p    | cpeptide      | -0.108663837 | 0.648373239 | 0.174192976  | 0.462644975 |
| mir-7-1-5p    | cpeptide      | -0.108663837 | 0.648373239 | 0.174192976  | 0.462644975 |
| mir-7-2-5p    | cpeptide      | -0.108663837 | 0.648373239 | 0.174192976  | 0.462644975 |
| mir-7-3-5p    | mir-378a-3p   | 0.755725883  | 0.00011636  | 0.605209646  | 0.004692128 |
| mir-7-1-5p    | mir-378a-3p   | 0.755725883  | 0.00011636  | 0.605209646  | 0.004692128 |
| mir-378a-3p   | mir-7-2-5p    | 0.755725883  | 0.00011636  | 0.605209646  | 0.004692128 |
| mir-182-5p    | mir-532-5p    | 0.788393032  | 3.64E-05    | 0.874501705  | 4.61E-07    |
| mir-10b-5p    | mir-20a-5p    | -0.105401522 | 0.658305289 | 0.177051504  | 0.455217502 |
| mir-584-5p    | mir-7-3-5p    | -0.327476816 | 0.158705122 | -0.554404809 | 0.011188551 |
| mir-584-5p    | mir-7-1-5p    | -0.327476816 | 0.158705122 | -0.554404809 | 0.011188551 |
| mir-584-5p    | mir-7-2-5p    | -0.327476816 | 0.158705122 | -0.554404809 | 0.011188551 |
| mir-144-3p    | mir-24-2-3p   | -0.322071858 | 0.166102415 | -0.55017426  | 0.011957226 |
| mir-144-3p    | mir-24-1-3p   | -0.322071858 | 0.166102415 | -0.55017426  | 0.011957226 |
| mir-122-5p    | mir-151a-3p   | 0.159272288  | 0.502395457 | 0.418025778  | 0.066635449 |
| mir-340-5p    | mir-15b-5p    | 0.264096084  | 0.260526882 | 0.504175975  | 0.023404616 |
| mir-27b-3p    | mir-148a-3p   | 0.269575939  | 0.250395015 | 0.508511545  | 0.022051262 |
| mir-194-2-5p  | mir-125b-1-5p | 0.580096857  | 0.00733438  | 0.361411684  | 0.117424404 |
| mir-194-2-5p  | mir-125b-2-5p | 0.580096857  | 0.00733438  | 0.361411684  | 0.117424404 |
| mir-125b-1-5p | mir-194-1-5p  | 0.580096857  | 0.00733438  | 0.361411684  | 0.117424404 |
| mir-194-1-5p  | mir-125b-2-5p | 0.580096857  | 0.00733438  | 0.361411684  | 0.117424404 |
| mir-30d-5p    | mir-10a-5p    | 0.20003587   | 0.397786597 | 0.451705402  | 0.045571772 |

|               |               |              |             |              |             |
|---------------|---------------|--------------|-------------|--------------|-------------|
| mir-744-5p    | mir-378a-3p   | -0.61006771  | 0.004285604 | -0.401217516 | 0.07955101  |
| mir-451a      | mir-15a-5p    | 0.800524969  | 2.24E-05    | 0.881777636  | 2.77E-07    |
| let-7g-5p     | mir-20b-5p    | 0.509962012  | 0.021612636 | 0.272296272  | 0.245460047 |
| mir-222-3p    | copeptin      | 0.161506128  | 0.496341321 | -0.119744068 | 0.615072454 |
| mir-182-5p    | mir-320a      | 0.787939283  | 3.70E-05    | 0.654301433  | 0.001748841 |
| let-7i-5p     | mir-21-5p     | 0.426655305  | 0.060651445 | 0.628260252  | 0.00301249  |
| mir-125a-5p   | mir-320a      | -0.552573481 | 0.011516226 | -0.326978151 | 0.15937789  |
| let-7f-2-5p   | mir-106b-3p   | -0.432279967 | 0.05697604  | -0.63232718  | 0.002775974 |
| mir-106b-3p   | let-7f-1-5p   | -0.432279967 | 0.05697604  | -0.63232718  | 0.002775974 |
| mir-103a-2-3p | mir-30a-5p    | -0.019220795 | 0.93589511  | 0.256860012  | 0.274297124 |
| mir-103a-1-3p | mir-30a-5p    | -0.019220795 | 0.93589511  | 0.256860012  | 0.274297124 |
| mir-26a-2-5p  | mir-146b-5p   | 0.834307181  | 4.82E-06    | 0.902233106  | 5.41E-08    |
| mir-146b-5p   | mir-26a-1-5p  | 0.834307181  | 4.82E-06    | 0.902233106  | 5.41E-08    |
| mir-532-5p    | let-7b-5p     | 0.962178712  | 1.31E-11    | 0.934492838  | 1.66E-09    |
| mir-451a      | mir-186-5p    | 0.868805829  | 6.73E-07    | 0.780437575  | 4.92E-05    |
| mir-320a      | mir-15b-5p    | 0.657401844  | 0.001633721 | 0.467322824  | 0.037749301 |
| mir-26b-5p    | mir-144-3p    | 0.912506878  | 2.07E-08    | 0.94922281   | 1.77E-10    |
| mir-25-3p     | mir-28-5p     | -0.143331835 | 0.546607138 | -0.401772283 | 0.079097138 |
| mir-140-5p    | mir-7-3-5p    | 0.523183644  | 0.017925665 | 0.290725582  | 0.213675331 |
| mir-140-5p    | mir-7-1-5p    | 0.523183644  | 0.017925665 | 0.290725582  | 0.213675331 |
| mir-140-5p    | mir-7-2-5p    | 0.523183644  | 0.017925665 | 0.290725582  | 0.213675331 |
| mir-122-5p    | cpeptide      | 0.268069666  | 0.253154577 | -0.006466514 | 0.978414142 |
| mir-181b-2-5p | mir-320a      | 0.549262859  | 0.012128288 | 0.324077024  | 0.163331008 |
| mir-181b-1-5p | mir-320a      | 0.549262859  | 0.012128288 | 0.324077024  | 0.163331008 |
| mir-146a-5p   | cpeptide      | -0.053699552 | 0.822095888 | -0.322749986 | 0.165161562 |
| mir-106b-3p   | cpeptide      | -0.20081915  | 0.395902885 | 0.077218714  | 0.746255767 |
| mir-101-1-3p  | mir-27a-3p    | 0.699371567  | 0.000599727 | 0.526428429  | 0.017102596 |
| mir-27a-3p    | mir-101-2-3p  | 0.699371567  | 0.000599727 | 0.526428429  | 0.017102596 |
| mir-125b-1-5p | mir-126-5p    | 0.023980339  | 0.920064966 | 0.295712404  | 0.205565171 |
| mir-126-5p    | mir-125b-2-5p | 0.023980339  | 0.920064966 | 0.295712404  | 0.205565171 |
| mir-128-1-3p  | mir-28-5p     | 0.617385243  | 0.003728551 | 0.762254475  | 9.36E-05    |
| mir-128-2-3p  | mir-28-5p     | 0.617385243  | 0.003728551 | 0.762254475  | 9.36E-05    |
| mir-30d-5p    | mir-28-5p     | 0.594122654  | 0.005740115 | 0.746372567  | 0.000157173 |
| mir-140-5p    | mir-148a-3p   | 0.03013379   | 0.89964237  | 0.301074774  | 0.197075185 |
| mir-199a-2-3p | mir-185-5p    | -0.062859696 | 0.792337742 | -0.33040339  | 0.15479633  |
| mir-199a-1-3p | mir-185-5p    | -0.062859696 | 0.792337742 | -0.33040339  | 0.15479633  |
| mir-199b-3p   | mir-185-5p    | -0.062859696 | 0.792337742 | -0.33040339  | 0.15479633  |
| mir-144-3p    | mir-20b-5p    | 0.921790099  | 7.81E-09    | 0.866945443  | 7.58E-07    |
| mir-26a-2-5p  | mir-25-3p     | -0.32967228  | 0.155766494 | -0.55294558  | 0.011449026 |
| mir-25-3p     | mir-26a-1-5p  | -0.32967228  | 0.155766494 | -0.55294558  | 0.011449026 |
| let-7f-2-5p   | let-7d-5p     | 0.929153914  | 3.30E-09    | 0.958919986  | 2.73E-11    |
| let-7d-5p     | let-7f-1-5p   | 0.929153914  | 3.30E-09    | 0.958919986  | 2.73E-11    |
| mir-27a-3p    | mir-150-5p    | 0.617743224  | 0.00370292  | 0.41469292   | 0.069061633 |
| mir-10b-5p    | mir-151a-5p   | -0.085703968 | 0.71939856  | -0.349963555 | 0.130377558 |
| mir-25-3p     | mir-378a-3p   | 0.78389374   | 4.32E-05    | 0.650368745  | 0.001904575 |
| mir-17-5p     | mir-148b-3p   | 0.586115681  | 0.006610875 | 0.373334411  | 0.104943181 |
| mir-374b-5p   | mir-363-3p    | -0.033174927 | 0.889570782 | -0.302741069 | 0.194485519 |
| mir-26b-5p    | mir-191-5p    | -0.10153157  | 0.670159011 | -0.363622396 | 0.11503348  |
| mir-374b-5p   | mir-93-5p     | 0.13498331   | 0.570441422 | -0.142208471 | 0.549787798 |
| mir-29a-3p    | mir-584-5p    | -0.162691205 | 0.493144038 | 0.114311872  | 0.631313123 |
| let-7a-3-5p   | mir-378a-3p   | -0.438901622 | 0.052868822 | -0.189587301 | 0.42338219  |
| let-7a-2-5p   | mir-378a-3p   | -0.438901622 | 0.052868822 | -0.189587301 | 0.42338219  |
| let-7a-1-5p   | mir-378a-3p   | -0.438901622 | 0.052868822 | -0.189587301 | 0.42338219  |
| mir-144-3p    | mir-139-5p    | -0.143734457 | 0.545469199 | -0.400017014 | 0.080539794 |
| mir-17-5p     | mir-92a-2-3p  | 0.328107007  | 0.157857719 | 0.061697257  | 0.796099715 |
| mir-17-5p     | mir-92a-1-3p  | 0.328107007  | 0.157857719 | 0.061697257  | 0.796099715 |
| let-7i-5p     | mir-191-5p    | 0.557010628  | 0.01073536  | 0.719865128  | 0.000345433 |
| mir-148a-3p   | mir-543       | -0.176759188 | 0.455974215 | 0.09983248   | 0.675387357 |
| mir-17-5p     | mir-423-5p    | 0.838909622  | 3.81E-06    | 0.73467962   | 0.000224948 |
| mir-194-2-5p  | mir-543       | -0.264927882 | 0.258972515 | 0.007233636  | 0.97585409  |
| mir-194-1-5p  | mir-543       | -0.264927882 | 0.258972515 | 0.007233636  | 0.97585409  |
| mir-144-3p    | mir-7-3-5p    | 0.925583861  | 5.06E-09    | 0.873659209  | 4.88E-07    |
| mir-144-3p    | mir-7-1-5p    | 0.925583861  | 5.06E-09    | 0.873659209  | 4.88E-07    |
| mir-144-3p    | mir-7-2-5p    | 0.925583861  | 5.06E-09    | 0.873659209  | 4.88E-07    |



|               |               |              |             |              |             |
|---------------|---------------|--------------|-------------|--------------|-------------|
| mir-106a-5p   | mir-223-3p    | -0.194993706 | 0.41003007  | -0.442809551 | 0.050553226 |
| mir-126-3p    | mir-7-3-5p    | -0.212543237 | 0.368301345 | -0.457364723 | 0.04260509  |
| mir-126-3p    | mir-7-1-5p    | -0.212543237 | 0.368301345 | -0.457364723 | 0.04260509  |
| mir-126-3p    | mir-7-2-5p    | -0.212543237 | 0.368301345 | -0.457364723 | 0.04260509  |
| mir-126-3p    | mir-99b-5p    | 0.826893642  | 6.94E-06    | 0.716385751  | 0.000380592 |
| mir-340-5p    | mir-451a      | -0.242023827 | 0.303922779 | -0.481430005 | 0.031619006 |
| mir-423-3p    | mir-25-3p     | -0.46404945  | 0.039295459 | -0.652754383 | 0.001808779 |
| mir-106a-5p   | let-7d-3p     | -0.377695197 | 0.100627792 | -0.588244917 | 0.006369397 |
| mir-107       | mir-20b-5p    | 0.924774373  | 5.56E-09    | 0.872549381  | 5.26E-07    |
| mir-150-5p    | mir-30e-5p    | -0.203054265 | 0.3905548   | 0.071305974  | 0.765140605 |
| mir-1307-3p   | mir-128-1-3p  | 0.226649728  | 0.336588734 | 0.468317715  | 0.03728886  |
| mir-1307-3p   | mir-128-2-3p  | 0.226649728  | 0.336588734 | 0.468317715  | 0.03728886  |
| mir-629-5p    | mir-27a-3p    | 0.437361804  | 0.053803117 | 0.189554958  | 0.423462759 |
| mir-107       | mir-375       | -0.049195668 | 0.836816326 | 0.223978614  | 0.342466657 |
| mir-199a-2-3p | mir-28-5p     | 0.747181577  | 0.000153215 | 0.846480431  | 2.54E-06    |
| mir-199a-1-3p | mir-28-5p     | 0.747181577  | 0.000153215 | 0.846480431  | 2.54E-06    |
| mir-199b-3p   | mir-28-5p     | 0.747181577  | 0.000153215 | 0.846480431  | 2.54E-06    |
| mir-151a-5p   | mir-28-5p     | 0.496625768  | 0.025917771 | 0.67601792   | 0.001067828 |
| mir-486-2-5p  | mir-27a-3p    | 0.544205184  | 0.013113889 | 0.321630476  | 0.166716775 |
| mir-451a      | mir-30e-5p    | 0.722603763  | 0.000319742 | 0.562520974  | 0.00982599  |
| mir-144-3p    | mir-543       | -0.256136132 | 0.27569918  | -0.491824178 | 0.027623659 |
| mir-7-3-5p    | mir-224-5p    | 0.126526251  | 0.59503586  | -0.147942841 | 0.533639698 |
| mir-224-5p    | mir-7-1-5p    | 0.126526251  | 0.59503586  | -0.147942841 | 0.533639698 |
| mir-224-5p    | mir-7-2-5p    | 0.126526251  | 0.59503586  | -0.147942841 | 0.533639698 |
| mir-22-3p     | let-7f-2-5p   | -0.315864262 | 0.174886415 | -0.050804298 | 0.831552443 |
| mir-22-3p     | let-7f-1-5p   | -0.315864262 | 0.174886415 | -0.050804298 | 0.831552443 |
| mir-25-3p     | mir-23a-3p    | -0.234965148 | 0.318673241 | -0.474091281 | 0.034702344 |
| mir-26a-2-5p  | mir-10b-5p    | 0.073814777  | 0.757111416 | -0.199178839 | 0.399853317 |
| mir-10b-5p    | mir-26a-1-5p  | 0.073814777  | 0.757111416 | -0.199178839 | 0.399853317 |
| mir-192-5p    | mir-122-5p    | 0.452169374  | 0.045322735 | 0.208566558  | 0.377538065 |
| mir-143-3p    | mir-10a-5p    | 0.309260648  | 0.184572811 | 0.044085098  | 0.853582865 |
| mir-98-5p     | mir-532-5p    | -0.411721815 | 0.071279808 | -0.612696629 | 0.004078057 |
| mir-106b-3p   | mir-99b-5p    | -0.653215076 | 0.001790753 | -0.466350353 | 0.03820362  |
| mir-361-5p    | cpeptide      | -0.117731696 | 0.621069293 | -0.374582871 | 0.103694256 |
| mir-151a-3p   | mir-148b-3p   | 0.369322209  | 0.1090307   | 0.579986483  | 0.007348229 |
| mir-126-3p    | mir-194-2-5p  | -0.279810384 | 0.232154548 | -0.012812383 | 0.957244957 |
| mir-126-3p    | mir-194-1-5p  | -0.279810384 | 0.232154548 | -0.012812383 | 0.957244957 |
| mir-125b-1-5p | mir-15b-5p    | -0.094298281 | 0.692515295 | 0.178141649  | 0.452401174 |
| mir-125b-2-5p | mir-15b-5p    | -0.094298281 | 0.692515295 | 0.178141649  | 0.452401174 |
| mir-484       | copeptin      | -0.130721422 | 0.582780324 | -0.385134199 | 0.093566608 |
| mir-182-5p    | mir-185-5p    | 0.7615593    | 9.58E-05    | 0.620328979  | 0.003522085 |
| mir-181a-2-5p | mir-7-3-5p    | 0.094099037  | 0.693134688 | -0.177723526 | 0.453480307 |
| mir-181a-2-5p | mir-7-1-5p    | 0.094099037  | 0.693134688 | -0.177723526 | 0.453480307 |
| mir-181a-2-5p | mir-7-2-5p    | 0.094099037  | 0.693134688 | -0.177723526 | 0.453480307 |
| mir-7-3-5p    | mir-181a-1-5p | 0.094099037  | 0.693134688 | -0.177723526 | 0.453480307 |
| mir-7-1-5p    | mir-181a-1-5p | 0.094099037  | 0.693134688 | -0.177723526 | 0.453480307 |
| mir-7-2-5p    | mir-181a-1-5p | 0.094099037  | 0.693134688 | -0.177723526 | 0.453480307 |
| mir-144-3p    | mir-125a-5p   | -0.539439513 | 0.014100764 | -0.705058548 | 0.000516933 |
| let-7i-5p     | mir-122-5p    | -0.312920384 | 0.179160807 | -0.049889463 | 0.834545203 |
| mir-3615      | mir-139-5p    | -0.251599713 | 0.284587109 | -0.485949375 | 0.029829712 |
| mir-92a-2-3p  | mir-107       | 0.61000881   | 0.004290353 | 0.409940834  | 0.072634768 |
| mir-107       | mir-92a-1-3p  | 0.61000881   | 0.004290353 | 0.409940834  | 0.072634768 |
| mir-92a-2-3p  | mir-629-5p    | 0.709054044  | 0.000464754 | 0.820538231  | 9.37E-06    |
| mir-629-5p    | mir-92a-1-3p  | 0.709054044  | 0.000464754 | 0.820538231  | 9.37E-06    |
| mir-23a-3p    | mir-10a-5p    | 0.537129135  | 0.014600258 | 0.702910732  | 0.000546981 |
| mir-10b-5p    | mir-148b-3p   | -0.118795513 | 0.617896235 | -0.373322411 | 0.104955238 |
| let-7i-5p     | mir-185-5p    | 0.62452481   | 0.003244267 | 0.429705857  | 0.058636472 |
| let-7a-3-5p   | mir-126-5p    | 0.517213384  | 0.019522629 | 0.688601356  | 0.000787552 |
| let-7a-2-5p   | mir-126-5p    | 0.517213384  | 0.019522629 | 0.688601356  | 0.000787552 |
| let-7a-1-5p   | mir-126-5p    | 0.517213384  | 0.019522629 | 0.688601356  | 0.000787552 |
| mir-103a-2-3p | mir-27a-3p    | 0.221794084  | 0.347318093 | 0.460748165  | 0.040904066 |
| mir-103a-1-3p | mir-27a-3p    | 0.221794084  | 0.347318093 | 0.460748165  | 0.040904066 |
| mir-423-5p    | mir-24-2-3p   | -0.067993736 | 0.775776414 | 0.20150088   | 0.394267405 |
| mir-423-5p    | mir-24-1-3p   | -0.067993736 | 0.775776414 | 0.20150088   | 0.394267405 |

|               |               |              |             |              |             |
|---------------|---------------|--------------|-------------|--------------|-------------|
| mir-320a      | mir-20b-5p    | 0.895057011  | 9.96E-08    | 0.825719971  | 7.34E-06    |
| mir-125a-5p   | mir-139-5p    | 0.561079932  | 0.010057521 | 0.719485143  | 0.000349133 |
| mir-139-5p    | mir-106b-3p   | -0.272699634 | 0.244733652 | -0.501821728 | 0.024166583 |
| mir-181b-2-5p | mir-21-5p     | -0.126859919 | 0.594057178 | 0.143230481  | 0.546893768 |
| mir-21-5p     | mir-181b-1-5p | -0.126859919 | 0.594057178 | 0.143230481  | 0.546893768 |
| mir-17-5p     | mir-7-3-5p    | 0.772365764  | 6.59E-05    | 0.637779564  | 0.002483326 |
| mir-17-5p     | mir-7-1-5p    | 0.772365764  | 6.59E-05    | 0.637779564  | 0.002483326 |
| mir-17-5p     | mir-7-2-5p    | 0.772365764  | 6.59E-05    | 0.637779564  | 0.002483326 |
| mir-543       | mir-99b-5p    | 0.756284176  | 0.000114243 | 0.614459931  | 0.003943564 |
| mir-27b-3p    | mir-30e-5p    | -0.237332881 | 0.313678468 | 0.029464597  | 0.901860628 |
| mir-29a-3p    | let-7g-5p     | 0.214664296  | 0.363427781 | 0.453789854  | 0.04446115  |
| mir-26a-2-5p  | mir-194-2-5p  | -0.459069557 | 0.041741292 | -0.221026859 | 0.349031386 |
| mir-26a-2-5p  | mir-194-1-5p  | -0.459069557 | 0.041741292 | -0.221026859 | 0.349031386 |
| mir-194-2-5p  | mir-26a-1-5p  | -0.459069557 | 0.041741292 | -0.221026859 | 0.349031386 |
| mir-194-1-5p  | mir-26a-1-5p  | -0.459069557 | 0.041741292 | -0.221026859 | 0.349031386 |
| mir-101-1-3p  | mir-363-3p    | 0.945109809  | 3.52E-10    | 0.90740726   | 3.38E-08    |
| mir-101-2-3p  | mir-363-3p    | 0.945109809  | 3.52E-10    | 0.90740726   | 3.38E-08    |
| let-7f-2-5p   | mir-374b-5p   | 0.633819773  | 0.002693146 | 0.769375389  | 7.32E-05    |
| mir-374b-5p   | let-7f-1-5p   | 0.633819773  | 0.002693146 | 0.769375389  | 7.32E-05    |
| mir-140-5p    | mir-30e-5p    | 0.742199407  | 0.000179009 | 0.841520159  | 3.32E-06    |
| mir-181a-2-5p | mir-3615      | -0.095489155 | 0.688817137 | -0.351069225 | 0.129084202 |
| mir-3615      | mir-181a-1-5p | -0.095489155 | 0.688817137 | -0.351069225 | 0.129084202 |
| mir-98-5p     | mir-21-5p     | 0.789185809  | 3.53E-05    | 0.871708361  | 5.56E-07    |
| mir-451a      | mir-15b-5p    | 0.468882491  | 0.037029427 | 0.233465894  | 0.321860396 |
| mir-192-5p    | mir-629-5p    | 0.744354188  | 0.000167431 | 0.597590283  | 0.005393496 |
| mir-103a-2-3p | mir-543       | 0.255016451  | 0.277876631 | 0.48653435   | 0.029604043 |
| mir-103a-1-3p | mir-543       | 0.255016451  | 0.277876631 | 0.48653435   | 0.029604043 |
| mir-29a-3p    | mir-15a-5p    | 0.289223626  | 0.216158723 | 0.027144697  | 0.909556017 |
| mir-106a-5p   | cpeptide      | -0.147521821 | 0.534817803 | 0.121292167  | 0.610475056 |
| mir-222-3p    | mir-25-3p     | 0.841049914  | 3.40E-06    | 0.904280614  | 4.51E-08    |
| mir-451a      | mir-150-5p    | 0.269407753  | 0.250702184 | 0.498002009  | 0.025444486 |
| mir-99b-5p    | cpeptide      | -0.020088002 | 0.933008902 | -0.282233881 | 0.227964996 |
| mir-221-3p    | mir-363-3p    | -0.488893131 | 0.028707649 | -0.666589821 | 0.001329202 |
| mir-222-3p    | mir-361-5p    | -0.241446077 | 0.305114259 | -0.474589823 | 0.034485739 |
| mir-222-3p    | mir-16-2-5p   | 0.808935727  | 1.57E-05    | 0.883918149  | 2.37E-07    |
| mir-222-3p    | mir-16-1-5p   | 0.808935727  | 1.57E-05    | 0.883918149  | 2.37E-07    |
| mir-25-3p     | let-7g-5p     | 0.560956046  | 0.010077631 | 0.349497403  | 0.130925581 |
| mir-378a-3p   | mir-27a-3p    | 0.579858996  | 0.007364251 | 0.731280956  | 0.000248807 |
| mir-423-5p    | mir-486-2-5p  | 0.734920649  | 0.000223332 | 0.585141028  | 0.006723889 |
| mir-139-5p    | mir-15b-5p    | 0.238674981  | 0.310868312 | 0.47185577   | 0.035686692 |
| mir-106a-5p   | let-7a-3-5p   | -0.353079362 | 0.126756216 | -0.563387966 | 0.009688792 |
| mir-106a-5p   | let-7a-2-5p   | -0.353079362 | 0.126756216 | -0.563387966 | 0.009688792 |
| mir-106a-5p   | let-7a-1-5p   | -0.353079362 | 0.126756216 | -0.563387966 | 0.009688792 |
| mir-222-3p    | mir-30e-5p    | 0.688551997  | 0.000788515 | 0.805375036  | 1.83E-05    |
| mir-27a-3p    | copeptin      | 0.218081496  | 0.355654107 | -0.046652057 | 0.845153286 |
| mir-194-2-5p  | mir-191-5p    | -0.316175203 | 0.174439039 | -0.059289118 | 0.803906818 |
| mir-191-5p    | mir-194-1-5p  | -0.316175203 | 0.174439039 | -0.059289118 | 0.803906818 |
| mir-19b-2-3p  | mir-151a-3p   | 0.03959468   | 0.868365137 | -0.224382052 | 0.341575049 |
| mir-19b-1-3p  | mir-151a-3p   | 0.03959468   | 0.868365137 | -0.224382052 | 0.341575049 |
| mir-425-5p    | mir-28-5p     | 0.09178696   | 0.700335894 | 0.345087855  | 0.136190493 |
| mir-126-5p    | mir-23a-3p    | 0.482539224  | 0.031172264 | 0.660667215  | 0.001519418 |
| mir-744-5p    | mir-15b-5p    | -0.094997667 | 0.690342594 | 0.17053721   | 0.472233175 |
| mir-320a      | mir-27a-3p    | 0.603929037  | 0.004804433 | 0.406833947  | 0.075044427 |
| mir-24-2-3p   | mir-15a-5p    | -0.659262785 | 0.001567728 | -0.785253721 | 4.10E-05    |
| mir-15a-5p    | mir-24-1-3p   | -0.659262785 | 0.001567728 | -0.785253721 | 4.10E-05    |
| mir-27b-3p    | mir-543       | 0.631779004  | 0.002806922 | 0.443894529  | 0.04992431  |
| mir-122-5p    | mir-128-1-3p  | 0.090754562  | 0.703559416 | 0.343622443  | 0.137972746 |
| mir-122-5p    | mir-128-2-3p  | 0.090754562  | 0.703559416 | 0.343622443  | 0.137972746 |
| mir-423-5p    | mir-28-3p     | 0.038840769  | 0.87085124  | -0.22419526  | 0.341987697 |
| mir-144-3p    | mir-374b-5p   | 0.082608209  | 0.72916235  | -0.18183279  | 0.442932495 |
| mir-320a      | mir-185-5p    | 0.961917652  | 1.39E-11    | 0.935948248  | 1.36E-09    |
| mir-144-3p    | mir-30d-5p    | 0.074190428  | 0.755911218 | -0.189796431 | 0.422861426 |
| mir-199a-2-3p | mir-107       | -0.233024672 | 0.322801965 | -0.464987537 | 0.03884743  |
| mir-107       | mir-199a-1-3p | -0.233024672 | 0.322801965 | -0.464987537 | 0.03884743  |

|               |               |              |             |              |             |
|---------------|---------------|--------------|-------------|--------------|-------------|
| mir-107       | mir-199b-3p   | -0.233024672 | 0.322801965 | -0.464987537 | 0.03884743  |
| mir-423-3p    | mir-451a      | -0.520956274 | 0.01850876  | -0.687837994 | 0.000802566 |
| mir-320a      | mir-107       | 0.904823988  | 4.29E-08    | 0.843185431  | 3.04E-06    |
| mir-24-2-3p   | mir-23a-3p    | 0.774726215  | 6.06E-05    | 0.861224177  | 1.08E-06    |
| mir-23a-3p    | mir-24-1-3p   | 0.774726215  | 6.06E-05    | 0.861224177  | 1.08E-06    |
| mir-125a-5p   | mir-27a-3p    | -0.139560631 | 0.557317602 | 0.124701229  | 0.600400699 |
| mir-378a-3p   | copeptin      | 0.24292994   | 0.30205982  | -0.017874505 | 0.940377302 |
| mir-532-5p    | mir-106b-3p   | 0.93266908   | 2.11E-09    | 0.888111734  | 1.73E-07    |
| mir-423-5p    | mir-106b-3p   | 0.623655718  | 0.003300265 | 0.434545429  | 0.055544468 |
| mir-1307-3p   | mir-122-5p    | 0.275310005  | 0.240066107 | 0.499034483  | 0.025093923 |
| mir-150-5p    | mir-15b-5p    | -0.242628501 | 0.302678802 | 0.0178432    | 0.940481544 |
| mir-25-3p     | mir-375       | -0.055157923 | 0.817341362 | 0.207014486  | 0.381178156 |
| mir-22-3p     | mir-19b-2-3p  | 0.900421415  | 6.34E-08    | 0.836453609  | 4.32E-06    |
| mir-22-3p     | mir-19b-1-3p  | 0.900421415  | 6.34E-08    | 0.836453609  | 4.32E-06    |
| let-7d-3p     | mir-363-3p    | -0.393408397 | 0.086146818 | -0.592178439 | 0.005942336 |
| let-7b-5p     | mir-374b-5p   | -0.172379302 | 0.467389355 | -0.412726931 | 0.07052352  |
| mir-151a-3p   | mir-150-5p    | 0.132469311  | 0.577706128 | -0.130372072 | 0.583796774 |
| mir-26a-2-5p  | mir-15b-5p    | 0.168635423  | 0.477260339 | 0.409157543  | 0.073236749 |
| mir-26a-1-5p  | mir-15b-5p    | 0.168635423  | 0.477260339 | 0.409157543  | 0.073236749 |
| mir-29a-3p    | mir-361-5p    | 0.012094873  | 0.95963737  | 0.26954467   | 0.250452105 |
| mir-143-3p    | mir-486-2-5p  | -0.309915446 | 0.183596476 | -0.52609268  | 0.017186331 |
| let-7a-3-5p   | mir-30c-1-5p  | 0.870300161  | 6.10E-07    | 0.789477244  | 3.49E-05    |
| let-7a-3-5p   | mir-30c-2-5p  | 0.870300161  | 6.10E-07    | 0.789477244  | 3.49E-05    |
| let-7a-2-5p   | mir-30c-1-5p  | 0.870300161  | 6.10E-07    | 0.789477244  | 3.49E-05    |
| let-7a-2-5p   | mir-30c-2-5p  | 0.870300161  | 6.10E-07    | 0.789477244  | 3.49E-05    |
| let-7a-1-5p   | mir-30c-1-5p  | 0.870300161  | 6.10E-07    | 0.789477244  | 3.49E-05    |
| let-7a-1-5p   | mir-30c-2-5p  | 0.870300161  | 6.10E-07    | 0.789477244  | 3.49E-05    |
| mir-144-3p    | mir-629-5p    | 0.907001305  | 3.51E-08    | 0.847206755  | 2.44E-06    |
| mir-425-5p    | mir-24-2-3p   | -0.02750296  | 0.908367094 | 0.232338917  | 0.324268621 |
| mir-425-5p    | mir-24-1-3p   | -0.02750296  | 0.908367094 | 0.232338917  | 0.324268621 |
| mir-151a-5p   | mir-375       | 0.040641261  | 0.864915892 | -0.219769955 | 0.35184876  |
| mir-182-5p    | mir-378a-3p   | 0.623679736  | 0.003298706 | 0.435742872  | 0.054798932 |
| mir-378a-3p   | cpeptide      | 0.085095391  | 0.721314717 | 0.335645856  | 0.147962352 |
| mir-181a-2-5p | mir-151a-5p   | 0.500183795  | 0.02470819  | 0.671381166  | 0.001190358 |
| mir-151a-5p   | mir-181a-1-5p | 0.500183795  | 0.02470819  | 0.671381166  | 0.001190358 |
| mir-92a-2-3p  | mir-340-5p    | -0.61945721  | 0.003582215 | -0.756422658 | 0.000113723 |
| mir-340-5p    | mir-92a-1-3p  | -0.61945721  | 0.003582215 | -0.756422658 | 0.000113723 |
| mir-144-3p    | mir-223-3p    | -0.084072327 | 0.724539525 | -0.334541163 | 0.149384574 |
| mir-151a-5p   | mir-30e-5p    | 0.069012185  | 0.772501923 | 0.320938908  | 0.167682502 |
| mir-106a-5p   | mir-150-5p    | 0.142983443  | 0.547592675 | 0.386377427  | 0.092422884 |
| mir-139-5p    | mir-93-5p     | 0.048321333  | 0.839680209 | -0.211867772 | 0.369861125 |
| mir-148a-3p   | mir-10a-5p    | 0.21381713   | 0.365369875 | -0.046108243 | 0.846937783 |
| mir-199a-1-5p | mir-363-3p    | -0.409368183 | 0.073074501 | -0.60315764  | 0.004873146 |
| mir-199a-2-5p | mir-363-3p    | -0.409368183 | 0.073074501 | -0.60315764  | 0.004873146 |
| mir-151a-5p   | mir-484       | 0.051080207  | 0.830650278 | 0.304307963  | 0.192071238 |
| mir-151a-5p   | let-7g-5p     | 0.105383787  | 0.658359436 | 0.353003547  | 0.126843473 |
| mir-532-5p    | cpeptide      | -0.053032336 | 0.82427312  | 0.206822092  | 0.381630747 |
| mir-21-5p     | mir-363-3p    | -0.397995686 | 0.082225195 | -0.594233044 | 0.005728805 |
| mir-186-5p    | mir-363-3p    | 0.899443716  | 6.90E-08    | 0.835622453  | 4.51E-06    |
| mir-423-5p    | mir-223-3p    | 0.26219327   | 0.264104769 | 0.006035703  | 0.979851941 |
| mir-7-3-5p    | mir-191-5p    | -0.169931194 | 0.473832211 | -0.408566088 | 0.073693762 |
| mir-191-5p    | mir-7-1-5p    | -0.169931194 | 0.473832211 | -0.408566088 | 0.073693762 |
| mir-191-5p    | mir-7-2-5p    | -0.169931194 | 0.473832211 | -0.408566088 | 0.073693762 |
| mir-17-5p     | let-7b-5p     | 0.736463397  | 0.000213228 | 0.591903499  | 0.0059714   |
| mir-19b-2-3p  | mir-23a-3p    | -0.149605667 | 0.528998508 | -0.390859493 | 0.088384589 |
| mir-19b-1-3p  | mir-23a-3p    | -0.149605667 | 0.528998508 | -0.390859493 | 0.088384589 |
| mir-30c-1-5p  | mir-484       | 0.103112249  | 0.665308102 | 0.350078697  | 0.130242445 |
| mir-484       | mir-30c-2-5p  | 0.103112249  | 0.665308102 | 0.350078697  | 0.130242445 |
| mir-29a-3p    | mir-192-5p    | 0.539944565  | 0.013993429 | 0.329370216  | 0.156168552 |
| mir-21-5p     | mir-378a-3p   | -0.427576578 | 0.060037479 | -0.192556254 | 0.416021254 |
| mir-106a-5p   | let-7g-5p     | 0.522387507  | 0.018132371 | 0.307722034  | 0.186880755 |
| mir-28-5p     | norepi        | 0.180462271  | 0.446436064 | 0.416950261  | 0.067411267 |
| mir-199a-1-5p | let-7b-5p     | -0.579554947 | 0.00740258  | -0.727062441 | 0.0002814   |
| let-7b-5p     | mir-199a-2-5p | -0.579554947 | 0.00740258  | -0.727062441 | 0.0002814   |

|               |               |              |             |              |             |
|---------------|---------------|--------------|-------------|--------------|-------------|
| mir-222-3p    | mir-144-3p    | 0.684967973  | 0.0008612   | 0.800166406  | 2.28E-05    |
| mir-21-5p     | let-7b-5p     | -0.499154756 | 0.025053336 | -0.668918922 | 0.001260099 |
| mir-24-2-3p   | copeptin      | -0.049910329 | 0.834476918 | -0.300894976 | 0.197355987 |
| mir-24-1-3p   | copeptin      | -0.049910329 | 0.834476918 | -0.300894976 | 0.197355987 |
| mir-146b-5p   | mir-199a-1-5p | 0.557537629  | 0.010645543 | 0.711127508  | 0.000437735 |
| mir-146b-5p   | mir-199a-2-5p | 0.557537629  | 0.010645543 | 0.711127508  | 0.000437735 |
| mir-148b-3p   | norepi        | 0.382843069  | 0.095701471 | 0.141968227  | 0.550469096 |
| mir-221-3p    | let-7d-3p     | 0.912468676  | 2.08E-08    | 0.856968111  | 1.40E-06    |
| mir-30d-5p    | mir-151a-5p   | 0.495362633  | 0.026358247 | 0.66592      | 0.001349655 |
| mir-320a      | mir-128-1-3p  | 0.247533161  | 0.292703189 | -0.007298874 | 0.975636386 |
| mir-320a      | mir-128-2-3p  | 0.247533161  | 0.292703189 | -0.007298874 | 0.975636386 |
| mir-107       | mir-486-2-5p  | 0.944059537  | 4.16E-10    | 0.907660426  | 3.30E-08    |
| mir-17-5p     | mir-30c-1-5p  | -0.007934794 | 0.973514373 | 0.24654818   | 0.294690163 |
| mir-17-5p     | mir-30c-2-5p  | -0.007934794 | 0.973514373 | 0.24654818   | 0.294690163 |
| let-7a-3-5p   | mir-148b-3p   | 0.28702972   | 0.219820201 | 0.504098542  | 0.023429371 |
| let-7a-2-5p   | mir-148b-3p   | 0.28702972   | 0.219820201 | 0.504098542  | 0.023429371 |
| let-7a-1-5p   | mir-148b-3p   | 0.28702972   | 0.219820201 | 0.504098542  | 0.023429371 |
| mir-222-3p    | mir-543       | -0.112109646 | 0.637944303 | -0.355641535 | 0.123832377 |
| let-7i-5p     | copeptin      | -0.001321989 | 0.995586599 | -0.254821902 | 0.278256059 |
| mir-361-5p    | mir-378a-3p   | -0.514615437 | 0.020252025 | -0.300281089 | 0.198316755 |
| mir-223-3p    | mir-543       | 0.533211182  | 0.015479766 | 0.323447249  | 0.164197987 |
| mir-30d-5p    | mir-23a-3p    | 0.525899652  | 0.017234621 | 0.687530408  | 0.000808684 |
| mir-106a-5p   | mir-199a-1-5p | -0.503478004 | 0.023628506 | -0.671049252 | 0.001199565 |
| mir-106a-5p   | mir-199a-2-5p | -0.503478004 | 0.023628506 | -0.671049252 | 0.001199565 |
| mir-10a-5p    | mir-99a-5p    | 0.526461577  | 0.017094347 | 0.687787903  | 0.00080356  |
| mir-151a-5p   | mir-99b-5p    | 0.372794177  | 0.105486983 | 0.132653953  | 0.577171218 |
| mir-101-1-3p  | let-7d-5p     | -0.289470224 | 0.215749691 | -0.505037431 | 0.023130606 |
| let-7d-5p     | mir-101-2-3p  | -0.289470224 | 0.215749691 | -0.505037431 | 0.023130606 |
| mir-19b-2-3p  | mir-27b-3p    | -0.149426855 | 0.529496698 | -0.387075857 | 0.091784871 |
| mir-27b-3p    | mir-19b-1-3p  | -0.149426855 | 0.529496698 | -0.387075857 | 0.091784871 |
| mir-192-5p    | mir-143-3p    | -0.237332307 | 0.313679675 | -0.461902478 | 0.04033592  |
| mir-222-3p    | cpeptide      | -0.120030766 | 0.614219995 | 0.136272756  | 0.56673082  |
| mir-340-5p    | mir-15a-5p    | -0.492482344 | 0.02738474  | -0.662296229 | 0.001464954 |
| mir-10b-5p    | mir-423-3p    | -0.352682635 | 0.127213292 | -0.555224213 | 0.011044405 |
| mir-320a      | mir-378a-3p   | 0.766205393  | 8.18E-05    | 0.637520445  | 0.002496625 |
| mir-106a-5p   | mir-140-5p    | 0.413631953  | 0.069847705 | 0.181080586  | 0.444853634 |
| mir-191-5p    | mir-93-5p     | -0.010171157 | 0.966053259 | -0.260687978 | 0.266957009 |
| mir-744-5p    | let-7b-5p     | -0.641476755 | 0.002299905 | -0.76878071  | 7.48E-05    |
| mir-340-5p    | let-7g-5p     | 0.322420875  | 0.16561772  | 0.530604796  | 0.016088055 |
| mir-191-5p    | mir-375       | -0.023715073 | 0.920946526 | 0.228725153  | 0.33206287  |
| mir-361-5p    | mir-486-2-5p  | -0.570620293 | 0.00860391  | -0.71871745  | 0.000356711 |
| mir-17-5p     | mir-16-2-5p   | 0.83615543   | 4.39E-06    | 0.740557655  | 0.000188285 |
| mir-17-5p     | mir-16-1-5p   | 0.83615543   | 4.39E-06    | 0.740557655  | 0.000188285 |
| mir-192-5p    | mir-148b-3p   | 0.311404909  | 0.181388647 | 0.06552801   | 0.783719162 |
| mir-222-3p    | mir-484       | 0.5820753    | 0.007089742 | 0.726795575  | 0.000283579 |
| mir-25-3p     | mir-143-3p    | -0.270727058 | 0.248299099 | -0.48837552  | 0.028902503 |
| mir-7-3-5p    | mir-199a-1-5p | -0.452058411 | 0.045382199 | -0.631091477 | 0.002846142 |
| mir-7-3-5p    | mir-199a-2-5p | -0.452058411 | 0.045382199 | -0.631091477 | 0.002846142 |
| mir-199a-1-5p | mir-7-1-5p    | -0.452058411 | 0.045382199 | -0.631091477 | 0.002846142 |
| mir-199a-1-5p | mir-7-2-5p    | -0.452058411 | 0.045382199 | -0.631091477 | 0.002846142 |
| mir-7-1-5p    | mir-199a-2-5p | -0.452058411 | 0.045382199 | -0.631091477 | 0.002846142 |
| mir-7-2-5p    | mir-199a-2-5p | -0.452058411 | 0.045382199 | -0.631091477 | 0.002846142 |
| mir-425-5p    | mir-378a-3p   | 0.47825744   | 0.032924478 | 0.650760145  | 0.001888573 |
| mir-223-3p    | mir-224-5p    | 0.439389209  | 0.05257557  | 0.621427875  | 0.003447485 |
| mir-19b-2-3p  | mir-584-5p    | -0.238655058 | 0.310909917 | -0.461377487 | 0.040593556 |
| mir-584-5p    | mir-19b-1-3p  | -0.238655058 | 0.310909917 | -0.461377487 | 0.040593556 |
| mir-26a-2-5p  | mir-425-5p    | -0.119580312 | 0.615559573 | 0.134651814  | 0.571397065 |
| mir-425-5p    | mir-26a-1-5p  | -0.119580312 | 0.615559573 | 0.134651814  | 0.571397065 |
| mir-99a-5p    | cpeptide      | 0.141734805  | 0.551131414 | -0.112444939 | 0.636932966 |
| mir-192-5p    | mir-148a-3p   | 0.553250818  | 0.011394138 | 0.351924633  | 0.128089856 |
| mir-106b-3p   | mir-23a-3p    | -0.410810688 | 0.071970604 | -0.599156578 | 0.005242685 |
| mir-191-5p    | mir-23a-3p    | 0.681620119  | 0.000934131 | 0.795897234  | 2.71E-05    |
| mir-182-5p    | mir-99b-5p    | -0.576916638 | 0.007742068 | -0.722515636 | 0.000320543 |
| mir-181b-2-5p | mir-148a-3p   | -0.080229841 | 0.736690993 | 0.172784096  | 0.466328327 |

|               |               |              |             |              |             |
|---------------|---------------|--------------|-------------|--------------|-------------|
| mir-181b-1-5p | mir-148a-3p   | -0.080229841 | 0.736690993 | 0.172784096  | 0.466328327 |
| mir-30d-5p    | let-7b-5p     | -0.046742249 | 0.844857394 | -0.292786902 | 0.210297796 |
| mir-374b-5p   | mir-30a-5p    | -0.010614839 | 0.96457332  | 0.239377754  | 0.309402888 |
| mir-744-5p    | mir-30a-5p    | -0.030953044 | 0.896927661 | 0.220011083  | 0.351307249 |
| mir-22-3p     | mir-3615      | 0.652359607  | 0.001824347 | 0.481370013  | 0.03164331  |
| mir-92a-2-3p  | mir-532-5p    | 0.804202376  | 1.93E-05    | 0.694271728  | 0.000683279 |
| mir-532-5p    | mir-92a-1-3p  | 0.804202376  | 1.93E-05    | 0.694271728  | 0.000683279 |
| mir-98-5p     | mir-15b-5p    | 0.479756185  | 0.032302614 | 0.262386596  | 0.263739849 |
| mir-27b-3p    | mir-26b-5p    | -0.309359454 | 0.184425262 | -0.5180814   | 0.01928365  |
| mir-361-5p    | mir-20b-5p    | -0.502067896 | 0.024086002 | -0.667269189 | 0.001308724 |
| let-7a-3-5p   | mir-199a-1-5p | 0.741227634  | 0.000184451 | 0.604081956  | 0.004790907 |
| let-7a-3-5p   | mir-199a-2-5p | 0.741227634  | 0.000184451 | 0.604081956  | 0.004790907 |
| mir-199a-1-5p | let-7a-2-5p   | 0.741227634  | 0.000184451 | 0.604081956  | 0.004790907 |
| mir-199a-1-5p | let-7a-1-5p   | 0.741227634  | 0.000184451 | 0.604081956  | 0.004790907 |
| let-7a-2-5p   | mir-199a-2-5p | 0.741227634  | 0.000184451 | 0.604081956  | 0.004790907 |
| let-7a-1-5p   | mir-199a-2-5p | 0.741227634  | 0.000184451 | 0.604081956  | 0.004790907 |
| mir-19b-2-3p  | mir-224-5p    | 0.191437735  | 0.418786258 | -0.059714119 | 0.802527657 |
| mir-224-5p    | mir-19b-1-3p  | 0.191437735  | 0.418786258 | -0.059714119 | 0.802527657 |
| mir-16-2-5p   | mir-363-3p    | 0.929039786  | 3.34E-09    | 0.956651192  | 4.38E-11    |
| mir-16-1-5p   | mir-363-3p    | 0.929039786  | 3.34E-09    | 0.956651192  | 4.38E-11    |
| mir-340-5p    | mir-194-2-5p  | -0.42012868  | 0.065137955 | -0.192020714 | 0.417343891 |
| mir-340-5p    | mir-194-1-5p  | -0.42012868  | 0.065137955 | -0.192020714 | 0.417343891 |
| mir-10b-5p    | mir-128-1-3p  | 0.126050218  | 0.596433278 | -0.125838157 | 0.597056235 |
| mir-10b-5p    | mir-128-2-3p  | 0.126050218  | 0.596433278 | -0.125838157 | 0.597056235 |
| mir-92a-2-3p  | mir-20a-5p    | 0.464899827  | 0.038889151 | 0.245501375  | 0.296810884 |
| mir-20a-5p    | mir-92a-1-3p  | 0.464899827  | 0.038889151 | 0.245501375  | 0.296810884 |
| mir-106a-5p   | mir-15a-5p    | 0.822552406  | 8.53E-06    | 0.889051894  | 1.61E-07    |
| mir-451a      | mir-23a-3p    | -0.330873717 | 0.15417444  | -0.534526135 | 0.015179965 |
| mir-125a-5p   | mir-224-5p    | 0.329748301  | 0.15566542  | 0.533586563  | 0.015393701 |
| mir-423-3p    | mir-99b-5p    | 0.545819068  | 0.012792612 | 0.345277803  | 0.13596067  |
| mir-1307-3p   | mir-99a-5p    | 0.077285514  | 0.746043187 | 0.31825173   | 0.171471374 |
| mir-451a      | mir-221-3p    | -0.475319996 | 0.034170401 | -0.646425982 | 0.002072197 |
| mir-30a-5p    | let-7g-5p     | -0.081374294 | 0.733065334 | 0.168936661  | 0.476462271 |
| mir-222-3p    | let-7g-5p     | 0.38790451   | 0.091032097 | 0.579292808  | 0.007435756 |
| mir-29a-3p    | mir-185-5p    | 0.473452341  | 0.034981497 | 0.256588441  | 0.274822597 |
| mir-3615      | mir-28-5p     | -0.231138506 | 0.326845523 | -0.45198968  | 0.045419061 |
| mir-29a-3p    | mir-10b-5p    | 0.624518116  | 0.003244696 | 0.446798322  | 0.048270556 |
| mir-194-2-5p  | mir-30d-5p    | -0.253058531 | 0.281709841 | -0.007016639 | 0.976578232 |
| mir-30d-5p    | mir-194-1-5p  | -0.253058531 | 0.281709841 | -0.007016639 | 0.976578232 |
| mir-1307-3p   | mir-374b-5p   | 0.215766519  | 0.360909834 | 0.438752503  | 0.052958756 |
| mir-340-5p    | mir-425-5p    | -0.043378342 | 0.85590649  | 0.205037909  | 0.385842216 |
| mir-223-3p    | cpeptide      | -0.060963486 | 0.798476633 | -0.302625882 | 0.194663799 |
| mir-140-5p    | mir-151a-5p   | 0.281432805  | 0.22934435  | 0.49342453   | 0.027045553 |
| mir-361-5p    | mir-27a-3p    | -0.139627501 | 0.557126874 | 0.110299597  | 0.643414509 |
| mir-148b-3p   | let-7g-5p     | 0.515039477  | 0.020131513 | 0.675312122  | 0.001085762 |
| mir-29a-3p    | mir-199a-1-5p | -0.119645079 | 0.615366894 | 0.129778931  | 0.585524273 |
| mir-29a-3p    | mir-199a-2-5p | -0.119645079 | 0.615366894 | 0.129778931  | 0.585524273 |
| mir-19b-2-3p  | mir-27a-3p    | 0.693831838  | 0.000690926 | 0.540326489  | 0.013912698 |
| mir-19b-1-3p  | mir-27a-3p    | 0.693831838  | 0.000690926 | 0.540326489  | 0.013912698 |
| mir-101-1-3p  | mir-425-5p    | 0.756971381  | 0.000111683 | 0.628265843  | 0.003012154 |
| mir-425-5p    | mir-101-2-3p  | 0.756971381  | 0.000111683 | 0.628265843  | 0.003012154 |
| mir-26b-5p    | mir-30c-1-5p  | -0.365638889 | 0.11288329  | -0.132112516 | 0.578740374 |
| mir-26b-5p    | mir-30c-2-5p  | -0.365638889 | 0.11288329  | -0.132112516 | 0.578740374 |
| mir-423-3p    | mir-93-5p     | -0.279171684 | 0.23326694  | -0.490888522 | 0.027966132 |
| mir-532-5p    | mir-125a-5p   | -0.8056673   | 1.81E-05    | -0.698481828 | 0.000613645 |
| mir-221-3p    | mir-93-5p     | -0.296272008 | 0.204668016 | -0.504653482 | 0.023252416 |
| mir-199a-2-3p | mir-320a      | -0.162837096 | 0.492751128 | -0.392156845 | 0.087240315 |
| mir-320a      | mir-199a-1-3p | -0.162837096 | 0.492751128 | -0.392156845 | 0.087240315 |
| mir-320a      | mir-199b-3p   | -0.162837096 | 0.492751128 | -0.392156845 | 0.087240315 |
| mir-20a-5p    | mir-99a-5p    | 0.306137257  | 0.189278221 | 0.06615908   | 0.781684326 |
| mir-126-5p    | mir-99a-5p    | -0.03738153  | 0.875666543 | 0.209386487  | 0.375623007 |
| mir-10b-5p    | mir-221-3p    | 0.164512399  | 0.488250275 | -0.083575666 | 0.726106669 |
| mir-29a-3p    | mir-363-3p    | 0.416575854  | 0.067682929 | 0.191480166  | 0.418681189 |
| mir-191-5p    | mir-10a-5p    | 0.247421069  | 0.292928893 | 0.463890561  | 0.039371739 |

|               |               |              |             |              |             |
|---------------|---------------|--------------|-------------|--------------|-------------|
| mir-146b-5p   | mir-486-2-5p  | -0.555439894 | 0.011006714 | -0.704261382 | 0.000527917 |
| mir-17-5p     | mir-144-3p    | 0.769086798  | 7.40E-05    | 0.646303477  | 0.002077596 |
| mir-192-5p    | mir-151a-3p   | 0.118873781  | 0.617663043 | -0.128942561 | 0.587963841 |
| mir-17-5p     | mir-451a      | 0.729025979  | 0.000265803 | 0.590003201  | 0.00617549  |
| mir-223-3p    | mir-93-5p     | -0.012229247 | 0.959189298 | -0.255401356 | 0.277126902 |
| mir-15a-5p    | mir-27a-3p    | 0.352571371  | 0.127341691 | 0.118871732  | 0.617669148 |
| mir-29a-3p    | mir-191-5p    | 0.054287662  | 0.820177824 | 0.294165539  | 0.208058664 |
| mir-106a-5p   | mir-30d-5p    | -0.017488726 | 0.941661995 | -0.260148306 | 0.267984279 |
| let-7a-3-5p   | mir-363-3p    | -0.348178929 | 0.132484452 | -0.545405216 | 0.012874385 |
| let-7a-2-5p   | mir-363-3p    | -0.348178929 | 0.132484452 | -0.545405216 | 0.012874385 |
| let-7a-1-5p   | mir-363-3p    | -0.348178929 | 0.132484452 | -0.545405216 | 0.012874385 |
| mir-125a-5p   | mir-374b-5p   | 0.647993966  | 0.002004116 | 0.480460693  | 0.03201349  |
| mir-744-5p    | mir-106b-3p   | -0.60450014  | 0.004754079 | -0.739031715 | 0.000197272 |
| mir-25-3p     | mir-30d-5p    | 0.045008476  | 0.850548797 | -0.200299202 | 0.39715276  |
| mir-16-2-5p   | mir-28-5p     | -0.113671029 | 0.633240015 | -0.347092815 | 0.133778421 |
| mir-16-1-5p   | mir-28-5p     | -0.113671029 | 0.633240015 | -0.347092815 | 0.133778421 |
| mir-181b-2-5p | mir-423-3p    | -0.142744415 | 0.548269304 | 0.103609465  | 0.663784839 |
| mir-423-3p    | mir-181b-1-5p | -0.142744415 | 0.548269304 | 0.103609465  | 0.663784839 |
| mir-22-3p     | mir-423-5p    | 0.756905381  | 0.000111927 | 0.629960777  | 0.002911634 |
| mir-151a-3p   | mir-107       | -0.033917737 | 0.887113173 | -0.274295634 | 0.24187302  |
| mir-122-5p    | mir-126-5p    | -0.190145583 | 0.421992749 | 0.054987352  | 0.817897138 |
| mir-423-3p    | mir-194-2-5p  | -0.592697164 | 0.005887819 | -0.408908888 | 0.073428625 |
| mir-423-3p    | mir-194-1-5p  | -0.592697164 | 0.005887819 | -0.408908888 | 0.073428625 |
| mir-16-2-5p   | mir-223-3p    | -0.099254451 | 0.677169317 | -0.333737192 | 0.150425608 |
| mir-223-3p    | mir-16-1-5p   | -0.099254451 | 0.677169317 | -0.333737192 | 0.150425608 |
| let-7f-2-5p   | mir-92a-2-3p  | -0.725941134 | 0.000290653 | -0.823463709 | 8.17E-06    |
| let-7f-2-5p   | mir-92a-1-3p  | -0.725941134 | 0.000290653 | -0.823463709 | 8.17E-06    |
| mir-92a-2-3p  | let-7f-1-5p   | -0.725941134 | 0.000290653 | -0.823463709 | 8.17E-06    |
| let-7f-1-5p   | mir-92a-1-3p  | -0.725941134 | 0.000290653 | -0.823463709 | 8.17E-06    |
| mir-194-2-5p  | mir-148a-3p   | 0.471950994  | 0.035644325 | 0.259557599  | 0.269111535 |
| mir-148a-3p   | mir-194-1-5p  | 0.471950994  | 0.035644325 | 0.259557599  | 0.269111535 |
| mir-125b-1-5p | mir-30a-5p    | 0.464032992  | 0.039303355 | 0.634742171  | 0.002642997 |
| mir-30a-5p    | mir-125b-2-5p | 0.464032992  | 0.039303355 | 0.634742171  | 0.002642997 |
| mir-150-5p    | mir-363-3p    | 0.172836549  | 0.466190929 | 0.398098214  | 0.082139082 |
| mir-423-3p    | mir-425-5p    | -0.167462337 | 0.480374549 | 0.077537398  | 0.745241757 |
| mir-126-5p    | copeptin      | -0.141210485 | 0.552620435 | -0.370402594 | 0.107918904 |
| mir-122-5p    | mir-28-3p     | 0.10155795   | 0.67007795  | 0.334905637  | 0.148914287 |
| mir-125a-5p   | let-7b-5p     | -0.732447782 | 0.000240383 | -0.59665553  | 0.005485189 |
| mir-24-2-3p   | let-7g-5p     | 0.084637887  | 0.722756262 | 0.319234854  | 0.170078459 |
| let-7g-5p     | mir-24-1-3p   | 0.084637887  | 0.722756262 | 0.319234854  | 0.170078459 |
| mir-26a-2-5p  | mir-199a-2-3p | 0.932491114  | 2.16E-09    | 0.892095104  | 1.27E-07    |
| mir-26a-2-5p  | mir-199a-1-3p | 0.932491114  | 2.16E-09    | 0.892095104  | 1.27E-07    |
| mir-26a-2-5p  | mir-199b-3p   | 0.932491114  | 2.16E-09    | 0.892095104  | 1.27E-07    |
| mir-199a-2-3p | mir-26a-1-5p  | 0.932491114  | 2.16E-09    | 0.892095104  | 1.27E-07    |
| mir-199a-1-3p | mir-26a-1-5p  | 0.932491114  | 2.16E-09    | 0.892095104  | 1.27E-07    |
| mir-199b-3p   | mir-26a-1-5p  | 0.932491114  | 2.16E-09    | 0.892095104  | 1.27E-07    |
| mir-375       | copeptin      | -0.117078514 | 0.623020747 | -0.347548873 | 0.133234002 |
| mir-15a-5p    | mir-378a-3p   | 0.639665687  | 0.002388287 | 0.472065948  | 0.035593231 |
| mir-126-5p    | let-7d-3p     | 0.540850918  | 0.013802458 | 0.691160385  | 0.00073894  |
| mir-192-5p    | mir-744-5p    | -0.611132867 | 0.004200484 | -0.434940875 | 0.055297413 |
| mir-101-1-3p  | mir-584-5p    | -0.319481456 | 0.169730286 | -0.519610734 | 0.018868279 |
| mir-584-5p    | mir-101-2-3p  | -0.319481456 | 0.169730286 | -0.519610734 | 0.018868279 |
| mir-146a-5p   | mir-139-5p    | 0.750801521  | 0.000136535 | 0.839463087  | 3.70E-06    |
| mir-224-5p    | mir-199a-2-3p | 0.586242326  | 0.006596305 | 0.724181131  | 0.000305699 |
| mir-224-5p    | mir-199a-1-3p | 0.586242326  | 0.006596305 | 0.724181131  | 0.000305699 |
| mir-224-5p    | mir-199b-3p   | 0.586242326  | 0.006596305 | 0.724181131  | 0.000305699 |
| mir-98-5p     | mir-27a-3p    | 0.052619613  | 0.825620522 | 0.288658323  | 0.217098314 |
| mir-744-5p    | mir-451a      | -0.579089529 | 0.007461566 | -0.718886179 | 0.000355034 |
| mir-1307-3p   | let-7d-3p     | 0.431659942  | 0.057372682 | 0.608253444  | 0.00443387  |
| mir-106a-5p   | mir-484       | 0.647935659  | 0.002006614 | 0.483691882  | 0.03071328  |
| mir-27b-3p    | mir-128-1-3p  | 0.611291404  | 0.004187936 | 0.741972054  | 0.00018027  |
| mir-27b-3p    | mir-128-2-3p  | 0.611291404  | 0.004187936 | 0.741972054  | 0.00018027  |
| mir-151a-5p   | mir-186-5p    | -0.167283958 | 0.480848979 | 0.074771177  | 0.754056797 |
| mir-16-2-5p   | mir-27a-3p    | 0.649467614  | 0.001941848 | 0.485869502  | 0.029860629 |

|               |               |              |             |              |             |
|---------------|---------------|--------------|-------------|--------------|-------------|
| mir-16-1-5p   | mir-27a-3p    | 0.649467614  | 0.001941848 | 0.485869502  | 0.029860629 |
| mir-223-3p    | let-7g-5p     | 0.217672084  | 0.356580375 | 0.434104721  | 0.05582079  |
| mir-181a-2-5p | mir-423-3p    | 0.594359405  | 0.005715881 | 0.729639895  | 0.000261081 |
| mir-423-3p    | mir-181a-1-5p | 0.594359405  | 0.005715881 | 0.729639895  | 0.000261081 |
| mir-98-5p     | mir-20a-5p    | -0.002271162 | 0.992417898 | -0.240899715 | 0.306243611 |
| mir-584-5p    | mir-107       | -0.181676983 | 0.443330073 | -0.402846253 | 0.07822396  |
| mir-10b-5p    | mir-375       | 0.648410419  | 0.001986352 | 0.768148386  | 7.64E-05    |
| mir-151a-3p   | mir-99a-5p    | 0.280463368  | 0.231020842 | 0.486412361  | 0.029650992 |
| mir-16-2-5p   | mir-30c-1-5p  | -0.42692775  | 0.060469386 | -0.21008238  | 0.374001964 |
| mir-16-2-5p   | mir-30c-2-5p  | -0.42692775  | 0.060469386 | -0.21008238  | 0.374001964 |
| mir-30c-1-5p  | mir-16-1-5p   | -0.42692775  | 0.060469386 | -0.21008238  | 0.374001964 |
| mir-16-1-5p   | mir-30c-2-5p  | -0.42692775  | 0.060469386 | -0.21008238  | 0.374001964 |
| let-7b-5p     | let-7g-5p     | 0.492841131  | 0.027255184 | 0.288526214  | 0.217318277 |
| mir-151a-3p   | mir-378a-3p   | 0.118679932  | 0.618240668 | -0.122633902 | 0.606501818 |
| mir-146a-5p   | mir-224-5p    | 0.561257086  | 0.010028821 | 0.704981203  | 0.00051799  |
| mir-148a-3p   | mir-484       | 0.004368056  | 0.985418117 | 0.241914142  | 0.304148763 |
| mir-30e-5p    | mir-185-5p    | 0.916146307  | 1.43E-08    | 0.867304579  | 7.41E-07    |
| mir-19b-2-3p  | copeptin      | 0.095671647  | 0.688251023 | -0.145369988 | 0.540857735 |
| mir-19b-1-3p  | copeptin      | 0.095671647  | 0.688251023 | -0.145369988 | 0.540857735 |
| mir-30c-1-5p  | mir-28-3p     | 0.467045168  | 0.037878586 | 0.634253799  | 0.002669451 |
| mir-30c-2-5p  | mir-28-3p     | 0.467045168  | 0.037878586 | 0.634253799  | 0.002669451 |
| mir-144-3p    | mir-21-5p     | -0.306365888 | 0.188931074 | -0.507046024 | 0.022501587 |
| mir-30a-5p    | norepi        | -0.253503179 | 0.280836448 | -0.017110275 | 0.942947483 |
| mir-3615      | mir-21-5p     | -0.527018313 | 0.016956272 | -0.67935053  | 0.000986483 |
| let-7i-5p     | mir-10b-5p    | -0.256610991 | 0.274778942 | -0.020640486 | 0.931170562 |
| mir-361-5p    | mir-425-5p    | -0.24922339  | 0.28931274  | -0.013080874 | 0.956349807 |
| mir-222-3p    | mir-486-2-5p  | 0.740981116  | 0.000185854 | 0.831831797  | 5.45E-06    |
| mir-320a      | mir-23a-3p    | -0.189888013 | 0.422633481 | -0.408279516 | 0.073915959 |
| mir-151a-3p   | copeptin      | -0.078066253 | 0.743559898 | -0.309059383 | 0.18487361  |
| let-7a-3-5p   | mir-106b-3p   | -0.385826774 | 0.092928193 | -0.570434128 | 0.008630535 |
| let-7a-2-5p   | mir-106b-3p   | -0.385826774 | 0.092928193 | -0.570434128 | 0.008630535 |
| let-7a-1-5p   | mir-106b-3p   | -0.385826774 | 0.092928193 | -0.570434128 | 0.008630535 |
| mir-10b-5p    | mir-224-5p    | 0.350523083  | 0.129721908 | 0.124425926  | 0.601211711 |
| mir-543       | mir-375       | -0.056489837 | 0.813004464 | 0.182272501  | 0.441811479 |
| mir-17-5p     | mir-15b-5p    | 0.780976743  | 4.82E-05    | 0.858674015  | 1.26E-06    |
| mir-144-3p    | mir-340-5p    | -0.138124991 | 0.561419286 | -0.362054823 | 0.116725196 |
| mir-361-5p    | mir-221-3p    | 0.89249983   | 1.23E-07    | 0.932112062  | 2.27E-09    |
| mir-101-1-3p  | mir-224-5p    | 0.129212516  | 0.587175954 | -0.109770693 | 0.645016281 |
| mir-224-5p    | mir-101-2-3p  | 0.129212516  | 0.587175954 | -0.109770693 | 0.645016281 |
| mir-223-3p    | mir-320a      | -0.099286486 | 0.677070517 | -0.327264801 | 0.15899092  |
| mir-25-3p     | cpeptide      | -0.17032763  | 0.472785867 | 0.067949354  | 0.775919193 |
| mir-16-2-5p   | mir-374b-5p   | 0.04343355   | 0.855724939 | -0.194060284 | 0.412318833 |
| mir-374b-5p   | mir-16-1-5p   | 0.04343355   | 0.855724939 | -0.194060284 | 0.412318833 |
| mir-182-5p    | cpeptide      | -0.062869235 | 0.79230689  | 0.175212711  | 0.459988282 |
| mir-151a-5p   | mir-15b-5p    | 0.278273332  | 0.234837388 | 0.482142878  | 0.031331322 |
| mir-224-5p    | mir-486-2-5p  | -0.004894593 | 0.98366059  | -0.239882617 | 0.308352724 |
| mir-199a-1-5p | mir-425-5p    | -0.245108406 | 0.2976094   | -0.010464766 | 0.965073888 |
| mir-425-5p    | mir-199a-2-5p | -0.245108406 | 0.2976094   | -0.010464766 | 0.965073888 |
| mir-29a-3p    | mir-128-1-3p  | 0.23142294   | 0.326233838 | 0.442543092  | 0.050708603 |
| mir-29a-3p    | mir-128-2-3p  | 0.23142294   | 0.326233838 | 0.442543092  | 0.050708603 |
| mir-99b-5p    | mir-30e-5p    | -0.436571581 | 0.05428745  | -0.224714957 | 0.340840345 |
| mir-486-2-5p  | mir-99b-5p    | -0.578979095 | 0.007475619 | -0.398379918 | 0.081902825 |
| mir-1307-3p   | mir-30a-5p    | 0.319912922  | 0.169122283 | 0.092213239  | 0.699006327 |
| mir-125a-5p   | mir-107       | -0.573682955 | 0.008175416 | -0.391808042 | 0.087546883 |
| mir-423-3p    | mir-30c-1-5p  | 0.783788177  | 4.34E-05    | 0.67292555   | 0.001148296 |
| mir-423-3p    | mir-30c-2-5p  | 0.783788177  | 4.34E-05    | 0.67292555   | 0.001148296 |
| mir-222-3p    | mir-20b-5p    | 0.713645502  | 0.000410385 | 0.812241375  | 1.36E-05    |
| mir-140-5p    | mir-423-5p    | 0.740253439  | 0.000190048 | 0.611956322  | 0.004135642 |
| mir-92a-2-3p  | mir-320a      | 0.497339184  | 0.02567157  | 0.297518059  | 0.202679708 |
| mir-320a      | mir-92a-1-3p  | 0.497339184  | 0.02567157  | 0.297518059  | 0.202679708 |
| mir-224-5p    | mir-221-3p    | 0.548044226  | 0.012360101 | 0.693424309  | 0.000698075 |
| mir-1307-3p   | mir-484       | -0.50637862  | 0.02270907  | -0.308559081 | 0.18562277  |
| mir-98-5p     | copeptin      | -0.306335864 | 0.188976638 | -0.077504365 | 0.745346846 |
| mir-26a-2-5p  | mir-30a-5p    | 0.054950799  | 0.818016251 | 0.285523439  | 0.22235748  |

|               |               |              |             |              |             |
|---------------|---------------|--------------|-------------|--------------|-------------|
| mir-30a-5p    | mir-26a-1-5p  | 0.054950799  | 0.818016251 | 0.285523439  | 0.22235748  |
| let-7a-3-5p   | mir-486-2-5p  | -0.305267183 | 0.190603243 | -0.503487503 | 0.023625448 |
| let-7a-2-5p   | mir-486-2-5p  | -0.305267183 | 0.190603243 | -0.503487503 | 0.023625448 |
| let-7a-1-5p   | mir-486-2-5p  | -0.305267183 | 0.190603243 | -0.503487503 | 0.023625448 |
| mir-103a-2-3p | mir-140-5p    | 0.769406132  | 7.32E-05    | 0.652849776  | 0.001805034 |
| mir-140-5p    | mir-103a-1-3p | 0.769406132  | 7.32E-05    | 0.652849776  | 0.001805034 |
| mir-143-3p    | norepi        | -0.377518117 | 0.100800471 | -0.15739893  | 0.507499973 |
| let-7f-2-5p   | mir-199a-2-3p | 0.85237679   | 1.83E-06    | 0.905716064  | 3.95E-08    |
| let-7f-2-5p   | mir-199a-1-3p | 0.85237679   | 1.83E-06    | 0.905716064  | 3.95E-08    |
| let-7f-2-5p   | mir-199b-3p   | 0.85237679   | 1.83E-06    | 0.905716064  | 3.95E-08    |
| mir-199a-2-3p | let-7f-1-5p   | 0.85237679   | 1.83E-06    | 0.905716064  | 3.95E-08    |
| mir-199a-1-3p | let-7f-1-5p   | 0.85237679   | 1.83E-06    | 0.905716064  | 3.95E-08    |
| let-7f-1-5p   | mir-199b-3p   | 0.85237679   | 1.83E-06    | 0.905716064  | 3.95E-08    |
| let-7i-5p     | mir-532-5p    | 0.245431973  | 0.296951813 | 0.012647309  | 0.957795336 |
| mir-26a-2-5p  | let-7b-5p     | -0.462898733 | 0.039850498 | -0.628430361 | 0.003002272 |
| let-7b-5p     | mir-26a-1-5p  | -0.462898733 | 0.039850498 | -0.628430361 | 0.003002272 |
| mir-98-5p     | mir-186-5p    | -0.019935492 | 0.933516423 | -0.252120202 | 0.283558458 |
| mir-140-5p    | mir-451a      | 0.432030304  | 0.057135503 | 0.221247864  | 0.348537358 |
| mir-340-5p    | mir-10a-5p    | 0.191211066  | 0.41934779  | 0.406147386  | 0.07558486  |
| mir-23a-3p    | mir-363-3p    | -0.367458877 | 0.110967607 | -0.552911565 | 0.011455156 |
| mir-223-3p    | mir-15b-5p    | 0.38576548   | 0.092984565 | 0.567531385  | 0.009054451 |
| mir-361-5p    | mir-192-5p    | -0.531141581 | 0.015961236 | -0.340543443 | 0.141770824 |
| mir-140-5p    | mir-363-3p    | 0.470838863  | 0.036141591 | 0.267505617  | 0.254192902 |
| mir-361-5p    | mir-25-3p     | -0.485840923 | 0.029871697 | -0.645509194 | 0.002112891 |
| let-7f-2-5p   | let-7i-5p     | 0.533918442  | 0.01531793  | 0.681790098  | 0.000930307 |
| let-7i-5p     | let-7f-1-5p   | 0.533918442  | 0.01531793  | 0.681790098  | 0.000930307 |
| mir-7-3-5p    | mir-320a      | 0.91748287   | 1.24E-08    | 0.870734234  | 5.93E-07    |
| mir-7-1-5p    | mir-320a      | 0.91748287   | 1.24E-08    | 0.870734234  | 5.93E-07    |
| mir-320a      | mir-7-2-5p    | 0.91748287   | 1.24E-08    | 0.870734234  | 5.93E-07    |
| mir-1307-3p   | mir-486-2-5p  | -0.691304619 | 0.000736277 | -0.795836562 | 2.72E-05    |
| mir-1307-3p   | mir-199a-1-5p | 0.504375054  | 0.023341066 | 0.659429721  | 0.001561919 |
| mir-1307-3p   | mir-199a-2-5p | 0.504375054  | 0.023341066 | 0.659429721  | 0.001561919 |
| mir-101-1-3p  | mir-128-1-3p  | 0.194976715  | 0.41007167  | -0.039007264 | 0.870302103 |
| mir-101-1-3p  | mir-128-2-3p  | 0.194976715  | 0.41007167  | -0.039007264 | 0.870302103 |
| mir-128-1-3p  | mir-101-2-3p  | 0.194976715  | 0.41007167  | -0.039007264 | 0.870302103 |
| mir-128-2-3p  | mir-101-2-3p  | 0.194976715  | 0.41007167  | -0.039007264 | 0.870302103 |
| mir-150-5p    | norepi        | -0.41477337  | 0.069002299 | -0.202023389 | 0.39301643  |
| mir-451a      | cpeptide      | -0.08677198  | 0.716039729 | 0.148329306  | 0.532559345 |
| mir-375       | mir-23a-3p    | 0.527530395  | 0.01683006  | 0.336698486  | 0.146615974 |
| mir-27b-3p    | mir-185-5p    | -0.185351053 | 0.434004619 | -0.400144954 | 0.080433985 |
| mir-199a-1-5p | mir-30e-5p    | -0.256213634 | 0.275548858 | -0.025867375 | 0.913796405 |
| mir-30e-5p    | mir-199a-2-5p | -0.256213634 | 0.275548858 | -0.025867375 | 0.913796405 |
| mir-320a      | mir-484       | 0.809202032  | 1.56E-05    | 0.710749262  | 0.000444008 |
| mir-3615      | let-7g-5p     | 0.385140011  | 0.093561238 | 0.168554916  | 0.477473739 |
| mir-26b-5p    | mir-15a-5p    | 0.886782542  | 1.91E-07    | 0.824599089  | 7.75E-06    |
| mir-26b-5p    | mir-374b-5p   | 0.095098113  | 0.690030741 | -0.139235358 | 0.558245752 |
| mir-106a-5p   | let-7b-5p     | 0.924335662  | 5.85E-09    | 0.952072295  | 1.06E-10    |
| mir-192-5p    | mir-423-5p    | 0.613720213  | 0.00399953  | 0.445896652  | 0.048779506 |
| mir-374b-5p   | mir-23a-3p    | 0.563385801  | 0.009689133 | 0.702669395  | 0.000550448 |
| norepi        | cpeptide      | -0.391831695 | 0.087526068 | -0.177562376 | 0.453896572 |
| let-7f-2-5p   | mir-99b-5p    | 0.808621514  | 1.60E-05    | 0.71069181   | 0.000444698 |
| mir-99b-5p    | let-7f-1-5p   | 0.808621514  | 1.60E-05    | 0.71069181   | 0.000444698 |
| mir-425-5p    | mir-148a-3p   | 0.032007257  | 0.893436008 | 0.260027537  | 0.268214503 |
| mir-744-5p    | mir-425-5p    | -0.357315524 | 0.121948256 | -0.138808625 | 0.55946445  |
| mir-126-3p    | mir-128-1-3p  | 0.781174332  | 4.78E-05    | 0.857130212  | 1.39E-06    |
| mir-126-3p    | mir-128-2-3p  | 0.781174332  | 4.78E-05    | 0.857130212  | 1.39E-06    |
| mir-16-2-5p   | mir-181a-2-5p | 0.089282098  | 0.708165406 | -0.143421818 | 0.546352723 |
| mir-16-2-5p   | mir-181a-1-5p | 0.089282098  | 0.708165406 | -0.143421818 | 0.546352723 |
| mir-181a-2-5p | mir-16-1-5p   | 0.089282098  | 0.708165406 | -0.143421818 | 0.546352723 |
| mir-16-1-5p   | mir-181a-1-5p | 0.089282098  | 0.708165406 | -0.143421818 | 0.546352723 |
| mir-103a-2-3p | norepi        | 0.586549834  | 0.006561038 | 0.412744292  | 0.070510511 |
| mir-103a-1-3p | norepi        | 0.586549834  | 0.006561038 | 0.412744292  | 0.070510511 |
| mir-20a-5p    | copeptin      | 0.017053741  | 0.943110718 | -0.212877062 | 0.367531859 |
| mir-139-5p    | mir-363-3p    | -0.200750948 | 0.396066708 | -0.410901196 | 0.07190176  |



|               |               |              |             |              |             |
|---------------|---------------|--------------|-------------|--------------|-------------|
| mir-27b-3p    | mir-425-5p    | -0.209468902 | 0.37543082  | 0.020537588  | 0.931512919 |
| mir-1307-3p   | mir-363-3p    | -0.704937742 | 0.000518585 | -0.804082954 | 1.94E-05    |
| mir-144-3p    | mir-3615      | 0.871362748  | 5.69E-07    | 0.802550644  | 2.06E-05    |
| mir-3615      | mir-199a-1-5p | -0.59891082  | 0.005266115 | -0.727979372 | 0.000274022 |
| mir-3615      | mir-199a-2-5p | -0.59891082  | 0.005266115 | -0.727979372 | 0.000274022 |
| mir-15a-5p    | cpeptide      | -0.057863999 | 0.808535491 | 0.173250882  | 0.465106324 |
| mir-7-3-5p    | mir-23a-3p    | -0.314450842 | 0.176929878 | -0.506801248 | 0.022577508 |
| mir-7-1-5p    | mir-23a-3p    | -0.314450842 | 0.176929878 | -0.506801248 | 0.022577508 |
| mir-7-2-5p    | mir-23a-3p    | -0.314450842 | 0.176929878 | -0.506801248 | 0.022577508 |
| mir-22-3p     | mir-99b-5p    | -0.523236252 | 0.017912072 | -0.334555693 | 0.149365806 |
| mir-150-5p    | cpeptide      | 0.37522895   | 0.10305219  | 0.160362347  | 0.499436737 |
| let-7f-2-5p   | mir-25-3p     | -0.355026336 | 0.124529986 | -0.53978911  | 0.014026396 |
| mir-25-3p     | let-7f-1-5p   | -0.355026336 | 0.124529986 | -0.53978911  | 0.014026396 |
| let-7f-2-5p   | mir-3615      | -0.542587767 | 0.013442368 | -0.686045094 | 0.000838784 |
| mir-3615      | let-7f-1-5p   | -0.542587767 | 0.013442368 | -0.686045094 | 0.000838784 |
| mir-7-3-5p    | mir-423-3p    | -0.448017012 | 0.047589147 | -0.613632276 | 0.004006227 |
| mir-423-3p    | mir-7-1-5p    | -0.448017012 | 0.047589147 | -0.613632276 | 0.004006227 |
| mir-423-3p    | mir-7-2-5p    | -0.448017012 | 0.047589147 | -0.613632276 | 0.004006227 |
| mir-629-5p    | let-7b-5p     | 0.937129404  | 1.16E-09    | 0.90175114   | 5.64E-08    |
| mir-363-3p    | cpeptide      | -0.092666986 | 0.697592018 | 0.13851118   | 0.560314616 |
| mir-199a-1-5p | mir-375       | -0.07541262  | 0.752010076 | -0.298515935 | 0.201096712 |
| mir-375       | mir-199a-2-5p | -0.07541262  | 0.752010076 | -0.298515935 | 0.201096712 |
| mir-378a-3p   | mir-185-5p    | 0.768727623  | 7.49E-05    | 0.655515054  | 0.001702995 |
| mir-19b-2-3p  | mir-101-1-3p  | 0.928916335  | 3.39E-09    | 0.954724508  | 6.44E-11    |
| mir-19b-2-3p  | mir-101-2-3p  | 0.928916335  | 3.39E-09    | 0.954724508  | 6.44E-11    |
| mir-101-1-3p  | mir-19b-1-3p  | 0.928916335  | 3.39E-09    | 0.954724508  | 6.44E-11    |
| mir-19b-1-3p  | mir-101-2-3p  | 0.928916335  | 3.39E-09    | 0.954724508  | 6.44E-11    |
| mir-194-2-5p  | mir-139-5p    | -0.277620359 | 0.235983161 | -0.053066503 | 0.824161597 |
| mir-194-1-5p  | mir-139-5p    | -0.277620359 | 0.235983161 | -0.053066503 | 0.824161597 |
| mir-24-2-3p   | mir-30c-1-5p  | 0.786016955  | 3.99E-05    | 0.679935971  | 0.000972747 |
| mir-24-2-3p   | mir-30c-2-5p  | 0.786016955  | 3.99E-05    | 0.679935971  | 0.000972747 |
| mir-30c-1-5p  | mir-24-1-3p   | 0.786016955  | 3.99E-05    | 0.679935971  | 0.000972747 |
| mir-24-1-3p   | mir-30c-2-5p  | 0.786016955  | 3.99E-05    | 0.679935971  | 0.000972747 |
| mir-3615      | mir-30d-5p    | -0.179714449 | 0.448353844 | -0.391523425 | 0.087797625 |
| mir-423-5p    | let-7b-5p     | 0.662557095  | 0.001456387 | 0.512122528  | 0.020972171 |

Col 1 and 2. Col 3 and 4, magnitude and significance of correlation at 14degrees; col 5 and magnitude of correlations; col 9-11, local FDR estimates at 14 degrees, RT and

| p (difference) | (r1-r2)      | lfdr (in cond. 1) | lfdr (in cond. 2) | lfdr (difference) |
|----------------|--------------|-------------------|-------------------|-------------------|
| 0.000118006    | -0.445717786 | 0.134257478       | 6.53E-09          | 0.423840643       |
| 0.000118006    | -0.445717786 | 0.134257478       | 6.53E-09          | 0.423840643       |
| 0.000311075    | -0.342237534 | 0.035148121       | 3.90E-09          | 0.741428628       |
| 0.000311075    | -0.342237534 | 0.035148121       | 3.90E-09          | 0.741428628       |
| 0.000311075    | -0.342237534 | 0.035148121       | 3.90E-09          | 0.741428628       |
| 0.000489904    | -0.484369549 | 0.205025676       | 9.79E-08          | 0.741428628       |
| 0.00070924     | 0.140726698  | 2.11E-11          | 4.69E-05          | 0.741428628       |
| 0.000899487    | -0.760668676 | 1                 | 6.41E-05          | 0.741428628       |
| 0.001186775    | -0.2060563   | 0.001207877       | 5.82E-10          | 0.741428628       |
| 0.001243181    | -0.340391104 | 0.03951775        | 1.63E-08          | 0.741428628       |
| 0.001243181    | -0.340391104 | 0.03951775        | 1.63E-08          | 0.741428628       |
| 0.001287518    | -0.474253276 | 0.241457119       | 2.98E-07          | 0.741428628       |
| 0.001421453    | -0.370820852 | 0.073031096       | 5.53E-08          | 0.741428628       |
| 0.00146212     | -0.73400065  | 1                 | 0.000115129       | 0.741428628       |
| 0.001552749    | -0.359839449 | 0.043105813       | 5.53E-08          | 0.741428628       |
| 0.001723805    | 0.932136584  | 0.584854032       | 0.011906673       | 0.741428628       |
| 0.001723805    | 0.932136584  | 0.584854032       | 0.011906673       | 0.741428628       |
| 0.001887178    | -0.418112268 | 0.146615922       | 2.98E-07          | 0.846566334       |
| 0.001887178    | -0.418112268 | 0.146615922       | 2.98E-07          | 0.846566334       |
| 0.00283729     | -0.445993259 | 0.205025676       | 8.55E-07          | 0.846566334       |
| 0.00283729     | -0.445993259 | 0.205025676       | 8.55E-07          | 0.846566334       |
| 0.002852146    | -0.486015965 | 0.307400178       | 3.06E-06          | 0.846566334       |
| 0.003422478    | -0.436813783 | 0.19926681        | 8.55E-07          | 0.846566334       |
| 0.003601256    | -0.276711722 | 0.018163994       | 1.63E-08          | 0.846566334       |
| 0.003601256    | -0.276711722 | 0.018163994       | 1.63E-08          | 0.846566334       |
| 0.003742635    | -0.292705999 | 0.025193624       | 4.93E-08          | 0.846566334       |
| 0.004167558    | -0.90719948  | 0.412603306       | 0.10273905        | 0.846566334       |
| 0.004759743    | -0.782552167 | 1                 | 0.003736177       | 0.846566334       |
| 0.005229788    | -0.88329352  | 0.095538718       | 0.397942841       | 0.846566334       |
| 0.005229788    | -0.88329352  | 0.095538718       | 0.397942841       | 0.846566334       |
| 0.005313955    | -0.888956996 | 0.307400178       | 0.145037597       | 0.846566334       |
| 0.005339237    | -0.888841986 | 0.295435331       | 0.145037597       | 0.846566334       |
| 0.005339237    | -0.888841986 | 0.295435331       | 0.145037597       | 0.846566334       |
| 0.005424989    | -0.410498941 | 0.169239932       | 8.55E-07          | 0.846566334       |
| 0.005424989    | -0.410498941 | 0.169239932       | 8.55E-07          | 0.846566334       |
| 0.005459295    | -0.434063142 | 0.205025676       | 3.06E-06          | 0.846566334       |
| 0.005762655    | 0.097653448  | 1.75E-10          | 4.11E-06          | 0.846566334       |
| 0.005762655    | 0.097653448  | 1.75E-10          | 4.11E-06          | 0.846566334       |
| 0.00582768     | -0.754089043 | 1                 | 0.002721298       | 0.846566334       |
| 0.005934671    | -0.371067933 | 0.095006685       | 5.53E-07          | 0.846566334       |
| 0.006240705    | -0.85045786  | 0.584854032       | 0.049298372       | 0.846566334       |
| 0.006267425    | 0.711051115  | 1                 | 0.001791344       | 0.846566334       |
| 0.006648292    | 0.598074371  | 0.737584497       | 0.000124759       | 0.846566334       |
| 0.007268796    | -0.81893321  | 0.737584497       | 0.025431136       | 0.846566334       |
| 0.007268796    | -0.81893321  | 0.737584497       | 0.025431136       | 0.846566334       |
| 0.007371932    | -0.545393543 | 0.584854032       | 4.69E-05          | 0.846566334       |
| 0.007449132    | 0.527292497  | 0.439859057       | 4.69E-05          | 0.846566334       |
| 0.007449132    | 0.527292497  | 0.439859057       | 4.69E-05          | 0.846566334       |
| 0.007449132    | 0.527292497  | 0.439859057       | 4.69E-05          | 0.846566334       |
| 0.007463437    | -0.847874581 | 0.439859057       | 0.085309726       | 0.846566334       |
| 0.007463437    | -0.847874581 | 0.439859057       | 0.085309726       | 0.846566334       |
| 0.007673366    | 0.855456405  | 0.295435331       | 0.242167012       | 0.846566334       |
| 0.007762788    | 0.796044823  | 1                 | 0.02341474        | 0.846566334       |
| 0.007762788    | 0.796044823  | 1                 | 0.02341474        | 0.846566334       |
| 0.008234545    | 0.570442161  | 0.584854032       | 0.000115129       | 0.846566334       |
| 0.008234545    | 0.570442161  | 0.584854032       | 0.000115129       | 0.846566334       |
| 0.008234545    | 0.570442161  | 0.584854032       | 0.000115129       | 0.846566334       |
| 0.008234545    | 0.570442161  | 0.584854032       | 0.000115129       | 0.846566334       |
| 0.008431408    | -0.815418662 | 0.737584497       | 0.042826979       | 0.846566334       |

|             |              |             |             |             |
|-------------|--------------|-------------|-------------|-------------|
| 0.008431408 | -0.815418662 | 0.737584497 | 0.042826979 | 0.846566334 |
| 0.008431408 | -0.815418662 | 0.737584497 | 0.042826979 | 0.846566334 |
| 0.008431408 | -0.815418662 | 0.737584497 | 0.042826979 | 0.846566334 |
| 0.008431408 | -0.815418662 | 0.737584497 | 0.042826979 | 0.846566334 |
| 0.008431408 | -0.815418662 | 0.737584497 | 0.042826979 | 0.846566334 |
| 0.00858711  | -0.824900677 | 0.584854032 | 0.060775899 | 0.846566334 |
| 0.00858711  | -0.824900677 | 0.584854032 | 0.060775899 | 0.846566334 |
| 0.00858711  | -0.824900677 | 0.584854032 | 0.060775899 | 0.846566334 |
| 0.008619669 | -0.183019104 | 0.0008771   | 4.73E-09    | 0.846566334 |
| 0.008978131 | -0.234015587 | 0.008580492 | 2.24E-08    | 0.846566334 |
| 0.008978131 | -0.234015587 | 0.008580492 | 2.24E-08    | 0.846566334 |
| 0.009828255 | -0.41874855  | 0.205025676 | 4.11E-06    | 0.846566334 |
| 0.009828255 | -0.41874855  | 0.205025676 | 4.11E-06    | 0.846566334 |
| 0.009921286 | 0.278405684  | 9.36E-08    | 0.011906673 | 0.846566334 |
| 0.010009409 | 0.797531722  | 0.043105813 | 0.704162183 | 0.846566334 |
| 0.010033486 | -0.352266952 | 0.075374611 | 8.55E-07    | 0.846566334 |
| 0.010496845 | 0.655505677  | 1           | 0.001791344 | 0.846566334 |
| 0.010615945 | -0.654656587 | 1           | 0.001791344 | 0.846566334 |
| 0.010717826 | -0.816407116 | 0.439859057 | 0.126792252 | 0.846566334 |
| 0.010807515 | -0.81839852  | 0.439859057 | 0.145037597 | 0.846566334 |
| 0.010807515 | -0.81839852  | 0.439859057 | 0.145037597 | 0.846566334 |
| 0.010920573 | 0.635308     | 1           | 0.001090387 | 0.846566334 |
| 0.011258021 | -0.49970723  | 0.439859057 | 4.69E-05    | 0.846566334 |
| 0.011857537 | -0.813232707 | 0.349433107 | 0.242167012 | 0.846566334 |
| 0.011857537 | -0.813232707 | 0.349433107 | 0.242167012 | 0.846566334 |
| 0.012196624 | -0.262945551 | 0.018163994 | 9.79E-08    | 0.846566334 |
| 0.012196624 | -0.262945551 | 0.018163994 | 9.79E-08    | 0.846566334 |
| 0.012196624 | -0.262945551 | 0.018163994 | 9.79E-08    | 0.846566334 |
| 0.012369    | -0.382275377 | 0.146615922 | 3.66E-06    | 0.846566334 |
| 0.012706877 | -0.803540434 | 0.205025676 | 0.397942841 | 0.846566334 |
| 0.012829923 | 0.779259297  | 0.075374611 | 0.704162183 | 0.846566334 |
| 0.012843621 | 0.454641905  | 0.412603306 | 4.35E-05    | 0.846566334 |
| 0.013019784 | -0.803444612 | 0.307400178 | 0.272770942 | 0.846566334 |
| 0.013101687 | -0.392500424 | 0.169239932 | 4.11E-06    | 0.846566334 |
| 0.013101687 | -0.392500424 | 0.169239932 | 4.11E-06    | 0.846566334 |
| 0.013150672 | -0.643590555 | 1           | 0.002093839 | 0.846566334 |
| 0.013155434 | -0.772336511 | 0.737584497 | 0.053084396 | 0.846566334 |
| 0.013155434 | -0.772336511 | 0.737584497 | 0.053084396 | 0.846566334 |
| 0.013324875 | -0.79953261  | 0.439859057 | 0.164911511 | 0.846566334 |
| 0.013474815 | 0.285867041  | 4.10E-07    | 0.02341474  | 0.846566334 |
| 0.013533129 | -0.776703107 | 0.737584497 | 0.061934943 | 0.846566334 |
| 0.01355276  | -0.128064457 | 8.53E-05    | 5.82E-10    | 0.846566334 |
| 0.01355276  | -0.128064457 | 8.53E-05    | 5.82E-10    | 0.846566334 |
| 0.013775665 | -0.39295075  | 0.169239932 | 5.99E-06    | 0.846566334 |
| 0.013775665 | -0.39295075  | 0.169239932 | 5.99E-06    | 0.846566334 |
| 0.013775665 | -0.39295075  | 0.169239932 | 5.99E-06    | 0.846566334 |
| 0.013775665 | -0.39295075  | 0.169239932 | 5.99E-06    | 0.846566334 |
| 0.013915868 | 0.584484868  | 0.881481882 | 0.000596242 | 0.846566334 |
| 0.014203875 | -0.514630052 | 0.439859057 | 0.000124759 | 0.846566334 |
| 0.014203875 | -0.514630052 | 0.439859057 | 0.000124759 | 0.846566334 |
| 0.014255918 | 0.509165931  | 0.439859057 | 0.000115129 | 0.846566334 |
| 0.014255918 | 0.509165931  | 0.439859057 | 0.000115129 | 0.846566334 |
| 0.014255918 | 0.509165931  | 0.439859057 | 0.000115129 | 0.846566334 |
| 0.014261904 | -0.305870095 | 0.03951775  | 8.55E-07    | 0.846566334 |
| 0.014261904 | -0.305870095 | 0.03951775  | 8.55E-07    | 0.846566334 |
| 0.014261904 | -0.305870095 | 0.03951775  | 8.55E-07    | 0.846566334 |
| 0.014355842 | -0.404362879 | 0.19926681  | 9.47E-06    | 0.868819888 |
| 0.014841561 | -0.404145982 | 0.205025676 | 9.47E-06    | 0.868819888 |
| 0.015024935 | 0.739575436  | 1           | 0.031639242 | 0.868819888 |
| 0.015251514 | -0.768749812 | 0.691111318 | 0.085309726 | 0.868819888 |
| 0.015254782 | -0.321612999 | 0.043105813 | 8.55E-07    | 0.868819888 |
| 0.015539775 | 0.769506385  | 0.104319013 | 0.704162183 | 0.868819888 |
| 0.015697335 | -0.387764887 | 0.169239932 | 9.47E-06    | 0.868819888 |
| 0.015913062 | -0.782729171 | 0.412603306 | 0.242167012 | 0.868819888 |

|             |              |             |             |             |
|-------------|--------------|-------------|-------------|-------------|
| 0.016364676 | -0.772525511 | 0.584854032 | 0.145037597 | 0.868819888 |
| 0.016466585 | 0.170992008  | 7.89E-09    | 0.000596242 | 0.868819888 |
| 0.016628853 | -0.569866037 | 0.737584497 | 0.000997588 | 0.868819888 |
| 0.016628853 | -0.569866037 | 0.737584497 | 0.000997588 | 0.868819888 |
| 0.016720575 | 0.724975607  | 1           | 0.031639242 | 0.868819888 |
| 0.016720575 | 0.724975607  | 1           | 0.031639242 | 0.868819888 |
| 0.01689805  | 0.775311757  | 0.307400178 | 0.397942841 | 0.868819888 |
| 0.016978524 | -0.772242921 | 0.439859057 | 0.145037597 | 0.868819888 |
| 0.016978524 | -0.772242921 | 0.439859057 | 0.145037597 | 0.868819888 |
| 0.01700799  | 0.766271552  | 0.584854032 | 0.126792252 | 0.868819888 |
| 0.017287876 | 0.31579422   | 0.043105813 | 8.55E-07    | 0.868819888 |
| 0.017287876 | 0.31579422   | 0.043105813 | 8.55E-07    | 0.868819888 |
| 0.017400436 | -0.262173682 | 0.024201521 | 2.98E-07    | 0.868819888 |
| 0.017400436 | -0.262173682 | 0.024201521 | 2.98E-07    | 0.868819888 |
| 0.017400436 | -0.262173682 | 0.024201521 | 2.98E-07    | 0.868819888 |
| 0.017465743 | -0.582604857 | 0.989933981 | 0.001090387 | 0.868819888 |
| 0.017532251 | -0.401966421 | 0.205025676 | 1.04E-05    | 0.868819888 |
| 0.018484948 | 0.559386805  | 0.737584497 | 0.000997588 | 0.868819888 |
| 0.018728452 | 0.279678391  | 1.09E-06    | 0.02341474  | 0.868819888 |
| 0.018983194 | 0.698356747  | 1           | 0.025431136 | 0.868819888 |
| 0.018983194 | 0.698356747  | 1           | 0.025431136 | 0.868819888 |
| 0.019171356 | -0.335563212 | 0.075374611 | 3.16E-06    | 0.868819888 |
| 0.019488065 | 0.350486672  | 0.095538718 | 4.11E-06    | 0.868819888 |
| 0.019488732 | 0.434667065  | 6.77E-05    | 0.242167012 | 0.868819888 |
| 0.019488732 | 0.434667065  | 6.77E-05    | 0.242167012 | 0.868819888 |
| 0.019771113 | 0.755914214  | 0.439859057 | 0.164911511 | 0.868819888 |
| 0.019850037 | 0.758955305  | 0.412603306 | 0.305102445 | 0.868819888 |
| 0.019966005 | 0.279317251  | 0.034012327 | 5.53E-07    | 0.868819888 |
| 0.019966005 | 0.279317251  | 0.034012327 | 5.53E-07    | 0.868819888 |
| 0.020227496 | -0.676579209 | 1           | 0.017403168 | 0.868819888 |
| 0.020432166 | -0.428802398 | 0.307400178 | 4.69E-05    | 0.868819888 |
| 0.020511833 | 0.250450718  | 3.42E-07    | 0.009270366 | 0.868819888 |
| 0.020511833 | 0.250450718  | 3.42E-07    | 0.009270366 | 0.868819888 |
| 0.020511833 | 0.250450718  | 3.42E-07    | 0.009270366 | 0.868819888 |
| 0.020820864 | -0.714254735 | 0.073031096 | 1           | 0.868819888 |
| 0.020867837 | -0.322449243 | 0.070946263 | 3.06E-06    | 0.868819888 |
| 0.021335678 | -0.213444988 | 0.004526275 | 9.27E-08    | 0.868819888 |
| 0.021704517 | 0.733539686  | 0.737584497 | 0.126792252 | 0.868819888 |
| 0.022412281 | 0.628688531  | 0.016023223 | 1           | 0.868819888 |
| 0.022412281 | 0.628688531  | 0.016023223 | 1           | 0.868819888 |
| 0.022412281 | 0.628688531  | 0.016023223 | 1           | 0.868819888 |
| 0.022412281 | 0.628688531  | 0.016023223 | 1           | 0.868819888 |
| 0.022493006 | -0.250515427 | 0.018163994 | 2.98E-07    | 0.868819888 |
| 0.022561691 | 0.743295861  | 0.307400178 | 0.416730107 | 0.868819888 |
| 0.023012791 | 0.549791162  | 0.737584497 | 0.001090387 | 0.868819888 |
| 0.02356695  | -0.326103482 | 0.075374611 | 3.66E-06    | 0.868819888 |
| 0.02356695  | -0.326103482 | 0.075374611 | 3.66E-06    | 0.868819888 |
| 0.023934986 | -0.153020295 | 0.000852046 | 6.53E-09    | 0.868819888 |
| 0.024266901 | 0.73241342   | 0.584854032 | 0.164911511 | 0.868819888 |
| 0.024266901 | 0.73241342   | 0.584854032 | 0.164911511 | 0.868819888 |
| 0.024266901 | 0.73241342   | 0.584854032 | 0.164911511 | 0.868819888 |
| 0.024266901 | 0.73241342   | 0.584854032 | 0.164911511 | 0.868819888 |
| 0.024302879 | -0.364457705 | 0.169239932 | 1.04E-05    | 0.868819888 |
| 0.024670484 | -0.726230574 | 0.584854032 | 0.145037597 | 0.868819888 |
| 0.024670484 | -0.726230574 | 0.584854032 | 0.145037597 | 0.868819888 |
| 0.024670484 | -0.726230574 | 0.584854032 | 0.145037597 | 0.868819888 |
| 0.024670484 | -0.726230574 | 0.584854032 | 0.145037597 | 0.868819888 |
| 0.024777578 | 0.423223868  | 0.307400178 | 6.41E-05    | 0.868819888 |
| 0.025281808 | 0.299729601  | 4.58E-06    | 0.031639242 | 0.868819888 |
| 0.025526216 | -0.479058618 | 0.439859057 | 0.0002997   | 0.868819888 |
| 0.025597818 | -0.353471761 | 0.104319013 | 9.47E-06    | 0.868819888 |
| 0.025597818 | -0.353471761 | 0.104319013 | 9.47E-06    | 0.868819888 |
| 0.025620355 | -0.72514545  | 0.584854032 | 0.164911511 | 0.868819888 |
| 0.025620355 | -0.72514545  | 0.584854032 | 0.164911511 | 0.868819888 |

|             |              |             |             |             |
|-------------|--------------|-------------|-------------|-------------|
| 0.026498871 | -0.69174954  | 1           | 0.060775899 | 0.868819888 |
| 0.026498871 | -0.69174954  | 1           | 0.060775899 | 0.868819888 |
| 0.026678768 | -0.649751936 | 1           | 0.02341474  | 0.868819888 |
| 0.027059731 | 0.551690889  | 0.881481882 | 0.002093839 | 0.868819888 |
| 0.027108172 | -0.719813757 | 0.307400178 | 0.489952655 | 0.868819888 |
| 0.027325748 | -0.692646068 | 1           | 0.066020955 | 0.868819888 |
| 0.027631791 | 0.691910507  | 1           | 0.066020955 | 0.868819888 |
| 0.027857194 | 0.551413059  | 0.881481882 | 0.002093839 | 0.868819888 |
| 0.027899185 | 0.713381949  | 0.205025676 | 0.601859652 | 0.868819888 |
| 0.028395531 | 0.435891431  | 0.000249829 | 0.272770942 | 0.868819888 |
| 0.028395531 | 0.435891431  | 0.000249829 | 0.272770942 | 0.868819888 |
| 0.028420321 | -0.473961327 | 0.439859057 | 0.000324671 | 0.868819888 |
| 0.029290471 | -0.15402175  | 0.0008771   | 1.22E-08    | 0.868819888 |
| 0.029290471 | -0.15402175  | 0.0008771   | 1.22E-08    | 0.868819888 |
| 0.029290471 | -0.15402175  | 0.0008771   | 1.22E-08    | 0.868819888 |
| 0.029353519 | -0.368385176 | 0.169239932 | 2.13E-05    | 0.868819888 |
| 0.029373099 | 0.67807681   | 0.087427713 | 1           | 0.868819888 |
| 0.029394403 | -0.348047255 | 0.104319013 | 1.04E-05    | 0.868819888 |
| 0.029394403 | -0.348047255 | 0.104319013 | 1.04E-05    | 0.868819888 |
| 0.029394403 | -0.348047255 | 0.104319013 | 1.04E-05    | 0.868819888 |
| 0.030113741 | -0.692297427 | 0.881481882 | 0.126792252 | 0.868819888 |
| 0.030224006 | 0.206760978  | 1.10E-07    | 0.002721298 | 0.868819888 |
| 0.0304345   | 0.166944235  | 4.36E-08    | 0.000596242 | 0.868819888 |
| 0.030779528 | 0.223125812  | 4.10E-07    | 0.005827837 | 0.868819888 |
| 0.030779528 | 0.223125812  | 4.10E-07    | 0.005827837 | 0.868819888 |
| 0.030840459 | -0.667255698 | 0.075374611 | 1           | 0.868819888 |
| 0.030857552 | 0.707929234  | 0.439859057 | 0.305102445 | 0.868819888 |
| 0.030857552 | 0.707929234  | 0.439859057 | 0.305102445 | 0.868819888 |
| 0.031033376 | -0.331595241 | 0.095006685 | 9.47E-06    | 0.868819888 |
| 0.031452019 | 0.378263996  | 6.77E-05    | 0.145037597 | 0.868819888 |
| 0.031452019 | 0.378263996  | 6.77E-05    | 0.145037597 | 0.868819888 |
| 0.031825134 | 0.618514525  | 1           | 0.02341474  | 0.868819888 |
| 0.031825134 | 0.618514525  | 1           | 0.02341474  | 0.868819888 |
| 0.031834368 | 0.683161903  | 0.989933981 | 0.102782106 | 0.868819888 |
| 0.031834368 | 0.683161903  | 0.989933981 | 0.102782106 | 0.868819888 |
| 0.03192897  | -0.634850895 | 1           | 0.025431136 | 0.868819888 |
| 0.032506356 | 0.493893107  | 0.584854032 | 0.000997588 | 0.868819888 |
| 0.032622944 | -0.556043101 | 1           | 0.003736177 | 0.868819888 |
| 0.032687661 | 0.701425605  | 0.439859057 | 0.397942841 | 0.868819888 |
| 0.032835749 | -0.262996409 | 0.030989574 | 8.55E-07    | 0.868819888 |
| 0.033447175 | -0.609427534 | 1           | 0.017403168 | 0.868819888 |
| 0.033447175 | -0.609427534 | 1           | 0.017403168 | 0.868819888 |
| 0.033539367 | -0.554994829 | 1           | 0.004171959 | 0.868819888 |
| 0.033539367 | -0.554994829 | 1           | 0.004171959 | 0.868819888 |
| 0.033553912 | -0.695880627 | 0.584854032 | 0.242167012 | 0.868819888 |
| 0.033553912 | -0.695880627 | 0.584854032 | 0.242167012 | 0.868819888 |
| 0.033600083 | -0.689004    | 0.737584497 | 0.145037597 | 0.868819888 |
| 0.033600083 | -0.689004    | 0.737584497 | 0.145037597 | 0.868819888 |
| 0.033866546 | -0.327656175 | 0.095006685 | 9.47E-06    | 0.868819888 |
| 0.034235252 | 0.119771076  | 6.38E-09    | 4.69E-05    | 0.868819888 |
| 0.034235252 | 0.119771076  | 6.38E-09    | 4.69E-05    | 0.868819888 |
| 0.034392602 | 0.350311356  | 0.134257478 | 1.80E-05    | 0.868819888 |
| 0.034392602 | 0.350311356  | 0.134257478 | 1.80E-05    | 0.868819888 |
| 0.034392602 | 0.350311356  | 0.134257478 | 1.80E-05    | 0.868819888 |
| 0.034429364 | -0.690347624 | 0.584854032 | 0.242167012 | 0.868819888 |
| 0.034429364 | -0.690347624 | 0.584854032 | 0.242167012 | 0.868819888 |
| 0.034429364 | -0.690347624 | 0.584854032 | 0.242167012 | 0.868819888 |
| 0.034429364 | -0.690347624 | 0.584854032 | 0.242167012 | 0.868819888 |
| 0.034429364 | -0.690347624 | 0.584854032 | 0.242167012 | 0.868819888 |
| 0.034751265 | -0.472952081 | 0.439859057 | 0.000596242 | 0.868819888 |
| 0.035139419 | 0.507829538  | 0.691111318 | 0.001791344 | 0.868819888 |
| 0.035207852 | -0.386082187 | 0.205025676 | 6.41E-05    | 0.868819888 |
| 0.035305135 | -0.332644422 | 0.095538718 | 1.04E-05    | 0.868819888 |
| 0.035305135 | -0.332644422 | 0.095538718 | 1.04E-05    | 0.868819888 |
| 0.035558686 | -0.683995217 | 0.584854032 | 0.164911511 | 0.868819888 |

|             |              |             |             |             |
|-------------|--------------|-------------|-------------|-------------|
| 0.035558686 | -0.683995217 | 0.584854032 | 0.164911511 | 0.868819888 |
| 0.035558686 | -0.683995217 | 0.584854032 | 0.164911511 | 0.868819888 |
| 0.035628767 | -0.258605546 | 0.030989574 | 8.55E-07    | 0.868819888 |
| 0.036885412 | -0.469530369 | 0.439859057 | 0.000997588 | 0.868819888 |
| 0.036885412 | -0.469530369 | 0.439859057 | 0.000997588 | 0.868819888 |
| 0.037255424 | 0.68435322   | 0.493333254 | 0.305102445 | 0.868819888 |
| 0.037255424 | 0.68435322   | 0.493333254 | 0.305102445 | 0.868819888 |
| 0.037557097 | 0.322209841  | 4.14E-05    | 0.060775899 | 0.868819888 |
| 0.037706077 | -0.655147697 | 1           | 0.085309726 | 0.868819888 |
| 0.038005628 | -0.392511544 | 0.295435331 | 0.000115129 | 0.868819888 |
| 0.038005628 | -0.392511544 | 0.295435331 | 0.000115129 | 0.868819888 |
| 0.038005628 | -0.392511544 | 0.295435331 | 0.000115129 | 0.868819888 |
| 0.038201912 | -0.643627384 | 1           | 0.060775899 | 0.868819888 |
| 0.038340182 | 0.658014636  | 1           | 0.102782106 | 0.868819888 |
| 0.038766783 | -0.27167813  | 0.034012327 | 3.06E-06    | 0.868819888 |
| 0.038880977 | -0.287643572 | 0.043105813 | 4.11E-06    | 0.868819888 |
| 0.038880977 | -0.287643572 | 0.043105813 | 4.11E-06    | 0.868819888 |
| 0.038918715 | -0.197478824 | 0.004526275 | 2.98E-07    | 0.868819888 |
| 0.038962697 | -0.679006436 | 0.412603306 | 0.489952655 | 0.868819888 |
| 0.03899777  | 0.177441322  | 9.36E-08    | 0.001090387 | 0.868819888 |
| 0.039475457 | -0.241076361 | 0.018394332 | 8.55E-07    | 0.868819888 |
| 0.039640129 | -0.236031612 | 0.018163994 | 8.55E-07    | 0.868819888 |
| 0.040251447 | 0.433001862  | 0.439859057 | 0.000324671 | 0.868819888 |
| 0.040264031 | 0.309850229  | 0.075374611 | 9.47E-06    | 0.868819888 |
| 0.040264031 | 0.309850229  | 0.075374611 | 9.47E-06    | 0.868819888 |
| 0.040341406 | -0.419005665 | 0.412603306 | 0.0002997   | 0.868819888 |
| 0.041065756 | 0.293210081  | 0.043105813 | 5.99E-06    | 0.868819888 |
| 0.041065756 | 0.293210081  | 0.043105813 | 5.99E-06    | 0.868819888 |
| 0.041065756 | 0.293210081  | 0.043105813 | 5.99E-06    | 0.868819888 |
| 0.041065756 | 0.293210081  | 0.043105813 | 5.99E-06    | 0.868819888 |
| 0.041065756 | 0.293210081  | 0.043105813 | 5.99E-06    | 0.868819888 |
| 0.041065756 | 0.293210081  | 0.043105813 | 5.99E-06    | 0.868819888 |
| 0.041065756 | 0.293210081  | 0.043105813 | 5.99E-06    | 0.868819888 |
| 0.041238056 | -0.332348014 | 0.095538718 | 1.80E-05    | 0.868819888 |
| 0.041238056 | -0.332348014 | 0.095538718 | 1.80E-05    | 0.868819888 |
| 0.041238056 | -0.332348014 | 0.095538718 | 1.80E-05    | 0.868819888 |
| 0.041238056 | -0.332348014 | 0.095538718 | 1.80E-05    | 0.868819888 |
| 0.041344769 | 0.29714526   | 0.043105813 | 9.47E-06    | 0.868819888 |
| 0.041961106 | -0.668616483 | 0.584854032 | 0.242167012 | 0.868819888 |
| 0.041961106 | -0.668616483 | 0.584854032 | 0.242167012 | 0.868819888 |
| 0.041961106 | -0.668616483 | 0.584854032 | 0.242167012 | 0.868819888 |
| 0.041974662 | -0.441231319 | 0.439859057 | 0.000596242 | 0.868819888 |
| 0.042208691 | -0.402762595 | 0.34036444  | 0.000163543 | 0.868819888 |
| 0.042506986 | 0.668631282  | 0.439859057 | 0.489952655 | 0.868819888 |
| 0.04268729  | -0.401539341 | 0.307400178 | 0.000163543 | 0.868819888 |
| 0.043143063 | 0.629771326  | 1           | 0.066020955 | 0.868819888 |
| 0.043446012 | 0.376686879  | 0.205025676 | 0.000115129 | 0.868819888 |
| 0.043466303 | -0.661515883 | 0.584854032 | 0.242167012 | 0.868819888 |
| 0.043466303 | -0.661515883 | 0.584854032 | 0.242167012 | 0.868819888 |
| 0.043466303 | -0.661515883 | 0.584854032 | 0.242167012 | 0.868819888 |
| 0.043466303 | -0.661515883 | 0.584854032 | 0.242167012 | 0.868819888 |
| 0.043466303 | -0.661515883 | 0.584854032 | 0.242167012 | 0.868819888 |
| 0.043466303 | -0.661515883 | 0.584854032 | 0.242167012 | 0.868819888 |
| 0.043466303 | -0.661515883 | 0.584854032 | 0.242167012 | 0.868819888 |
| 0.043950487 | -0.104094432 | 6.19E-05    | 3.90E-09    | 0.868819888 |
| 0.043976613 | -0.637868453 | 1           | 0.10273905  | 0.868819888 |
| 0.043976613 | -0.637868453 | 1           | 0.10273905  | 0.868819888 |
| 0.04459961  | 0.651450825  | 0.205025676 | 0.850173656 | 0.868819888 |
| 0.044657359 | 0.202652696  | 4.10E-07    | 0.003736177 | 0.868819888 |
| 0.044761404 | 0.246895303  | 4.58E-06    | 0.011906673 | 0.868819888 |
| 0.044881068 | 0.6333657    | 1           | 0.085309726 | 0.868819888 |
| 0.044881068 | 0.6333657    | 1           | 0.085309726 | 0.868819888 |
| 0.044927344 | 0.324350084  | 0.095538718 | 1.93E-05    | 0.868819888 |
| 0.044957942 | 0.495302907  | 0.737584497 | 0.002420613 | 0.868819888 |
| 0.045094187 | 0.515320951  | 0.008580492 | 0.850173656 | 0.868819888 |
| 0.045671272 | -0.270610845 | 0.035148121 | 4.11E-06    | 0.868819888 |

|             |              |             |             |             |
|-------------|--------------|-------------|-------------|-------------|
| 0.045671272 | -0.270610845 | 0.035148121 | 4.11E-06    | 0.868819888 |
| 0.045671272 | -0.270610845 | 0.035148121 | 4.11E-06    | 0.868819888 |
| 0.045772919 | -0.232096965 | 0.018163994 | 8.55E-07    | 0.868819888 |
| 0.045901209 | 0.644735529  | 0.88322726  | 0.145037597 | 0.868819888 |
| 0.045901209 | 0.644735529  | 0.88322726  | 0.145037597 | 0.868819888 |
| 0.045901209 | 0.644735529  | 0.88322726  | 0.145037597 | 0.868819888 |
| 0.046304539 | -0.652541189 | 0.691111318 | 0.242167012 | 0.868819888 |
| 0.046345686 | -0.65649619  | 0.584854032 | 0.364167203 | 0.868819888 |
| 0.046345686 | -0.65649619  | 0.584854032 | 0.364167203 | 0.868819888 |
| 0.046462452 | 0.110923125  | 6.38E-09    | 4.69E-05    | 0.868819888 |
| 0.047056504 | 0.650100959  | 0.737584497 | 0.242167012 | 0.868819888 |
| 0.047056504 | 0.650100959  | 0.737584497 | 0.242167012 | 0.868819888 |
| 0.047166339 | 0.637643765  | 0.19926681  | 1           | 0.868819888 |
| 0.047166339 | 0.637643765  | 0.19926681  | 1           | 0.868819888 |
| 0.047379208 | -0.651003994 | 0.584854032 | 0.242167012 | 0.868819888 |
| 0.047379208 | -0.651003994 | 0.584854032 | 0.242167012 | 0.868819888 |
| 0.047452137 | -0.64522408  | 0.737584497 | 0.164911511 | 0.868819888 |
| 0.047452137 | -0.64522408  | 0.737584497 | 0.164911511 | 0.868819888 |
| 0.047452137 | -0.64522408  | 0.737584497 | 0.164911511 | 0.868819888 |
| 0.047457691 | -0.390616454 | 0.307400178 | 0.000163543 | 0.868819888 |
| 0.047457691 | -0.390616454 | 0.307400178 | 0.000163543 | 0.868819888 |
| 0.047869093 | -0.422517875 | 0.412603306 | 0.000596242 | 0.868819888 |
| 0.047972549 | -0.17058436  | 0.001207877 | 9.79E-08    | 0.868819888 |
| 0.047972549 | -0.17058436  | 0.001207877 | 9.79E-08    | 0.868819888 |
| 0.048246925 | -0.652701162 | 0.439859057 | 0.416730107 | 0.868819888 |
| 0.048530004 | -0.263805932 | 0.034012327 | 4.11E-06    | 0.868819888 |
| 0.048530004 | -0.263805932 | 0.034012327 | 4.11E-06    | 0.868819888 |
| 0.048530004 | -0.263805932 | 0.034012327 | 4.11E-06    | 0.868819888 |
| 0.048530004 | -0.263805932 | 0.034012327 | 4.11E-06    | 0.868819888 |
| 0.048763522 | -0.160912145 | 0.0008771   | 9.27E-08    | 0.868819888 |
| 0.04881438  | 0.149655671  | 4.36E-08    | 0.000324671 | 0.868819888 |
| 0.048914045 | 0.203656268  | 1.09E-06    | 0.003736177 | 0.868819888 |
| 0.04915092  | 0.650263664  | 0.439859057 | 0.489952655 | 0.868819888 |
| 0.04915092  | 0.650263664  | 0.439859057 | 0.489952655 | 0.868819888 |
| 0.049203234 | -0.646925254 | 0.584854032 | 0.242167012 | 0.868819888 |
| 0.049499334 | -0.288326583 | 0.043105813 | 9.47E-06    | 0.868819888 |
| 0.049499334 | -0.288326583 | 0.043105813 | 9.47E-06    | 0.868819888 |
| 0.049512676 | -0.339535173 | 0.169239932 | 4.69E-05    | 0.868819888 |
| 0.049589561 | 0.646688831  | 0.412603306 | 0.601859652 | 0.868819888 |
| 0.049658303 | 0.608995188  | 0.095006685 | 1           | 0.868819888 |
| 0.050250147 | -0.515957636 | 0.989933981 | 0.006372161 | 0.868819888 |
| 0.050385612 | 0.148366319  | 4.36E-08    | 0.000324671 | 0.868819888 |
| 0.050385612 | 0.148366319  | 4.36E-08    | 0.000324671 | 0.868819888 |
| 0.05089417  | 0.602680367  | 1           | 0.060775899 | 0.868819888 |
| 0.05089417  | 0.602680367  | 1           | 0.060775899 | 0.868819888 |
| 0.050966006 | 0.645333221  | 0.439859057 | 0.416730107 | 0.868819888 |
| 0.05096929  | -0.284550733 | 0.043105813 | 9.47E-06    | 0.868819888 |
| 0.05096929  | -0.284550733 | 0.043105813 | 9.47E-06    | 0.868819888 |
| 0.051075    | -0.324289834 | 0.095538718 | 4.69E-05    | 0.868819888 |
| 0.051075    | -0.324289834 | 0.095538718 | 4.69E-05    | 0.868819888 |
| 0.051255161 | 0.327375184  | 6.77E-05    | 0.085309726 | 0.868819888 |
| 0.05128188  | -0.235720754 | 0.018394332 | 3.06E-06    | 0.868819888 |
| 0.05153766  | 0.596444139  | 0.075374611 | 1           | 0.868819888 |
| 0.051637895 | -0.605890828 | 1           | 0.06824239  | 0.868819888 |
| 0.051640883 | -0.265625486 | 0.035148121 | 4.11E-06    | 0.868819888 |
| 0.051910169 | 0.633837562  | 0.737584497 | 0.242167012 | 0.868819888 |
| 0.052395061 | 0.339982423  | 0.169239932 | 6.41E-05    | 0.868819888 |
| 0.052395061 | 0.339982423  | 0.169239932 | 6.41E-05    | 0.868819888 |
| 0.053132926 | -0.569445098 | 0.043105813 | 1           | 0.868819888 |
| 0.053132926 | -0.569445098 | 0.043105813 | 1           | 0.868819888 |
| 0.053229818 | 0.597927564  | 1           | 0.061934943 | 0.868819888 |
| 0.053267566 | 0.552204995  | 1           | 0.02341474  | 0.868819888 |
| 0.053317073 | -0.624398371 | 0.989933981 | 0.145037597 | 0.868819888 |
| 0.053480627 | 0.636542542  | 0.412603306 | 0.645935818 | 0.868819888 |

|             |              |             |             |             |
|-------------|--------------|-------------|-------------|-------------|
| 0.053736921 | -0.482476518 | 0.737584497 | 0.003736177 | 0.868819888 |
| 0.053869407 | 0.44590714   | 0.002297238 | 0.489952655 | 0.868819888 |
| 0.054119612 | 0.632722489  | 0.412603306 | 0.704162183 | 0.868819888 |
| 0.054188959 | 0.465312308  | 0.004273917 | 0.601859652 | 0.868819888 |
| 0.054249272 | 0.449220509  | 0.584854032 | 0.001791344 | 0.868819888 |
| 0.054323672 | 0.377941221  | 0.307400178 | 0.00028972  | 0.868819888 |
| 0.054323672 | 0.377941221  | 0.307400178 | 0.00028972  | 0.868819888 |
| 0.054325493 | -0.630139271 | 0.307400178 | 0.704162183 | 0.868819888 |
| 0.054429794 | 0.18521625   | 4.10E-07    | 0.002093839 | 0.868819888 |
| 0.054540437 | -0.629806048 | 0.737584497 | 0.242167012 | 0.868819888 |
| 0.054650065 | 0.487866956  | 0.737584497 | 0.004171959 | 0.868819888 |
| 0.054650065 | 0.487866956  | 0.737584497 | 0.004171959 | 0.868819888 |
| 0.054650065 | 0.487866956  | 0.737584497 | 0.004171959 | 0.868819888 |
| 0.054650065 | 0.487866956  | 0.737584497 | 0.004171959 | 0.868819888 |
| 0.054913604 | 0.592641155  | 1           | 0.061934943 | 0.868819888 |
| 0.055276188 | -0.428371735 | 0.439859057 | 0.001090387 | 0.868819888 |
| 0.055276188 | -0.428371735 | 0.439859057 | 0.001090387 | 0.868819888 |
| 0.055439557 | 0.516731662  | 1           | 0.009270366 | 0.868819888 |
| 0.055587919 | -0.399043868 | 0.412603306 | 0.000348916 | 0.868819888 |
| 0.055587919 | -0.399043868 | 0.412603306 | 0.000348916 | 0.868819888 |
| 0.055685098 | 0.624177527  | 0.307400178 | 0.850173656 | 0.868819888 |
| 0.055738027 | -0.108393462 | 6.77E-05    | 6.53E-09    | 0.868819888 |
| 0.055738027 | -0.108393462 | 6.77E-05    | 6.53E-09    | 0.868819888 |
| 0.055738027 | -0.108393462 | 6.77E-05    | 6.53E-09    | 0.868819888 |
| 0.055822453 | -0.619614223 | 0.989933981 | 0.145037597 | 0.868819888 |
| 0.055971107 | -0.601226829 | 1           | 0.085309726 | 0.868819888 |
| 0.056111134 | 0.488263683  | 0.737584497 | 0.005827837 | 0.868819888 |
| 0.056365111 | 0.618125509  | 0.989933981 | 0.145037597 | 0.868819888 |
| 0.056673054 | 0.233891053  | 4.58E-06    | 0.011906673 | 0.868819888 |
| 0.056684522 | -0.303648242 | 0.087427713 | 4.35E-05    | 0.868819888 |
| 0.056794339 | -0.620149119 | 0.881481882 | 0.164911511 | 0.868819888 |
| 0.057106081 | -0.609018053 | 1           | 0.145037597 | 0.868819888 |
| 0.057220212 | -0.594179883 | 1           | 0.085309726 | 0.868819888 |
| 0.057272227 | -0.589676353 | 1           | 0.066020955 | 0.868819888 |
| 0.057351843 | -0.371988431 | 0.295435331 | 0.00028972  | 0.868819888 |
| 0.057351843 | -0.371988431 | 0.295435331 | 0.00028972  | 0.868819888 |
| 0.057861821 | 0.587216636  | 1           | 0.066020955 | 0.868819888 |
| 0.057897116 | 0.628460535  | 0.439859057 | 0.489952655 | 0.868819888 |
| 0.057963977 | 0.120417448  | 2.61E-08    | 0.000115129 | 0.868819888 |
| 0.058112627 | -0.597625974 | 1           | 0.10273905  | 0.868819888 |
| 0.058187631 | -0.569801882 | 0.066393258 | 1           | 0.868819888 |
| 0.058490233 | 0.283070147  | 0.043105813 | 1.29E-05    | 0.868819888 |
| 0.058711434 | 0.391336794  | 0.0008771   | 0.242167012 | 0.868819888 |
| 0.058908579 | -0.611266028 | 0.205025676 | 1           | 0.868819888 |
| 0.058934164 | 0.613563877  | 0.989933981 | 0.164911511 | 0.868819888 |
| 0.058978645 | -0.277497775 | 0.043105813 | 1.04E-05    | 0.868819888 |
| 0.059203379 | -0.159840643 | 0.0008771   | 9.79E-08    | 0.868819888 |
| 0.059203379 | -0.159840643 | 0.0008771   | 9.79E-08    | 0.868819888 |
| 0.059203379 | -0.159840643 | 0.0008771   | 9.79E-08    | 0.868819888 |
| 0.059203379 | -0.159840643 | 0.0008771   | 9.79E-08    | 0.868819888 |
| 0.059203379 | -0.159840643 | 0.0008771   | 9.79E-08    | 0.868819888 |
| 0.059203379 | -0.159840643 | 0.0008771   | 9.79E-08    | 0.868819888 |
| 0.059203379 | -0.159840643 | 0.0008771   | 9.79E-08    | 0.868819888 |
| 0.059425011 | -0.192487118 | 0.004526275 | 5.53E-07    | 0.868819888 |
| 0.059425011 | -0.192487118 | 0.004526275 | 5.53E-07    | 0.868819888 |
| 0.059927036 | 0.458234546  | 0.584854032 | 0.002420613 | 0.868819888 |
| 0.060008595 | 0.621739207  | 0.584854032 | 0.364167203 | 0.868819888 |
| 0.060549324 | 0.394588259  | 0.0008771   | 0.242167012 | 0.868819888 |
| 0.060601032 | 0.57520636   | 1           | 0.060775899 | 0.868819888 |
| 0.061267787 | -0.604910397 | 1           | 0.145037597 | 0.868819888 |
| 0.061267787 | -0.604910397 | 1           | 0.145037597 | 0.868819888 |
| 0.061267787 | -0.604910397 | 1           | 0.145037597 | 0.868819888 |
| 0.061267787 | -0.604910397 | 1           | 0.145037597 | 0.868819888 |
| 0.061624101 | 0.391703781  | 0.0008771   | 0.242167012 | 0.868819888 |
| 0.061720378 | -0.619744858 | 0.439859057 | 0.489952655 | 0.868819888 |



|             |              |             |             |             |
|-------------|--------------|-------------|-------------|-------------|
| 0.061720378 | -0.619744858 | 0.439859057 | 0.489952655 | 0.868819888 |
| 0.061726191 | 0.465910417  | 0.584854032 | 0.003736177 | 0.868819888 |
| 0.06173499  | 0.61089373   | 0.307400178 | 0.850173656 | 0.868819888 |
| 0.06173499  | 0.61089373   | 0.307400178 | 0.850173656 | 0.868819888 |
| 0.06173499  | 0.61089373   | 0.307400178 | 0.850173656 | 0.868819888 |
| 0.061743225 | -0.304758006 | 0.095006685 | 4.69E-05    | 0.868819888 |
| 0.062058289 | 0.412592088  | 0.001207877 | 0.397942841 | 0.868819888 |
| 0.062095467 | 0.462909319  | 0.584854032 | 0.003736177 | 0.868819888 |
| 0.062095467 | 0.462909319  | 0.584854032 | 0.003736177 | 0.868819888 |
| 0.062184142 | -0.249433743 | 0.034012327 | 4.11E-06    | 0.868819888 |
| 0.062239067 | -0.478163019 | 0.737584497 | 0.005827837 | 0.868819888 |
| 0.06284475  | -0.597605995 | 1           | 0.145037597 | 0.868819888 |
| 0.06284475  | -0.597605995 | 1           | 0.145037597 | 0.868819888 |
| 0.06284475  | -0.597605995 | 1           | 0.145037597 | 0.868819888 |
| 0.06284475  | -0.597605995 | 1           | 0.145037597 | 0.868819888 |
| 0.062915849 | 0.593456484  | 0.192696374 | 1           | 0.868819888 |
| 0.063213243 | 0.238943103  | 7.65E-06    | 0.011906673 | 0.868819888 |
| 0.063213243 | 0.238943103  | 7.65E-06    | 0.011906673 | 0.868819888 |
| 0.063213243 | 0.238943103  | 7.65E-06    | 0.011906673 | 0.868819888 |
| 0.063213243 | 0.238943103  | 7.65E-06    | 0.011906673 | 0.868819888 |
| 0.063213243 | 0.238943103  | 7.65E-06    | 0.011906673 | 0.868819888 |
| 0.063213243 | 0.238943103  | 7.65E-06    | 0.011906673 | 0.868819888 |
| 0.063213243 | 0.238943103  | 7.65E-06    | 0.011906673 | 0.868819888 |
| 0.063310165 | 0.551103621  | 1           | 0.041232736 | 0.868819888 |
| 0.063453712 | 0.162432884  | 1.48E-07    | 0.001090387 | 0.868819888 |
| 0.063521962 | -0.610117978 | 0.737584497 | 0.242167012 | 0.868819888 |
| 0.063521962 | -0.610117978 | 0.737584497 | 0.242167012 | 0.868819888 |
| 0.063663475 | -0.606005071 | 0.881481882 | 0.242167012 | 0.868819888 |
| 0.063772826 | 0.405434392  | 0.412603306 | 0.000997588 | 0.868819888 |
| 0.064301731 | 0.262768445  | 1.56E-05    | 0.025431136 | 0.868819888 |
| 0.065205346 | 0.60356382   | 0.307400178 | 0.850173656 | 0.868819888 |
| 0.065288392 | -0.373679914 | 0.307400178 | 0.000324671 | 0.868819888 |
| 0.065288392 | -0.373679914 | 0.307400178 | 0.000324671 | 0.868819888 |
| 0.065288392 | -0.373679914 | 0.307400178 | 0.000324671 | 0.868819888 |
| 0.065349745 | 0.387866765  | 0.412603306 | 0.000596242 | 0.868819888 |
| 0.065356833 | 0.297680262  | 0.075374611 | 4.69E-05    | 0.868819888 |
| 0.06557857  | 0.152793998  | 9.36E-08    | 0.000596242 | 0.868819888 |
| 0.065648402 | 0.074568079  | 1.44E-09    | 3.06E-06    | 0.868819888 |
| 0.065872461 | 0.610308505  | 0.439859057 | 0.489952655 | 0.868819888 |
| 0.065894107 | 0.572613629  | 1           | 0.085309726 | 0.868819888 |
| 0.066353709 | 0.13202655   | 4.36E-08    | 0.000163543 | 0.868819888 |
| 0.066660401 | -0.241010743 | 0.030989574 | 4.11E-06    | 0.868819888 |
| 0.066680438 | -0.569171936 | 0.095538718 | 1           | 0.868819888 |
| 0.066680438 | -0.569171936 | 0.095538718 | 1           | 0.868819888 |
| 0.066706471 | 0.488690915  | 0.881481882 | 0.009270366 | 0.868819888 |
| 0.066706471 | 0.488690915  | 0.881481882 | 0.009270366 | 0.868819888 |
| 0.066706471 | 0.488690915  | 0.881481882 | 0.009270366 | 0.868819888 |
| 0.066720474 | -0.328140404 | 0.169239932 | 0.000115129 | 0.868819888 |
| 0.066720474 | -0.328140404 | 0.169239932 | 0.000115129 | 0.868819888 |
| 0.066785354 | -0.168919049 | 0.001207877 | 2.98E-07    | 0.868819888 |
| 0.067336864 | 0.588596637  | 1           | 0.145037597 | 0.868819888 |
| 0.067336864 | 0.588596637  | 1           | 0.145037597 | 0.868819888 |
| 0.067572032 | 0.215936146  | 4.58E-06    | 0.006372161 | 0.868819888 |
| 0.067862879 | 0.337945912  | 0.000261772 | 0.145037597 | 0.868819888 |
| 0.067958901 | 0.304564648  | 8.53E-05    | 0.066020955 | 0.868819888 |
| 0.068337154 | 0.578881093  | 1           | 0.126792252 | 0.868819888 |
| 0.068337154 | 0.578881093  | 1           | 0.126792252 | 0.868819888 |
| 0.06863908  | -0.475671988 | 0.737584497 | 0.006372161 | 0.868819888 |
| 0.06863908  | -0.475671988 | 0.737584497 | 0.006372161 | 0.868819888 |
| 0.068680905 | 0.084025399  | 1.89E-09    | 5.99E-06    | 0.868819888 |
| 0.068767619 | -0.237183428 | 0.030989574 | 4.11E-06    | 0.868819888 |
| 0.068767619 | -0.237183428 | 0.030989574 | 4.11E-06    | 0.868819888 |
| 0.068910302 | -0.56945379  | 1           | 0.085309726 | 0.868819888 |
| 0.069005473 | 0.359352686  | 0.295435331 | 0.0002997   | 0.868819888 |
| 0.069822126 | -0.297090675 | 0.087427713 | 4.69E-05    | 0.868819888 |

|             |              |             |             |             |
|-------------|--------------|-------------|-------------|-------------|
| 0.069984357 | 0.60205269   | 0.439859057 | 0.489952655 | 0.868819888 |
| 0.07043966  | 0.433013303  | 0.004526275 | 0.489952655 | 0.868819888 |
| 0.070474578 | 0.596560079  | 0.412603306 | 0.704162183 | 0.868819888 |
| 0.07057942  | -0.503421662 | 0.030989574 | 1           | 0.868819888 |
| 0.071052264 | 0.440114349  | 0.584854032 | 0.003736177 | 0.868819888 |
| 0.071313415 | 0.324960788  | 0.000245628 | 0.126792252 | 0.868819888 |
| 0.0713598   | -0.599036315 | 0.439859057 | 0.601859652 | 0.868819888 |
| 0.0713598   | -0.599036315 | 0.439859057 | 0.601859652 | 0.868819888 |
| 0.071762168 | 0.541175236  | 0.073031096 | 1           | 0.868819888 |
| 0.071886553 | 0.598138039  | 0.439859057 | 0.489952655 | 0.868819888 |
| 0.071886553 | 0.598138039  | 0.439859057 | 0.489952655 | 0.868819888 |
| 0.072061608 | 0.389944562  | 0.412603306 | 0.000997588 | 0.868819888 |
| 0.072061608 | 0.389944562  | 0.412603306 | 0.000997588 | 0.868819888 |
| 0.072133118 | 0.485959608  | 0.989933981 | 0.011906673 | 0.868819888 |
| 0.072841624 | -0.490405525 | 1           | 0.011906673 | 0.868819888 |
| 0.07291559  | 0.542403141  | 1           | 0.060775899 | 0.868819888 |
| 0.072974566 | -0.596248557 | 0.584854032 | 0.489952655 | 0.868819888 |
| 0.073262314 | -0.581494306 | 1           | 0.164911511 | 0.868819888 |
| 0.073262314 | -0.581494306 | 1           | 0.164911511 | 0.868819888 |
| 0.073447721 | 0.431006938  | 0.004526275 | 0.489952655 | 0.868819888 |
| 0.073657787 | -0.594137123 | 0.439859057 | 0.645935818 | 0.868819888 |
| 0.073740139 | -0.335924918 | 0.19926681  | 0.000163543 | 0.868819888 |
| 0.073967507 | -0.374981686 | 0.412603306 | 0.000596242 | 0.868819888 |
| 0.073967507 | -0.374981686 | 0.412603306 | 0.000596242 | 0.868819888 |
| 0.074099449 | -0.169768725 | 0.002297238 | 2.98E-07    | 0.868819888 |
| 0.074099449 | -0.169768725 | 0.002297238 | 2.98E-07    | 0.868819888 |
| 0.074099449 | -0.169768725 | 0.002297238 | 2.98E-07    | 0.868819888 |
| 0.074157442 | -0.332435906 | 0.192696374 | 0.000140627 | 0.868819888 |
| 0.074157442 | -0.332435906 | 0.192696374 | 0.000140627 | 0.868819888 |
| 0.074209952 | 0.396400065  | 0.412603306 | 0.001090387 | 0.868819888 |
| 0.074280418 | -0.584165113 | 0.989933981 | 0.242167012 | 0.868819888 |
| 0.074280418 | -0.584165113 | 0.989933981 | 0.242167012 | 0.868819888 |
| 0.074416941 | 0.582273524  | 1           | 0.242167012 | 0.868819888 |
| 0.074416941 | 0.582273524  | 1           | 0.242167012 | 0.868819888 |
| 0.074539902 | 0.484071699  | 0.989933981 | 0.011906673 | 0.868819888 |
| 0.074556541 | 0.591491462  | 0.439859057 | 0.704162183 | 0.868819888 |
| 0.07463541  | 0.582186859  | 0.307400178 | 1           | 0.868819888 |
| 0.07463541  | 0.582186859  | 0.307400178 | 1           | 0.868819888 |
| 0.074672918 | -0.53647707  | 0.075374611 | 1           | 0.868819888 |
| 0.074798662 | 0.249038135  | 1.56E-05    | 0.025431136 | 0.868819888 |
| 0.074813412 | 0.411231931  | 0.003169634 | 0.416730107 | 0.868819888 |
| 0.074869493 | -0.592087233 | 0.439859057 | 0.601859652 | 0.868819888 |
| 0.074869493 | -0.592087233 | 0.439859057 | 0.601859652 | 0.868819888 |
| 0.074957864 | -0.586286346 | 0.881481882 | 0.242167012 | 0.868819888 |
| 0.074980115 | -0.33442211  | 0.19926681  | 0.000163543 | 0.868819888 |
| 0.075289882 | 0.442399514  | 0.008580492 | 0.645935818 | 0.868819888 |
| 0.075289882 | 0.442399514  | 0.008580492 | 0.645935818 | 0.868819888 |
| 0.075526082 | 0.548918517  | 0.095538718 | 1           | 0.868819888 |
| 0.075734632 | 0.421833406  | 0.439859057 | 0.002420613 | 0.868819888 |
| 0.075734632 | 0.421833406  | 0.439859057 | 0.002420613 | 0.868819888 |
| 0.075734632 | 0.421833406  | 0.439859057 | 0.002420613 | 0.868819888 |
| 0.075806344 | -0.116005948 | 0.000155445 | 1.63E-08    | 0.868819888 |
| 0.075907206 | 0.570309387  | 1           | 0.145037597 | 0.868819888 |
| 0.076147794 | -0.218826486 | 0.018163994 | 3.16E-06    | 0.868819888 |
| 0.076147794 | -0.218826486 | 0.018163994 | 3.16E-06    | 0.868819888 |
| 0.076199425 | 0.078701657  | 1.89E-09    | 4.11E-06    | 0.868819888 |
| 0.07644672  | -0.129916842 | 0.000295301 | 5.53E-08    | 0.868819888 |
| 0.076481816 | -0.416347367 | 0.439859057 | 0.002420613 | 0.868819888 |
| 0.076481816 | -0.416347367 | 0.439859057 | 0.002420613 | 0.868819888 |
| 0.076481816 | -0.416347367 | 0.439859057 | 0.002420613 | 0.868819888 |
| 0.076538646 | 0.349014935  | 0.205025676 | 0.000324671 | 0.868819888 |
| 0.076627384 | 0.525526249  | 0.043105813 | 1           | 0.868819888 |
| 0.076855523 | 0.094093996  | 7.89E-09    | 1.65E-05    | 0.868819888 |
| 0.076855523 | 0.094093996  | 7.89E-09    | 1.65E-05    | 0.868819888 |

|             |              |             |             |             |
|-------------|--------------|-------------|-------------|-------------|
| 0.076863507 | -0.505980457 | 1           | 0.025431136 | 0.868819888 |
| 0.076863507 | -0.505980457 | 1           | 0.025431136 | 0.868819888 |
| 0.077211061 | -0.558319959 | 0.169239932 | 1           | 0.868819888 |
| 0.077570452 | -0.434265791 | 0.584854032 | 0.003736177 | 0.868819888 |
| 0.077631774 | -0.586350833 | 0.584854032 | 0.416730107 | 0.868819888 |
| 0.077631774 | -0.586350833 | 0.584854032 | 0.416730107 | 0.868819888 |
| 0.077750264 | -0.321709397 | 0.169239932 | 0.000124759 | 0.868819888 |
| 0.077761044 | 0.587085587  | 0.439859057 | 0.489952655 | 0.868819888 |
| 0.077761044 | 0.587085587  | 0.439859057 | 0.489952655 | 0.868819888 |
| 0.077773438 | 0.470508201  | 0.881481882 | 0.009270366 | 0.868819888 |
| 0.077913992 | -0.581666282 | 0.412603306 | 0.850173656 | 0.868819888 |
| 0.078358914 | -0.584663347 | 0.584854032 | 0.416730107 | 0.868819888 |
| 0.078358914 | -0.584663347 | 0.584854032 | 0.416730107 | 0.868819888 |
| 0.079258086 | -0.583869043 | 0.584854032 | 0.489952655 | 0.868819888 |
| 0.079519839 | 0.465068847  | 0.018163994 | 0.850173656 | 0.868819888 |
| 0.079598211 | -0.309464475 | 0.104319013 | 0.000115129 | 0.868819888 |
| 0.079598211 | -0.309464475 | 0.104319013 | 0.000115129 | 0.868819888 |
| 0.079604768 | 0.414220145  | 0.439859057 | 0.002420613 | 0.868819888 |
| 0.079728398 | -0.323845526 | 0.169239932 | 0.000140627 | 0.868819888 |
| 0.079728398 | -0.323845526 | 0.169239932 | 0.000140627 | 0.868819888 |
| 0.080167883 | -0.441309955 | 0.584854032 | 0.006372161 | 0.868819888 |
| 0.080413327 | -0.160198926 | 0.001207877 | 2.98E-07    | 0.868819888 |
| 0.080666516 | -0.579541379 | 0.737584497 | 0.397942841 | 0.868819888 |
| 0.080666516 | -0.579541379 | 0.737584497 | 0.397942841 | 0.868819888 |
| 0.080672689 | -0.56834098  | 1           | 0.242167012 | 0.868819888 |
| 0.08090072  | 0.242311417  | 1.56E-05    | 0.02341474  | 0.868819888 |
| 0.081764151 | 0.488774855  | 1           | 0.02341474  | 0.868819888 |
| 0.081764151 | 0.488774855  | 1           | 0.02341474  | 0.868819888 |
| 0.081764151 | 0.488774855  | 1           | 0.02341474  | 0.868819888 |
| 0.081901038 | 0.106170519  | 2.61E-08    | 4.69E-05    | 0.868819888 |
| 0.081938072 | -0.546848196 | 1           | 0.126792252 | 0.868819888 |
| 0.081938072 | -0.546848196 | 1           | 0.126792252 | 0.868819888 |
| 0.0819404   | -0.238010962 | 0.034012327 | 9.47E-06    | 0.868819888 |
| 0.0819404   | -0.238010962 | 0.034012327 | 9.47E-06    | 0.868819888 |
| 0.082155755 | -0.526034521 | 1           | 0.060775899 | 0.868819888 |
| 0.082155755 | -0.526034521 | 1           | 0.060775899 | 0.868819888 |
| 0.082187989 | 0.555711171  | 0.19926681  | 1           | 0.868819888 |
| 0.082404777 | -0.173490862 | 0.003169634 | 5.53E-07    | 0.868819888 |
| 0.082404777 | -0.173490862 | 0.003169634 | 5.53E-07    | 0.868819888 |
| 0.082462457 | -0.506148722 | 1           | 0.031639242 | 0.868819888 |
| 0.082462457 | -0.506148722 | 1           | 0.031639242 | 0.868819888 |
| 0.082482944 | -0.565656359 | 1           | 0.242167012 | 0.868819888 |
| 0.082867497 | -0.569449192 | 0.412603306 | 1           | 0.868819888 |
| 0.083096325 | 0.52139636   | 1           | 0.060775899 | 0.868819888 |
| 0.083609873 | -0.553545277 | 0.19926681  | 1           | 0.868819888 |
| 0.083753427 | -0.445331969 | 0.737584497 | 0.006372161 | 0.868819888 |
| 0.083762364 | -0.573717537 | 0.737584497 | 0.397942841 | 0.868819888 |
| 0.083762364 | -0.573717537 | 0.737584497 | 0.397942841 | 0.868819888 |
| 0.084018859 | 0.317880048  | 0.169239932 | 0.000140627 | 0.868819888 |
| 0.084181788 | 0.55232822   | 1           | 0.145037597 | 0.868819888 |
| 0.084181788 | 0.55232822   | 1           | 0.145037597 | 0.868819888 |
| 0.084181788 | 0.55232822   | 1           | 0.145037597 | 0.868819888 |
| 0.08428092  | 0.383583192  | 0.001611045 | 0.364167203 | 0.868819888 |
| 0.085033652 | -0.56752115  | 0.88322726  | 0.242167012 | 0.868819888 |
| 0.085196137 | -0.486781192 | 0.034012327 | 1           | 0.868819888 |
| 0.085196137 | -0.486781192 | 0.034012327 | 1           | 0.868819888 |
| 0.085568198 | 0.382499253  | 0.412603306 | 0.001791344 | 0.868819888 |
| 0.085568198 | 0.382499253  | 0.412603306 | 0.001791344 | 0.868819888 |
| 0.085568198 | 0.382499253  | 0.412603306 | 0.001791344 | 0.868819888 |
| 0.085655447 | 0.557049419  | 1           | 0.164911511 | 0.868819888 |
| 0.086021842 | 0.246175745  | 6.19E-05    | 0.025431136 | 0.868819888 |
| 0.086362666 | 0.530444119  | 1           | 0.085309726 | 0.868819888 |
| 0.086535691 | 0.282211108  | 0.075374611 | 6.41E-05    | 0.868819888 |
| 0.086917695 | 0.386924223  | 0.003169634 | 0.397942841 | 0.868819888 |

|             |              |             |             |             |
|-------------|--------------|-------------|-------------|-------------|
| 0.086999287 | -0.566231209 | 0.412603306 | 0.850173656 | 0.868819888 |
| 0.086999287 | -0.566231209 | 0.412603306 | 0.850173656 | 0.868819888 |
| 0.087087352 | -0.494008976 | 1           | 0.031639242 | 0.868819888 |
| 0.087087352 | -0.494008976 | 1           | 0.031639242 | 0.868819888 |
| 0.087101892 | 0.402746236  | 0.439859057 | 0.002420613 | 0.868819888 |
| 0.087154737 | 0.3786977    | 0.412603306 | 0.001791344 | 0.868819888 |
| 0.087194149 | 0.561510302  | 1           | 0.242167012 | 0.868819888 |
| 0.087194149 | 0.561510302  | 1           | 0.242167012 | 0.868819888 |
| 0.087240551 | 0.551781478  | 1           | 0.145037597 | 0.868819888 |
| 0.087495995 | -0.55396336  | 1           | 0.164911511 | 0.868819888 |
| 0.087594089 | 0.385462296  | 0.003169634 | 0.397942841 | 0.868819888 |
| 0.087643623 | 0.533083961  | 0.134257478 | 1           | 0.868819888 |
| 0.087899103 | -0.544407074 | 0.19926681  | 1           | 0.868819888 |
| 0.088200506 | -0.128414945 | 0.000467492 | 9.27E-08    | 0.868819888 |
| 0.088241625 | 0.49803776   | 1           | 0.034534533 | 0.868819888 |
| 0.088241625 | 0.49803776   | 1           | 0.034534533 | 0.868819888 |
| 0.088374724 | -0.142622345 | 0.0008771   | 1.54E-07    | 0.868819888 |
| 0.088577667 | 0.362853879  | 0.001207877 | 0.242167012 | 0.868819888 |
| 0.088577667 | 0.362853879  | 0.001207877 | 0.242167012 | 0.868819888 |
| 0.088577667 | 0.362853879  | 0.001207877 | 0.242167012 | 0.868819888 |
| 0.088588566 | -0.562499338 | 0.412603306 | 1           | 0.868819888 |
| 0.088661837 | 0.566330843  | 0.439859057 | 0.704162183 | 0.868819888 |
| 0.088661837 | 0.566330843  | 0.439859057 | 0.704162183 | 0.868819888 |
| 0.088661837 | 0.566330843  | 0.439859057 | 0.704162183 | 0.868819888 |
| 0.088677111 | 0.360781932  | 0.34036444  | 0.000997588 | 0.868819888 |
| 0.088677111 | 0.360781932  | 0.34036444  | 0.000997588 | 0.868819888 |
| 0.088884914 | 0.539310924  | 0.192696374 | 1           | 0.868819888 |
| 0.088884914 | 0.539310924  | 0.192696374 | 1           | 0.868819888 |
| 0.088915007 | 0.560245092  | 0.989933981 | 0.242167012 | 0.868819888 |
| 0.089264242 | 0.172907372  | 1.23E-06    | 0.002093839 | 0.868819888 |
| 0.089366877 | 0.416163369  | 0.584854032 | 0.004171959 | 0.868819888 |
| 0.089397225 | -0.56231508  | 0.881481882 | 0.364167203 | 0.868819888 |
| 0.089397225 | -0.56231508  | 0.881481882 | 0.364167203 | 0.868819888 |
| 0.089445835 | 0.364020003  | 0.001207877 | 0.242167012 | 0.868819888 |
| 0.089522049 | 0.271372526  | 8.53E-05    | 0.052574033 | 0.868819888 |
| 0.089522049 | 0.271372526  | 8.53E-05    | 0.052574033 | 0.868819888 |
| 0.089675279 | -0.16717177  | 0.003169634 | 5.53E-07    | 0.868819888 |
| 0.089930624 | -0.323892229 | 0.19926681  | 0.0002997   | 0.868819888 |
| 0.089967927 | -0.379660354 | 0.412603306 | 0.001791344 | 0.868819888 |
| 0.090151695 | 0.421959748  | 0.584854032 | 0.005827837 | 0.868819888 |
| 0.090232211 | 0.373717173  | 0.412603306 | 0.001791344 | 0.868819888 |
| 0.090365399 | 0.451102269  | 0.737584497 | 0.011906673 | 0.868819888 |
| 0.090640379 | 0.488550043  | 1           | 0.031639242 | 0.868819888 |
| 0.090640379 | 0.488550043  | 1           | 0.031639242 | 0.868819888 |
| 0.090715767 | 0.346035634  | 0.0008771   | 0.217058541 | 0.868819888 |
| 0.090765261 | 0.563954565  | 0.584854032 | 0.489952655 | 0.868819888 |
| 0.090765261 | 0.563954565  | 0.584854032 | 0.489952655 | 0.868819888 |
| 0.090765261 | 0.563954565  | 0.584854032 | 0.489952655 | 0.868819888 |
| 0.090765261 | 0.563954565  | 0.584854032 | 0.489952655 | 0.868819888 |
| 0.090765261 | 0.563954565  | 0.584854032 | 0.489952655 | 0.868819888 |
| 0.090765261 | 0.563954565  | 0.584854032 | 0.489952655 | 0.868819888 |
| 0.090765261 | 0.563954565  | 0.584854032 | 0.489952655 | 0.868819888 |
| 0.090767153 | -0.454479676 | 0.881481882 | 0.011906673 | 0.868819888 |
| 0.090805759 | 0.522638704  | 0.099208829 | 1           | 0.868819888 |
| 0.091143802 | 0.389335042  | 0.439859057 | 0.002420613 | 0.868819888 |
| 0.091170334 | 0.264099061  | 6.77E-05    | 0.042826979 | 0.868819888 |
| 0.091223582 | -0.198399082 | 0.010835964 | 3.06E-06    | 0.868819888 |
| 0.091355927 | 0.554736564  | 1           | 0.242167012 | 0.868819888 |
| 0.091404778 | 0.561161759  | 0.439859057 | 0.704162183 | 0.868819888 |
| 0.091664898 | -0.5628616   | 0.584854032 | 0.601859652 | 0.868819888 |
| 0.091664898 | -0.5628616   | 0.584854032 | 0.601859652 | 0.868819888 |
| 0.091788944 | -0.558683754 | 0.439859057 | 0.850173656 | 0.868819888 |
| 0.09182446  | -0.345688388 | 0.295435331 | 0.000596242 | 0.868819888 |
| 0.09182446  | -0.345688388 | 0.295435331 | 0.000596242 | 0.868819888 |
| 0.091897776 | 0.320443739  | 0.000467492 | 0.129712192 | 0.868819888 |

|             |              |             |             |             |
|-------------|--------------|-------------|-------------|-------------|
| 0.091982052 | -0.491849532 | 1           | 0.041232736 | 0.868819888 |
| 0.092247349 | -0.265952643 | 0.043105813 | 4.69E-05    | 0.868819888 |
| 0.092289639 | 0.384636911  | 0.439859057 | 0.002093839 | 0.868819888 |
| 0.09249034  | -0.552555082 | 1           | 0.242167012 | 0.868819888 |
| 0.092661956 | -0.561144947 | 0.584854032 | 0.489952655 | 0.868819888 |
| 0.092752629 | 0.440748234  | 0.737584497 | 0.009270366 | 0.868819888 |
| 0.093009828 | 0.077070954  | 1.89E-09    | 4.11E-06    | 0.868819888 |
| 0.093009828 | 0.077070954  | 1.89E-09    | 4.11E-06    | 0.868819888 |
| 0.093189434 | 0.316080553  | 0.000467492 | 0.126792252 | 0.868819888 |
| 0.093306212 | -0.327570503 | 0.205025676 | 0.000324671 | 0.868819888 |
| 0.093387695 | 0.428148085  | 0.584854032 | 0.006372161 | 0.868819888 |
| 0.093751323 | 0.24200771   | 6.19E-05    | 0.025431136 | 0.868819888 |
| 0.093955942 | 0.344760216  | 0.0008771   | 0.217058541 | 0.868819888 |
| 0.094124236 | 0.541083833  | 1           | 0.164911511 | 0.868819888 |
| 0.09430147  | -0.326582167 | 0.205025676 | 0.000324671 | 0.868819888 |
| 0.094796976 | 0.198190058  | 4.58E-06    | 0.006372161 | 0.868819888 |
| 0.094796976 | 0.198190058  | 4.58E-06    | 0.006372161 | 0.868819888 |
| 0.094806491 | -0.261493353 | 0.043105813 | 4.69E-05    | 0.868819888 |
| 0.094806491 | -0.261493353 | 0.043105813 | 4.69E-05    | 0.868819888 |
| 0.094920959 | -0.233958381 | 0.034012327 | 1.04E-05    | 0.868819888 |
| 0.094920959 | -0.233958381 | 0.034012327 | 1.04E-05    | 0.868819888 |
| 0.095057711 | -0.55060632  | 0.989933981 | 0.305102445 | 0.868819888 |
| 0.095108422 | 0.42891868   | 0.584854032 | 0.009270366 | 0.868819888 |
| 0.095153063 | 0.359538463  | 0.001207877 | 0.242167012 | 0.868819888 |
| 0.095191338 | -0.545602076 | 0.307400178 | 1           | 0.868819888 |
| 0.095191338 | -0.545602076 | 0.307400178 | 1           | 0.868819888 |
| 0.095191338 | -0.545602076 | 0.307400178 | 1           | 0.868819888 |
| 0.095222331 | 0.492495878  | 0.066393258 | 1           | 0.868819888 |
| 0.095222331 | 0.492495878  | 0.066393258 | 1           | 0.868819888 |
| 0.095223976 | -0.473535803 | 1           | 0.025431136 | 0.878100647 |
| 0.095773791 | 0.1077713    | 2.78E-08    | 6.41E-05    | 0.878100647 |
| 0.095773791 | 0.1077713    | 2.78E-08    | 6.41E-05    | 0.878100647 |
| 0.095911972 | 0.261694085  | 6.77E-05    | 0.042826979 | 0.878100647 |
| 0.095996965 | 0.552084815  | 0.881481882 | 0.397942841 | 0.878100647 |
| 0.096136998 | 0.28329293   | 0.000189446 | 0.061934943 | 0.878100647 |
| 0.09622951  | -0.478863135 | 1           | 0.031639242 | 0.878100647 |
| 0.096667538 | 0.36989121   | 0.002810027 | 0.364167203 | 0.878100647 |
| 0.096795076 | 0.54362627   | 0.34036444  | 1           | 0.878100647 |
| 0.096926788 | 0.531691176  | 1           | 0.145037597 | 0.878100647 |
| 0.096926788 | 0.531691176  | 1           | 0.145037597 | 0.878100647 |
| 0.097383677 | 0.548965438  | 0.412603306 | 1           | 0.878100647 |
| 0.097383677 | 0.548965438  | 0.412603306 | 1           | 0.878100647 |
| 0.097383677 | 0.548965438  | 0.412603306 | 1           | 0.878100647 |
| 0.097403795 | -0.505609598 | 1           | 0.066020955 | 0.878100647 |
| 0.097574441 | -0.46955062  | 1           | 0.025431136 | 0.878100647 |
| 0.097724817 | -0.471558759 | 1           | 0.029310175 | 0.878100647 |
| 0.097732025 | -0.352487946 | 0.307400178 | 0.001090387 | 0.878100647 |
| 0.09799022  | 0.524515267  | 1           | 0.129712192 | 0.878100647 |
| 0.098047848 | 0.20764343   | 1.22E-05    | 0.009270366 | 0.878100647 |
| 0.098139059 | -0.533184869 | 0.208605117 | 1           | 0.878100647 |
| 0.098360134 | 0.394807483  | 0.008580492 | 0.489952655 | 0.878100647 |
| 0.098504975 | -0.543978023 | 1           | 0.242167012 | 0.878100647 |
| 0.099243308 | 0.250601963  | 6.77E-05    | 0.031639242 | 0.878100647 |
| 0.099311229 | -0.506695045 | 0.095538718 | 1           | 0.878100647 |
| 0.099694494 | 0.53104262   | 1           | 0.164911511 | 0.878100647 |
| 0.099694494 | 0.53104262   | 1           | 0.164911511 | 0.878100647 |
| 0.099982431 | 0.425585498  | 0.584854032 | 0.009270366 | 0.878100647 |
| 0.099982431 | 0.425585498  | 0.584854032 | 0.009270366 | 0.878100647 |
| 0.100235365 | -0.30254194  | 0.169239932 | 0.00028972  | 0.878100647 |
| 0.100256464 | 0.548862716  | 0.584854032 | 0.704162183 | 0.878100647 |
| 0.100294799 | -0.269932649 | 0.075374611 | 7.48E-05    | 0.878100647 |
| 0.100507223 | -0.541150421 | 0.412603306 | 1           | 0.878100647 |
| 0.100507223 | -0.541150421 | 0.412603306 | 1           | 0.878100647 |
| 0.100507223 | -0.541150421 | 0.412603306 | 1           | 0.878100647 |

|             |              |             |             |             |
|-------------|--------------|-------------|-------------|-------------|
| 0.100538475 | -0.377912435 | 0.439859057 | 0.002420613 | 0.878100647 |
| 0.100572667 | 0.145363588  | 4.10E-07    | 0.000997588 | 0.878100647 |
| 0.100642711 | 0.392229965  | 0.439859057 | 0.003736177 | 0.878100647 |
| 0.100874463 | -0.15343112  | 0.001207877 | 5.53E-07    | 0.878100647 |
| 0.101182173 | 0.492445183  | 0.075374611 | 1           | 0.878100647 |
| 0.101182173 | 0.492445183  | 0.075374611 | 1           | 0.878100647 |
| 0.102334357 | 0.510978634  | 1           | 0.126792252 | 0.878100647 |
| 0.102615573 | 0.061889783  | 1.44E-09    | 8.55E-07    | 0.878100647 |
| 0.102780131 | -0.211092361 | 0.018394332 | 9.47E-06    | 0.878100647 |
| 0.102880146 | -0.26947496  | 0.075374611 | 7.48E-05    | 0.878100647 |
| 0.102880146 | -0.26947496  | 0.075374611 | 7.48E-05    | 0.878100647 |
| 0.103119873 | -0.119444249 | 0.000261772 | 9.27E-08    | 0.878100647 |
| 0.103244854 | 0.257140751  | 0.043105813 | 4.69E-05    | 0.878100647 |
| 0.103979711 | 0.33629436   | 0.001207877 | 0.164911511 | 0.878100647 |
| 0.104446683 | -0.522461901 | 1           | 0.164911511 | 0.878100647 |
| 0.104446683 | -0.522461901 | 1           | 0.164911511 | 0.878100647 |
| 0.104446683 | -0.522461901 | 1           | 0.164911511 | 0.878100647 |
| 0.104446683 | -0.522461901 | 1           | 0.164911511 | 0.878100647 |
| 0.104862505 | 0.140254062  | 3.42E-07    | 0.000596242 | 0.878100647 |
| 0.104959776 | 0.128350334  | 1.10E-07    | 0.0002997   | 0.878100647 |
| 0.105216686 | -0.257953478 | 0.043105813 | 4.69E-05    | 0.878100647 |
| 0.105441355 | 0.143146731  | 4.10E-07    | 0.000596242 | 0.878100647 |
| 0.105583268 | 0.175631996  | 3.89E-06    | 0.002420613 | 0.878100647 |
| 0.105583268 | 0.175631996  | 3.89E-06    | 0.002420613 | 0.878100647 |
| 0.105583268 | 0.175631996  | 3.89E-06    | 0.002420613 | 0.878100647 |
| 0.105583268 | 0.175631996  | 3.89E-06    | 0.002420613 | 0.878100647 |
| 0.105583268 | 0.175631996  | 3.89E-06    | 0.002420613 | 0.878100647 |
| 0.105583268 | 0.175631996  | 3.89E-06    | 0.002420613 | 0.878100647 |
| 0.105583268 | 0.175631996  | 3.89E-06    | 0.002420613 | 0.878100647 |
| 0.105672061 | -0.476688778 | 1           | 0.052574033 | 0.878100647 |
| 0.105672061 | -0.476688778 | 1           | 0.052574033 | 0.878100647 |
| 0.105679173 | -0.190146168 | 0.009746439 | 3.16E-06    | 0.878100647 |
| 0.105730155 | 0.158513322  | 1.09E-06    | 0.001791344 | 0.878100647 |
| 0.105741573 | -0.220139424 | 0.026049691 | 1.04E-05    | 0.878100647 |
| 0.105741573 | -0.220139424 | 0.026049691 | 1.04E-05    | 0.878100647 |
| 0.105904287 | 0.395298389  | 0.009746439 | 0.489952655 | 0.878100647 |
| 0.106002925 | 0.423604201  | 0.691111318 | 0.011906673 | 0.878100647 |
| 0.10614822  | 0.538711685  | 0.737584497 | 0.489952655 | 0.878100647 |
| 0.106848858 | -0.280601846 | 0.095006685 | 0.000124759 | 0.878100647 |
| 0.106848858 | -0.280601846 | 0.095006685 | 0.000124759 | 0.878100647 |
| 0.107149645 | -0.538253771 | 0.737584497 | 0.489952655 | 0.878100647 |
| 0.107377609 | 0.499158099  | 1           | 0.10273905  | 0.878100647 |
| 0.107423863 | 0.535054223  | 0.439859057 | 0.850173656 | 0.878100647 |
| 0.107423863 | 0.535054223  | 0.439859057 | 0.850173656 | 0.878100647 |
| 0.107504029 | 0.512314033  | 0.19926681  | 1           | 0.878100647 |
| 0.107749162 | 0.326807493  | 0.205025676 | 0.000997588 | 0.878100647 |
| 0.108451166 | 0.529823292  | 1           | 0.364167203 | 0.878100647 |
| 0.108562008 | -0.340304212 | 0.307400178 | 0.001090387 | 0.878100647 |
| 0.108562008 | -0.340304212 | 0.307400178 | 0.001090387 | 0.878100647 |
| 0.109450341 | 0.496953282  | 1           | 0.10273905  | 0.878100647 |
| 0.109802404 | -0.501848174 | 1           | 0.126792252 | 0.878100647 |
| 0.109926277 | 0.533092146  | 0.439859057 | 0.704162183 | 0.878100647 |
| 0.109926277 | 0.533092146  | 0.439859057 | 0.704162183 | 0.878100647 |
| 0.109962242 | -0.279014844 | 0.095538718 | 0.000124759 | 0.878100647 |
| 0.110079224 | -0.494112935 | 1           | 0.085309726 | 0.878100647 |
| 0.110280093 | -0.533837665 | 0.737584497 | 0.489952655 | 0.878100647 |
| 0.110280093 | -0.533837665 | 0.737584497 | 0.489952655 | 0.878100647 |
| 0.110280093 | -0.533837665 | 0.737584497 | 0.489952655 | 0.878100647 |
| 0.110280093 | -0.533837665 | 0.737584497 | 0.489952655 | 0.878100647 |
| 0.110690635 | -0.418878809 | 0.691111318 | 0.011906673 | 0.878100647 |
| 0.110998463 | -0.353181644 | 0.412603306 | 0.002093839 | 0.878100647 |
| 0.110998463 | -0.353181644 | 0.412603306 | 0.002093839 | 0.878100647 |
| 0.111149492 | 0.527726898  | 1           | 0.364167203 | 0.878100647 |
| 0.111149492 | 0.527726898  | 1           | 0.364167203 | 0.878100647 |
| 0.111204897 | -0.346119793 | 0.349433107 | 0.001791344 | 0.878100647 |

|             |              |             |             |             |
|-------------|--------------|-------------|-------------|-------------|
| 0.111522512 | -0.220424751 | 0.030989574 | 1.65E-05    | 0.878100647 |
| 0.111770815 | 0.056162689  | 1.44E-09    | 5.53E-07    | 0.878100647 |
| 0.111837414 | -0.531577408 | 0.584854032 | 0.704162183 | 0.878100647 |
| 0.111932056 | 0.436209736  | 0.881481882 | 0.02341474  | 0.878100647 |
| 0.112077817 | -0.482948395 | 1           | 0.06824239  | 0.878100647 |
| 0.112077817 | -0.482948395 | 1           | 0.06824239  | 0.878100647 |
| 0.112106003 | 0.398625099  | 0.584854032 | 0.006372161 | 0.878100647 |
| 0.112106003 | 0.398625099  | 0.584854032 | 0.006372161 | 0.878100647 |
| 0.112106003 | 0.398625099  | 0.584854032 | 0.006372161 | 0.878100647 |
| 0.112567321 | -0.254475646 | 0.043105813 | 6.41E-05    | 0.878100647 |
| 0.112567321 | -0.254475646 | 0.043105813 | 6.41E-05    | 0.878100647 |
| 0.113042473 | 0.509094351  | 0.205025676 | 1           | 0.878100647 |
| 0.113202839 | -0.527401755 | 0.881481882 | 0.416730107 | 0.878100647 |
| 0.11320726  | 0.524888583  | 1           | 0.397942841 | 0.878100647 |
| 0.113318572 | -0.528810369 | 0.737584497 | 0.489952655 | 0.878100647 |
| 0.113318572 | -0.528810369 | 0.737584497 | 0.489952655 | 0.878100647 |
| 0.113547248 | -0.494144514 | 1           | 0.126792252 | 0.878100647 |
| 0.113548527 | 0.516590152  | 0.307400178 | 1           | 0.878100647 |
| 0.113838544 | 0.510123621  | 0.295435331 | 1           | 0.878100647 |
| 0.113941631 | -0.495606207 | 0.169239932 | 1           | 0.878100647 |
| 0.11413141  | -0.506289331 | 1           | 0.145037597 | 0.878100647 |
| 0.11413141  | -0.506289331 | 1           | 0.145037597 | 0.878100647 |
| 0.114256263 | -0.262935515 | 0.075374611 | 0.000115129 | 0.878100647 |
| 0.114332986 | 0.386389558  | 0.439859057 | 0.005827837 | 0.878100647 |
| 0.114370497 | -0.269748644 | 0.075374611 | 0.000124759 | 0.878100647 |
| 0.114723477 | 0.380416914  | 0.439859057 | 0.004171959 | 0.878100647 |
| 0.114723477 | 0.380416914  | 0.439859057 | 0.004171959 | 0.878100647 |
| 0.114757991 | -0.226905621 | 0.034012327 | 1.80E-05    | 0.878100647 |
| 0.114757991 | -0.226905621 | 0.034012327 | 1.80E-05    | 0.878100647 |
| 0.114934257 | 0.116188636  | 9.36E-08    | 0.000124759 | 0.878100647 |
| 0.115155477 | -0.206583635 | 0.018394332 | 9.47E-06    | 0.878100647 |
| 0.115155477 | -0.206583635 | 0.018394332 | 9.47E-06    | 0.878100647 |
| 0.115271668 | 0.488632228  | 1           | 0.102782106 | 0.878100647 |
| 0.11536966  | -0.305777343 | 0.192696374 | 0.000348916 | 0.878100647 |
| 0.115383067 | -0.512782175 | 1           | 0.242167012 | 0.878100647 |
| 0.115387649 | 0.077615747  | 7.89E-09    | 5.99E-06    | 0.878100647 |
| 0.11543151  | 0.465987479  | 1           | 0.053084396 | 0.878100647 |
| 0.11543151  | 0.465987479  | 1           | 0.053084396 | 0.878100647 |
| 0.115449014 | -0.153057416 | 0.001207877 | 8.55E-07    | 0.878100647 |
| 0.115449014 | -0.153057416 | 0.001207877 | 8.55E-07    | 0.878100647 |
| 0.11586462  | -0.524838214 | 0.439859057 | 0.850173656 | 0.878100647 |
| 0.116846569 | 0.211030004  | 6.10E-05    | 0.011906673 | 0.878100647 |
| 0.117325172 | 0.253430473  | 0.000155445 | 0.042826979 | 0.878100647 |
| 0.117325172 | 0.253430473  | 0.000155445 | 0.042826979 | 0.878100647 |
| 0.117666078 | -0.292391588 | 0.169239932 | 0.0002997   | 0.878100647 |
| 0.118210574 | 0.405390217  | 0.584854032 | 0.009270366 | 0.878100647 |
| 0.118210574 | 0.405390217  | 0.584854032 | 0.009270366 | 0.878100647 |
| 0.118559517 | -0.522823748 | 0.584854032 | 0.704162183 | 0.878100647 |
| 0.118664272 | -0.389432803 | 0.584854032 | 0.006372161 | 0.878100647 |
| 0.119592856 | 0.511177417  | 1           | 0.242167012 | 0.878100647 |
| 0.120132987 | -0.474494134 | 1           | 0.085309726 | 0.878100647 |
| 0.120268706 | 0.131487648  | 0.0008771   | 2.98E-07    | 0.878100647 |
| 0.120268706 | 0.131487648  | 0.0008771   | 2.98E-07    | 0.878100647 |
| 0.120355546 | 0.430237924  | 0.881481882 | 0.025431136 | 0.878100647 |
| 0.120476273 | 0.190621212  | 1.22E-05    | 0.006372161 | 0.878100647 |
| 0.120504152 | -0.520311555 | 0.584854032 | 0.645935818 | 0.878100647 |
| 0.120504152 | -0.520311555 | 0.584854032 | 0.645935818 | 0.878100647 |
| 0.120643852 | 0.320378209  | 0.208605117 | 0.001090387 | 0.878100647 |
| 0.120643852 | 0.320378209  | 0.208605117 | 0.001090387 | 0.878100647 |
| 0.120691056 | -0.506590403 | 1           | 0.242167012 | 0.878100647 |
| 0.120691056 | -0.506590403 | 1           | 0.242167012 | 0.878100647 |
| 0.121182083 | 0.485329113  | 1           | 0.126792252 | 0.878100647 |
| 0.12120706  | -0.517637617 | 0.737584497 | 0.489952655 | 0.878100647 |
| 0.12120706  | -0.517637617 | 0.737584497 | 0.489952655 | 0.878100647 |

|             |              |             |             |             |
|-------------|--------------|-------------|-------------|-------------|
| 0.121618682 | 0.153141466  | 0.001207877 | 8.55E-07    | 0.878100647 |
| 0.121618682 | 0.153141466  | 0.001207877 | 8.55E-07    | 0.878100647 |
| 0.121618682 | 0.153141466  | 0.001207877 | 8.55E-07    | 0.878100647 |
| 0.121618682 | 0.153141466  | 0.001207877 | 8.55E-07    | 0.878100647 |
| 0.121628197 | 0.461157576  | 0.075374611 | 1           | 0.878100647 |
| 0.121695412 | 0.49437427   | 0.205025676 | 1           | 0.878100647 |
| 0.121724249 | -0.233945413 | 0.035148121 | 4.69E-05    | 0.878100647 |
| 0.12173261  | 0.516121974  | 0.439859057 | 0.850173656 | 0.878100647 |
| 0.121745071 | 0.411892631  | 0.737584497 | 0.017403168 | 0.878100647 |
| 0.121932197 | 0.475540935  | 1           | 0.085309726 | 0.878100647 |
| 0.121969633 | -0.136782908 | 0.0008771   | 2.98E-07    | 0.878100647 |
| 0.122128842 | -0.325444263 | 0.295435331 | 0.001090387 | 0.878100647 |
| 0.122128842 | -0.325444263 | 0.295435331 | 0.001090387 | 0.878100647 |
| 0.122242981 | -0.47291578  | 1           | 0.085309726 | 0.878100647 |
| 0.122242981 | -0.47291578  | 1           | 0.085309726 | 0.878100647 |
| 0.122362545 | 0.450223818  | 0.066393258 | 1           | 0.878100647 |
| 0.122462411 | -0.449987972 | 1           | 0.049298372 | 0.878100647 |
| 0.122462411 | -0.449987972 | 1           | 0.049298372 | 0.878100647 |
| 0.122665709 | -0.509665403 | 0.412603306 | 1           | 0.878100647 |
| 0.12284578  | 0.471122814  | 1           | 0.085309726 | 0.878100647 |
| 0.122902782 | 0.32435286   | 0.001207877 | 0.164911511 | 0.878100647 |
| 0.123307684 | 0.163647891  | 3.89E-06    | 0.002093839 | 0.878100647 |
| 0.123510445 | 0.510956151  | 0.439859057 | 1           | 0.878100647 |
| 0.123713778 | -0.474368059 | 1           | 0.085309726 | 0.878100647 |
| 0.123967272 | -0.494361377 | 1           | 0.164911511 | 0.878100647 |
| 0.123985246 | -0.320800784 | 0.295435331 | 0.001090387 | 0.878100647 |
| 0.124027635 | 0.484166954  | 0.192696374 | 1           | 0.878100647 |
| 0.124067005 | 0.500422437  | 1           | 0.242167012 | 0.878100647 |
| 0.124067005 | 0.500422437  | 1           | 0.242167012 | 0.878100647 |
| 0.12474547  | -0.514385268 | 0.737584497 | 0.489952655 | 0.878100647 |
| 0.124782775 | 0.505834228  | 1           | 0.305102445 | 0.878100647 |
| 0.124937744 | 0.312361677  | 0.001207877 | 0.145037597 | 0.878100647 |
| 0.124969956 | -0.384215899 | 0.584854032 | 0.006372161 | 0.878100647 |
| 0.12554089  | 0.511459105  | 0.881481882 | 0.489952655 | 0.878100647 |
| 0.125700898 | -0.272022617 | 0.095538718 | 0.000163543 | 0.878100647 |
| 0.125700898 | -0.272022617 | 0.095538718 | 0.000163543 | 0.878100647 |
| 0.126025509 | -0.152069863 | 0.001207877 | 8.55E-07    | 0.878100647 |
| 0.126337978 | -0.509994381 | 0.439859057 | 1           | 0.878100647 |
| 0.126448335 | -0.133310117 | 0.0008771   | 2.98E-07    | 0.878100647 |
| 0.126448335 | -0.133310117 | 0.0008771   | 2.98E-07    | 0.878100647 |
| 0.126532883 | 0.393924461  | 0.584854032 | 0.009270366 | 0.878100647 |
| 0.126532883 | 0.393924461  | 0.584854032 | 0.009270366 | 0.878100647 |
| 0.126532883 | 0.393924461  | 0.584854032 | 0.009270366 | 0.878100647 |
| 0.12653641  | -0.426721989 | 0.881481882 | 0.025431136 | 0.878100647 |
| 0.126814824 | 0.507880074  | 0.989933981 | 0.416730107 | 0.878100647 |
| 0.126814824 | 0.507880074  | 0.989933981 | 0.416730107 | 0.878100647 |
| 0.126831234 | 0.453564375  | 1           | 0.060775899 | 0.878100647 |
| 0.127070969 | 0.504236263  | 1           | 0.364167203 | 0.878100647 |
| 0.127128688 | -0.287835861 | 0.169239932 | 0.000324671 | 0.878100647 |
| 0.127213927 | 0.169065597  | 4.58E-06    | 0.002420613 | 0.878100647 |
| 0.127248557 | -0.261947907 | 0.075374611 | 0.000124759 | 0.878100647 |
| 0.127248557 | -0.261947907 | 0.075374611 | 0.000124759 | 0.878100647 |
| 0.127248557 | -0.261947907 | 0.075374611 | 0.000124759 | 0.878100647 |
| 0.127343338 | 0.390036327  | 0.584854032 | 0.009270366 | 0.878100647 |
| 0.12734378  | 0.49892606   | 1           | 0.242167012 | 0.878100647 |
| 0.127494512 | -0.167230052 | 0.004526275 | 3.06E-06    | 0.878100647 |
| 0.127749285 | 0.499343008  | 1           | 0.242167012 | 0.878100647 |
| 0.127749285 | 0.499343008  | 1           | 0.242167012 | 0.878100647 |
| 0.127970376 | -0.230532726 | 0.035148121 | 4.69E-05    | 0.878100647 |
| 0.127970376 | -0.230532726 | 0.035148121 | 4.69E-05    | 0.878100647 |
| 0.127970376 | -0.230532726 | 0.035148121 | 4.69E-05    | 0.878100647 |
| 0.127970376 | -0.230532726 | 0.035148121 | 4.69E-05    | 0.878100647 |
| 0.128081002 | 0.504673547  | 0.439859057 | 1           | 0.878100647 |
| 0.128129253 | 0.479962685  | 1           | 0.145037597 | 0.878100647 |



|             |              |             |             |             |
|-------------|--------------|-------------|-------------|-------------|
| 0.128149603 | 0.499460186  | 1           | 0.242167012 | 0.878100647 |
| 0.128149603 | 0.499460186  | 1           | 0.242167012 | 0.878100647 |
| 0.128269716 | -0.066853033 | 4.58E-06    | 3.90E-09    | 0.878100647 |
| 0.128269716 | -0.066853033 | 4.58E-06    | 3.90E-09    | 0.878100647 |
| 0.128269716 | -0.066853033 | 4.58E-06    | 3.90E-09    | 0.878100647 |
| 0.128487881 | 0.494036502  | 1           | 0.242167012 | 0.878100647 |
| 0.128791666 | -0.189433698 | 0.016023223 | 9.47E-06    | 0.878100647 |
| 0.128791666 | -0.189433698 | 0.016023223 | 9.47E-06    | 0.878100647 |
| 0.129276261 | -0.508763072 | 0.691111318 | 0.601859652 | 0.878100647 |
| 0.129637284 | 0.384556735  | 0.018163994 | 0.489952655 | 0.878100647 |
| 0.129637284 | 0.384556735  | 0.018163994 | 0.489952655 | 0.878100647 |
| 0.129789531 | 0.174273615  | 5.98E-06    | 0.003736177 | 0.878100647 |
| 0.129867106 | -0.24347147  | 0.043105813 | 7.48E-05    | 0.878100647 |
| 0.129933743 | -0.441957554 | 1           | 0.052574033 | 0.878100647 |
| 0.129955719 | -0.318662303 | 0.295435331 | 0.001090387 | 0.878100647 |
| 0.129955719 | -0.318662303 | 0.295435331 | 0.001090387 | 0.878100647 |
| 0.129982261 | -0.153493384 | 0.002297238 | 8.55E-07    | 0.878100647 |
| 0.129982261 | -0.153493384 | 0.002297238 | 8.55E-07    | 0.878100647 |
| 0.129982261 | -0.153493384 | 0.002297238 | 8.55E-07    | 0.878100647 |
| 0.130090593 | -0.230615059 | 0.035148121 | 4.69E-05    | 0.878100647 |
| 0.130150847 | 0.1589408    | 3.58E-06    | 0.002093839 | 0.878100647 |
| 0.130153234 | -0.461165726 | 1           | 0.085309726 | 0.878100647 |
| 0.1302457   | 0.502317242  | 1           | 0.397942841 | 0.878100647 |
| 0.1302457   | 0.502317242  | 1           | 0.397942841 | 0.878100647 |
| 0.13025497  | 0.271690084  | 0.095538718 | 0.0002997   | 0.878100647 |
| 0.130328928 | 0.504939846  | 0.88322726  | 0.489952655 | 0.878100647 |
| 0.130354676 | -0.326418058 | 0.307400178 | 0.001791344 | 0.878100647 |
| 0.130432808 | -0.497231128 | 1           | 0.242167012 | 0.878100647 |
| 0.130432808 | -0.497231128 | 1           | 0.242167012 | 0.878100647 |
| 0.130456269 | 0.345111522  | 0.412603306 | 0.002420613 | 0.878100647 |
| 0.130483814 | 0.20971326   | 6.19E-05    | 0.011906673 | 0.878100647 |
| 0.130658498 | -0.44970941  | 0.075374611 | 1           | 0.878100647 |
| 0.13087018  | -0.160983297 | 0.004273917 | 3.06E-06    | 0.878100647 |
| 0.130976697 | 0.188644655  | 1.22E-05    | 0.006372161 | 0.878100647 |
| 0.131139852 | -0.213831155 | 0.030989574 | 2.13E-05    | 0.878100647 |
| 0.131657746 | -0.24587755  | 0.043105813 | 0.000115129 | 0.878100647 |
| 0.131657746 | -0.24587755  | 0.043105813 | 0.000115129 | 0.878100647 |
| 0.131680136 | -0.431217135 | 1           | 0.031639242 | 0.878100647 |
| 0.131758881 | -0.321341395 | 0.307400178 | 0.001791344 | 0.878100647 |
| 0.131860007 | -0.259721417 | 0.075374611 | 0.000124759 | 0.878100647 |
| 0.131887097 | 0.449341034  | 1           | 0.060775899 | 0.878100647 |
| 0.132033807 | -0.190005159 | 0.016023223 | 9.47E-06    | 0.878100647 |
| 0.132072774 | 0.182518007  | 1.22E-05    | 0.005827837 | 0.878100647 |
| 0.132254564 | -0.477218506 | 1           | 0.145037597 | 0.878100647 |
| 0.132254564 | -0.477218506 | 1           | 0.145037597 | 0.878100647 |
| 0.132449915 | -0.402632905 | 0.737584497 | 0.02341474  | 0.878100647 |
| 0.132500832 | -0.122138454 | 0.000467492 | 2.98E-07    | 0.878100647 |
| 0.132500832 | -0.122138454 | 0.000467492 | 2.98E-07    | 0.878100647 |
| 0.132500832 | -0.122138454 | 0.000467492 | 2.98E-07    | 0.878100647 |
| 0.132877057 | -0.361094511 | 0.439859057 | 0.005827837 | 0.878100647 |
| 0.133235104 | 0.492507871  | 1           | 0.242167012 | 0.878100647 |
| 0.133417733 | 0.439019278  | 0.073031096 | 1           | 0.878100647 |
| 0.133536217 | -0.182462719 | 0.009746439 | 5.99E-06    | 0.878100647 |
| 0.133536217 | -0.182462719 | 0.009746439 | 5.99E-06    | 0.878100647 |
| 0.13420444  | -0.369438202 | 0.439859057 | 0.006372161 | 0.878100647 |
| 0.13420444  | -0.369438202 | 0.439859057 | 0.006372161 | 0.878100647 |
| 0.135272239 | 0.406215517  | 0.737584497 | 0.02341474  | 0.878100647 |
| 0.135452132 | 0.438053872  | 1           | 0.053084396 | 0.878100647 |
| 0.135629284 | 0.35757948   | 0.009746439 | 0.416730107 | 0.878100647 |
| 0.135711304 | -0.370754714 | 0.439859057 | 0.006372161 | 0.878100647 |
| 0.135741086 | 0.291721567  | 0.169239932 | 0.000596242 | 0.878100647 |
| 0.136805527 | 0.403375489  | 0.737584497 | 0.02341474  | 0.878100647 |
| 0.136989506 | 0.498061607  | 0.881481882 | 0.489952655 | 0.878100647 |
| 0.137358963 | -0.465608794 | 1           | 0.126792252 | 0.878100647 |

|             |              |             |             |             |
|-------------|--------------|-------------|-------------|-------------|
| 0.137358963 | -0.465608794 | 1           | 0.126792252 | 0.878100647 |
| 0.137591449 | 0.41691653   | 0.043105813 | 1           | 0.878100647 |
| 0.137741675 | 0.321917158  | 0.307400178 | 0.002093839 | 0.878100647 |
| 0.137741675 | 0.321917158  | 0.307400178 | 0.002093839 | 0.878100647 |
| 0.13781434  | 0.121651004  | 3.18E-07    | 0.0002997   | 0.878100647 |
| 0.13781434  | 0.121651004  | 3.18E-07    | 0.0002997   | 0.878100647 |
| 0.13781434  | 0.121651004  | 3.18E-07    | 0.0002997   | 0.878100647 |
| 0.137919568 | -0.455468059 | 0.134257478 | 1           | 0.878100647 |
| 0.137919568 | -0.455468059 | 0.134257478 | 1           | 0.878100647 |
| 0.137992642 | -0.392440419 | 0.584854032 | 0.017403168 | 0.878100647 |
| 0.13854297  | 0.156169843  | 4.58E-06    | 0.002093839 | 0.878100647 |
| 0.138662738 | 0.484397466  | 0.412603306 | 1           | 0.878100647 |
| 0.138784814 | -0.277922942 | 0.134257478 | 0.000324671 | 0.878100647 |
| 0.138891743 | -0.134050818 | 0.0008771   | 5.53E-07    | 0.878100647 |
| 0.139278202 | -0.478967538 | 0.307400178 | 1           | 0.878100647 |
| 0.139283287 | 0.407229892  | 0.737584497 | 0.025431136 | 0.878100647 |
| 0.139359254 | -0.477772798 | 1           | 0.242167012 | 0.878100647 |
| 0.139480241 | -0.371829414 | 0.493333254 | 0.009270366 | 0.878100647 |
| 0.139480241 | -0.371829414 | 0.493333254 | 0.009270366 | 0.878100647 |
| 0.139653052 | -0.48958886  | 0.439859057 | 1           | 0.878100647 |
| 0.140201173 | -0.366589037 | 0.439859057 | 0.006372161 | 0.878100647 |
| 0.140450348 | 0.346522758  | 0.412603306 | 0.003736177 | 0.878100647 |
| 0.140450348 | 0.346522758  | 0.412603306 | 0.003736177 | 0.878100647 |
| 0.140450348 | 0.346522758  | 0.412603306 | 0.003736177 | 0.878100647 |
| 0.140478365 | 0.452315366  | 0.134257478 | 1           | 0.878100647 |
| 0.140508486 | -0.483303328 | 1           | 0.242167012 | 0.878100647 |
| 0.140650244 | 0.466291786  | 1           | 0.145037597 | 0.878100647 |
| 0.140832051 | 0.233067135  | 0.000155445 | 0.031639242 | 0.878100647 |
| 0.141103718 | 0.410357422  | 0.881481882 | 0.029310175 | 0.878100647 |
| 0.141193304 | -0.420271281 | 0.989933981 | 0.041232736 | 0.878100647 |
| 0.141231876 | -0.469625476 | 1           | 0.145037597 | 0.878100647 |
| 0.141363634 | -0.473888214 | 1           | 0.217058541 | 0.878100647 |
| 0.141363634 | -0.473888214 | 1           | 0.217058541 | 0.878100647 |
| 0.141363634 | -0.473888214 | 1           | 0.217058541 | 0.878100647 |
| 0.141456334 | -0.226057797 | 0.035148121 | 4.69E-05    | 0.878100647 |
| 0.141482294 | 0.47951939   | 1           | 0.242167012 | 0.878100647 |
| 0.141759823 | -0.488290993 | 1           | 0.416730107 | 0.878100647 |
| 0.142424331 | 0.388475872  | 0.584854032 | 0.017403168 | 0.878100647 |
| 0.142652083 | -0.492493921 | 0.584854032 | 0.704162183 | 0.878100647 |
| 0.143146294 | 0.491911434  | 0.584854032 | 0.704162183 | 0.878100647 |
| 0.143399102 | 0.087197354  | 2.78E-08    | 1.80E-05    | 0.878100647 |
| 0.143399102 | 0.087197354  | 2.78E-08    | 1.80E-05    | 0.878100647 |
| 0.143494215 | -0.439408975 | 1           | 0.066020955 | 0.878100647 |
| 0.143494215 | -0.439408975 | 1           | 0.066020955 | 0.878100647 |
| 0.143876431 | -0.286413728 | 0.169239932 | 0.000596242 | 0.878100647 |
| 0.143897905 | -0.487949043 | 0.989933981 | 0.489952655 | 0.878100647 |
| 0.143897905 | -0.487949043 | 0.989933981 | 0.489952655 | 0.878100647 |
| 0.144198612 | -0.481034882 | 1           | 0.364167203 | 0.878100647 |
| 0.144433235 | -0.362410527 | 0.439859057 | 0.006372161 | 0.878100647 |
| 0.144503858 | -0.257897768 | 0.087427713 | 0.00028972  | 0.878100647 |
| 0.144525678 | 0.459493329  | 0.19926681  | 1           | 0.878100647 |
| 0.144525678 | 0.459493329  | 0.19926681  | 1           | 0.878100647 |
| 0.144945321 | -0.145700945 | 0.001207877 | 8.55E-07    | 0.878100647 |
| 0.144945321 | -0.145700945 | 0.001207877 | 8.55E-07    | 0.878100647 |
| 0.145144879 | 0.143558463  | 0.001207877 | 8.55E-07    | 0.878100647 |
| 0.145213047 | 0.38841747   | 0.584854032 | 0.02341474  | 0.878100647 |
| 0.145337591 | -0.11275984  | 0.000261772 | 2.98E-07    | 0.878100647 |
| 0.145337591 | -0.11275984  | 0.000261772 | 2.98E-07    | 0.878100647 |
| 0.145537654 | -0.289489495 | 0.192696374 | 0.000997588 | 0.878100647 |
| 0.145537654 | -0.289489495 | 0.192696374 | 0.000997588 | 0.878100647 |
| 0.145678679 | 0.405077796  | 0.03951775  | 0.850173656 | 0.878100647 |
| 0.145696598 | -0.487657954 | 0.584854032 | 0.850173656 | 0.878100647 |
| 0.14582844  | -0.31569066  | 0.307400178 | 0.002093839 | 0.878100647 |
| 0.145868659 | 0.129955167  | 1.09E-06    | 0.000596242 | 0.878100647 |

|             |              |             |             |             |
|-------------|--------------|-------------|-------------|-------------|
| 0.146279271 | -0.286430749 | 0.169239932 | 0.000997588 | 0.878100647 |
| 0.146367277 | 0.463281146  | 1           | 0.145037597 | 0.878100647 |
| 0.146711196 | -0.449206733 | 1           | 0.126792252 | 0.878100647 |
| 0.14674078  | -0.485285018 | 0.989933981 | 0.489952655 | 0.878100647 |
| 0.146931595 | 0.486938869  | 0.584854032 | 0.704162183 | 0.878100647 |
| 0.146947389 | -0.421530211 | 1           | 0.053084396 | 0.878100647 |
| 0.14764918  | 0.394531313  | 0.737584497 | 0.025431136 | 0.878100647 |
| 0.147885134 | 0.458942801  | 0.205025676 | 1           | 0.878100647 |
| 0.147919863 | 0.431225799  | 1           | 0.061934943 | 0.878100647 |
| 0.148200545 | 0.235528422  | 0.043105813 | 0.000115129 | 0.878100647 |
| 0.148200545 | 0.235528422  | 0.043105813 | 0.000115129 | 0.878100647 |
| 0.148670983 | 0.476334118  | 0.412603306 | 1           | 0.878100647 |
| 0.148670983 | 0.476334118  | 0.412603306 | 1           | 0.878100647 |
| 0.148856587 | 0.141910475  | 1.84E-06    | 0.001090387 | 0.878100647 |
| 0.148856587 | 0.141910475  | 1.84E-06    | 0.001090387 | 0.878100647 |
| 0.149220233 | -0.221958237 | 0.035148121 | 6.41E-05    | 0.878100647 |
| 0.149385534 | -0.182340808 | 0.010835964 | 9.47E-06    | 0.878100647 |
| 0.149385534 | -0.182340808 | 0.010835964 | 9.47E-06    | 0.878100647 |
| 0.149385534 | -0.182340808 | 0.010835964 | 9.47E-06    | 0.878100647 |
| 0.149593921 | 0.271820776  | 0.104319013 | 0.000348916 | 0.878100647 |
| 0.149593921 | 0.271820776  | 0.104319013 | 0.000348916 | 0.878100647 |
| 0.149593921 | 0.271820776  | 0.104319013 | 0.000348916 | 0.878100647 |
| 0.149593921 | 0.271820776  | 0.104319013 | 0.000348916 | 0.878100647 |
| 0.14966333  | 0.256209514  | 0.000467492 | 0.060775899 | 0.878100647 |
| 0.149687945 | -0.474158615 | 1           | 0.364167203 | 0.878100647 |
| 0.149723612 | -0.183091111 | 0.010835964 | 9.47E-06    | 0.878100647 |
| 0.149875791 | -0.35346651  | 0.439859057 | 0.006372161 | 0.878100647 |
| 0.149875791 | -0.35346651  | 0.439859057 | 0.006372161 | 0.878100647 |
| 0.149875791 | -0.35346651  | 0.439859057 | 0.006372161 | 0.878100647 |
| 0.149881035 | 0.327164168  | 0.006343149 | 0.242167012 | 0.878100647 |
| 0.149881035 | 0.327164168  | 0.006343149 | 0.242167012 | 0.878100647 |
| 0.150337718 | -0.463353675 | 1           | 0.242167012 | 0.878100647 |
| 0.15047952  | -0.325518749 | 0.412603306 | 0.002721298 | 0.878100647 |
| 0.151591878 | -0.39065206  | 0.737584497 | 0.025431136 | 0.878100647 |
| 0.151591878 | -0.39065206  | 0.737584497 | 0.025431136 | 0.878100647 |
| 0.151606064 | -0.474061331 | 1           | 0.364167203 | 0.878100647 |
| 0.151606064 | -0.474061331 | 1           | 0.364167203 | 0.878100647 |
| 0.151915595 | 0.439675468  | 1           | 0.10273905  | 0.878100647 |
| 0.151915595 | 0.439675468  | 1           | 0.10273905  | 0.878100647 |
| 0.152016334 | 0.22211717   | 0.000155445 | 0.025431136 | 0.878100647 |
| 0.152016334 | 0.22211717   | 0.000155445 | 0.025431136 | 0.878100647 |
| 0.152280952 | 0.47041093   | 1           | 0.305102445 | 0.878100647 |
| 0.152280952 | 0.47041093   | 1           | 0.305102445 | 0.878100647 |
| 0.152529218 | 0.436293752  | 0.104319013 | 1           | 0.878100647 |
| 0.152549595 | 0.435219319  | 1           | 0.085309726 | 0.878100647 |
| 0.152610357 | 0.090949973  | 4.36E-08    | 4.69E-05    | 0.878100647 |
| 0.152610357 | 0.090949973  | 4.36E-08    | 4.69E-05    | 0.878100647 |
| 0.152900555 | -0.317350419 | 0.307400178 | 0.002420613 | 0.878100647 |
| 0.153000545 | -0.294840227 | 0.205025676 | 0.001090387 | 0.878100647 |
| 0.153244006 | 0.463426484  | 1           | 0.242167012 | 0.878100647 |
| 0.153631589 | -0.073490385 | 1.22E-05    | 9.50E-09    | 0.878100647 |
| 0.153631589 | -0.073490385 | 1.22E-05    | 9.50E-09    | 0.878100647 |
| 0.153631589 | -0.073490385 | 1.22E-05    | 9.50E-09    | 0.878100647 |
| 0.154006985 | -0.288640162 | 0.19926681  | 0.001090387 | 0.878100647 |
| 0.154050059 | -0.472850666 | 1           | 0.397942841 | 0.878100647 |
| 0.154066453 | -0.35964879  | 0.439859057 | 0.009270366 | 0.878100647 |
| 0.154086432 | -0.478480085 | 0.881481882 | 0.489952655 | 0.878100647 |
| 0.154157517 | -0.397947844 | 0.737584497 | 0.031639242 | 0.878100647 |
| 0.15460564  | -0.478284451 | 0.737584497 | 0.601859652 | 0.878100647 |
| 0.154676613 | -0.186414331 | 0.016023223 | 1.29E-05    | 0.878100647 |
| 0.154676613 | -0.186414331 | 0.016023223 | 1.29E-05    | 0.878100647 |
| 0.154676613 | -0.186414331 | 0.016023223 | 1.29E-05    | 0.878100647 |
| 0.154676613 | -0.186414331 | 0.016023223 | 1.29E-05    | 0.878100647 |
| 0.154714858 | -0.348220743 | 0.439859057 | 0.006372161 | 0.878100647 |

|             |              |             |             |             |
|-------------|--------------|-------------|-------------|-------------|
| 0.155224186 | -0.226210574 | 0.043105813 | 0.000115129 | 0.878100647 |
| 0.155681889 | 0.264056347  | 0.095538718 | 0.000324671 | 0.878100647 |
| 0.155681889 | 0.264056347  | 0.095538718 | 0.000324671 | 0.878100647 |
| 0.155692425 | 0.468448761  | 0.412603306 | 1           | 0.878100647 |
| 0.155899028 | 0.302571545  | 0.295435331 | 0.001791344 | 0.878100647 |
| 0.155902028 | 0.477312667  | 0.691111318 | 0.704162183 | 0.878100647 |
| 0.156078624 | -0.366500989 | 0.584854032 | 0.011906673 | 0.878100647 |
| 0.156104936 | 0.299747159  | 0.002297238 | 0.145037597 | 0.878100647 |
| 0.156104936 | 0.299747159  | 0.002297238 | 0.145037597 | 0.878100647 |
| 0.156225071 | 0.417828976  | 0.075374611 | 1           | 0.878100647 |
| 0.156225071 | 0.417828976  | 0.075374611 | 1           | 0.878100647 |
| 0.156743077 | -0.132004602 | 0.0008771   | 8.55E-07    | 0.878100647 |
| 0.156996255 | -0.412304634 | 1           | 0.053084396 | 0.878100647 |
| 0.157260941 | -0.239366286 | 0.066393258 | 0.000124759 | 0.878100647 |
| 0.157281028 | -0.313816614 | 0.307400178 | 0.002420613 | 0.878100647 |
| 0.157281028 | -0.313816614 | 0.307400178 | 0.002420613 | 0.878100647 |
| 0.157341199 | -0.179819905 | 0.010835964 | 9.47E-06    | 0.878100647 |
| 0.157341199 | -0.179819905 | 0.010835964 | 9.47E-06    | 0.878100647 |
| 0.157341199 | -0.179819905 | 0.010835964 | 9.47E-06    | 0.878100647 |
| 0.157341199 | -0.179819905 | 0.010835964 | 9.47E-06    | 0.878100647 |
| 0.157341199 | -0.179819905 | 0.010835964 | 9.47E-06    | 0.878100647 |
| 0.157341199 | -0.179819905 | 0.010835964 | 9.47E-06    | 0.878100647 |
| 0.157341199 | -0.179819905 | 0.010835964 | 9.47E-06    | 0.878100647 |
| 0.157341199 | -0.179819905 | 0.010835964 | 9.47E-06    | 0.878100647 |
| 0.157725943 | -0.186851033 | 0.018163994 | 1.65E-05    | 0.878100647 |
| 0.157744966 | 0.404696057  | 0.043105813 | 1           | 0.878100647 |
| 0.157744966 | 0.404696057  | 0.043105813 | 1           | 0.878100647 |
| 0.15781594  | 0.440076806  | 1           | 0.126792252 | 0.878100647 |
| 0.157909667 | 0.400862363  | 0.881481882 | 0.041232736 | 0.878100647 |
| 0.158010515 | 0.25004573   | 0.000467492 | 0.060775899 | 0.878100647 |
| 0.158280964 | 0.111460257  | 3.18E-07    | 0.000140627 | 0.878100647 |
| 0.158558553 | -0.421902514 | 1           | 0.066020955 | 0.878100647 |
| 0.158558553 | -0.421902514 | 1           | 0.066020955 | 0.878100647 |
| 0.158833494 | -0.155455895 | 0.004273917 | 3.16E-06    | 0.878100647 |
| 0.158833494 | -0.155455895 | 0.004273917 | 3.16E-06    | 0.878100647 |
| 0.159609956 | 0.394135271  | 0.814576593 | 0.031639242 | 0.878100647 |
| 0.159961603 | -0.464090401 | 1           | 0.364167203 | 0.878100647 |
| 0.159961603 | -0.464090401 | 1           | 0.364167203 | 0.878100647 |
| 0.159961603 | -0.464090401 | 1           | 0.364167203 | 0.878100647 |
| 0.160108809 | -0.291777107 | 0.205025676 | 0.001791344 | 0.878100647 |
| 0.160402075 | -0.275631782 | 0.169239932 | 0.000997588 | 0.878100647 |
| 0.160826495 | -0.274854612 | 0.169239932 | 0.000997588 | 0.878100647 |
| 0.160834469 | 0.359594958  | 0.584854032 | 0.011906673 | 0.878100647 |
| 0.160834469 | 0.359594958  | 0.584854032 | 0.011906673 | 0.878100647 |
| 0.160834469 | 0.359594958  | 0.584854032 | 0.011906673 | 0.878100647 |
| 0.161529852 | 0.461292656  | 1           | 0.364167203 | 0.878100647 |
| 0.161529852 | 0.461292656  | 1           | 0.364167203 | 0.878100647 |
| 0.161553992 | 0.454224956  | 1           | 0.242167012 | 0.878100647 |
| 0.161711111 | 0.37574008   | 0.034012327 | 0.704162183 | 0.878100647 |
| 0.16204023  | -0.425257788 | 1           | 0.085309726 | 0.878100647 |
| 0.162391314 | -0.251461896 | 0.087427713 | 0.000324671 | 0.878100647 |
| 0.162787239 | 0.463916945  | 1           | 0.416730107 | 0.878100647 |
| 0.162988933 | -0.181180212 | 0.016023223 | 1.04E-05    | 0.878100647 |
| 0.162988933 | -0.181180212 | 0.016023223 | 1.04E-05    | 0.878100647 |
| 0.163085955 | 0.45802001   | 0.412603306 | 1           | 0.878100647 |
| 0.163085955 | 0.45802001   | 0.412603306 | 1           | 0.878100647 |
| 0.163235939 | -0.403823876 | 1           | 0.053084396 | 0.878100647 |
| 0.163483998 | -0.246979695 | 0.075374611 | 0.0002997   | 0.878100647 |
| 0.163761703 | -0.425614814 | 1           | 0.10273905  | 0.878100647 |
| 0.164128892 | 0.468135779  | 0.584854032 | 0.704162183 | 0.878100647 |
| 0.164128892 | 0.468135779  | 0.584854032 | 0.704162183 | 0.878100647 |
| 0.164128892 | 0.468135779  | 0.584854032 | 0.704162183 | 0.878100647 |
| 0.164128892 | 0.468135779  | 0.584854032 | 0.704162183 | 0.878100647 |
| 0.164161112 | 0.452787223  | 1           | 0.242167012 | 0.878100647 |
| 0.164161112 | 0.452787223  | 1           | 0.242167012 | 0.878100647 |
| 0.164612927 | -0.139502224 | 0.001207877 | 3.06E-06    | 0.878100647 |

|             |              |             |             |             |
|-------------|--------------|-------------|-------------|-------------|
| 0.164690527 | -0.335817151 | 0.439859057 | 0.006372161 | 0.878100647 |
| 0.164767246 | 0.038923762  | 1.97E-10    | 9.27E-08    | 0.878100647 |
| 0.164767246 | 0.038923762  | 1.97E-10    | 9.27E-08    | 0.878100647 |
| 0.164999683 | 0.467105657  | 0.584854032 | 0.850173656 | 0.878100647 |
| 0.165208295 | 0.377149398  | 0.691111318 | 0.025431136 | 0.878100647 |
| 0.165208295 | 0.377149398  | 0.691111318 | 0.025431136 | 0.878100647 |
| 0.165208295 | 0.377149398  | 0.691111318 | 0.025431136 | 0.878100647 |
| 0.165393524 | -0.418524616 | 1           | 0.085309726 | 0.878100647 |
| 0.165405637 | -0.243349025 | 0.075374611 | 0.0002997   | 0.878100647 |
| 0.165405637 | -0.243349025 | 0.075374611 | 0.0002997   | 0.878100647 |
| 0.165434818 | -0.447685479 | 0.307400178 | 1           | 0.878100647 |
| 0.165434818 | -0.447685479 | 0.307400178 | 1           | 0.878100647 |
| 0.165539991 | 0.216123749  | 0.035148121 | 0.000108916 | 0.878100647 |
| 0.1658963   | -0.150121591 | 0.003169634 | 3.16E-06    | 0.878100647 |
| 0.165954023 | 0.435906466  | 1           | 0.145037597 | 0.878100647 |
| 0.165996054 | -0.220735723 | 0.03951775  | 0.000115129 | 0.878100647 |
| 0.165996054 | -0.220735723 | 0.03951775  | 0.000115129 | 0.878100647 |
| 0.166498603 | -0.459160033 | 1           | 0.416730107 | 0.878100647 |
| 0.166543215 | 0.426162236  | 0.169239932 | 1           | 0.878100647 |
| 0.166543215 | 0.426162236  | 0.169239932 | 1           | 0.878100647 |
| 0.166903621 | 0.307788804  | 0.307400178 | 0.002420613 | 0.878100647 |
| 0.167016195 | -0.461868552 | 0.439859057 | 1           | 0.878100647 |
| 0.167016195 | -0.461868552 | 0.439859057 | 1           | 0.878100647 |
| 0.167019848 | 0.462678971  | 0.439859057 | 1           | 0.878100647 |
| 0.167019848 | 0.462678971  | 0.439859057 | 1           | 0.878100647 |
| 0.167019848 | 0.462678971  | 0.439859057 | 1           | 0.878100647 |
| 0.167019848 | 0.462678971  | 0.439859057 | 1           | 0.878100647 |
| 0.167019848 | 0.462678971  | 0.439859057 | 1           | 0.878100647 |
| 0.167049611 | 0.461890954  | 1           | 0.489952655 | 0.878100647 |
| 0.167140093 | 0.218126381  | 0.000189446 | 0.025431136 | 0.878100647 |
| 0.167140093 | 0.218126381  | 0.000189446 | 0.025431136 | 0.878100647 |
| 0.167379226 | 0.432264637  | 1           | 0.145037597 | 0.878100647 |
| 0.167470704 | -0.294686785 | 0.208605117 | 0.002093839 | 0.878100647 |
| 0.167696353 | -0.231869611 | 0.043105813 | 0.000140627 | 0.878100647 |
| 0.167696353 | -0.231869611 | 0.043105813 | 0.000140627 | 0.878100647 |
| 0.1677801   | 0.462794347  | 0.584854032 | 1           | 0.878100647 |
| 0.168118946 | 0.463467471  | 0.584854032 | 0.850173656 | 0.878100647 |
| 0.168141953 | 0.1729209    | 1.56E-05    | 0.005827837 | 0.878100647 |
| 0.168465437 | -0.186856949 | 0.018163994 | 1.80E-05    | 0.878100647 |
| 0.168532131 | 0.253467323  | 0.0008771   | 0.066020955 | 0.878100647 |
| 0.168532131 | 0.253467323  | 0.0008771   | 0.066020955 | 0.878100647 |
| 0.168532131 | 0.253467323  | 0.0008771   | 0.066020955 | 0.878100647 |
| 0.168566337 | 0.430541434  | 1           | 0.145037597 | 0.878100647 |
| 0.168688258 | 0.171654402  | 1.56E-05    | 0.005827837 | 0.878100647 |
| 0.1687414   | 0.108299897  | 3.18E-07    | 0.000124759 | 0.878100647 |
| 0.169102078 | 0.198020952  | 6.77E-05    | 0.011906673 | 0.878100647 |
| 0.169119543 | -0.456206803 | 1           | 0.416730107 | 0.878100647 |
| 0.169119543 | -0.456206803 | 1           | 0.416730107 | 0.878100647 |
| 0.169235012 | -0.288537202 | 0.205025676 | 0.001791344 | 0.878100647 |
| 0.169451569 | -0.101512943 | 0.000189446 | 1.54E-07    | 0.878100647 |
| 0.169451569 | -0.101512943 | 0.000189446 | 1.54E-07    | 0.878100647 |
| 0.169719902 | 0.402106724  | 0.075374611 | 1           | 0.878100647 |
| 0.169719902 | 0.402106724  | 0.075374611 | 1           | 0.878100647 |
| 0.170392025 | -0.443942103 | 1           | 0.242167012 | 0.878100647 |
| 0.170729172 | -0.110854596 | 0.000295301 | 2.98E-07    | 0.878100647 |
| 0.17097323  | -0.369230653 | 0.584854032 | 0.025431136 | 0.878100647 |
| 0.17097323  | -0.369230653 | 0.584854032 | 0.025431136 | 0.878100647 |
| 0.171350405 | -0.054046525 | 1.23E-06    | 3.90E-09    | 0.878100647 |
| 0.171386586 | 0.442084619  | 1           | 0.242167012 | 0.878100647 |
| 0.171386586 | 0.442084619  | 1           | 0.242167012 | 0.878100647 |
| 0.171406614 | 0.35713544   | 0.584854032 | 0.017403168 | 0.878100647 |
| 0.171406614 | 0.35713544   | 0.584854032 | 0.017403168 | 0.878100647 |
| 0.171406614 | 0.35713544   | 0.584854032 | 0.017403168 | 0.878100647 |
| 0.171498436 | -0.433388461 | 1           | 0.145037597 | 0.878100647 |
| 0.171544723 | 0.142375168  | 4.58E-06    | 0.001791344 | 0.878100647 |

|             |              |             |             |             |
|-------------|--------------|-------------|-------------|-------------|
| 0.171544723 | 0.142375168  | 4.58E-06    | 0.001791344 | 0.878100647 |
| 0.171768506 | 0.415679815  | 1           | 0.085309726 | 0.878100647 |
| 0.171768506 | 0.415679815  | 1           | 0.085309726 | 0.878100647 |
| 0.171876422 | 0.35375717   | 0.026049691 | 0.489952655 | 0.878100647 |
| 0.172219316 | 0.162640706  | 1.22E-05    | 0.003736177 | 0.878100647 |
| 0.172219316 | 0.162640706  | 1.22E-05    | 0.003736177 | 0.878100647 |
| 0.172245712 | -0.138626969 | 0.001207877 | 3.06E-06    | 0.878100647 |
| 0.172245712 | -0.138626969 | 0.001207877 | 3.06E-06    | 0.878100647 |
| 0.172279027 | 0.127663446  | 1.23E-06    | 0.000596242 | 0.878100647 |
| 0.172291794 | 0.454595651  | 1           | 0.416730107 | 0.878100647 |
| 0.172337254 | -0.20958587  | 0.034012327 | 7.48E-05    | 0.878100647 |
| 0.172337254 | -0.20958587  | 0.034012327 | 7.48E-05    | 0.878100647 |
| 0.172550655 | -0.130295962 | 0.0008771   | 8.55E-07    | 0.878100647 |
| 0.172828753 | -0.125232964 | 0.0008771   | 8.55E-07    | 0.878100647 |
| 0.173053272 | -0.453762136 | 1           | 0.416730107 | 0.878100647 |
| 0.173160852 | 0.318237749  | 0.412603306 | 0.005827837 | 0.878100647 |
| 0.173567273 | 0.192042139  | 0.024201521 | 4.69E-05    | 0.878100647 |
| 0.173567273 | 0.192042139  | 0.024201521 | 4.69E-05    | 0.878100647 |
| 0.173567273 | 0.192042139  | 0.024201521 | 4.69E-05    | 0.878100647 |
| 0.173567273 | 0.192042139  | 0.024201521 | 4.69E-05    | 0.878100647 |
| 0.173567273 | 0.192042139  | 0.024201521 | 4.69E-05    | 0.878100647 |
| 0.173567273 | 0.192042139  | 0.024201521 | 4.69E-05    | 0.878100647 |
| 0.173567273 | 0.192042139  | 0.024201521 | 4.69E-05    | 0.878100647 |
| 0.17376799  | -0.20044944  | 0.030989574 | 4.69E-05    | 0.878100647 |
| 0.173798051 | 0.429095061  | 1           | 0.145037597 | 0.878100647 |
| 0.173855701 | -0.209806099 | 0.034012327 | 7.48E-05    | 0.878100647 |
| 0.174072316 | -0.102995143 | 0.000245628 | 2.98E-07    | 0.878100647 |
| 0.174246171 | -0.321715171 | 0.412603306 | 0.006372161 | 0.878100647 |
| 0.174246171 | -0.321715171 | 0.412603306 | 0.006372161 | 0.878100647 |
| 0.174311944 | -0.457317416 | 0.881481882 | 0.645935818 | 0.878100647 |
| 0.174311944 | -0.457317416 | 0.881481882 | 0.645935818 | 0.878100647 |
| 0.174474478 | -0.457380783 | 0.737584497 | 0.704162183 | 0.878100647 |
| 0.174567897 | -0.444081739 | 1           | 0.242167012 | 0.878100647 |
| 0.174648746 | 0.32397689   | 0.010835964 | 0.364167203 | 0.878100647 |
| 0.175037274 | 0.448547143  | 0.439859057 | 1           | 0.878100647 |
| 0.175037274 | 0.448547143  | 0.439859057 | 1           | 0.878100647 |
| 0.175690497 | 0.290139482  | 0.205025676 | 0.002093839 | 0.878100647 |
| 0.175997407 | -0.159185216 | 0.007135475 | 9.47E-06    | 0.878100647 |
| 0.176022561 | -0.434086877 | 0.307400178 | 1           | 0.878100647 |
| 0.176039015 | 0.375793193  | 0.737584497 | 0.031639242 | 0.878100647 |
| 0.17609871  | 0.339071207  | 0.439859057 | 0.009270366 | 0.878100647 |
| 0.176268756 | -0.450856431 | 0.439859057 | 1           | 0.878100647 |
| 0.176514495 | -0.453604838 | 1           | 0.489952655 | 0.878100647 |
| 0.17657033  | 0.398158636  | 1           | 0.060775899 | 0.878100647 |
| 0.177009421 | -0.351908555 | 0.584854032 | 0.02341474  | 0.878100647 |
| 0.177009421 | -0.351908555 | 0.584854032 | 0.02341474  | 0.878100647 |
| 0.177109319 | -0.306828051 | 0.34036444  | 0.003736177 | 0.878100647 |
| 0.177344999 | -0.451352126 | 1           | 0.489952655 | 0.878100647 |
| 0.177371486 | -0.453073637 | 0.989933981 | 0.489952655 | 0.878100647 |
| 0.177574102 | -0.130360414 | 0.0008771   | 8.55E-07    | 0.878100647 |
| 0.177574102 | -0.130360414 | 0.0008771   | 8.55E-07    | 0.878100647 |
| 0.177671197 | 0.436134904  | 0.307400178 | 1           | 0.878100647 |
| 0.1785023   | 0.315024564  | 0.009746439 | 0.272770942 | 0.878100647 |
| 0.178508863 | -0.453261827 | 0.584854032 | 0.850173656 | 0.878100647 |
| 0.178516017 | 0.066405404  | 7.89E-09    | 3.66E-06    | 0.878100647 |
| 0.178516017 | 0.066405404  | 7.89E-09    | 3.66E-06    | 0.878100647 |
| 0.178516017 | 0.066405404  | 7.89E-09    | 3.66E-06    | 0.878100647 |
| 0.178516017 | 0.066405404  | 7.89E-09    | 3.66E-06    | 0.878100647 |
| 0.178516017 | 0.066405404  | 7.89E-09    | 3.66E-06    | 0.878100647 |
| 0.178516017 | 0.066405404  | 7.89E-09    | 3.66E-06    | 0.878100647 |
| 0.178646702 | -0.238568023 | 0.075374611 | 0.0002997   | 0.878100647 |
| 0.178646702 | -0.238568023 | 0.075374611 | 0.0002997   | 0.878100647 |
| 0.178908095 | -0.098830467 | 0.000189446 | 1.54E-07    | 0.878100647 |
| 0.178924273 | -0.444190523 | 1           | 0.397942841 | 0.878100647 |
| 0.179101976 | -0.326689037 | 0.439859057 | 0.006372161 | 0.878100647 |

|             |              |             |             |             |
|-------------|--------------|-------------|-------------|-------------|
| 0.179101976 | -0.326689037 | 0.439859057 | 0.006372161 | 0.878100647 |
| 0.179769557 | -0.249361153 | 0.095538718 | 0.000596242 | 0.878100647 |
| 0.17983301  | 0.433634279  | 0.307400178 | 1           | 0.878100647 |
| 0.179992471 | -0.320245793 | 0.412603306 | 0.006372161 | 0.878100647 |
| 0.179992471 | -0.320245793 | 0.412603306 | 0.006372161 | 0.878100647 |
| 0.180137509 | -0.304144411 | 0.307400178 | 0.003736177 | 0.878100647 |
| 0.180231941 | 0.445748261  | 1           | 0.416730107 | 0.878100647 |
| 0.180231941 | 0.445748261  | 1           | 0.416730107 | 0.878100647 |
| 0.18042142  | -0.164911007 | 0.008580492 | 9.47E-06    | 0.878100647 |
| 0.180674417 | -0.205047371 | 0.034012327 | 7.48E-05    | 0.878100647 |
| 0.180783209 | 0.311605673  | 0.412603306 | 0.005827837 | 0.878100647 |
| 0.180783209 | 0.311605673  | 0.412603306 | 0.005827837 | 0.878100647 |
| 0.180801445 | -0.44972491  | 0.989933981 | 0.489952655 | 0.878100647 |
| 0.180810012 | -0.425994202 | 0.273258425 | 1           | 0.878100647 |
| 0.181143933 | 0.300566113  | 0.307400178 | 0.003736177 | 0.878100647 |
| 0.181164643 | 0.282292849  | 0.003169634 | 0.145037597 | 0.878100647 |
| 0.181269859 | -0.328445976 | 0.439859057 | 0.009270366 | 0.878100647 |
| 0.181269859 | -0.328445976 | 0.439859057 | 0.009270366 | 0.878100647 |
| 0.181269859 | -0.328445976 | 0.439859057 | 0.009270366 | 0.878100647 |
| 0.18172276  | 0.302425065  | 0.307400178 | 0.003736177 | 0.878100647 |
| 0.182156225 | 0.210788427  | 0.000228282 | 0.025431136 | 0.878100647 |
| 0.18222284  | 0.353193285  | 0.584854032 | 0.02341474  | 0.878100647 |
| 0.182474154 | 0.431687455  | 1           | 0.242167012 | 0.878100647 |
| 0.182474154 | 0.431687455  | 1           | 0.242167012 | 0.878100647 |
| 0.182474154 | 0.431687455  | 1           | 0.242167012 | 0.878100647 |
| 0.182852357 | -0.417103897 | 1           | 0.145037597 | 0.878100647 |
| 0.183128559 | 0.434615566  | 1           | 0.242167012 | 0.878100647 |
| 0.183128559 | 0.434615566  | 1           | 0.242167012 | 0.878100647 |
| 0.183416738 | 0.446571426  | 0.584854032 | 1           | 0.878100647 |
| 0.183523299 | -0.448208004 | 0.584854032 | 0.850173656 | 0.878100647 |
| 0.183802505 | 0.428984733  | 1           | 0.242167012 | 0.878100647 |
| 0.183946264 | 0.299081084  | 0.307400178 | 0.003736177 | 0.878100647 |
| 0.1840634   | 0.307161219  | 0.00974133  | 0.242167012 | 0.878100647 |
| 0.1844145   | -0.445888026 | 1           | 0.489952655 | 0.878100647 |
| 0.184642825 | -0.447318736 | 0.737584497 | 0.704162183 | 0.878100647 |
| 0.184642825 | -0.447318736 | 0.737584497 | 0.704162183 | 0.878100647 |
| 0.184649279 | 0.233135717  | 0.075374611 | 0.0002997   | 0.878100647 |
| 0.184649279 | 0.233135717  | 0.075374611 | 0.0002997   | 0.878100647 |
| 0.1847319   | -0.186610433 | 0.018394332 | 4.69E-05    | 0.878100647 |
| 0.185027348 | -0.443412915 | 1           | 0.489952655 | 0.878100647 |
| 0.18506653  | 0.359749151  | 0.584854032 | 0.025431136 | 0.878100647 |
| 0.18506653  | 0.359749151  | 0.584854032 | 0.025431136 | 0.878100647 |
| 0.18506653  | 0.359749151  | 0.584854032 | 0.025431136 | 0.878100647 |
| 0.185194126 | 0.430793886  | 1           | 0.242167012 | 0.878100647 |
| 0.185822295 | 0.414085341  | 0.19926681  | 1           | 0.878100647 |
| 0.18613263  | 0.276303539  | 0.19926681  | 0.001791344 | 0.878100647 |
| 0.186620586 | -0.402023608 | 1           | 0.102782106 | 0.878100647 |
| 0.186620586 | -0.402023608 | 1           | 0.102782106 | 0.878100647 |
| 0.186730164 | 0.427371248  | 0.307400178 | 1           | 0.878100647 |
| 0.187009345 | 0.401129738  | 0.134257478 | 1           | 0.878100647 |
| 0.187009345 | 0.401129738  | 0.134257478 | 1           | 0.878100647 |
| 0.187546727 | -0.431744194 | 0.412603306 | 1           | 0.878100647 |
| 0.187713094 | 0.301956933  | 0.008580492 | 0.242167012 | 0.878100647 |
| 0.188142499 | -0.1584617   | 0.008580492 | 9.47E-06    | 0.878100647 |
| 0.18843233  | 0.283399501  | 0.205025676 | 0.002420613 | 0.878100647 |
| 0.188467751 | 0.425396508  | 0.307400178 | 1           | 0.878100647 |
| 0.188834099 | -0.291150414 | 0.307400178 | 0.003736177 | 0.878100647 |
| 0.188885556 | -0.436992802 | 1           | 0.416730107 | 0.878100647 |
| 0.189184347 | -0.432574746 | 1           | 0.364167203 | 0.878100647 |
| 0.189184347 | -0.432574746 | 1           | 0.364167203 | 0.878100647 |
| 0.189208906 | 0.437149347  | 1           | 0.416730107 | 0.878100647 |
| 0.189208906 | 0.437149347  | 1           | 0.416730107 | 0.878100647 |
| 0.189305198 | 0.440508598  | 0.584854032 | 1           | 0.878100647 |
| 0.189410344 | -0.337597913 | 0.439859057 | 0.017403168 | 0.878100647 |

|             |              |             |             |             |
|-------------|--------------|-------------|-------------|-------------|
| 0.189686258 | -0.42195175  | 1           | 0.242167012 | 0.878100647 |
| 0.189686258 | -0.42195175  | 1           | 0.242167012 | 0.878100647 |
| 0.189686258 | -0.42195175  | 1           | 0.242167012 | 0.878100647 |
| 0.189999109 | -0.30599236  | 0.009746439 | 0.242167012 | 0.878100647 |
| 0.189999109 | -0.30599236  | 0.009746439 | 0.242167012 | 0.878100647 |
| 0.190031112 | 0.20283628   | 0.000189446 | 0.02341474  | 0.878100647 |
| 0.190268038 | -0.248041345 | 0.095538718 | 0.000596242 | 0.878100647 |
| 0.190268038 | -0.248041345 | 0.095538718 | 0.000596242 | 0.878100647 |
| 0.190468537 | 0.410551053  | 0.205025676 | 1           | 0.878100647 |
| 0.190468537 | 0.410551053  | 0.205025676 | 1           | 0.878100647 |
| 0.190468537 | 0.410551053  | 0.205025676 | 1           | 0.878100647 |
| 0.190628048 | 0.148509741  | 0.004273917 | 4.11E-06    | 0.878100647 |
| 0.190628048 | 0.148509741  | 0.004273917 | 4.11E-06    | 0.878100647 |
| 0.190688262 | 0.048147327  | 1.75E-09    | 2.98E-07    | 0.878100647 |
| 0.190693406 | 0.42806406   | 1           | 0.272770942 | 0.878100647 |
| 0.190709876 | 0.384680223  | 1           | 0.061934943 | 0.878100647 |
| 0.190757605 | -0.423765329 | 1           | 0.242167012 | 0.878100647 |
| 0.190892223 | -0.44119404  | 0.737584497 | 0.704162183 | 0.878100647 |
| 0.191183794 | -0.426320603 | 1           | 0.242167012 | 0.878100647 |
| 0.191183794 | -0.426320603 | 1           | 0.242167012 | 0.878100647 |
| 0.192001309 | 0.109698437  | 1.09E-06    | 0.00028972  | 0.878100647 |
| 0.192005828 | 0.13262842   | 4.58E-06    | 0.001090387 | 0.878100647 |
| 0.192234303 | 0.372246586  | 0.881481882 | 0.052574033 | 0.878100647 |
| 0.192248197 | 0.437724004  | 1           | 0.489952655 | 0.878100647 |
| 0.192248197 | 0.437724004  | 1           | 0.489952655 | 0.878100647 |
| 0.192249137 | -0.187297225 | 0.025193624 | 4.69E-05    | 0.878100647 |
| 0.192249137 | -0.187297225 | 0.025193624 | 4.69E-05    | 0.878100647 |
| 0.192249137 | -0.187297225 | 0.025193624 | 4.69E-05    | 0.878100647 |
| 0.192249137 | -0.187297225 | 0.025193624 | 4.69E-05    | 0.878100647 |
| 0.192614019 | 0.388891456  | 0.095538718 | 1           | 0.878100647 |
| 0.192924137 | 0.329561747  | 0.439859057 | 0.011906673 | 0.878100647 |
| 0.192998916 | 0.347599319  | 0.584854032 | 0.025431136 | 0.878100647 |
| 0.193103838 | 0.067305944  | 2.61E-08    | 4.11E-06    | 0.878100647 |
| 0.193103838 | 0.067305944  | 2.61E-08    | 4.11E-06    | 0.878100647 |
| 0.193235031 | 0.279570635  | 0.004273917 | 0.145037597 | 0.878100647 |
| 0.193262041 | -0.427223345 | 1           | 0.364167203 | 0.878100647 |
| 0.193262041 | -0.427223345 | 1           | 0.364167203 | 0.878100647 |
| 0.193449094 | 0.434262014  | 1           | 0.489952655 | 0.878100647 |
| 0.193502514 | 0.185464373  | 6.77E-05    | 0.011906673 | 0.878100647 |
| 0.193502514 | 0.185464373  | 6.77E-05    | 0.011906673 | 0.878100647 |
| 0.193572977 | -0.414051525 | 1           | 0.164911511 | 0.878100647 |
| 0.193572977 | -0.414051525 | 1           | 0.164911511 | 0.878100647 |
| 0.193572977 | -0.414051525 | 1           | 0.164911511 | 0.878100647 |
| 0.193704166 | -0.413837159 | 0.295435331 | 1           | 0.878100647 |
| 0.193916199 | 0.420630023  | 0.34036444  | 1           | 0.878100647 |
| 0.194230414 | 0.426359935  | 0.412603306 | 1           | 0.878100647 |
| 0.194230414 | 0.426359935  | 0.412603306 | 1           | 0.878100647 |
| 0.194234434 | 0.40967907   | 1           | 0.145037597 | 0.878100647 |
| 0.194234434 | 0.40967907   | 1           | 0.145037597 | 0.878100647 |
| 0.194259002 | 0.252201765  | 0.104319013 | 0.000997588 | 0.878100647 |
| 0.194292133 | 0.191552042  | 8.53E-05    | 0.017403168 | 0.878100647 |
| 0.194743341 | 0.352181607  | 0.03951775  | 0.645935818 | 0.878100647 |
| 0.194743341 | 0.352181607  | 0.03951775  | 0.645935818 | 0.878100647 |
| 0.194744319 | 0.417479409  | 1           | 0.242167012 | 0.878100647 |
| 0.19485988  | 0.401381014  | 1           | 0.129712192 | 0.878100647 |
| 0.194989289 | -0.02405564  | 7.89E-09    | 1.09E-10    | 0.878100647 |
| 0.194989289 | -0.02405564  | 7.89E-09    | 1.09E-10    | 0.878100647 |
| 0.194989289 | -0.02405564  | 7.89E-09    | 1.09E-10    | 0.878100647 |
| 0.195086915 | 0.21632926   | 0.000295301 | 0.031639242 | 0.878100647 |
| 0.195096641 | -0.371617947 | 0.075374611 | 0.850173656 | 0.878100647 |
| 0.195115911 | 0.145332649  | 1.22E-05    | 0.002093839 | 0.878100647 |
| 0.195196703 | 0.362970705  | 0.043105813 | 0.704162183 | 0.878100647 |
| 0.195258324 | 0.313244279  | 0.016023223 | 0.364167203 | 0.878100647 |
| 0.195686549 | 0.300935951  | 0.412603306 | 0.005827837 | 0.878100647 |



|             |              |             |             |             |
|-------------|--------------|-------------|-------------|-------------|
| 0.195822724 | 0.121137597  | 1.84E-06    | 0.000596242 | 0.878100647 |
| 0.19596098  | 0.416528992  | 0.307400178 | 1           | 0.878100647 |
| 0.196013776 | -0.427375646 | 1           | 0.397942841 | 0.878100647 |
| 0.196013776 | -0.427375646 | 1           | 0.397942841 | 0.878100647 |
| 0.196013776 | -0.427375646 | 1           | 0.397942841 | 0.878100647 |
| 0.196013776 | -0.427375646 | 1           | 0.397942841 | 0.878100647 |
| 0.196072715 | -0.137399254 | 0.001611045 | 3.16E-06    | 0.878100647 |
| 0.196072715 | -0.137399254 | 0.001611045 | 3.16E-06    | 0.878100647 |
| 0.196165014 | 0.405973318  | 0.205025676 | 1           | 0.878100647 |
| 0.196165014 | 0.405973318  | 0.205025676 | 1           | 0.878100647 |
| 0.196238878 | -0.431532289 | 1           | 0.489952655 | 0.878100647 |
| 0.196238878 | -0.431532289 | 1           | 0.489952655 | 0.878100647 |
| 0.19628914  | -0.276216691 | 0.205025676 | 0.002420613 | 0.878100647 |
| 0.196302468 | 0.405090312  | 1           | 0.145037597 | 0.878100647 |
| 0.196302468 | 0.405090312  | 1           | 0.145037597 | 0.878100647 |
| 0.196302596 | 0.278765389  | 0.205025676 | 0.002420613 | 0.878100647 |
| 0.196690159 | -0.426070848 | 1           | 0.397942841 | 0.878100647 |
| 0.196862939 | -0.340800998 | 0.584854032 | 0.02341474  | 0.878100647 |
| 0.197081333 | 0.43280478   | 0.584854032 | 1           | 0.878100647 |
| 0.197143104 | 0.245390629  | 0.0008771   | 0.085309726 | 0.878100647 |
| 0.197912509 | -0.421662897 | 1           | 0.305102445 | 0.878100647 |
| 0.197912509 | -0.421662897 | 1           | 0.305102445 | 0.878100647 |
| 0.198785617 | 0.421999305  | 0.412603306 | 1           | 0.878100647 |
| 0.198982316 | 0.432978875  | 0.88322726  | 0.704162183 | 0.878100647 |
| 0.199067071 | -0.389126872 | 1           | 0.10273905  | 0.878100647 |
| 0.19949157  | 0.432754436  | 0.881481882 | 0.704162183 | 0.878100647 |
| 0.199801073 | 0.145149533  | 1.22E-05    | 0.002093839 | 0.878100647 |
| 0.199867505 | 0.16861171   | 0.010835964 | 1.80E-05    | 0.878100647 |
| 0.200093019 | 0.204420457  | 0.000249829 | 0.025431136 | 0.878100647 |
| 0.200106396 | -0.317951217 | 0.439859057 | 0.009270366 | 0.878100647 |
| 0.200106396 | -0.317951217 | 0.439859057 | 0.009270366 | 0.878100647 |
| 0.200285962 | -0.425804542 | 1           | 0.416730107 | 0.878100647 |
| 0.200589439 | -0.376150396 | 1           | 0.061934943 | 0.878100647 |
| 0.201217686 | 0.315821579  | 0.439859057 | 0.009270366 | 0.878100647 |
| 0.201217686 | 0.315821579  | 0.439859057 | 0.009270366 | 0.878100647 |
| 0.201801745 | 0.430703747  | 0.881481882 | 0.704162183 | 0.878100647 |
| 0.201899607 | 0.430496685  | 0.881481882 | 0.704162183 | 0.878100647 |
| 0.202269496 | 0.398020612  | 1           | 0.145037597 | 0.878100647 |
| 0.202401209 | 0.190401122  | 0.000155445 | 0.017403168 | 0.878100647 |
| 0.202450301 | -0.40301501  | 0.205025676 | 1           | 0.878100647 |
| 0.202450301 | -0.40301501  | 0.205025676 | 1           | 0.878100647 |
| 0.202450301 | -0.40301501  | 0.205025676 | 1           | 0.878100647 |
| 0.202450301 | -0.40301501  | 0.205025676 | 1           | 0.878100647 |
| 0.202518402 | 0.217204302  | 0.000467492 | 0.041232736 | 0.878100647 |
| 0.202687199 | 0.393464599  | 1           | 0.126792252 | 0.878100647 |
| 0.202687199 | 0.393464599  | 1           | 0.126792252 | 0.878100647 |
| 0.202687199 | 0.393464599  | 1           | 0.126792252 | 0.878100647 |
| 0.202820613 | -0.429583296 | 0.881481882 | 0.704162183 | 0.878100647 |
| 0.203346642 | 0.419645858  | 0.439859057 | 1           | 0.878100647 |
| 0.203346642 | 0.419645858  | 0.439859057 | 1           | 0.878100647 |
| 0.203487011 | 0.158167283  | 6.19E-05    | 0.004171959 | 0.878100647 |
| 0.203503979 | 0.063259071  | 2.61E-08    | 3.66E-06    | 0.878100647 |
| 0.204356436 | -0.415691972 | 1           | 0.364167203 | 0.878100647 |
| 0.204404476 | -0.424363746 | 1           | 0.489952655 | 0.878100647 |
| 0.204416645 | 0.227732237  | 0.0008771   | 0.053084396 | 0.878100647 |
| 0.204586098 | -0.180957121 | 0.018394332 | 4.69E-05    | 0.878100647 |
| 0.204586098 | -0.180957121 | 0.018394332 | 4.69E-05    | 0.878100647 |
| 0.204586098 | -0.180957121 | 0.018394332 | 4.69E-05    | 0.878100647 |
| 0.204586098 | -0.180957121 | 0.018394332 | 4.69E-05    | 0.878100647 |
| 0.204586098 | -0.180957121 | 0.018394332 | 4.69E-05    | 0.878100647 |
| 0.204586098 | -0.180957121 | 0.018394332 | 4.69E-05    | 0.878100647 |
| 0.205044623 | 0.293893794  | 0.349433107 | 0.005827837 | 0.878100647 |
| 0.205044623 | 0.293893794  | 0.349433107 | 0.005827837 | 0.878100647 |
| 0.205044623 | 0.293893794  | 0.349433107 | 0.005827837 | 0.878100647 |

|             |              |             |             |             |
|-------------|--------------|-------------|-------------|-------------|
| 0.205859286 | 0.045865978  | 1.75E-09    | 2.98E-07    | 0.878100647 |
| 0.205859286 | 0.045865978  | 1.75E-09    | 2.98E-07    | 0.878100647 |
| 0.205866553 | 0.420564353  | 1           | 0.416730107 | 0.878100647 |
| 0.206018326 | -0.395424245 | 1           | 0.145037597 | 0.878100647 |
| 0.206018326 | -0.395424245 | 1           | 0.145037597 | 0.878100647 |
| 0.206129552 | -0.247538564 | 0.104319013 | 0.001090387 | 0.878100647 |
| 0.206140147 | -0.243933255 | 0.095538718 | 0.000997588 | 0.878100647 |
| 0.206192055 | 0.399438649  | 0.205025676 | 1           | 0.878100647 |
| 0.206246933 | -0.414957402 | 1           | 0.364167203 | 0.878100647 |
| 0.206246933 | -0.414957402 | 1           | 0.364167203 | 0.878100647 |
| 0.206630939 | 0.395684633  | 1           | 0.145037597 | 0.878100647 |
| 0.20664414  | -0.328120524 | 0.439859057 | 0.02341474  | 0.878100647 |
| 0.20664414  | -0.328120524 | 0.439859057 | 0.02341474  | 0.878100647 |
| 0.206967864 | -0.206979076 | 0.043105813 | 0.000163543 | 0.878100647 |
| 0.206967864 | -0.206979076 | 0.043105813 | 0.000163543 | 0.878100647 |
| 0.206967864 | -0.206979076 | 0.043105813 | 0.000163543 | 0.878100647 |
| 0.206967864 | -0.206979076 | 0.043105813 | 0.000163543 | 0.878100647 |
| 0.207043088 | 0.23270245   | 0.0008771   | 0.060775899 | 0.878100647 |
| 0.207043088 | 0.23270245   | 0.0008771   | 0.060775899 | 0.878100647 |
| 0.207372326 | -0.425669079 | 0.881481882 | 0.704162183 | 0.878100647 |
| 0.207586622 | 0.326481118  | 0.439859057 | 0.02341474  | 0.878100647 |
| 0.207638728 | 0.394821007  | 0.205025676 | 1           | 0.878100647 |
| 0.207638728 | 0.394821007  | 0.205025676 | 1           | 0.878100647 |
| 0.207718936 | -0.376268396 | 1           | 0.085309726 | 0.878100647 |
| 0.207718936 | -0.376268396 | 1           | 0.085309726 | 0.878100647 |
| 0.20811335  | -0.334081423 | 0.034012327 | 0.489952655 | 0.878100647 |
| 0.20811335  | -0.334081423 | 0.034012327 | 0.489952655 | 0.878100647 |
| 0.208423233 | 0.367555079  | 0.989933981 | 0.061934943 | 0.878100647 |
| 0.208489938 | 0.291289263  | 0.010835964 | 0.242167012 | 0.878100647 |
| 0.208583206 | 0.424545069  | 0.881481882 | 0.704162183 | 0.878100647 |
| 0.208601382 | -0.417217129 | 1           | 0.416730107 | 0.878100647 |
| 0.208601382 | -0.417217129 | 1           | 0.416730107 | 0.878100647 |
| 0.208640644 | -0.282831737 | 0.307400178 | 0.003736177 | 0.878100647 |
| 0.20878876  | 0.11429449   | 1.23E-06    | 0.000324671 | 0.878100647 |
| 0.208853746 | 0.394220058  | 0.205025676 | 1           | 0.878100647 |
| 0.209158881 | 0.240791771  | 0.095538718 | 0.000997588 | 0.878100647 |
| 0.209261458 | -0.419041627 | 1           | 0.489952655 | 0.878100647 |
| 0.209533755 | -0.420648898 | 1           | 0.489952655 | 0.878100647 |
| 0.210032778 | 0.301602292  | 0.412603306 | 0.009270366 | 0.878100647 |
| 0.210032778 | 0.301602292  | 0.412603306 | 0.009270366 | 0.878100647 |
| 0.210172428 | -0.222691536 | 0.073031096 | 0.000324671 | 0.878100647 |
| 0.210172428 | -0.222691536 | 0.073031096 | 0.000324671 | 0.878100647 |
| 0.210731382 | 0.345781801  | 0.584854032 | 0.031639242 | 0.878100647 |
| 0.210731382 | 0.345781801  | 0.584854032 | 0.031639242 | 0.878100647 |
| 0.210731382 | 0.345781801  | 0.584854032 | 0.031639242 | 0.878100647 |
| 0.210731382 | 0.345781801  | 0.584854032 | 0.031639242 | 0.878100647 |
| 0.210731382 | 0.345781801  | 0.584854032 | 0.031639242 | 0.878100647 |
| 0.210731382 | 0.345781801  | 0.584854032 | 0.031639242 | 0.878100647 |
| 0.210731382 | 0.345781801  | 0.584854032 | 0.031639242 | 0.878100647 |
| 0.210731382 | 0.345781801  | 0.584854032 | 0.031639242 | 0.878100647 |
| 0.210731382 | 0.345781801  | 0.584854032 | 0.031639242 | 0.878100647 |
| 0.211023623 | 0.422542663  | 0.737584497 | 0.850173656 | 0.878100647 |
| 0.211470277 | -0.387191619 | 1           | 0.145037597 | 0.878100647 |
| 0.211911137 | -0.404072613 | 1           | 0.242167012 | 0.878100647 |
| 0.211911137 | -0.404072613 | 1           | 0.242167012 | 0.878100647 |
| 0.212006851 | -0.315050362 | 0.439859057 | 0.011906673 | 0.878100647 |
| 0.212631754 | -0.213466662 | 0.043105813 | 0.0002997   | 0.878100647 |
| 0.212631754 | -0.213466662 | 0.043105813 | 0.0002997   | 0.878100647 |
| 0.212698229 | 0.244356322  | 0.104319013 | 0.001090387 | 0.878100647 |
| 0.213017647 | -0.196471836 | 0.034012327 | 0.000124759 | 0.878100647 |
| 0.213342405 | 0.359100304  | 0.881481882 | 0.060775899 | 0.878100647 |
| 0.213342733 | -0.390504052 | 1           | 0.145037597 | 0.878100647 |
| 0.213342733 | -0.390504052 | 1           | 0.145037597 | 0.878100647 |
| 0.214043237 | -0.127740658 | 0.001207877 | 3.06E-06    | 0.878100647 |

|             |              |             |             |             |
|-------------|--------------|-------------|-------------|-------------|
| 0.214043237 | -0.127740658 | 0.001207877 | 3.06E-06    | 0.878100647 |
| 0.214043237 | -0.127740658 | 0.001207877 | 3.06E-06    | 0.878100647 |
| 0.214043237 | -0.127740658 | 0.001207877 | 3.06E-06    | 0.878100647 |
| 0.214210761 | 0.403810249  | 1           | 0.242167012 | 0.878100647 |
| 0.214390457 | -0.276231715 | 0.295435331 | 0.003736177 | 0.878100647 |
| 0.214857427 | -0.4191009   | 0.783270054 | 0.704162183 | 0.878100647 |
| 0.214857427 | -0.4191009   | 0.783270054 | 0.704162183 | 0.878100647 |
| 0.214867712 | -0.066526487 | 1.22E-05    | 1.63E-08    | 0.878100647 |
| 0.214969083 | -0.124978676 | 0.001207877 | 3.06E-06    | 0.878100647 |
| 0.214996085 | 0.054708586  | 7.89E-09    | 8.55E-07    | 0.878100647 |
| 0.215315279 | 0.409695311  | 0.439859057 | 1           | 0.878100647 |
| 0.215373148 | -0.391283578 | 1           | 0.164911511 | 0.878100647 |
| 0.215579402 | 0.415304963  | 0.584854032 | 1           | 0.878100647 |
| 0.215579402 | 0.415304963  | 0.584854032 | 1           | 0.878100647 |
| 0.215668803 | 0.225727289  | 0.0008771   | 0.060775899 | 0.878100647 |
| 0.215668803 | 0.225727289  | 0.0008771   | 0.060775899 | 0.878100647 |
| 0.216272345 | 0.349835598  | 0.737584497 | 0.052574033 | 0.878100647 |
| 0.216272345 | 0.349835598  | 0.737584497 | 0.052574033 | 0.878100647 |
| 0.216272345 | 0.349835598  | 0.737584497 | 0.052574033 | 0.878100647 |
| 0.216342394 | 0.417808962  | 0.737584497 | 0.704162183 | 0.878100647 |
| 0.216342394 | 0.417808962  | 0.737584497 | 0.704162183 | 0.878100647 |
| 0.216561388 | -0.412260539 | 0.439859057 | 1           | 0.878100647 |
| 0.216764873 | -0.417234311 | 0.881481882 | 0.704162183 | 0.878100647 |
| 0.216769342 | -0.412591736 | 1           | 0.489952655 | 0.878100647 |
| 0.21685745  | -0.381199551 | 1           | 0.145037597 | 0.878100647 |
| 0.217331402 | -0.32201727  | 0.034012327 | 0.489952655 | 0.878100647 |
| 0.217331402 | -0.32201727  | 0.034012327 | 0.489952655 | 0.878100647 |
| 0.217377821 | 0.416173564  | 0.989933981 | 0.704162183 | 0.878100647 |
| 0.217742979 | -0.407673752 | 1           | 0.397942841 | 0.878100647 |
| 0.218076067 | 0.399838187  | 1           | 0.242167012 | 0.878100647 |
| 0.218076067 | 0.399838187  | 1           | 0.242167012 | 0.878100647 |
| 0.218109954 | 0.333777103  | 0.584854032 | 0.029310175 | 0.878100647 |
| 0.218118584 | 0.165880912  | 6.77E-05    | 0.006372161 | 0.878100647 |
| 0.218118584 | 0.165880912  | 6.77E-05    | 0.006372161 | 0.878100647 |
| 0.218245397 | 0.395395993  | 0.307400178 | 1           | 0.878100647 |
| 0.218245397 | 0.395395993  | 0.307400178 | 1           | 0.878100647 |
| 0.21835685  | 0.396279914  | 0.307400178 | 1           | 0.878100647 |
| 0.218439281 | 0.343391529  | 0.043105813 | 0.704162183 | 0.878100647 |
| 0.218439281 | 0.343391529  | 0.043105813 | 0.704162183 | 0.878100647 |
| 0.218439281 | 0.343391529  | 0.043105813 | 0.704162183 | 0.878100647 |
| 0.218439281 | 0.343391529  | 0.043105813 | 0.704162183 | 0.878100647 |
| 0.218480063 | -0.260616021 | 0.19926681  | 0.002420613 | 0.878100647 |
| 0.218651296 | -0.181659158 | 0.025193624 | 7.48E-05    | 0.878100647 |
| 0.218699771 | 0.410347438  | 1           | 0.489952655 | 0.878100647 |
| 0.218699771 | 0.410347438  | 1           | 0.489952655 | 0.878100647 |
| 0.218977447 | 0.410139684  | 0.439859057 | 1           | 0.878100647 |
| 0.219121872 | 0.344302945  | 0.058883576 | 0.704162183 | 0.878100647 |
| 0.219130779 | 0.140950375  | 1.22E-05    | 0.002093839 | 0.878100647 |
| 0.219287066 | -0.408158452 | 1           | 0.416730107 | 0.878100647 |
| 0.219331641 | 0.392901649  | 1           | 0.242167012 | 0.878100647 |
| 0.21968206  | -0.159708886 | 0.009746439 | 1.80E-05    | 0.878100647 |
| 0.21968206  | -0.159708886 | 0.009746439 | 1.80E-05    | 0.878100647 |
| 0.219930674 | -0.390930568 | 1           | 0.242167012 | 0.878100647 |
| 0.219965339 | 0.339340334  | 0.584854032 | 0.040084197 | 0.878100647 |
| 0.220650888 | 0.384358546  | 0.205025676 | 1           | 0.878100647 |
| 0.220709684 | -0.152105274 | 0.008580492 | 1.29E-05    | 0.878100647 |
| 0.220709684 | -0.152105274 | 0.008580492 | 1.29E-05    | 0.878100647 |
| 0.220741795 | 0.401043929  | 0.412603306 | 1           | 0.878100647 |
| 0.22076985  | 0.063224909  | 2.61E-08    | 4.11E-06    | 0.878100647 |
| 0.221206233 | 0.244762042  | 0.001611045 | 0.10273905  | 0.878100647 |
| 0.221293935 | 0.255092697  | 0.192696374 | 0.002093839 | 0.878100647 |
| 0.221339692 | 0.344114686  | 0.737584497 | 0.052574033 | 0.878100647 |
| 0.221466155 | -0.375827783 | 1           | 0.126792252 | 0.878100647 |
| 0.221466155 | -0.375827783 | 1           | 0.126792252 | 0.878100647 |

|             |              |             |             |             |
|-------------|--------------|-------------|-------------|-------------|
| 0.221492138 | -0.400312929 | 1           | 0.364167203 | 0.878100647 |
| 0.22172575  | -0.310177302 | 0.439859057 | 0.017403168 | 0.878100647 |
| 0.221856581 | 0.363696794  | 1           | 0.085309726 | 0.878100647 |
| 0.221973104 | -0.410318339 | 0.584854032 | 1           | 0.878100647 |
| 0.221996793 | 0.182820151  | 0.000155445 | 0.017403168 | 0.878100647 |
| 0.221996793 | 0.182820151  | 0.000155445 | 0.017403168 | 0.878100647 |
| 0.221996793 | 0.182820151  | 0.000155445 | 0.017403168 | 0.878100647 |
| 0.221996793 | 0.182820151  | 0.000155445 | 0.017403168 | 0.878100647 |
| 0.222257197 | 0.347983182  | 0.737584497 | 0.053084396 | 0.878100647 |
| 0.222257197 | 0.347983182  | 0.737584497 | 0.053084396 | 0.878100647 |
| 0.222257197 | 0.347983182  | 0.737584497 | 0.053084396 | 0.878100647 |
| 0.222400405 | 0.153405029  | 6.19E-05    | 0.003736177 | 0.878100647 |
| 0.222400405 | 0.153405029  | 6.19E-05    | 0.003736177 | 0.878100647 |
| 0.222636655 | 0.364902757  | 0.104319013 | 1           | 0.878100647 |
| 0.222636655 | 0.364902757  | 0.104319013 | 1           | 0.878100647 |
| 0.22296802  | -0.39614472  | 1           | 0.242167012 | 0.878100647 |
| 0.223779955 | 0.365957275  | 0.134257478 | 1           | 0.878100647 |
| 0.223871171 | 0.394519492  | 1           | 0.242167012 | 0.878100647 |
| 0.22433272  | 0.113059692  | 3.58E-06    | 0.000324671 | 0.878100647 |
| 0.224342011 | -0.275720379 | 0.307400178 | 0.005827837 | 0.878100647 |
| 0.224574028 | 0.321002802  | 0.034012327 | 0.489952655 | 0.878100647 |
| 0.224621053 | -0.100623799 | 0.000261772 | 5.53E-07    | 0.878100647 |
| 0.224710902 | -0.384856451 | 1           | 0.164911511 | 0.878100647 |
| 0.224793753 | -0.166610535 | 0.016023223 | 4.69E-05    | 0.878100647 |
| 0.225464489 | 0.196193541  | 0.000261772 | 0.025431136 | 0.878100647 |
| 0.225464489 | 0.196193541  | 0.000261772 | 0.025431136 | 0.878100647 |
| 0.225464489 | 0.196193541  | 0.000261772 | 0.025431136 | 0.878100647 |
| 0.22565802  | 0.10700237   | 1.23E-06    | 0.0002997   | 0.878100647 |
| 0.225785014 | -0.403424861 | 1           | 0.489952655 | 0.878100647 |
| 0.225999418 | 0.384878311  | 1           | 0.217058541 | 0.878100647 |
| 0.226050869 | 0.285980343  | 0.016023223 | 0.242167012 | 0.878100647 |
| 0.226340693 | 0.165778637  | 6.77E-05    | 0.006372161 | 0.878100647 |
| 0.226340693 | 0.165778637  | 6.77E-05    | 0.006372161 | 0.878100647 |
| 0.226344572 | 0.283476315  | 0.349433107 | 0.006372161 | 0.878100647 |
| 0.226458872 | -0.3019471   | 0.439859057 | 0.011906673 | 0.878100647 |
| 0.226458872 | -0.3019471   | 0.439859057 | 0.011906673 | 0.878100647 |
| 0.226516973 | 0.163833081  | 0.016023223 | 4.69E-05    | 0.878100647 |
| 0.226723794 | -0.360536355 | 1           | 0.085309726 | 0.878100647 |
| 0.226723794 | -0.360536355 | 1           | 0.085309726 | 0.878100647 |
| 0.226741226 | 0.364527045  | 0.169239932 | 1           | 0.878100647 |
| 0.226742778 | 0.384448122  | 1           | 0.242167012 | 0.878100647 |
| 0.226742778 | 0.384448122  | 1           | 0.242167012 | 0.878100647 |
| 0.226898614 | 0.17021915   | 8.53E-05    | 0.009270366 | 0.878100647 |
| 0.226901822 | -0.371794595 | 1           | 0.129712192 | 0.878100647 |
| 0.226901822 | -0.371794595 | 1           | 0.129712192 | 0.878100647 |
| 0.227056641 | -0.404591888 | 0.584854032 | 1           | 0.878100647 |
| 0.227056641 | -0.404591888 | 0.584854032 | 1           | 0.878100647 |
| 0.227222374 | -0.384969501 | 1           | 0.242167012 | 0.878100647 |
| 0.227919034 | 0.230386917  | 0.001207877 | 0.066020955 | 0.878100647 |
| 0.228214514 | -0.056432244 | 4.58E-06    | 6.53E-09    | 0.878100647 |
| 0.228461077 | 0.284053033  | 0.016023223 | 0.242167012 | 0.878100647 |
| 0.228830955 | 0.406427855  | 0.691111318 | 1           | 0.878100647 |
| 0.228974374 | -0.392069674 | 1           | 0.305102445 | 0.878100647 |
| 0.228974374 | -0.392069674 | 1           | 0.305102445 | 0.878100647 |
| 0.229012396 | 0.218566913  | 0.0008771   | 0.053084396 | 0.878100647 |
| 0.229123698 | -0.400705242 | 0.439859057 | 1           | 0.878100647 |
| 0.229266206 | -0.37219082  | 1           | 0.145037597 | 0.878100647 |
| 0.229343201 | 0.326806795  | 0.043105813 | 0.601859652 | 0.878100647 |
| 0.229343201 | 0.326806795  | 0.043105813 | 0.601859652 | 0.878100647 |
| 0.229343201 | 0.326806795  | 0.043105813 | 0.601859652 | 0.878100647 |
| 0.229343201 | 0.326806795  | 0.043105813 | 0.601859652 | 0.878100647 |
| 0.229343201 | 0.326806795  | 0.043105813 | 0.601859652 | 0.878100647 |
| 0.229343201 | 0.326806795  | 0.043105813 | 0.601859652 | 0.878100647 |
| 0.229343201 | 0.326806795  | 0.043105813 | 0.601859652 | 0.878100647 |
| 0.229455607 | -0.084554526 | 6.77E-05    | 1.54E-07    | 0.878100647 |

|             |              |             |             |             |
|-------------|--------------|-------------|-------------|-------------|
| 0.230987984 | 0.356210222  | 0.104319013 | 1           | 0.878100647 |
| 0.230987984 | 0.356210222  | 0.104319013 | 1           | 0.878100647 |
| 0.231263672 | -0.120056035 | 0.0008771   | 3.06E-06    | 0.878100647 |
| 0.231263672 | -0.120056035 | 0.0008771   | 3.06E-06    | 0.878100647 |
| 0.231530285 | -0.398965346 | 1           | 0.489952655 | 0.878100647 |
| 0.231670563 | 0.154181873  | 6.19E-05    | 0.005827837 | 0.878100647 |
| 0.231670563 | 0.154181873  | 6.19E-05    | 0.005827837 | 0.878100647 |
| 0.231758068 | -0.18979152  | 0.034012327 | 0.000124759 | 0.878100647 |
| 0.231758068 | -0.18979152  | 0.034012327 | 0.000124759 | 0.878100647 |
| 0.231758068 | -0.18979152  | 0.034012327 | 0.000124759 | 0.878100647 |
| 0.231758068 | -0.18979152  | 0.034012327 | 0.000124759 | 0.878100647 |
| 0.231987829 | 0.400281226  | 0.584854032 | 1           | 0.878100647 |
| 0.231987829 | 0.400281226  | 0.584854032 | 1           | 0.878100647 |
| 0.232139942 | 0.401742286  | 1           | 0.489952655 | 0.878100647 |
| 0.232139942 | 0.401742286  | 1           | 0.489952655 | 0.878100647 |
| 0.232215363 | -0.138981355 | 0.004273917 | 9.47E-06    | 0.878100647 |
| 0.232255991 | -0.257712507 | 0.205025676 | 0.002721298 | 0.878100647 |
| 0.232255991 | -0.257712507 | 0.205025676 | 0.002721298 | 0.878100647 |
| 0.232436349 | 0.383844937  | 1           | 0.242167012 | 0.878100647 |
| 0.232630992 | -0.099293939 | 0.000261772 | 5.53E-07    | 0.878100647 |
| 0.232803659 | 0.368456869  | 1           | 0.145037597 | 0.878100647 |
| 0.23295861  | 0.280479306  | 0.349433107 | 0.006372161 | 0.878100647 |
| 0.23300361  | -0.302512818 | 0.439859057 | 0.017403168 | 0.878100647 |
| 0.23300361  | -0.302512818 | 0.439859057 | 0.017403168 | 0.878100647 |
| 0.233091532 | -0.324913507 | 0.584854032 | 0.031639242 | 0.878100647 |
| 0.233486803 | -0.263662525 | 0.205025676 | 0.003736177 | 0.878100647 |
| 0.233486803 | -0.263662525 | 0.205025676 | 0.003736177 | 0.878100647 |
| 0.233501064 | 0.289824826  | 0.412603306 | 0.009270366 | 0.878100647 |
| 0.233617846 | 0.03948389   | 1.75E-09    | 1.54E-07    | 0.878100647 |
| 0.233617846 | 0.03948389   | 1.75E-09    | 1.54E-07    | 0.878100647 |
| 0.233881296 | 0.394510445  | 0.439859057 | 1           | 0.878100647 |
| 0.233881296 | 0.394510445  | 0.439859057 | 1           | 0.878100647 |
| 0.233881296 | 0.394510445  | 0.439859057 | 1           | 0.878100647 |
| 0.233881296 | 0.394510445  | 0.439859057 | 1           | 0.878100647 |
| 0.233909644 | 0.237102185  | 0.001611045 | 0.085309726 | 0.878100647 |
| 0.233909644 | 0.237102185  | 0.001611045 | 0.085309726 | 0.878100647 |
| 0.234118196 | 0.240887741  | 0.003169634 | 0.102782106 | 0.878100647 |
| 0.234274052 | 0.397815013  | 1           | 0.489952655 | 0.878100647 |
| 0.234528033 | -0.40039347  | 1           | 0.601859652 | 0.878100647 |
| 0.234612914 | -0.379241974 | 0.307400178 | 1           | 0.878100647 |
| 0.234612914 | -0.379241974 | 0.307400178 | 1           | 0.878100647 |
| 0.234672405 | 0.184580271  | 0.034012327 | 0.000124759 | 0.878100647 |
| 0.235266351 | -0.2664446   | 0.295435331 | 0.004171959 | 0.878100647 |
| 0.235266351 | -0.2664446   | 0.295435331 | 0.004171959 | 0.878100647 |
| 0.235503015 | 0.117502115  | 4.58E-06    | 0.000596242 | 0.878100647 |
| 0.235503015 | 0.117502115  | 4.58E-06    | 0.000596242 | 0.878100647 |
| 0.235758184 | -0.401162393 | 0.814576593 | 0.850173656 | 0.878100647 |
| 0.235758184 | -0.401162393 | 0.814576593 | 0.850173656 | 0.878100647 |
| 0.23595476  | 0.289440445  | 0.412603306 | 0.009270366 | 0.878100647 |
| 0.236097999 | -0.236975401 | 0.134257478 | 0.001791344 | 0.878100647 |
| 0.236327306 | -0.39108527  | 1           | 0.397942841 | 0.878100647 |
| 0.236897417 | 0.244132231  | 0.00373662  | 0.126792252 | 0.878100647 |
| 0.237082443 | 0.07345376   | 9.36E-08    | 1.65E-05    | 0.878100647 |
| 0.237082443 | 0.07345376   | 9.36E-08    | 1.65E-05    | 0.878100647 |
| 0.237232385 | 0.396842843  | 1           | 0.489952655 | 0.878100647 |
| 0.237232385 | 0.396842843  | 1           | 0.489952655 | 0.878100647 |
| 0.237424146 | -0.143385596 | 0.004526275 | 1.04E-05    | 0.878100647 |
| 0.237624026 | 0.364867721  | 1           | 0.145037597 | 0.878100647 |
| 0.237714896 | -0.126244064 | 0.001207877 | 4.11E-06    | 0.878100647 |
| 0.237714896 | -0.126244064 | 0.001207877 | 4.11E-06    | 0.878100647 |
| 0.237872482 | 0.096412131  | 1.09E-06    | 0.000124759 | 0.878100647 |
| 0.237872482 | 0.096412131  | 1.09E-06    | 0.000124759 | 0.878100647 |
| 0.237872482 | 0.096412131  | 1.09E-06    | 0.000124759 | 0.878100647 |
| 0.238600318 | -0.328201707 | 0.584854032 | 0.045751002 | 0.878100647 |

|             |              |             |             |             |
|-------------|--------------|-------------|-------------|-------------|
| 0.238643554 | -0.187908047 | 0.034012327 | 0.000124759 | 0.878100647 |
| 0.238643554 | -0.187908047 | 0.034012327 | 0.000124759 | 0.878100647 |
| 0.238661065 | 0.38145429   | 0.412603306 | 1           | 0.878100647 |
| 0.238763706 | -0.323126348 | 0.584854032 | 0.031639242 | 0.878100647 |
| 0.238962871 | 0.379544583  | 0.349433107 | 1           | 0.878100647 |
| 0.239002939 | -0.173124182 | 0.024201521 | 7.48E-05    | 0.878100647 |
| 0.23902552  | -0.227881395 | 0.095538718 | 0.001090387 | 0.878100647 |
| 0.23904756  | -0.397721048 | 1           | 0.704162183 | 0.878100647 |
| 0.239326111 | 0.033790234  | 1.44E-09    | 5.53E-08    | 0.878100647 |
| 0.239326111 | 0.033790234  | 1.44E-09    | 5.53E-08    | 0.878100647 |
| 0.239326111 | 0.033790234  | 1.44E-09    | 5.53E-08    | 0.878100647 |
| 0.239326111 | 0.033790234  | 1.44E-09    | 5.53E-08    | 0.878100647 |
| 0.239333751 | 0.10912631   | 3.58E-06    | 0.000324671 | 0.878100647 |
| 0.239544922 | 0.288106834  | 0.412603306 | 0.011906673 | 0.878100647 |
| 0.239794197 | 0.397800713  | 0.737584497 | 0.850173656 | 0.878100647 |
| 0.239889177 | 0.37845368   | 1           | 0.242167012 | 0.878100647 |
| 0.239933416 | 0.176487809  | 0.000189446 | 0.011906673 | 0.878100647 |
| 0.240026643 | -0.389068645 | 0.439859057 | 1           | 0.878100647 |
| 0.240132297 | 0.362383198  | 0.19926681  | 1           | 0.878100647 |
| 0.24013824  | 0.313630638  | 0.03951775  | 0.489952655 | 0.878100647 |
| 0.240293033 | -0.202753195 | 0.043105813 | 0.000324671 | 0.878100647 |
| 0.240293033 | -0.202753195 | 0.043105813 | 0.000324671 | 0.878100647 |
| 0.240293033 | -0.202753195 | 0.043105813 | 0.000324671 | 0.878100647 |
| 0.240293033 | -0.202753195 | 0.043105813 | 0.000324671 | 0.878100647 |
| 0.240734556 | 0.270020967  | 0.307400178 | 0.006372161 | 0.878100647 |
| 0.240734556 | 0.270020967  | 0.307400178 | 0.006372161 | 0.878100647 |
| 0.241346574 | 0.202160374  | 0.0008771   | 0.031639242 | 0.878100647 |
| 0.241538288 | -0.378318274 | 1           | 0.242167012 | 0.878100647 |
| 0.241538288 | -0.378318274 | 1           | 0.242167012 | 0.878100647 |
| 0.24161012  | 0.394885193  | 1           | 0.645935818 | 0.878100647 |
| 0.241682643 | 0.350767885  | 1           | 0.10273905  | 0.878100647 |
| 0.241891011 | 0.348806722  | 1           | 0.085309726 | 0.878100647 |
| 0.241891011 | 0.348806722  | 1           | 0.085309726 | 0.878100647 |
| 0.242384383 | -0.394133384 | 1           | 0.645935818 | 0.878100647 |
| 0.242384383 | -0.394133384 | 1           | 0.645935818 | 0.878100647 |
| 0.242853866 | 0.167191762  | 8.53E-05    | 0.009270366 | 0.878100647 |
| 0.243062623 | -0.393146025 | 1           | 0.601859652 | 0.878100647 |
| 0.243062623 | -0.393146025 | 1           | 0.601859652 | 0.878100647 |
| 0.243062623 | -0.393146025 | 1           | 0.601859652 | 0.878100647 |
| 0.243092463 | 0.377150109  | 1           | 0.242167012 | 0.878100647 |
| 0.243312791 | 0.389412671  | 0.439859057 | 1           | 0.878100647 |
| 0.243374809 | 0.335662463  | 0.737584497 | 0.060775899 | 0.878100647 |
| 0.243374809 | 0.335662463  | 0.737584497 | 0.060775899 | 0.878100647 |
| 0.243374809 | 0.335662463  | 0.737584497 | 0.060775899 | 0.878100647 |
| 0.243985058 | -0.384217001 | 1           | 0.397942841 | 0.878100647 |
| 0.244396885 | -0.202509556 | 0.043105813 | 0.000324671 | 0.878100647 |
| 0.244735134 | -0.393424737 | 0.989933981 | 0.704162183 | 0.878100647 |
| 0.244795231 | 0.228751438  | 0.095538718 | 0.001791344 | 0.878100647 |
| 0.244923079 | 0.183128313  | 0.000261772 | 0.02341474  | 0.878100647 |
| 0.244923079 | 0.183128313  | 0.000261772 | 0.02341474  | 0.878100647 |
| 0.245360559 | 0.337292891  | 0.095006685 | 0.850173656 | 0.878100647 |
| 0.245360559 | 0.337292891  | 0.095006685 | 0.850173656 | 0.878100647 |
| 0.246002679 | 0.391316584  | 0.584854032 | 1           | 0.878100647 |
| 0.24647212  | -0.235374714 | 0.134257478 | 0.002093839 | 0.878100647 |
| 0.246495578 | 0.206142875  | 0.0008771   | 0.042826979 | 0.878100647 |
| 0.246588375 | 0.379389789  | 0.412603306 | 1           | 0.878100647 |
| 0.246599    | 0.332723612  | 0.087427713 | 0.704162183 | 0.878100647 |
| 0.246669981 | 0.338908706  | 0.881481882 | 0.085309726 | 0.878100647 |
| 0.246945694 | 0.391971447  | 0.881481882 | 0.850173656 | 0.878100647 |
| 0.247018239 | 0.391789488  | 0.737584497 | 1           | 0.878100647 |
| 0.247019719 | 0.128384269  | 0.002297238 | 5.99E-06    | 0.878100647 |
| 0.247198156 | 0.31704461   | 0.043105813 | 0.601859652 | 0.878100647 |
| 0.247297494 | -0.171004226 | 0.024201521 | 0.000115129 | 0.878100647 |
| 0.247332891 | 0.185099424  | 0.000261772 | 0.02341474  | 0.878100647 |

|             |              |             |             |             |
|-------------|--------------|-------------|-------------|-------------|
| 0.247332891 | 0.185099424  | 0.000261772 | 0.02341474  | 0.878100647 |
| 0.247395382 | -0.314211603 | 0.584854032 | 0.031639242 | 0.878100647 |
| 0.247480782 | 0.272185373  | 0.34036444  | 0.006372161 | 0.878100647 |
| 0.247688998 | 0.343246733  | 0.989933981 | 0.085309726 | 0.878100647 |
| 0.247709099 | 0.384165522  | 0.439859057 | 1           | 0.878100647 |
| 0.247839236 | 0.264447328  | 0.010835964 | 0.242167012 | 0.878100647 |
| 0.24805702  | 0.267254621  | 0.307400178 | 0.006372161 | 0.878100647 |
| 0.24805702  | 0.267254621  | 0.307400178 | 0.006372161 | 0.878100647 |
| 0.248097702 | 0.312058205  | 0.584854032 | 0.031639242 | 0.878100647 |
| 0.248097702 | 0.312058205  | 0.584854032 | 0.031639242 | 0.878100647 |
| 0.248321088 | 0.172684779  | 0.000228282 | 0.011906673 | 0.878100647 |
| 0.248321088 | 0.172684779  | 0.000228282 | 0.011906673 | 0.878100647 |
| 0.248967818 | 0.320398035  | 0.584854032 | 0.045751002 | 0.878100647 |
| 0.249385838 | 0.382628998  | 0.439859057 | 1           | 0.878100647 |
| 0.249385838 | 0.382628998  | 0.439859057 | 1           | 0.878100647 |
| 0.24955985  | -0.37686889  | 1           | 0.364167203 | 0.878100647 |
| 0.249859719 | -0.303918842 | 0.439859057 | 0.025431136 | 0.878100647 |
| 0.249859719 | -0.303918842 | 0.439859057 | 0.025431136 | 0.878100647 |
| 0.249859719 | -0.303918842 | 0.439859057 | 0.025431136 | 0.878100647 |
| 0.249859719 | -0.303918842 | 0.439859057 | 0.025431136 | 0.878100647 |
| 0.249923057 | 0.360974185  | 1           | 0.164911511 | 0.878100647 |
| 0.249988558 | -0.085943589 | 0.000153763 | 2.98E-07    | 0.878100647 |
| 0.250094557 | 0.10425847   | 2.89E-06    | 0.0002997   | 0.878100647 |
| 0.250430365 | -0.376157483 | 0.412603306 | 1           | 0.878100647 |
| 0.250504777 | -0.236493196 | 0.169239932 | 0.002093839 | 0.878100647 |
| 0.250504777 | -0.236493196 | 0.169239932 | 0.002093839 | 0.878100647 |
| 0.251119287 | -0.341469999 | 0.989933981 | 0.085309726 | 0.878100647 |
| 0.251197218 | 0.385395389  | 1           | 0.489952655 | 0.878100647 |
| 0.251202426 | 0.267736953  | 0.307400178 | 0.006372161 | 0.878100647 |
| 0.25153129  | 0.114550382  | 0.0008771   | 3.06E-06    | 0.878100647 |
| 0.25153129  | 0.114550382  | 0.0008771   | 3.06E-06    | 0.878100647 |
| 0.251541352 | 0.263302826  | 0.010835964 | 0.242167012 | 0.878100647 |
| 0.251606047 | 0.380063991  | 1           | 0.416730107 | 0.878100647 |
| 0.251652978 | 0.380950695  | 0.439859057 | 1           | 0.878100647 |
| 0.252029149 | 0.305544574  | 0.584854032 | 0.029310175 | 0.878100647 |
| 0.252443871 | -0.124356127 | 0.001207877 | 5.99E-06    | 0.878100647 |
| 0.252443871 | -0.124356127 | 0.001207877 | 5.99E-06    | 0.878100647 |
| 0.252630181 | 0.089478249  | 1.09E-06    | 0.000115129 | 0.878100647 |
| 0.252864038 | -0.176178953 | 0.030989574 | 0.000124759 | 0.878100647 |
| 0.252956828 | 0.293065786  | 0.439859057 | 0.02341474  | 0.878100647 |
| 0.253000969 | -0.38664164  | 1           | 0.704162183 | 0.878100647 |
| 0.253026964 | -0.374594436 | 1           | 0.364167203 | 0.878100647 |
| 0.253295231 | 0.386589196  | 1           | 0.704162183 | 0.878100647 |
| 0.25341489  | 0.321762902  | 0.691111318 | 0.053084396 | 0.878100647 |
| 0.253737058 | -0.229149868 | 0.104319013 | 0.001791344 | 0.878100647 |
| 0.253737058 | -0.229149868 | 0.104319013 | 0.001791344 | 0.878100647 |
| 0.253776199 | 0.330033561  | 0.737584497 | 0.061934943 | 0.878100647 |
| 0.253776199 | 0.330033561  | 0.737584497 | 0.061934943 | 0.878100647 |
| 0.253910658 | 0.338800812  | 0.120559922 | 1           | 0.878100647 |
| 0.254015335 | -0.384003193 | 0.584854032 | 1           | 0.878100647 |
| 0.254058877 | -0.35967091  | 1           | 0.164911511 | 0.878100647 |
| 0.254173505 | 0.364845946  | 1           | 0.242167012 | 0.878100647 |
| 0.254667089 | 0.287653717  | 0.030989574 | 0.397942841 | 0.878100647 |
| 0.254919055 | 0.257918558  | 0.010835964 | 0.164911511 | 0.878100647 |
| 0.255310857 | 0.38374287   | 1           | 0.704162183 | 0.878100647 |
| 0.255521606 | 0.07861662   | 3.18E-07    | 4.69E-05    | 0.878100647 |
| 0.255958066 | 0.37570412   | 0.439859057 | 1           | 0.878100647 |
| 0.256124458 | 0.305737969  | 0.584854032 | 0.031639242 | 0.878100647 |
| 0.256175699 | 0.348272839  | 1           | 0.145037597 | 0.878100647 |
| 0.256175699 | 0.348272839  | 1           | 0.145037597 | 0.878100647 |
| 0.256175699 | 0.348272839  | 1           | 0.145037597 | 0.878100647 |
| 0.256242085 | 0.214192459  | 0.001207877 | 0.060775899 | 0.878100647 |
| 0.256242085 | 0.214192459  | 0.001207877 | 0.060775899 | 0.878100647 |
| 0.256242085 | 0.214192459  | 0.001207877 | 0.060775899 | 0.878100647 |

|             |              |             |             |             |
|-------------|--------------|-------------|-------------|-------------|
| 0.256328952 | 0.332678453  | 0.881481882 | 0.085309726 | 0.878100647 |
| 0.256496065 | 0.38007698   | 1           | 0.489952655 | 0.878100647 |
| 0.25674464  | 0.238993794  | 0.004526275 | 0.126792252 | 0.878100647 |
| 0.256853977 | 0.320831034  | 0.075374611 | 0.704162183 | 0.878100647 |
| 0.256853977 | 0.320831034  | 0.075374611 | 0.704162183 | 0.878100647 |
| 0.256853977 | 0.320831034  | 0.075374611 | 0.704162183 | 0.878100647 |
| 0.256853977 | 0.320831034  | 0.075374611 | 0.704162183 | 0.878100647 |
| 0.256985083 | 0.37643065   | 0.439859057 | 1           | 0.878100647 |
| 0.256985083 | 0.37643065   | 0.439859057 | 1           | 0.878100647 |
| 0.257694327 | -0.311701565 | 0.584854032 | 0.042826979 | 0.878100647 |
| 0.257694327 | -0.311701565 | 0.584854032 | 0.042826979 | 0.878100647 |
| 0.257694327 | -0.311701565 | 0.584854032 | 0.042826979 | 0.878100647 |
| 0.258026916 | -0.17076726  | 0.025193624 | 0.000115129 | 0.878100647 |
| 0.258532149 | 0.315912208  | 0.584854032 | 0.052574033 | 0.878100647 |
| 0.258541972 | -0.142185698 | 0.008580492 | 1.80E-05    | 0.878100647 |
| 0.258541972 | -0.142185698 | 0.008580492 | 1.80E-05    | 0.878100647 |
| 0.258669718 | 0.319602049  | 0.691111318 | 0.060775899 | 0.878100647 |
| 0.258731571 | -0.101003817 | 0.000467492 | 8.55E-07    | 0.878100647 |
| 0.258844076 | 0.379797348  | 0.584854032 | 1           | 0.878100647 |
| 0.259423223 | -0.306822224 | 0.584854032 | 0.031639242 | 0.878100647 |
| 0.259509955 | 0.217024158  | 0.095006685 | 0.001090387 | 0.878100647 |
| 0.259509955 | 0.217024158  | 0.095006685 | 0.001090387 | 0.878100647 |
| 0.259509955 | 0.217024158  | 0.095006685 | 0.001090387 | 0.878100647 |
| 0.259588975 | 0.338991119  | 0.169239932 | 1           | 0.878100647 |
| 0.259650068 | 0.38170028   | 0.737584497 | 1           | 0.878100647 |
| 0.259650068 | 0.38170028   | 0.737584497 | 1           | 0.878100647 |
| 0.259650068 | 0.38170028   | 0.737584497 | 1           | 0.878100647 |
| 0.260728417 | 0.376296737  | 1           | 0.489952655 | 0.878100647 |
| 0.260802656 | -0.148976473 | 0.009746439 | 4.69E-05    | 0.878100647 |
| 0.261115894 | 0.327040049  | 0.737584497 | 0.06824239  | 0.878100647 |
| 0.261115894 | 0.327040049  | 0.737584497 | 0.06824239  | 0.878100647 |
| 0.261115894 | 0.327040049  | 0.737584497 | 0.06824239  | 0.878100647 |
| 0.261115894 | 0.327040049  | 0.737584497 | 0.06824239  | 0.878100647 |
| 0.261115894 | 0.327040049  | 0.737584497 | 0.06824239  | 0.878100647 |
| 0.261115894 | 0.327040049  | 0.737584497 | 0.06824239  | 0.878100647 |
| 0.261327231 | 0.17094504   | 0.000249829 | 0.011906673 | 0.878100647 |
| 0.261336069 | -0.380384922 | 0.989933981 | 0.704162183 | 0.878100647 |
| 0.261588539 | 0.210935879  | 0.001207877 | 0.060775899 | 0.878100647 |
| 0.261588539 | 0.210935879  | 0.001207877 | 0.060775899 | 0.878100647 |
| 0.261642049 | 0.353230809  | 1           | 0.164911511 | 0.878100647 |
| 0.26173675  | 0.210571532  | 0.075374611 | 0.001090387 | 0.878100647 |
| 0.262305768 | 0.232046199  | 0.169239932 | 0.002420613 | 0.878100647 |
| 0.262551193 | -0.234563445 | 0.169239932 | 0.002420613 | 0.878100647 |
| 0.262551193 | -0.234563445 | 0.169239932 | 0.002420613 | 0.878100647 |
| 0.262788978 | -0.152864574 | 6.77E-05    | 0.006372161 | 0.878100647 |
| 0.263066874 | -0.101301723 | 0.000467492 | 8.55E-07    | 0.878100647 |
| 0.263066874 | -0.101301723 | 0.000467492 | 8.55E-07    | 0.878100647 |
| 0.263066874 | -0.101301723 | 0.000467492 | 8.55E-07    | 0.878100647 |
| 0.263066874 | -0.101301723 | 0.000467492 | 8.55E-07    | 0.878100647 |
| 0.263250598 | -0.222811828 | 0.095538718 | 0.001791344 | 0.878100647 |
| 0.26339159  | -0.330041334 | 0.104319013 | 1           | 0.878100647 |
| 0.263467191 | -0.143363249 | 0.008580492 | 4.35E-05    | 0.878100647 |
| 0.263467191 | -0.143363249 | 0.008580492 | 4.35E-05    | 0.878100647 |
| 0.263467191 | -0.143363249 | 0.008580492 | 4.35E-05    | 0.878100647 |
| 0.263721505 | 0.378590634  | 0.989933981 | 0.850173656 | 0.878100647 |
| 0.263721505 | 0.378590634  | 0.989933981 | 0.850173656 | 0.878100647 |
| 0.263747789 | 0.373578053  | 1           | 0.489952655 | 0.878100647 |
| 0.263747789 | 0.373578053  | 1           | 0.489952655 | 0.878100647 |
| 0.263958007 | -0.372720734 | 1           | 0.489952655 | 0.878100647 |
| 0.264149264 | 0.243092851  | 0.19926681  | 0.003736177 | 0.878100647 |
| 0.264149264 | 0.243092851  | 0.19926681  | 0.003736177 | 0.878100647 |
| 0.264610318 | -0.367295888 | 0.439859057 | 1           | 0.878100647 |
| 0.264662319 | -0.265009918 | 0.34036444  | 0.009270366 | 0.878100647 |
| 0.264662319 | -0.265009918 | 0.34036444  | 0.009270366 | 0.878100647 |



|             |              |             |             |             |
|-------------|--------------|-------------|-------------|-------------|
| 0.264715587 | -0.296951509 | 0.439859057 | 0.029310175 | 0.878100647 |
| 0.264736038 | 0.127053085  | 1.56E-05    | 0.001791344 | 0.878100647 |
| 0.264854673 | -0.356261185 | 1           | 0.242167012 | 0.878100647 |
| 0.264901189 | 0.293623147  | 0.439859057 | 0.025431136 | 0.878100647 |
| 0.2649235   | -0.372451943 | 0.493333254 | 1           | 0.878100647 |
| 0.265147111 | -0.329955351 | 0.120559922 | 1           | 0.878100647 |
| 0.265263616 | 0.138071352  | 0.004526275 | 1.65E-05    | 0.878100647 |
| 0.26534533  | -0.368273287 | 0.439859057 | 1           | 0.878100647 |
| 0.265625146 | -0.305382511 | 0.584854032 | 0.042826979 | 0.878100647 |
| 0.265657485 | 0.316451002  | 0.075374611 | 0.704162183 | 0.878100647 |
| 0.265741505 | -0.376630763 | 1           | 0.704162183 | 0.878100647 |
| 0.265929512 | 0.336590507  | 1           | 0.126792252 | 0.878100647 |
| 0.265929512 | 0.336590507  | 1           | 0.126792252 | 0.878100647 |
| 0.266516266 | 0.329446042  | 0.134257478 | 1           | 0.878100647 |
| 0.266516266 | 0.329446042  | 0.134257478 | 1           | 0.878100647 |
| 0.266599991 | 0.200143508  | 0.0008771   | 0.045751002 | 0.878100647 |
| 0.266599991 | 0.200143508  | 0.0008771   | 0.045751002 | 0.878100647 |
| 0.26660091  | -0.133751743 | 0.004273917 | 1.65E-05    | 0.878100647 |
| 0.26660091  | -0.133751743 | 0.004273917 | 1.65E-05    | 0.878100647 |
| 0.26661086  | 0.285724344  | 0.439859057 | 0.02341474  | 0.878100647 |
| 0.26661086  | 0.285724344  | 0.439859057 | 0.02341474  | 0.878100647 |
| 0.26661086  | 0.285724344  | 0.439859057 | 0.02341474  | 0.878100647 |
| 0.266652969 | -0.31868511  | 0.737584497 | 0.061934943 | 0.878100647 |
| 0.266652969 | -0.31868511  | 0.737584497 | 0.061934943 | 0.878100647 |
| 0.266652969 | -0.31868511  | 0.737584497 | 0.061934943 | 0.878100647 |
| 0.266685164 | 0.139849098  | 6.19E-05    | 0.003736177 | 0.878100647 |
| 0.266833997 | -0.160324611 | 0.018163994 | 0.000108916 | 0.878100647 |
| 0.26692462  | 0.355096234  | 0.307400178 | 1           | 0.878100647 |
| 0.266977502 | 0.235625467  | 0.004526275 | 0.126792252 | 0.878100647 |
| 0.266977502 | 0.235625467  | 0.004526275 | 0.126792252 | 0.878100647 |
| 0.267178457 | -0.349329406 | 1           | 0.164911511 | 0.878100647 |
| 0.267178457 | -0.349329406 | 1           | 0.164911511 | 0.878100647 |
| 0.267441332 | 0.253020648  | 0.295435331 | 0.006372161 | 0.878100647 |
| 0.267643815 | -0.368065817 | 1           | 0.489952655 | 0.878100647 |
| 0.267662274 | 0.369504962  | 0.439859057 | 1           | 0.878100647 |
| 0.267662274 | 0.369504962  | 0.439859057 | 1           | 0.878100647 |
| 0.267847236 | -0.249051471 | 0.205025676 | 0.005827837 | 0.878100647 |
| 0.267914242 | 0.32692125   | 0.881481882 | 0.085309726 | 0.878100647 |
| 0.268284884 | 0.361680687  | 0.412603306 | 1           | 0.878100647 |
| 0.268507389 | 0.371069964  | 1           | 0.489952655 | 0.878100647 |
| 0.268534821 | -0.375006749 | 0.881481882 | 1           | 0.878100647 |
| 0.268544806 | -0.373759163 | 1           | 0.704162183 | 0.878100647 |
| 0.268595875 | -0.098461427 | 0.000467492 | 8.55E-07    | 0.878100647 |
| 0.268653947 | 0.291777236  | 0.439859057 | 0.025431136 | 0.878100647 |
| 0.268689914 | 0.342440313  | 0.205025676 | 1           | 0.878100647 |
| 0.269386518 | -0.371486553 | 1           | 0.601859652 | 0.878100647 |
| 0.269429035 | 0.344099293  | 1           | 0.145037597 | 0.878100647 |
| 0.269429035 | 0.344099293  | 1           | 0.145037597 | 0.878100647 |
| 0.269429035 | 0.344099293  | 1           | 0.145037597 | 0.878100647 |
| 0.269429035 | 0.344099293  | 1           | 0.145037597 | 0.878100647 |
| 0.269429035 | 0.344099293  | 1           | 0.145037597 | 0.878100647 |
| 0.269429035 | 0.344099293  | 1           | 0.145037597 | 0.878100647 |
| 0.269523706 | -0.109103617 | 0.0008771   | 3.06E-06    | 0.878100647 |
| 0.269523706 | -0.109103617 | 0.0008771   | 3.06E-06    | 0.878100647 |
| 0.269637393 | 0.370419815  | 0.584854032 | 1           | 0.878100647 |
| 0.269637393 | 0.370419815  | 0.584854032 | 1           | 0.878100647 |
| 0.269868678 | 0.373523259  | 1           | 0.704162183 | 0.878100647 |
| 0.269868678 | 0.373523259  | 1           | 0.704162183 | 0.878100647 |
| 0.269992692 | 0.345405926  | 1           | 0.164911511 | 0.878100647 |
| 0.27005528  | -0.185328349 | 0.035148121 | 0.000324671 | 0.878100647 |
| 0.270131587 | -0.34417921  | 1           | 0.145037597 | 0.878100647 |
| 0.270479132 | -0.357514673 | 1           | 0.305102445 | 0.878100647 |
| 0.270479132 | -0.357514673 | 1           | 0.305102445 | 0.878100647 |
| 0.270563584 | -0.34012244  | 1           | 0.145037597 | 0.878100647 |

|             |              |             |             |             |
|-------------|--------------|-------------|-------------|-------------|
| 0.270937674 | 0.066493653  | 9.36E-08    | 9.47E-06    | 0.878100647 |
| 0.271451429 | 0.293022993  | 0.043105813 | 0.489952655 | 0.878100647 |
| 0.271474512 | -0.129219863 | 0.00373662  | 1.04E-05    | 0.878100647 |
| 0.271533506 | 0.276992675  | 0.412603306 | 0.02341474  | 0.878100647 |
| 0.271533506 | 0.276992675  | 0.412603306 | 0.02341474  | 0.878100647 |
| 0.271626214 | 0.05405925   | 2.61E-08    | 3.06E-06    | 0.878100647 |
| 0.271626214 | 0.05405925   | 2.61E-08    | 3.06E-06    | 0.878100647 |
| 0.271626214 | 0.05405925   | 2.61E-08    | 3.06E-06    | 0.878100647 |
| 0.271754365 | 0.132938869  | 0.004273917 | 1.65E-05    | 0.8914411   |
| 0.271754365 | 0.132938869  | 0.004273917 | 1.65E-05    | 0.8914411   |
| 0.271901808 | 0.31224506   | 0.691111318 | 0.060775899 | 0.8914411   |
| 0.272301508 | -0.350854879 | 0.307400178 | 1           | 0.8914411   |
| 0.272383512 | 0.309186011  | 0.584854032 | 0.060775899 | 0.8914411   |
| 0.272584772 | -0.300239263 | 0.584854032 | 0.042826979 | 0.8914411   |
| 0.272732535 | 0.371558969  | 1           | 0.704162183 | 0.8914411   |
| 0.273366531 | -0.237551733 | 0.19926681  | 0.003736177 | 0.8914411   |
| 0.273560155 | 0.295236732  | 0.043105813 | 0.489952655 | 0.8914411   |
| 0.273625793 | -0.281660628 | 0.439859057 | 0.02341474  | 0.8914411   |
| 0.273627173 | 0.368413216  | 1           | 0.601859652 | 0.8914411   |
| 0.273627173 | 0.368413216  | 1           | 0.601859652 | 0.8914411   |
| 0.273954994 | -0.369871772 | 1           | 0.704162183 | 0.8914411   |
| 0.274506068 | 0.247802581  | 0.010835964 | 0.164911511 | 0.8914411   |
| 0.274750073 | 0.215935732  | 0.095538718 | 0.001791344 | 0.8914411   |
| 0.274750073 | 0.215935732  | 0.095538718 | 0.001791344 | 0.8914411   |
| 0.274889604 | 0.23331005   | 0.192696374 | 0.003736177 | 0.8914411   |
| 0.275251132 | -0.289624381 | 0.439859057 | 0.029310175 | 0.8914411   |
| 0.275373419 | 0.166472374  | 0.000261772 | 0.011906673 | 0.8914411   |
| 0.275408335 | 0.165962172  | 0.000249829 | 0.011906673 | 0.8914411   |
| 0.276126427 | 0.17630592   | 0.000467492 | 0.02341474  | 0.8914411   |
| 0.276126427 | 0.17630592   | 0.000467492 | 0.02341474  | 0.8914411   |
| 0.276671937 | 0.084479086  | 1.09E-06    | 7.48E-05    | 0.8914411   |
| 0.276895662 | 0.218182863  | 0.095538718 | 0.002093839 | 0.8914411   |
| 0.276895662 | 0.218182863  | 0.095538718 | 0.002093839 | 0.8914411   |
| 0.276895662 | 0.218182863  | 0.095538718 | 0.002093839 | 0.8914411   |
| 0.277025808 | 0.27740878   | 0.034012327 | 0.397942841 | 0.8914411   |
| 0.277203188 | -0.161361884 | 0.018394332 | 0.000115129 | 0.8914411   |
| 0.277203188 | -0.161361884 | 0.018394332 | 0.000115129 | 0.8914411   |
| 0.277525356 | 0.236854954  | 0.19926681  | 0.004171959 | 0.8914411   |
| 0.27840638  | 0.263460881  | 0.024201521 | 0.242167012 | 0.8914411   |
| 0.278552453 | -0.152015879 | 0.016023223 | 6.41E-05    | 0.8914411   |
| 0.27883096  | -0.361743043 | 1           | 0.489952655 | 0.8914411   |
| 0.27885399  | 0.307804261  | 0.691111318 | 0.060775899 | 0.8914411   |
| 0.279236467 | -0.206635094 | 0.075374611 | 0.001090387 | 0.8914411   |
| 0.279524245 | 0.074242128  | 3.18E-07    | 4.69E-05    | 0.8914411   |
| 0.279813246 | -0.223576059 | 0.169239932 | 0.002420613 | 0.8914411   |
| 0.279813246 | -0.223576059 | 0.169239932 | 0.002420613 | 0.8914411   |
| 0.279813246 | -0.223576059 | 0.169239932 | 0.002420613 | 0.8914411   |
| 0.280005894 | -0.126238258 | 0.003169634 | 1.04E-05    | 0.8914411   |
| 0.280129649 | -0.35338217  | 0.439859057 | 1           | 0.8914411   |
| 0.28029383  | 0.145664557  | 6.77E-05    | 0.005827837 | 0.8914411   |
| 0.28029383  | 0.145664557  | 6.77E-05    | 0.005827837 | 0.8914411   |
| 0.280691329 | 0.064274123  | 9.36E-08    | 9.47E-06    | 0.8914411   |
| 0.280691329 | 0.064274123  | 9.36E-08    | 9.47E-06    | 0.8914411   |
| 0.28077481  | -0.117968026 | 0.001207877 | 9.47E-06    | 0.8914411   |
| 0.28077481  | -0.117968026 | 0.001207877 | 9.47E-06    | 0.8914411   |
| 0.2813078   | -0.362899918 | 0.584854032 | 1           | 0.8914411   |
| 0.281342048 | -0.36521071  | 0.737584497 | 1           | 0.8914411   |
| 0.281367452 | -0.305244791 | 0.584854032 | 0.060775899 | 0.8914411   |
| 0.281524695 | 0.249028399  | 0.295435331 | 0.006372161 | 0.8914411   |
| 0.281524695 | 0.249028399  | 0.295435331 | 0.006372161 | 0.8914411   |
| 0.281907087 | -0.356236133 | 0.439859057 | 1           | 0.8914411   |
| 0.281907087 | -0.356236133 | 0.439859057 | 1           | 0.8914411   |
| 0.282033408 | -0.3516396   | 1           | 0.364167203 | 0.8914411   |
| 0.282072235 | 0.096663052  | 3.58E-06    | 0.0002997   | 0.8914411   |

|             |              |             |             |           |
|-------------|--------------|-------------|-------------|-----------|
| 0.282092308 | -0.364176058 | 0.737584497 | 1           | 0.8914411 |
| 0.282281809 | -0.357227698 | 1           | 0.489952655 | 0.8914411 |
| 0.282614565 | 0.35908576   | 1           | 0.489952655 | 0.8914411 |
| 0.282720736 | -0.221809655 | 0.134257478 | 0.002420613 | 0.8914411 |
| 0.282720736 | -0.221809655 | 0.134257478 | 0.002420613 | 0.8914411 |
| 0.282805532 | 0.265206863  | 0.030989574 | 0.305102445 | 0.8914411 |
| 0.282805532 | 0.265206863  | 0.030989574 | 0.305102445 | 0.8914411 |
| 0.282904692 | -0.29306578  | 0.584854032 | 0.042826979 | 0.8914411 |
| 0.283081145 | 0.362473506  | 0.584854032 | 1           | 0.8914411 |
| 0.2831026   | -0.123784585 | 0.003169634 | 9.47E-06    | 0.8914411 |
| 0.283691395 | 0.325557915  | 0.192696374 | 1           | 0.8914411 |
| 0.283691395 | 0.325557915  | 0.192696374 | 1           | 0.8914411 |
| 0.283939883 | -0.276507022 | 0.439859057 | 0.025431136 | 0.8914411 |
| 0.283939883 | -0.276507022 | 0.439859057 | 0.025431136 | 0.8914411 |
| 0.284037161 | 0.30605552   | 0.095006685 | 0.704162183 | 0.8914411 |
| 0.284037161 | 0.30605552   | 0.095006685 | 0.704162183 | 0.8914411 |
| 0.284078361 | -0.106747978 | 0.0008771   | 3.47E-06    | 0.8914411 |
| 0.28416987  | -0.359350575 | 0.584854032 | 1           | 0.8914411 |
| 0.284172874 | -0.34551581  | 1           | 0.242167012 | 0.8914411 |
| 0.284231683 | -0.356289792 | 1           | 0.489952655 | 0.8914411 |
| 0.284231683 | -0.356289792 | 1           | 0.489952655 | 0.8914411 |
| 0.284291267 | -0.363175681 | 0.989933981 | 1           | 0.8914411 |
| 0.28434903  | -0.362727505 | 1           | 0.704162183 | 0.8914411 |
| 0.284610052 | 0.362921306  | 0.881481882 | 1           | 0.8914411 |
| 0.284752188 | -0.217005831 | 0.104319013 | 0.002093839 | 0.8914411 |
| 0.285061414 | 0.174867258  | 0.000467492 | 0.02341474  | 0.8914411 |
| 0.285210602 | 0.313533672  | 0.737584497 | 0.085309726 | 0.8914411 |
| 0.285644707 | -0.307918668 | 0.737584497 | 0.066020955 | 0.8914411 |
| 0.285878447 | 0.286356174  | 0.439859057 | 0.031639242 | 0.8914411 |
| 0.285878447 | 0.286356174  | 0.439859057 | 0.031639242 | 0.8914411 |
| 0.285878776 | 0.35477983   | 1           | 0.489952655 | 0.8914411 |
| 0.286015971 | 0.289708133  | 0.584854032 | 0.041232736 | 0.8914411 |
| 0.286015971 | 0.289708133  | 0.584854032 | 0.041232736 | 0.8914411 |
| 0.286068746 | 0.275916678  | 0.439859057 | 0.025431136 | 0.8914411 |
| 0.286068746 | 0.275916678  | 0.439859057 | 0.025431136 | 0.8914411 |
| 0.286137466 | 0.243396601  | 0.273258425 | 0.006372161 | 0.8914411 |
| 0.286807757 | 0.297280679  | 0.075374611 | 0.601859652 | 0.8914411 |
| 0.28703494  | 0.332081581  | 1           | 0.164911511 | 0.8914411 |
| 0.287204973 | -0.069250883 | 6.19E-05    | 9.79E-08    | 0.8914411 |
| 0.287390731 | 0.261626378  | 0.412603306 | 0.011906673 | 0.8914411 |
| 0.287581193 | 0.349427709  | 0.439859057 | 1           | 0.8914411 |
| 0.288240822 | 0.140756243  | 0.00974133  | 4.69E-05    | 0.8914411 |
| 0.288242242 | 0.314808366  | 0.134257478 | 0.850173656 | 0.8914411 |
| 0.288280937 | 0.358860801  | 1           | 0.704162183 | 0.8914411 |
| 0.288280937 | 0.358860801  | 1           | 0.704162183 | 0.8914411 |
| 0.288280937 | 0.358860801  | 1           | 0.704162183 | 0.8914411 |
| 0.288280937 | 0.358860801  | 1           | 0.704162183 | 0.8914411 |
| 0.288280937 | 0.358860801  | 1           | 0.704162183 | 0.8914411 |
| 0.288280937 | 0.358860801  | 1           | 0.704162183 | 0.8914411 |
| 0.288385842 | 0.151590133  | 0.000155445 | 0.006372161 | 0.8914411 |
| 0.288385842 | 0.151590133  | 0.000155445 | 0.006372161 | 0.8914411 |
| 0.288420992 | 0.329155818  | 1           | 0.145037597 | 0.8914411 |
| 0.28861013  | -0.236445444 | 0.205025676 | 0.005827837 | 0.8914411 |
| 0.28861013  | -0.236445444 | 0.205025676 | 0.005827837 | 0.8914411 |
| 0.288800465 | 0.188178978  | 0.043105813 | 0.000596242 | 0.8914411 |
| 0.288800465 | 0.188178978  | 0.043105813 | 0.000596242 | 0.8914411 |
| 0.288903549 | 0.145204707  | 8.53E-05    | 0.006372161 | 0.8914411 |
| 0.290191154 | 0.357913103  | 0.737584497 | 1           | 0.8914411 |
| 0.290285009 | -0.331350705 | 1           | 0.164911511 | 0.8914411 |
| 0.290435369 | 0.342618652  | 0.412603306 | 1           | 0.8914411 |
| 0.290529001 | 0.142925284  | 8.53E-05    | 0.005827837 | 0.8914411 |
| 0.290529001 | 0.142925284  | 8.53E-05    | 0.005827837 | 0.8914411 |
| 0.290540493 | 0.058040131  | 4.36E-08    | 4.11E-06    | 0.8914411 |
| 0.290540493 | 0.058040131  | 4.36E-08    | 4.11E-06    | 0.8914411 |

|             |              |             |             |           |
|-------------|--------------|-------------|-------------|-----------|
| 0.290643218 | 0.119412609  | 1.56E-05    | 0.001791344 | 0.8914411 |
| 0.290662713 | -0.220752309 | 0.169239932 | 0.002420613 | 0.8914411 |
| 0.291141267 | 0.207499282  | 0.003169634 | 0.066020955 | 0.8914411 |
| 0.291147232 | 0.265971707  | 0.034012327 | 0.364167203 | 0.8914411 |
| 0.291147232 | 0.265971707  | 0.034012327 | 0.364167203 | 0.8914411 |
| 0.292339597 | -0.35478432  | 1           | 0.645935818 | 0.8914411 |
| 0.29249162  | 0.313797543  | 0.881481882 | 0.126792252 | 0.8914411 |
| 0.292750808 | 0.326683057  | 0.205025676 | 1           | 0.8914411 |
| 0.292750808 | 0.326683057  | 0.205025676 | 1           | 0.8914411 |
| 0.292956599 | 0.262051298  | 0.412603306 | 0.02341474  | 0.8914411 |
| 0.293147283 | 0.193872178  | 0.001207877 | 0.052574033 | 0.8914411 |
| 0.293267013 | -0.178258159 | 0.035148121 | 0.000324671 | 0.8914411 |
| 0.293663452 | -0.182084411 | 0.043105813 | 0.000596242 | 0.8914411 |
| 0.293663452 | -0.182084411 | 0.043105813 | 0.000596242 | 0.8914411 |
| 0.293722717 | -0.237671412 | 0.205025676 | 0.006372161 | 0.8914411 |
| 0.293968851 | 0.296523652  | 0.075374611 | 0.704162183 | 0.8914411 |
| 0.294387817 | 0.353625914  | 1           | 0.704162183 | 0.8914411 |
| 0.294408259 | -0.320294959 | 1           | 0.145037597 | 0.8914411 |
| 0.294442438 | 0.345170523  | 0.439859057 | 1           | 0.8914411 |
| 0.294722965 | 0.181303591  | 0.0008771   | 0.029310175 | 0.8914411 |
| 0.295198606 | 0.202607583  | 0.087427713 | 0.001791344 | 0.8914411 |
| 0.295198606 | 0.202607583  | 0.087427713 | 0.001791344 | 0.8914411 |
| 0.295227302 | -0.325587274 | 1           | 0.164911511 | 0.8914411 |
| 0.295227302 | -0.325587274 | 1           | 0.164911511 | 0.8914411 |
| 0.295291202 | 0.347204986  | 1           | 0.489952655 | 0.8914411 |
| 0.29555025  | 0.340849411  | 1           | 0.364167203 | 0.8914411 |
| 0.295988553 | 0.285018181  | 0.584854032 | 0.042826979 | 0.8914411 |
| 0.295988553 | 0.285018181  | 0.584854032 | 0.042826979 | 0.8914411 |
| 0.296064418 | -0.261490861 | 0.412603306 | 0.02341474  | 0.8914411 |
| 0.29624054  | -0.142274074 | 0.009746439 | 4.69E-05    | 0.8914411 |
| 0.296258245 | 0.352748787  | 0.684045313 | 1           | 0.8914411 |
| 0.296266866 | 0.312924248  | 0.169239932 | 1           | 0.8914411 |
| 0.296530238 | 0.197347362  | 0.075374611 | 0.001090387 | 0.8914411 |
| 0.296604407 | -0.352754671 | 1           | 0.704162183 | 0.8914411 |
| 0.296604407 | -0.352754671 | 1           | 0.704162183 | 0.8914411 |
| 0.296834424 | 0.319277015  | 0.19926681  | 1           | 0.8914411 |
| 0.296873202 | 0.077396492  | 4.10E-07    | 4.69E-05    | 0.8914411 |
| 0.296952007 | 0.323834922  | 0.205025676 | 1           | 0.8914411 |
| 0.297128477 | -0.352122931 | 0.691111318 | 1           | 0.8914411 |
| 0.29724537  | -0.348244705 | 0.584854032 | 1           | 0.8914411 |
| 0.29724537  | -0.348244705 | 0.584854032 | 1           | 0.8914411 |
| 0.297438737 | -0.161506566 | 0.025193624 | 0.000163543 | 0.8914411 |
| 0.297586923 | -0.353357382 | 1           | 0.850173656 | 0.8914411 |
| 0.297586923 | -0.353357382 | 1           | 0.850173656 | 0.8914411 |
| 0.297591335 | -0.34704382  | 0.439859057 | 1           | 0.8914411 |
| 0.297591335 | -0.34704382  | 0.439859057 | 1           | 0.8914411 |
| 0.297697035 | -0.353433703 | 0.88322726  | 1           | 0.8914411 |
| 0.297697035 | -0.353433703 | 0.88322726  | 1           | 0.8914411 |
| 0.298406678 | 0.304661327  | 0.104319013 | 0.704162183 | 0.8914411 |
| 0.298406678 | 0.304661327  | 0.104319013 | 0.704162183 | 0.8914411 |
| 0.298440113 | -0.262279117 | 0.412603306 | 0.02341474  | 0.8914411 |
| 0.29894914  | -0.340948901 | 1           | 0.397942841 | 0.8914411 |
| 0.29894914  | -0.340948901 | 1           | 0.397942841 | 0.8914411 |
| 0.299041879 | 0.224133964  | 0.192696374 | 0.003736177 | 0.8914411 |
| 0.299041879 | 0.224133964  | 0.192696374 | 0.003736177 | 0.8914411 |
| 0.299302341 | -0.288803543 | 0.075374611 | 0.601859652 | 0.8914411 |
| 0.299413568 | 0.291661781  | 0.584854032 | 0.060775899 | 0.8914411 |
| 0.299514764 | 0.151616067  | 0.000245628 | 0.009270366 | 0.8914411 |
| 0.299514764 | 0.151616067  | 0.000245628 | 0.009270366 | 0.8914411 |
| 0.2996003   | -0.265530063 | 0.439859057 | 0.025431136 | 0.8914411 |
| 0.2996003   | -0.265530063 | 0.439859057 | 0.025431136 | 0.8914411 |
| 0.300428896 | 0.347229864  | 1           | 0.489952655 | 0.8914411 |
| 0.300602189 | 0.055828787  | 4.36E-08    | 3.66E-06    | 0.8914411 |
| 0.300602189 | 0.055828787  | 4.36E-08    | 3.66E-06    | 0.8914411 |

|             |              |             |             |           |
|-------------|--------------|-------------|-------------|-----------|
| 0.300624355 | 0.328489303  | 1           | 0.242167012 | 0.8914411 |
| 0.300777425 | -0.343366107 | 1           | 0.489952655 | 0.8914411 |
| 0.301016871 | 0.294019023  | 0.087427713 | 0.704162183 | 0.8914411 |
| 0.301016871 | 0.294019023  | 0.087427713 | 0.704162183 | 0.8914411 |
| 0.301016871 | 0.294019023  | 0.087427713 | 0.704162183 | 0.8914411 |
| 0.301251402 | 0.346196534  | 0.584854032 | 1           | 0.8914411 |
| 0.301251402 | 0.346196534  | 0.584854032 | 1           | 0.8914411 |
| 0.301292496 | 0.171155709  | 0.0008771   | 0.025431136 | 0.8914411 |
| 0.301299669 | 0.25989608   | 0.412603306 | 0.02341474  | 0.8914411 |
| 0.30163586  | 0.341801363  | 1           | 0.416730107 | 0.8914411 |
| 0.30163586  | 0.341801363  | 1           | 0.416730107 | 0.8914411 |
| 0.301744612 | -0.345672092 | 1           | 0.489952655 | 0.8914411 |
| 0.301744612 | -0.345672092 | 1           | 0.489952655 | 0.8914411 |
| 0.302069845 | 0.210317608  | 0.104319013 | 0.002420613 | 0.8914411 |
| 0.302480671 | -0.347217129 | 1           | 0.645935818 | 0.8914411 |
| 0.302567266 | 0.287232782  | 0.584854032 | 0.060775899 | 0.8914411 |
| 0.302567266 | 0.287232782  | 0.584854032 | 0.060775899 | 0.8914411 |
| 0.302567266 | 0.287232782  | 0.584854032 | 0.060775899 | 0.8914411 |
| 0.302567266 | 0.287232782  | 0.584854032 | 0.060775899 | 0.8914411 |
| 0.302567266 | 0.287232782  | 0.584854032 | 0.060775899 | 0.8914411 |
| 0.302567266 | 0.287232782  | 0.584854032 | 0.060775899 | 0.8914411 |
| 0.302567266 | 0.287232782  | 0.584854032 | 0.060775899 | 0.8914411 |
| 0.302988421 | 0.343485525  | 1           | 0.489952655 | 0.8914411 |
| 0.303001368 | 0.169067106  | 0.034012327 | 0.000324671 | 0.8914411 |
| 0.303001368 | 0.169067106  | 0.034012327 | 0.000324671 | 0.8914411 |
| 0.30303855  | 0.159302764  | 0.000261772 | 0.011906673 | 0.8914411 |
| 0.30303855  | 0.159302764  | 0.000261772 | 0.011906673 | 0.8914411 |
| 0.303094717 | 0.346683554  | 1           | 0.645935818 | 0.8914411 |
| 0.303470701 | 0.280429229  | 0.584854032 | 0.042826979 | 0.8914411 |
| 0.304037515 | -0.198935115 | 0.087427713 | 0.001791344 | 0.8914411 |
| 0.304196164 | -0.277314548 | 0.043105813 | 0.489952655 | 0.8914411 |
| 0.304333965 | -0.241280271 | 0.307400178 | 0.009270366 | 0.8914411 |
| 0.304681567 | -0.326696058 | 1           | 0.242167012 | 0.8914411 |
| 0.304709009 | -0.326617232 | 1           | 0.242167012 | 0.8914411 |
| 0.304713777 | -0.090214457 | 0.000261772 | 8.55E-07    | 0.8914411 |
| 0.305009086 | 0.098410698  | 4.58E-06    | 0.000324671 | 0.8914411 |
| 0.305064753 | -0.237482105 | 0.295435331 | 0.009270366 | 0.8914411 |
| 0.305075326 | 0.323844875  | 0.307400178 | 1           | 0.8914411 |
| 0.30513768  | 0.325514786  | 1           | 0.242167012 | 0.8914411 |
| 0.305270321 | -0.346902269 | 0.737584497 | 1           | 0.8914411 |
| 0.305270321 | -0.346902269 | 0.737584497 | 1           | 0.8914411 |
| 0.305322877 | -0.054760156 | 5.98E-06    | 4.93E-08    | 0.8914411 |
| 0.305322877 | -0.054760156 | 5.98E-06    | 4.93E-08    | 0.8914411 |
| 0.305350006 | 0.086872337  | 1.23E-06    | 0.000124759 | 0.8914411 |
| 0.305350006 | 0.086872337  | 1.23E-06    | 0.000124759 | 0.8914411 |
| 0.305415097 | 0.344862611  | 1           | 0.601859652 | 0.8914411 |
| 0.30552695  | 0.20177949   | 0.095006685 | 0.002093839 | 0.8914411 |
| 0.305724002 | 0.293235453  | 0.095538718 | 0.704162183 | 0.8914411 |
| 0.305769626 | 0.347541948  | 0.881481882 | 1           | 0.8914411 |
| 0.305801865 | 0.265969059  | 0.439859057 | 0.025431136 | 0.8914411 |
| 0.305828884 | 0.301099853  | 0.737584497 | 0.085309726 | 0.8914411 |
| 0.305928863 | -0.20886246  | 0.104319013 | 0.002420613 | 0.8914411 |
| 0.306299843 | -0.342116698 | 0.584854032 | 1           | 0.8914411 |
| 0.306321574 | 0.346858637  | 1           | 0.850173656 | 0.8914411 |
| 0.306321574 | 0.346858637  | 1           | 0.850173656 | 0.8914411 |
| 0.306341023 | 0.274365236  | 0.439859057 | 0.031639242 | 0.8914411 |
| 0.306341023 | 0.274365236  | 0.439859057 | 0.031639242 | 0.8914411 |
| 0.306681416 | 0.2575059    | 0.412603306 | 0.02341474  | 0.8914411 |
| 0.306842898 | 0.292904224  | 0.691111318 | 0.066020955 | 0.8914411 |
| 0.306842898 | 0.292904224  | 0.691111318 | 0.066020955 | 0.8914411 |
| 0.306842898 | 0.292904224  | 0.691111318 | 0.066020955 | 0.8914411 |
| 0.307203346 | 0.151688108  | 0.000249829 | 0.009270366 | 0.8914411 |
| 0.307203346 | 0.151688108  | 0.000249829 | 0.009270366 | 0.8914411 |
| 0.307310105 | 0.344293957  | 1           | 0.704162183 | 0.8914411 |
| 0.307461864 | 0.332759199  | 0.412603306 | 1           | 0.8914411 |

|             |              |             |             |           |
|-------------|--------------|-------------|-------------|-----------|
| 0.307461864 | 0.332759199  | 0.412603306 | 1           | 0.8914411 |
| 0.307461864 | 0.332759199  | 0.412603306 | 1           | 0.8914411 |
| 0.307461864 | 0.332759199  | 0.412603306 | 1           | 0.8914411 |
| 0.307595323 | 0.286963657  | 0.584854032 | 0.060775899 | 0.8914411 |
| 0.307595323 | 0.286963657  | 0.584854032 | 0.060775899 | 0.8914411 |
| 0.308082005 | 0.253146091  | 0.030989574 | 0.242167012 | 0.8914411 |
| 0.308117993 | -0.296217226 | 0.737584497 | 0.085309726 | 0.8914411 |
| 0.308133351 | 0.097997989  | 4.58E-06    | 0.000324671 | 0.8914411 |
| 0.308347657 | -0.248328125 | 0.412603306 | 0.011906673 | 0.8914411 |
| 0.308520895 | -0.335392117 | 1           | 0.416730107 | 0.8914411 |
| 0.308852385 | 0.324047778  | 0.34036444  | 1           | 0.8914411 |
| 0.308859437 | -0.320682882 | 0.307400178 | 1           | 0.8914411 |
| 0.308859437 | -0.320682882 | 0.307400178 | 1           | 0.8914411 |
| 0.309011348 | 0.209412439  | 0.104319013 | 0.002420613 | 0.8914411 |
| 0.309100067 | -0.298702018 | 0.737584497 | 0.085309726 | 0.8914411 |
| 0.309100067 | -0.298702018 | 0.737584497 | 0.085309726 | 0.8914411 |
| 0.309117091 | -0.058261219 | 1.22E-05    | 5.53E-08    | 0.8914411 |
| 0.309117091 | -0.058261219 | 1.22E-05    | 5.53E-08    | 0.8914411 |
| 0.309135415 | 0.28155748   | 0.075374611 | 0.489952655 | 0.8914411 |
| 0.309530802 | 0.066859156  | 1.48E-07    | 1.65E-05    | 0.8914411 |
| 0.309530802 | 0.066859156  | 1.48E-07    | 1.65E-05    | 0.8914411 |
| 0.309703628 | 0.344830179  | 0.881481882 | 1           | 0.8914411 |
| 0.310080038 | 0.317086788  | 0.295435331 | 1           | 0.8914411 |
| 0.31028157  | -0.335411384 | 1           | 0.416730107 | 0.8914411 |
| 0.310357785 | -0.341148915 | 1           | 0.601859652 | 0.8914411 |
| 0.310620352 | 0.251613164  | 0.030989574 | 0.242167012 | 0.8914411 |
| 0.310620352 | 0.251613164  | 0.030989574 | 0.242167012 | 0.8914411 |
| 0.310620352 | 0.251613164  | 0.030989574 | 0.242167012 | 0.8914411 |
| 0.310677349 | 0.158233629  | 0.025193624 | 0.00028972  | 0.8914411 |
| 0.310812494 | 0.049340629  | 2.61E-08    | 3.06E-06    | 0.8914411 |
| 0.310812494 | 0.049340629  | 2.61E-08    | 3.06E-06    | 0.8914411 |
| 0.311293775 | -0.326114183 | 1           | 0.242167012 | 0.8914411 |
| 0.311401392 | -0.333418854 | 1           | 0.416730107 | 0.8914411 |
| 0.311596278 | -0.27529341  | 0.493333254 | 0.045751002 | 0.8914411 |
| 0.311600331 | -0.343275821 | 0.737584497 | 1           | 0.8914411 |
| 0.311675393 | 0.12470581   | 6.77E-05    | 0.002420613 | 0.8914411 |
| 0.311675393 | 0.12470581   | 6.77E-05    | 0.002420613 | 0.8914411 |
| 0.311675393 | 0.12470581   | 6.77E-05    | 0.002420613 | 0.8914411 |
| 0.311675393 | 0.12470581   | 6.77E-05    | 0.002420613 | 0.8914411 |
| 0.311920071 | -0.136117574 | 0.00974133  | 4.69E-05    | 0.8914411 |
| 0.311945005 | -0.337999885 | 1           | 0.489952655 | 0.8914411 |
| 0.312041118 | -0.343129731 | 0.881481882 | 1           | 0.8914411 |
| 0.312090309 | 0.126457096  | 6.77E-05    | 0.002420613 | 0.8914411 |
| 0.312358996 | 0.330208088  | 0.439859057 | 1           | 0.8914411 |
| 0.312373299 | -0.173779016 | 0.035148121 | 0.000596242 | 0.8914411 |
| 0.312373299 | -0.173779016 | 0.035148121 | 0.000596242 | 0.8914411 |
| 0.312639266 | -0.258477428 | 0.412603306 | 0.025431136 | 0.8914411 |
| 0.312639266 | -0.258477428 | 0.412603306 | 0.025431136 | 0.8914411 |
| 0.312731555 | 0.334231907  | 1           | 0.489952655 | 0.8914411 |
| 0.31292158  | 0.326928501  | 0.412603306 | 1           | 0.8914411 |
| 0.31292158  | 0.326928501  | 0.412603306 | 1           | 0.8914411 |
| 0.313176884 | 0.333549217  | 1           | 0.416730107 | 0.8914411 |
| 0.313192598 | 0.336490487  | 1           | 0.489952655 | 0.8914411 |
| 0.314038045 | -0.341203903 | 1           | 0.704162183 | 0.8914411 |
| 0.314207702 | -0.295419602 | 0.134257478 | 0.704162183 | 0.8914411 |
| 0.314220559 | 0.069691153  | 3.18E-07    | 4.35E-05    | 0.8914411 |
| 0.314220559 | 0.069691153  | 3.18E-07    | 4.35E-05    | 0.8914411 |
| 0.314432045 | 0.21670373   | 0.169239932 | 0.004171959 | 0.8914411 |
| 0.314778054 | -0.305317832 | 0.989933981 | 0.145037597 | 0.8914411 |
| 0.315308087 | -0.208716701 | 0.004526275 | 0.085309726 | 0.8914411 |
| 0.315378934 | 0.295036902  | 0.134257478 | 0.704162183 | 0.8914411 |
| 0.315387073 | 0.302718466  | 0.88322726  | 0.129712192 | 0.8914411 |
| 0.315387073 | 0.302718466  | 0.88322726  | 0.129712192 | 0.8914411 |
| 0.31567258  | -0.324934427 | 1           | 0.364167203 | 0.8914411 |

|             |              |             |             |             |
|-------------|--------------|-------------|-------------|-------------|
| 0.31567258  | -0.324934427 | 1           | 0.364167203 | 0.8914411   |
| 0.315722826 | -0.339935481 | 1           | 0.704162183 | 0.8914411   |
| 0.315722826 | -0.339935481 | 1           | 0.704162183 | 0.8914411   |
| 0.315785011 | -0.113971509 | 0.001207877 | 1.04E-05    | 0.8914411   |
| 0.315785011 | -0.113971509 | 0.001207877 | 1.04E-05    | 0.8914411   |
| 0.316007485 | -0.295918065 | 0.169239932 | 0.704162183 | 0.8914411   |
| 0.316007485 | -0.295918065 | 0.169239932 | 0.704162183 | 0.8914411   |
| 0.316053888 | 0.337901857  | 1           | 0.645935818 | 0.8914411   |
| 0.316053888 | 0.337901857  | 1           | 0.645935818 | 0.8914411   |
| 0.316130816 | 0.088023645  | 3.58E-06    | 0.000140627 | 0.8914411   |
| 0.316421756 | 0.316684709  | 0.307400178 | 1           | 0.8914411   |
| 0.316421756 | 0.316684709  | 0.307400178 | 1           | 0.8914411   |
| 0.316421756 | 0.316684709  | 0.307400178 | 1           | 0.8914411   |
| 0.316491696 | 0.324216211  | 0.412603306 | 1           | 0.8914411   |
| 0.316610938 | 0.331942742  | 0.439859057 | 1           | 0.8914411   |
| 0.316610938 | 0.331942742  | 0.439859057 | 1           | 0.8914411   |
| 0.316819622 | 0.297717964  | 0.881481882 | 0.126792252 | 0.8914411   |
| 0.316835151 | -0.168576091 | 0.0008771   | 0.025431136 | 0.8914411   |
| 0.316906354 | 0.339196149  | 0.737584497 | 1           | 0.8914411   |
| 0.316922837 | -0.13224401  | 0.008580492 | 4.69E-05    | 0.8914411   |
| 0.317024907 | 0.081054973  | 1.23E-06    | 0.000115129 | 0.8914411   |
| 0.317230142 | 0.27543469   | 0.584854032 | 0.053084396 | 0.8914411   |
| 0.317234226 | -0.284538246 | 0.095006685 | 0.645935818 | 0.940898014 |
| 0.317234226 | -0.284538246 | 0.095006685 | 0.645935818 | 0.940898014 |
| 0.317234226 | -0.284538246 | 0.095006685 | 0.645935818 | 0.940898014 |
| 0.317234226 | -0.284538246 | 0.095006685 | 0.645935818 | 0.940898014 |
| 0.317758941 | -0.323071493 | 0.412603306 | 1           | 0.940898014 |
| 0.317758941 | -0.323071493 | 0.412603306 | 1           | 0.940898014 |
| 0.317905476 | 0.240322177  | 0.025193624 | 0.242167012 | 0.940898014 |
| 0.317905476 | 0.240322177  | 0.025193624 | 0.242167012 | 0.940898014 |
| 0.318833309 | 0.298979659  | 0.169239932 | 1           | 0.940898014 |
| 0.319325418 | 0.338170305  | 1           | 1           | 0.940898014 |
| 0.319325418 | 0.338170305  | 1           | 1           | 0.940898014 |
| 0.31935715  | -0.055886752 | 1.22E-05    | 5.53E-08    | 0.940898014 |
| 0.319512966 | -0.323599431 | 0.412603306 | 1           | 0.940898014 |
| 0.319686583 | -0.335511604 | 0.584854032 | 1           | 0.940898014 |
| 0.319686583 | -0.335511604 | 0.584854032 | 1           | 0.940898014 |
| 0.319893362 | 0.334276086  | 1           | 0.601859652 | 0.940898014 |
| 0.319893362 | 0.334276086  | 1           | 0.601859652 | 0.940898014 |
| 0.319954392 | -0.327816952 | 0.439859057 | 1           | 0.940898014 |
| 0.319954392 | -0.327816952 | 0.439859057 | 1           | 0.940898014 |
| 0.319954392 | -0.327816952 | 0.439859057 | 1           | 0.940898014 |
| 0.319954392 | -0.327816952 | 0.439859057 | 1           | 0.940898014 |
| 0.320176856 | 0.193284041  | 0.075374611 | 0.001791344 | 0.940898014 |
| 0.320176856 | 0.193284041  | 0.075374611 | 0.001791344 | 0.940898014 |
| 0.320176856 | 0.193284041  | 0.075374611 | 0.001791344 | 0.940898014 |
| 0.320234418 | -0.320288059 | 1           | 0.305102445 | 0.946960882 |
| 0.320852871 | 0.275509442  | 0.584854032 | 0.060775899 | 0.946960882 |
| 0.320930359 | 0.149068486  | 0.000261772 | 0.009270366 | 0.946960882 |
| 0.321929398 | 0.33648511   | 0.989933981 | 1           | 0.946960882 |
| 0.322233326 | 0.306050842  | 1           | 0.145037597 | 0.946960882 |
| 0.322740721 | 0.262754664  | 0.043105813 | 0.416730107 | 0.946960882 |
| 0.322810155 | -0.090070671 | 0.000467492 | 3.06E-06    | 0.946960882 |
| 0.322931273 | -0.318273872 | 1           | 0.272770942 | 0.946960882 |
| 0.32300063  | 0.2235804    | 0.205025676 | 0.006372161 | 0.946960882 |
| 0.32300063  | 0.2235804    | 0.205025676 | 0.006372161 | 0.946960882 |
| 0.323129487 | 0.199443604  | 0.004273917 | 0.085309726 | 0.946960882 |
| 0.323129487 | 0.199443604  | 0.004273917 | 0.085309726 | 0.946960882 |
| 0.323518332 | 0.22735004   | 0.205025676 | 0.009270366 | 0.946960882 |
| 0.323518332 | 0.22735004   | 0.205025676 | 0.009270366 | 0.946960882 |
| 0.324040522 | 0.329874344  | 1           | 0.489952655 | 0.946960882 |
| 0.324040522 | 0.329874344  | 1           | 0.489952655 | 0.946960882 |
| 0.324469357 | -0.314428653 | 0.412603306 | 1           | 0.946960882 |
| 0.324817248 | 0.152421329  | 0.000295301 | 0.011906673 | 0.946960882 |

|             |              |             |             |             |
|-------------|--------------|-------------|-------------|-------------|
| 0.325106522 | 0.089084754  | 4.58E-06    | 0.00028972  | 0.946960882 |
| 0.325746853 | -0.283277508 | 0.691111318 | 0.085309726 | 0.946960882 |
| 0.325746853 | -0.283277508 | 0.691111318 | 0.085309726 | 0.946960882 |
| 0.325807107 | -0.333747582 | 0.881481882 | 1           | 0.946960882 |
| 0.325878545 | 0.321607655  | 1           | 0.397942841 | 0.946960882 |
| 0.325878545 | 0.321607655  | 1           | 0.397942841 | 0.946960882 |
| 0.325950932 | 0.329260975  | 0.584854032 | 1           | 0.946960882 |
| 0.326082256 | 0.32464285   | 1           | 0.489952655 | 0.946960882 |
| 0.326685156 | 0.035548516  | 6.38E-09    | 2.98E-07    | 0.946960882 |
| 0.326685156 | 0.035548516  | 6.38E-09    | 2.98E-07    | 0.946960882 |
| 0.326695857 | 0.333254879  | 0.989933981 | 1           | 0.946960882 |
| 0.326726389 | 0.32697729   | 1           | 0.489952655 | 0.946960882 |
| 0.326726389 | 0.32697729   | 1           | 0.489952655 | 0.946960882 |
| 0.32678957  | -0.158830144 | 0.030989574 | 0.0002997   | 0.946960882 |
| 0.32678957  | -0.158830144 | 0.030989574 | 0.0002997   | 0.946960882 |
| 0.32710361  | 0.183357168  | 0.001207877 | 0.052574033 | 0.946960882 |
| 0.327126618 | -0.324702305 | 0.439859057 | 1           | 0.946960882 |
| 0.327175962 | -0.330326471 | 1           | 0.704162183 | 0.946960882 |
| 0.327175962 | -0.330326471 | 1           | 0.704162183 | 0.946960882 |
| 0.327357775 | 0.15516635   | 0.000467492 | 0.011906673 | 0.946960882 |
| 0.327634932 | 0.261570808  | 0.043105813 | 0.416730107 | 0.946960882 |
| 0.327650732 | -0.094975508 | 0.0008771   | 3.66E-06    | 0.946960882 |
| 0.327650732 | -0.094975508 | 0.0008771   | 3.66E-06    | 0.946960882 |
| 0.327719681 | -0.277217285 | 0.584854032 | 0.061934943 | 0.946960882 |
| 0.328063254 | -0.331649088 | 1           | 0.704162183 | 0.946960882 |
| 0.328131913 | 0.09478584   | 5.98E-06    | 0.000324671 | 0.946960882 |
| 0.328131913 | 0.09478584   | 5.98E-06    | 0.000324671 | 0.946960882 |
| 0.328131913 | 0.09478584   | 5.98E-06    | 0.000324671 | 0.946960882 |
| 0.32878622  | -0.130241074 | 0.008580492 | 4.69E-05    | 0.946960882 |
| 0.328830605 | 0.132215908  | 8.53E-05    | 0.004171959 | 0.946960882 |
| 0.328830605 | 0.132215908  | 8.53E-05    | 0.004171959 | 0.946960882 |
| 0.328830605 | 0.132215908  | 8.53E-05    | 0.004171959 | 0.946960882 |
| 0.328830605 | 0.132215908  | 8.53E-05    | 0.004171959 | 0.946960882 |
| 0.328857485 | -0.120015303 | 0.004273917 | 4.35E-05    | 0.946960882 |
| 0.329230899 | 0.275193724  | 0.087427713 | 0.601859652 | 0.946960882 |
| 0.329230899 | 0.275193724  | 0.087427713 | 0.601859652 | 0.946960882 |
| 0.329286335 | -0.116828047 | 0.003169634 | 1.80E-05    | 0.946960882 |
| 0.329286335 | -0.116828047 | 0.003169634 | 1.80E-05    | 0.946960882 |
| 0.329286335 | -0.116828047 | 0.003169634 | 1.80E-05    | 0.946960882 |
| 0.330229354 | 0.307644289  | 1           | 0.242167012 | 0.946960882 |
| 0.330233268 | 0.179074658  | 0.043105813 | 0.001090387 | 0.946960882 |
| 0.330351925 | -0.146769938 | 0.018394332 | 0.000124759 | 0.946960882 |
| 0.330351925 | -0.146769938 | 0.018394332 | 0.000124759 | 0.946960882 |
| 0.330351925 | -0.146769938 | 0.018394332 | 0.000124759 | 0.946960882 |
| 0.330351925 | -0.146769938 | 0.018394332 | 0.000124759 | 0.946960882 |
| 0.330483493 | 0.312603431  | 0.412603306 | 1           | 0.946960882 |
| 0.330483493 | 0.312603431  | 0.412603306 | 1           | 0.946960882 |
| 0.330483493 | 0.312603431  | 0.412603306 | 1           | 0.946960882 |
| 0.330483493 | 0.312603431  | 0.412603306 | 1           | 0.946960882 |
| 0.330483493 | 0.312603431  | 0.412603306 | 1           | 0.946960882 |
| 0.330483493 | 0.312603431  | 0.412603306 | 1           | 0.946960882 |
| 0.330682989 | 0.325878788  | 1           | 0.489952655 | 0.946960882 |
| 0.330843572 | -0.144509582 | 0.018163994 | 0.000124759 | 0.946960882 |
| 0.330843572 | -0.144509582 | 0.018163994 | 0.000124759 | 0.946960882 |
| 0.33100205  | 0.257066833  | 0.439859057 | 0.031639242 | 0.946960882 |
| 0.331119972 | 0.32666939   | 0.584854032 | 1           | 0.946960882 |
| 0.331119972 | 0.32666939   | 0.584854032 | 1           | 0.946960882 |
| 0.33193196  | 0.28612122   | 0.169239932 | 0.704162183 | 0.946960882 |
| 0.33193196  | 0.28612122   | 0.169239932 | 0.704162183 | 0.946960882 |
| 0.332227651 | -0.291075856 | 0.881481882 | 0.126792252 | 0.946960882 |
| 0.332276409 | 0.32656561   | 1           | 0.645935818 | 0.946960882 |
| 0.332276409 | 0.32656561   | 1           | 0.645935818 | 0.946960882 |
| 0.332687211 | 0.106967489  | 1.56E-05    | 0.001090387 | 0.946960882 |
| 0.332772903 | 0.293404617  | 0.989933981 | 0.145037597 | 0.946960882 |



|             |              |             |             |             |
|-------------|--------------|-------------|-------------|-------------|
| 0.332777325 | 0.298655209  | 1           | 0.145037597 | 0.946960882 |
| 0.332777325 | 0.298655209  | 1           | 0.145037597 | 0.946960882 |
| 0.332777325 | 0.298655209  | 1           | 0.145037597 | 0.946960882 |
| 0.332851431 | 0.081441538  | 1.84E-06    | 0.000115129 | 0.946960882 |
| 0.3328595   | 0.327045364  | 0.691111318 | 1           | 0.946960882 |
| 0.33286151  | 0.224846894  | 0.018163994 | 0.164911511 | 0.946960882 |
| 0.332887663 | 0.327233255  | 1           | 0.704162183 | 0.950058752 |
| 0.333244341 | 0.262073277  | 0.439859057 | 0.045751002 | 0.950058752 |
| 0.333244341 | 0.262073277  | 0.439859057 | 0.045751002 | 0.950058752 |
| 0.333438631 | -0.113175939 | 0.002297238 | 1.65E-05    | 0.950058752 |
| 0.333660835 | 0.185756892  | 0.003169634 | 0.060775899 | 0.950058752 |
| 0.334151837 | -0.322998646 | 1           | 0.489952655 | 0.950058752 |
| 0.334151837 | -0.322998646 | 1           | 0.489952655 | 0.950058752 |
| 0.334151837 | -0.322998646 | 1           | 0.489952655 | 0.950058752 |
| 0.334207705 | 0.258541972  | 0.439859057 | 0.041232736 | 0.950058752 |
| 0.334361703 | 0.087373895  | 4.58E-06    | 0.000163543 | 0.950058752 |
| 0.334423113 | 0.164756022  | 0.035148121 | 0.000596242 | 0.950058752 |
| 0.334532957 | -0.327738635 | 0.881481882 | 1           | 0.950058752 |
| 0.335054913 | -0.234961807 | 0.34036444  | 0.017403168 | 0.950058752 |
| 0.335054913 | -0.234961807 | 0.34036444  | 0.017403168 | 0.950058752 |
| 0.335187968 | -0.327358085 | 1           | 0.850173656 | 0.950058752 |
| 0.335187968 | -0.327358085 | 1           | 0.850173656 | 0.950058752 |
| 0.335247646 | 0.252995853  | 0.043105813 | 0.416730107 | 0.950058752 |
| 0.335456557 | -0.271702608 | 0.584854032 | 0.061934943 | 0.950058752 |
| 0.335537751 | -0.326331558 | 1           | 0.704162183 | 0.950058752 |
| 0.335877456 | 0.322898737  | 0.584854032 | 1           | 0.950058752 |
| 0.335924967 | -0.252440594 | 0.439859057 | 0.031639242 | 0.950058752 |
| 0.335924967 | -0.252440594 | 0.439859057 | 0.031639242 | 0.950058752 |
| 0.336061322 | 0.324214877  | 1           | 0.704162183 | 0.953968118 |
| 0.336426014 | 0.160265218  | 0.0008771   | 0.02341474  | 0.953968118 |
| 0.337036331 | -0.32561267  | 0.737584497 | 1           | 0.953968118 |
| 0.337708391 | 0.055432743  | 9.36E-08    | 5.99E-06    | 0.953968118 |
| 0.338117492 | -0.324926444 | 0.737584497 | 1           | 0.953968118 |
| 0.338117492 | -0.324926444 | 0.737584497 | 1           | 0.953968118 |
| 0.33814132  | 0.137678096  | 0.000245628 | 0.006372161 | 0.953968118 |
| 0.338493141 | -0.271199543 | 0.584854032 | 0.066020955 | 0.953968118 |
| 0.338982606 | 0.319946556  | 1           | 0.489952655 | 0.953968118 |
| 0.338982606 | 0.319946556  | 1           | 0.489952655 | 0.953968118 |
| 0.339552279 | 0.281080651  | 0.737584497 | 0.126792252 | 0.953968118 |
| 0.339571017 | 0.159382407  | 0.034012327 | 0.000348916 | 0.953968118 |
| 0.340119261 | -0.323966783 | 0.881481882 | 1           | 0.953968118 |
| 0.340408795 | -0.323009119 | 0.737584497 | 1           | 0.953968118 |
| 0.340712437 | -0.27323164  | 0.095538718 | 0.704162183 | 0.953968118 |
| 0.340884435 | 0.251358007  | 0.439859057 | 0.031639242 | 0.953968118 |
| 0.340884435 | 0.251358007  | 0.439859057 | 0.031639242 | 0.953968118 |
| 0.341052749 | -0.316630961 | 1           | 0.489952655 | 0.953968118 |
| 0.341235427 | -0.20437715  | 0.169239932 | 0.005827837 | 0.953968118 |
| 0.341238361 | 0.321229348  | 0.691111318 | 1           | 0.953968118 |
| 0.341707607 | 0.305334812  | 1           | 0.242167012 | 0.953968118 |
| 0.34174159  | -0.307473847 | 1           | 0.364167203 | 0.953968118 |
| 0.34174159  | -0.307473847 | 1           | 0.364167203 | 0.953968118 |
| 0.342062911 | 0.286999449  | 0.19926681  | 1           | 0.953968118 |
| 0.342403236 | -0.176774835 | 0.043105813 | 0.001791344 | 0.953968118 |
| 0.342403236 | -0.176774835 | 0.043105813 | 0.001791344 | 0.953968118 |
| 0.342403236 | -0.176774835 | 0.043105813 | 0.001791344 | 0.953968118 |
| 0.342403236 | -0.176774835 | 0.043105813 | 0.001791344 | 0.953968118 |
| 0.342527424 | 0.196744208  | 0.104319013 | 0.003736177 | 0.953968118 |
| 0.34303406  | -0.322254665 | 1           | 1           | 0.953968118 |
| 0.343098242 | -0.300388849 | 1           | 0.242167012 | 0.953968118 |
| 0.343634637 | -0.12700292  | 0.008580492 | 6.41E-05    | 0.953968118 |
| 0.343634637 | -0.12700292  | 0.008580492 | 6.41E-05    | 0.953968118 |
| 0.34428273  | 0.312677591  | 0.439859057 | 1           | 0.953968118 |
| 0.344311891 | 0.258976412  | 0.439859057 | 0.053084396 | 0.953968118 |
| 0.344528956 | -0.171395563 | 0.043105813 | 0.001090387 | 0.953968118 |

|             |              |             |             |             |
|-------------|--------------|-------------|-------------|-------------|
| 0.344731378 | 0.270367908  | 0.584854032 | 0.085309726 | 0.953968118 |
| 0.34506302  | -0.227412621 | 0.307400178 | 0.011906673 | 0.953968118 |
| 0.346136437 | 0.219352169  | 0.208605117 | 0.009270366 | 0.953968118 |
| 0.346524953 | 0.312845566  | 1           | 0.489952655 | 0.953968118 |
| 0.346524953 | 0.312845566  | 1           | 0.489952655 | 0.953968118 |
| 0.346689848 | -0.287336957 | 0.989933981 | 0.145037597 | 0.953968118 |
| 0.346754378 | 0.309119783  | 0.439859057 | 1           | 0.953968118 |
| 0.346812208 | -0.225061308 | 0.025193624 | 0.242167012 | 0.953968118 |
| 0.346878694 | 0.191678469  | 0.095538718 | 0.002420613 | 0.953968118 |
| 0.346895633 | -0.313454633 | 1           | 0.489952655 | 0.953968118 |
| 0.346948312 | 0.317778981  | 0.737584497 | 1           | 0.953968118 |
| 0.346963046 | 0.208183416  | 0.192696374 | 0.006372161 | 0.953968118 |
| 0.347079845 | 0.03887099   | 7.89E-09    | 5.53E-07    | 0.953968118 |
| 0.347129349 | -0.311550059 | 1           | 0.489952655 | 0.953968118 |
| 0.347264098 | -0.163518437 | 0.035148121 | 0.000997588 | 0.953968118 |
| 0.347270624 | 0.315676266  | 1           | 0.601859652 | 0.953968118 |
| 0.347270624 | 0.315676266  | 1           | 0.601859652 | 0.953968118 |
| 0.347270624 | 0.315676266  | 1           | 0.601859652 | 0.953968118 |
| 0.347772626 | -0.107214053 | 0.001207877 | 1.65E-05    | 0.953968118 |
| 0.347772626 | -0.107214053 | 0.001207877 | 1.65E-05    | 0.953968118 |
| 0.347772626 | -0.107214053 | 0.001207877 | 1.65E-05    | 0.953968118 |
| 0.347848535 | 0.265658662  | 0.584854032 | 0.066020955 | 0.953968118 |
| 0.347940853 | 0.188091833  | 0.004273917 | 0.061934943 | 0.953968118 |
| 0.348082761 | -0.318437973 | 0.737584497 | 1           | 0.953968118 |
| 0.348088932 | 0.262718234  | 0.584854032 | 0.060775899 | 0.953968118 |
| 0.348475056 | 0.16548438   | 0.001207877 | 0.029310175 | 0.953968118 |
| 0.348475056 | 0.16548438   | 0.001207877 | 0.029310175 | 0.953968118 |
| 0.34862051  | -0.214022029 | 0.205025676 | 0.009270366 | 0.953968118 |
| 0.34862051  | -0.214022029 | 0.205025676 | 0.009270366 | 0.953968118 |
| 0.348837661 | 0.209829462  | 0.19926681  | 0.006372161 | 0.953968118 |
| 0.348837661 | 0.209829462  | 0.19926681  | 0.006372161 | 0.953968118 |
| 0.348837661 | 0.209829462  | 0.19926681  | 0.006372161 | 0.953968118 |
| 0.348948821 | -0.315152412 | 1           | 0.645935818 | 0.953968118 |
| 0.349247482 | -0.31685293  | 1           | 0.704162183 | 0.953968118 |
| 0.349332744 | -0.243720776 | 0.439859057 | 0.031639242 | 0.953968118 |
| 0.349641113 | 0.278455439  | 0.737584497 | 0.126792252 | 0.953968118 |
| 0.350026152 | -0.210770507 | 0.19926681  | 0.006372161 | 0.953968118 |
| 0.350380339 | 0.313005275  | 1           | 0.601859652 | 0.953968118 |
| 0.350836731 | -0.274359151 | 0.737584497 | 0.126792252 | 0.953968118 |
| 0.350847448 | -0.296778194 | 1           | 0.242167012 | 0.953968118 |
| 0.350943253 | 0.295164274  | 0.34036444  | 1           | 0.953968118 |
| 0.350943253 | 0.295164274  | 0.34036444  | 1           | 0.953968118 |
| 0.350968259 | 0.276608859  | 0.169239932 | 0.704162183 | 0.953968118 |
| 0.350968259 | 0.276608859  | 0.169239932 | 0.704162183 | 0.953968118 |
| 0.351406472 | 0.110382028  | 6.19E-05    | 0.001791344 | 0.953968118 |
| 0.351413594 | 0.284320003  | 0.989933981 | 0.145037597 | 0.953968118 |
| 0.35201121  | -0.301782918 | 1           | 0.364167203 | 0.953968118 |
| 0.35201121  | -0.301782918 | 1           | 0.364167203 | 0.953968118 |
| 0.352077482 | -0.311558103 | 0.584854032 | 1           | 0.953968118 |
| 0.352077482 | -0.311558103 | 0.584854032 | 1           | 0.953968118 |
| 0.352176069 | 0.058552788  | 1.10E-07    | 9.47E-06    | 0.953968118 |
| 0.352365002 | 0.305279335  | 0.439859057 | 1           | 0.953968118 |
| 0.352365002 | 0.305279335  | 0.439859057 | 1           | 0.953968118 |
| 0.352365002 | 0.305279335  | 0.439859057 | 1           | 0.953968118 |
| 0.352365002 | 0.305279335  | 0.439859057 | 1           | 0.953968118 |
| 0.352459192 | 0.312150424  | 0.584854032 | 1           | 0.953968118 |
| 0.352459192 | 0.312150424  | 0.584854032 | 1           | 0.953968118 |
| 0.352532677 | 0.17708733   | 0.002810027 | 0.052574033 | 0.953968118 |
| 0.35258432  | -0.240845769 | 0.412603306 | 0.029310175 | 0.953968118 |
| 0.352711228 | 0.165814833  | 0.043105813 | 0.000997588 | 0.953968118 |
| 0.353026827 | 0.107311427  | 6.19E-05    | 0.001791344 | 0.953968118 |
| 0.353062641 | -0.168140125 | 0.043105813 | 0.001090387 | 0.953968118 |
| 0.353062641 | -0.168140125 | 0.043105813 | 0.001090387 | 0.953968118 |
| 0.353114077 | 0.310024409  | 0.584854032 | 1           | 0.953968118 |

|             |              |             |             |             |
|-------------|--------------|-------------|-------------|-------------|
| 0.353559125 | 0.304880407  | 0.439859057 | 1           | 0.953968118 |
| 0.353559125 | 0.304880407  | 0.439859057 | 1           | 0.953968118 |
| 0.3541334   | 0.15556134   | 0.0008771   | 0.02341474  | 0.953968118 |
| 0.3541334   | 0.15556134   | 0.0008771   | 0.02341474  | 0.953968118 |
| 0.354364412 | 0.29056776   | 0.307400178 | 1           | 0.953968118 |
| 0.354364412 | 0.29056776   | 0.307400178 | 1           | 0.953968118 |
| 0.354388137 | -0.087455725 | 0.000467492 | 3.16E-06    | 0.953968118 |
| 0.354388137 | -0.087455725 | 0.000467492 | 3.16E-06    | 0.953968118 |
| 0.354583214 | 0.247600017  | 0.043105813 | 0.416730107 | 0.953968118 |
| 0.354588071 | 0.213269597  | 0.205025676 | 0.009270366 | 0.953968118 |
| 0.354723989 | 0.30101416   | 0.439859057 | 1           | 0.953968118 |
| 0.355068263 | 0.298388012  | 1           | 0.364167203 | 0.953968118 |
| 0.355198539 | -0.113914881 | 0.004273917 | 4.69E-05    | 0.953968118 |
| 0.355198539 | -0.113914881 | 0.004273917 | 4.69E-05    | 0.953968118 |
| 0.355198539 | -0.113914881 | 0.004273917 | 4.69E-05    | 0.953968118 |
| 0.355198539 | -0.113914881 | 0.004273917 | 4.69E-05    | 0.953968118 |
| 0.355214768 | -0.312282467 | 1           | 0.704162183 | 0.953968118 |
| 0.355214768 | -0.312282467 | 1           | 0.704162183 | 0.953968118 |
| 0.355214768 | -0.312282467 | 1           | 0.704162183 | 0.953968118 |
| 0.355377202 | -0.311713771 | 1           | 0.704162183 | 0.953968118 |
| 0.355416178 | 0.261421905  | 0.584854032 | 0.066020955 | 0.953968118 |
| 0.355760556 | 0.313418437  | 0.737584497 | 1           | 0.953968118 |
| 0.356265535 | 0.234215567  | 0.412603306 | 0.025431136 | 0.953968118 |
| 0.356543875 | 0.151506965  | 0.030989574 | 0.000324671 | 0.953968118 |
| 0.356543875 | 0.151506965  | 0.030989574 | 0.000324671 | 0.953968118 |
| 0.356543875 | 0.151506965  | 0.030989574 | 0.000324671 | 0.953968118 |
| 0.356543875 | 0.151506965  | 0.030989574 | 0.000324671 | 0.953968118 |
| 0.356600328 | 0.17328856   | 0.002297238 | 0.045751002 | 0.953968118 |
| 0.35669101  | 0.240013098  | 0.439859057 | 0.031639242 | 0.953968118 |
| 0.35669101  | 0.240013098  | 0.439859057 | 0.031639242 | 0.953968118 |
| 0.356708001 | -0.132342186 | 0.010835964 | 0.000115129 | 0.953968118 |
| 0.356863627 | -0.193623585 | 0.104319013 | 0.003736177 | 0.953968118 |
| 0.356863627 | -0.193623585 | 0.104319013 | 0.003736177 | 0.953968118 |
| 0.357564654 | -0.299448095 | 1           | 0.397942841 | 0.953968118 |
| 0.357888103 | 0.057329199  | 1.10E-07    | 9.47E-06    | 0.953968118 |
| 0.357888103 | 0.057329199  | 1.10E-07    | 9.47E-06    | 0.953968118 |
| 0.357888103 | 0.057329199  | 1.10E-07    | 9.47E-06    | 0.953968118 |
| 0.3579249   | -0.295424528 | 1           | 0.305102445 | 0.953968118 |
| 0.3579249   | -0.295424528 | 1           | 0.305102445 | 0.953968118 |
| 0.35809033  | 0.230248065  | 0.412603306 | 0.025431136 | 0.953968118 |
| 0.358269978 | -0.106610759 | 0.001207877 | 1.65E-05    | 0.953968118 |
| 0.358321147 | -0.047339496 | 4.58E-06    | 4.93E-08    | 0.953968118 |
| 0.358321147 | -0.047339496 | 4.58E-06    | 4.93E-08    | 0.953968118 |
| 0.358352863 | 0.308240363  | 1           | 0.601859652 | 0.953968118 |
| 0.358429056 | -0.310710803 | 1           | 0.704162183 | 0.953968118 |
| 0.358429056 | -0.310710803 | 1           | 0.704162183 | 0.953968118 |
| 0.358838955 | -0.311953718 | 1           | 1           | 0.953968118 |
| 0.359429673 | 0.170930939  | 0.001611045 | 0.042826979 | 0.953968118 |
| 0.359755283 | 0.210407417  | 0.205025676 | 0.009270366 | 0.953968118 |
| 0.359892921 | 0.112581407  | 0.00373662  | 4.69E-05    | 0.953968118 |
| 0.359892921 | 0.112581407  | 0.00373662  | 4.69E-05    | 0.953968118 |
| 0.36006664  | -0.053709173 | 1.22E-05    | 9.27E-08    | 0.953968118 |
| 0.36006664  | -0.053709173 | 1.22E-05    | 9.27E-08    | 0.953968118 |
| 0.360073016 | 0.24216094   | 0.439859057 | 0.040084197 | 0.953968118 |
| 0.360623867 | -0.273733749 | 0.192696374 | 0.850173656 | 0.953968118 |
| 0.360623867 | -0.273733749 | 0.192696374 | 0.850173656 | 0.953968118 |
| 0.361466329 | -0.303368755 | 1           | 0.489952655 | 0.953968118 |
| 0.36170075  | 0.287454878  | 0.307400178 | 1           | 0.953968118 |
| 0.36170075  | 0.287454878  | 0.307400178 | 1           | 0.953968118 |
| 0.361915897 | 0.310057452  | 1           | 1           | 0.953968118 |
| 0.361942131 | 0.24528142   | 0.439859057 | 0.052574033 | 0.953968118 |
| 0.361957491 | 0.192378274  | 0.008580492 | 0.085309726 | 0.953968118 |
| 0.362103096 | -0.079150789 | 0.000249829 | 3.06E-06    | 0.953968118 |
| 0.362103096 | -0.079150789 | 0.000249829 | 3.06E-06    | 0.953968118 |

|             |              |             |             |             |
|-------------|--------------|-------------|-------------|-------------|
| 0.362103096 | -0.079150789 | 0.000249829 | 3.06E-06    | 0.953968118 |
| 0.362360568 | -0.135064371 | 0.016023223 | 0.000124759 | 0.953968118 |
| 0.362632665 | 0.296422775  | 0.439859057 | 1           | 0.953968118 |
| 0.362632665 | 0.296422775  | 0.439859057 | 1           | 0.953968118 |
| 0.362898941 | 0.12012841   | 0.008580492 | 6.41E-05    | 0.953968118 |
| 0.363011661 | 0.30769485   | 1           | 0.704162183 | 0.953968118 |
| 0.363049645 | -0.308285777 | 0.737584497 | 1           | 0.953968118 |
| 0.363130007 | 0.036973793  | 7.89E-09    | 2.98E-07    | 0.953968118 |
| 0.363130007 | 0.036973793  | 7.89E-09    | 2.98E-07    | 0.953968118 |
| 0.363393558 | 0.306237339  | 0.584854032 | 1           | 0.953968118 |
| 0.363393558 | 0.306237339  | 0.584854032 | 1           | 0.953968118 |
| 0.363428551 | 0.203398324  | 0.19926681  | 0.006372161 | 0.953968118 |
| 0.363428551 | 0.203398324  | 0.19926681  | 0.006372161 | 0.953968118 |
| 0.363531241 | -0.20575893  | 0.19926681  | 0.009270366 | 0.953968118 |
| 0.363607601 | -0.053011445 | 1.22E-05    | 9.27E-08    | 0.953968118 |
| 0.363607601 | -0.053011445 | 1.22E-05    | 9.27E-08    | 0.953968118 |
| 0.363607601 | -0.053011445 | 1.22E-05    | 9.27E-08    | 0.953968118 |
| 0.36365438  | 0.137696735  | 0.018163994 | 0.00028972  | 0.953968118 |
| 0.363863716 | 0.091138491  | 1.22E-05    | 0.000324671 | 0.953968118 |
| 0.363863716 | 0.091138491  | 1.22E-05    | 0.000324671 | 0.953968118 |
| 0.36455541  | 0.270149104  | 0.737584497 | 0.126792252 | 0.953968118 |
| 0.364704226 | 0.25614735   | 0.095538718 | 0.489952655 | 0.953968118 |
| 0.364704226 | 0.25614735   | 0.095538718 | 0.489952655 | 0.953968118 |
| 0.3647153   | 0.163942664  | 0.043105813 | 0.001090387 | 0.953968118 |
| 0.364832129 | -0.304889526 | 0.584854032 | 1           | 0.953968118 |
| 0.364889531 | -0.308260123 | 1           | 1           | 0.953968118 |
| 0.364895085 | 0.291325094  | 1           | 0.364167203 | 0.953968118 |
| 0.364973408 | -0.055545336 | 1.56E-05    | 9.79E-08    | 0.953968118 |
| 0.364973408 | -0.055545336 | 1.56E-05    | 9.79E-08    | 0.953968118 |
| 0.364973408 | -0.055545336 | 1.56E-05    | 9.79E-08    | 0.953968118 |
| 0.365174461 | -0.052801482 | 1.22E-05    | 9.27E-08    | 0.953968118 |
| 0.365294549 | 0.072735267  | 1.23E-06    | 7.48E-05    | 0.953968118 |
| 0.365294549 | 0.072735267  | 1.23E-06    | 7.48E-05    | 0.953968118 |
| 0.365294549 | 0.072735267  | 1.23E-06    | 7.48E-05    | 0.953968118 |
| 0.36533801  | -0.101760442 | 0.001207877 | 1.04E-05    | 0.953968118 |
| 0.36533801  | -0.101760442 | 0.001207877 | 1.04E-05    | 0.953968118 |
| 0.36533801  | -0.101760442 | 0.001207877 | 1.04E-05    | 0.953968118 |
| 0.366104612 | -0.154169976 | 0.034012327 | 0.000596242 | 0.953968118 |
| 0.366104612 | -0.154169976 | 0.034012327 | 0.000596242 | 0.953968118 |
| 0.366115166 | 0.294454579  | 1           | 0.397942841 | 0.953968118 |
| 0.366171193 | 0.254672054  | 0.095538718 | 0.489952655 | 0.953968118 |
| 0.366171193 | 0.254672054  | 0.095538718 | 0.489952655 | 0.953968118 |
| 0.366216617 | 0.230786035  | 0.035148121 | 0.305102445 | 0.953968118 |
| 0.366433798 | -0.252061593 | 0.584854032 | 0.060775899 | 0.953968118 |
| 0.366463684 | -0.301242422 | 0.584854032 | 1           | 0.953968118 |
| 0.366566411 | 0.230959107  | 0.412603306 | 0.029310175 | 0.953968118 |
| 0.366751485 | 0.299327351  | 0.439859057 | 1           | 0.953968118 |
| 0.366751485 | 0.299327351  | 0.439859057 | 1           | 0.953968118 |
| 0.366891968 | -0.240891156 | 0.043105813 | 0.416730107 | 0.953968118 |
| 0.367128446 | 0.296849762  | 0.439859057 | 1           | 0.953968118 |
| 0.367178727 | -0.306684465 | 0.989933981 | 1           | 0.953968118 |
| 0.367379212 | 0.304114962  | 1           | 0.704162183 | 0.953968118 |
| 0.367379212 | 0.304114962  | 1           | 0.704162183 | 0.953968118 |
| 0.367723812 | -0.300335128 | 1           | 0.489952655 | 0.953968118 |
| 0.367741787 | 0.243512525  | 0.439859057 | 0.052574033 | 0.953968118 |
| 0.368163605 | -0.304790774 | 1           | 0.704162183 | 0.953968118 |
| 0.368163605 | -0.304790774 | 1           | 0.704162183 | 0.953968118 |
| 0.368597422 | 0.304449137  | 0.737584497 | 1           | 0.953968118 |
| 0.368597422 | 0.304449137  | 0.737584497 | 1           | 0.953968118 |
| 0.368621971 | 0.250903109  | 0.087427713 | 0.489952655 | 0.953968118 |
| 0.368621971 | 0.250903109  | 0.087427713 | 0.489952655 | 0.953968118 |
| 0.368690406 | 0.202497731  | 0.19926681  | 0.009270366 | 0.953968118 |
| 0.368755134 | 0.240383887  | 0.043105813 | 0.416730107 | 1           |
| 0.368808428 | -0.292041992 | 1           | 0.397942841 | 1           |

|             |              |             |             |   |
|-------------|--------------|-------------|-------------|---|
| 0.368861628 | 0.25547834   | 0.584854032 | 0.085309726 | 1 |
| 0.369155625 | 0.303590279  | 1           | 0.704162183 | 1 |
| 0.369155625 | 0.303590279  | 1           | 0.704162183 | 1 |
| 0.369233675 | -0.305568978 | 1           | 1           | 1 |
| 0.369644054 | 0.119048977  | 8.53E-05    | 0.003736177 | 1 |
| 0.369644054 | 0.119048977  | 8.53E-05    | 0.003736177 | 1 |
| 0.369808498 | -0.256261852 | 0.584854032 | 0.085309726 | 1 |
| 0.36996169  | 0.253546491  | 0.095538718 | 0.489952655 | 1 |
| 0.370231126 | -0.288601415 | 0.412603306 | 1           | 1 |
| 0.370231126 | -0.288601415 | 0.412603306 | 1           | 1 |
| 0.370433109 | 0.271975419  | 0.881481882 | 0.145037597 | 1 |
| 0.370433109 | 0.271975419  | 0.881481882 | 0.145037597 | 1 |
| 0.370433109 | 0.271975419  | 0.881481882 | 0.145037597 | 1 |
| 0.370446681 | 0.28946429   | 0.412603306 | 1           | 1 |
| 0.370488004 | 0.275386729  | 0.989933981 | 0.164911511 | 1 |
| 0.37060726  | -0.060765837 | 6.19E-05    | 2.98E-07    | 1 |
| 0.370742925 | -0.295005768 | 1           | 0.489952655 | 1 |
| 0.371269552 | 0.29840408   | 1           | 0.489952655 | 1 |
| 0.371269552 | 0.29840408   | 1           | 0.489952655 | 1 |
| 0.371801356 | 0.119854419  | 0.000155445 | 0.003736177 | 1 |
| 0.371872083 | -0.270267155 | 0.881481882 | 0.145037597 | 1 |
| 0.372219998 | -0.301589573 | 1           | 0.704162183 | 1 |
| 0.372247898 | -0.293988379 | 0.439859057 | 1           | 1 |
| 0.372247898 | -0.293988379 | 0.439859057 | 1           | 1 |
| 0.372450386 | 0.227569829  | 0.412603306 | 0.025431136 | 1 |
| 0.37292271  | 0.239170982  | 0.439859057 | 0.052574033 | 1 |
| 0.373058716 | -0.121353555 | 0.008580492 | 0.000115129 | 1 |
| 0.373119731 | 0.290805474  | 1           | 0.416730107 | 1 |
| 0.373249129 | 0.302835473  | 1           | 1           | 1 |
| 0.373254884 | 0.258588156  | 0.134257478 | 0.704162183 | 1 |
| 0.373771211 | 0.250317268  | 0.584854032 | 0.066020955 | 1 |
| 0.373771211 | 0.250317268  | 0.584854032 | 0.066020955 | 1 |
| 0.374168902 | 0.301614889  | 1           | 0.850173656 | 1 |
| 0.374743872 | -0.298983592 | 0.584854032 | 1           | 1 |
| 0.374743872 | -0.298983592 | 0.584854032 | 1           | 1 |
| 0.374806923 | 0.020910534  | 3.99E-10    | 6.53E-09    | 1 |
| 0.375257717 | 0.300752598  | 0.737584497 | 1           | 1 |
| 0.375570549 | -0.116011109 | 0.004526275 | 4.69E-05    | 1 |
| 0.375570549 | -0.116011109 | 0.004526275 | 4.69E-05    | 1 |
| 0.375570549 | -0.116011109 | 0.004526275 | 4.69E-05    | 1 |
| 0.375570549 | -0.116011109 | 0.004526275 | 4.69E-05    | 1 |
| 0.375570549 | -0.116011109 | 0.004526275 | 4.69E-05    | 1 |
| 0.375570549 | -0.116011109 | 0.004526275 | 4.69E-05    | 1 |
| 0.375634102 | 0.299866603  | 0.737584497 | 1           | 1 |
| 0.375758976 | 0.301012696  | 1           | 0.850173656 | 1 |
| 0.375939267 | 0.266748264  | 0.783270054 | 0.145037597 | 1 |
| 0.376012606 | -0.27875253  | 0.307400178 | 1           | 1 |
| 0.376033365 | 0.158588598  | 0.001207877 | 0.029310175 | 1 |
| 0.376033365 | 0.158588598  | 0.001207877 | 0.029310175 | 1 |
| 0.376062589 | 0.239623963  | 0.073031096 | 0.416730107 | 1 |
| 0.376157128 | 0.225601016  | 0.412603306 | 0.025431136 | 1 |
| 0.376157128 | 0.225601016  | 0.412603306 | 0.025431136 | 1 |
| 0.376500596 | -0.263439112 | 0.737584497 | 0.129712192 | 1 |
| 0.376503734 | 0.289876032  | 0.439859057 | 1           | 1 |
| 0.376503734 | 0.289876032  | 0.439859057 | 1           | 1 |
| 0.376758685 | 0.299942939  | 0.737584497 | 1           | 1 |
| 0.37682564  | -0.163058066 | 0.043105813 | 0.001791344 | 1 |
| 0.377463007 | 0.299216364  | 0.737584497 | 1           | 1 |
| 0.377941369 | -0.25922499  | 0.169239932 | 0.704162183 | 1 |
| 0.377941369 | -0.25922499  | 0.169239932 | 0.704162183 | 1 |
| 0.377976438 | 0.179374887  | 0.007135475 | 0.066020955 | 1 |
| 0.378233458 | 0.176695933  | 0.004526275 | 0.060775899 | 1 |
| 0.378744233 | 0.156051647  | 0.001207877 | 0.025431136 | 1 |
| 0.379490428 | -0.12298713  | 0.009746439 | 0.000115129 | 1 |

|             |              |             |             |   |
|-------------|--------------|-------------|-------------|---|
| 0.379490428 | -0.12298713  | 0.009746439 | 0.000115129 | 1 |
| 0.379494348 | 0.060797458  | 4.10E-07    | 1.65E-05    | 1 |
| 0.379494348 | 0.060797458  | 4.10E-07    | 1.65E-05    | 1 |
| 0.379494348 | 0.060797458  | 4.10E-07    | 1.65E-05    | 1 |
| 0.379769098 | -0.266433263 | 0.205025676 | 0.850173656 | 1 |
| 0.379769098 | -0.266433263 | 0.205025676 | 0.850173656 | 1 |
| 0.379769098 | -0.266433263 | 0.205025676 | 0.850173656 | 1 |
| 0.379769098 | -0.266433263 | 0.205025676 | 0.850173656 | 1 |
| 0.379769098 | -0.266433263 | 0.205025676 | 0.850173656 | 1 |
| 0.379769098 | -0.266433263 | 0.205025676 | 0.850173656 | 1 |
| 0.380351332 | 0.298644142  | 1           | 1           | 1 |
| 0.380351332 | 0.298644142  | 1           | 1           | 1 |
| 0.380658087 | -0.22820628  | 0.412603306 | 0.031639242 | 1 |
| 0.380927586 | -0.183795796 | 0.095538718 | 0.004171959 | 1 |
| 0.381204796 | -0.133692015 | 0.018163994 | 0.00028972  | 1 |
| 0.381204796 | -0.133692015 | 0.018163994 | 0.00028972  | 1 |
| 0.381232767 | 0.138796382  | 0.0008771   | 0.011906673 | 1 |
| 0.381280819 | -0.296279861 | 1           | 0.704162183 | 1 |
| 0.381379471 | -0.292074157 | 1           | 0.489952655 | 1 |
| 0.381603576 | -0.137002724 | 0.018394332 | 0.0002997   | 1 |
| 0.381603576 | -0.137002724 | 0.018394332 | 0.0002997   | 1 |
| 0.381626944 | 0.193681999  | 0.016023223 | 0.126792252 | 1 |
| 0.382163829 | 0.159241411  | 0.043105813 | 0.001695222 | 1 |
| 0.382163829 | 0.159241411  | 0.043105813 | 0.001695222 | 1 |
| 0.382164053 | -0.296994501 | 1           | 0.850173656 | 1 |
| 0.382403441 | 0.277075375  | 1           | 0.242167012 | 1 |
| 0.382484902 | -0.278913627 | 0.412603306 | 1           | 1 |
| 0.382484902 | -0.278913627 | 0.412603306 | 1           | 1 |
| 0.382484902 | -0.278913627 | 0.412603306 | 1           | 1 |
| 0.382484902 | -0.278913627 | 0.412603306 | 1           | 1 |
| 0.382751026 | -0.23228845  | 0.043105813 | 0.397942841 | 1 |
| 0.382814081 | 0.257769951  | 0.169239932 | 0.704162183 | 1 |
| 0.382814081 | 0.257769951  | 0.169239932 | 0.704162183 | 1 |
| 0.382833274 | 0.043237226  | 4.36E-08    | 3.06E-06    | 1 |
| 0.383135594 | -0.242597291 | 0.584854032 | 0.060775899 | 1 |
| 0.383208795 | -0.213506046 | 0.307400178 | 0.02341474  | 1 |
| 0.383226708 | 0.056776639  | 3.18E-07    | 1.04E-05    | 1 |
| 0.383226708 | 0.056776639  | 3.18E-07    | 1.04E-05    | 1 |
| 0.383351217 | -0.041239393 | 1.23E-06    | 1.63E-08    | 1 |
| 0.383464878 | -0.227811833 | 0.412603306 | 0.031639242 | 1 |
| 0.383705043 | 0.253514666  | 0.584854032 | 0.102782106 | 1 |
| 0.383797331 | 0.296448665  | 1           | 1           | 1 |
| 0.383797331 | 0.296448665  | 1           | 1           | 1 |
| 0.384568924 | -0.209481909 | 0.295435331 | 0.02341474  | 1 |
| 0.384638141 | 0.293421139  | 0.691111318 | 1           | 1 |
| 0.385032784 | 0.23108808   | 0.043105813 | 0.397942841 | 1 |
| 0.385032784 | 0.23108808   | 0.043105813 | 0.397942841 | 1 |
| 0.385075028 | 0.255020242  | 0.169239932 | 0.704162183 | 1 |
| 0.385175334 | -0.107222513 | 0.003169634 | 4.69E-05    | 1 |
| 0.385582862 | -0.147583109 | 0.034012327 | 0.000596242 | 1 |
| 0.385981778 | 0.253557942  | 0.169239932 | 0.704162183 | 1 |
| 0.385981778 | 0.253557942  | 0.169239932 | 0.704162183 | 1 |
| 0.386069558 | 0.184767128  | 0.009746439 | 0.085309726 | 1 |
| 0.386070849 | 0.264881483  | 0.881481882 | 0.145037597 | 1 |
| 0.386110189 | 0.290866076  | 1           | 0.645935818 | 1 |
| 0.386377161 | 0.071223829  | 1.84E-06    | 7.48E-05    | 1 |
| 0.386913563 | 0.054521331  | 1.97E-07    | 9.47E-06    | 1 |
| 0.386913563 | 0.054521331  | 1.97E-07    | 9.47E-06    | 1 |
| 0.387076923 | -0.287951917 | 0.584854032 | 1           | 1 |
| 0.38722304  | -0.294338646 | 1           | 1           | 1 |
| 0.387858192 | -0.245292504 | 0.584854032 | 0.085309726 | 1 |
| 0.387999059 | 0.216876173  | 0.035148121 | 0.242167012 | 1 |
| 0.388222881 | -0.180182503 | 0.095538718 | 0.004171959 | 1 |
| 0.388375625 | 0.096950875  | 6.19E-05    | 0.000997588 | 1 |

|             |              |             |             |   |
|-------------|--------------|-------------|-------------|---|
| 0.388375625 | 0.096950875  | 6.19E-05    | 0.000997588 | 1 |
| 0.388375625 | 0.096950875  | 6.19E-05    | 0.000997588 | 1 |
| 0.388458055 | 0.288442725  | 0.584854032 | 1           | 1 |
| 0.388458055 | 0.288442725  | 0.584854032 | 1           | 1 |
| 0.388762256 | 0.249406766  | 0.584854032 | 0.10273905  | 1 |
| 0.388832299 | -0.223450338 | 0.412603306 | 0.031639242 | 1 |
| 0.389626465 | 0.08099203   | 5.98E-06    | 0.00028972  | 1 |
| 0.389664474 | 0.291866296  | 0.737584497 | 1           | 1 |
| 0.389941457 | 0.045538172  | 9.36E-08    | 3.06E-06    | 1 |
| 0.390274664 | -0.25226629  | 0.691111318 | 0.126792252 | 1 |
| 0.390340371 | 0.262102331  | 0.881481882 | 0.145037597 | 1 |
| 0.390585107 | 0.22464045   | 0.412603306 | 0.031639242 | 1 |
| 0.391124089 | 0.285345451  | 0.584854032 | 1           | 1 |
| 0.391124089 | 0.285345451  | 0.584854032 | 1           | 1 |
| 0.391153143 | 0.281679847  | 0.439859057 | 1           | 1 |
| 0.391732188 | -0.284935944 | 0.584854032 | 1           | 1 |
| 0.392042    | -0.127736109 | 0.016023223 | 0.000163543 | 1 |
| 0.392042    | -0.127736109 | 0.016023223 | 0.000163543 | 1 |
| 0.392042    | -0.127736109 | 0.016023223 | 0.000163543 | 1 |
| 0.392042    | -0.127736109 | 0.016023223 | 0.000163543 | 1 |
| 0.392302591 | -0.064401341 | 6.77E-05    | 8.55E-07    | 1 |
| 0.392450891 | 0.245421349  | 0.104319013 | 0.601859652 | 1 |
| 0.392450891 | 0.245421349  | 0.104319013 | 0.601859652 | 1 |
| 0.392474321 | -0.24373854  | 0.099208829 | 0.489952655 | 1 |
| 0.392474321 | -0.24373854  | 0.099208829 | 0.489952655 | 1 |
| 0.39301299  | 0.220908311  | 0.412603306 | 0.031639242 | 1 |
| 0.39301299  | 0.220908311  | 0.412603306 | 0.031639242 | 1 |
| 0.393674064 | -0.253629304 | 0.737584497 | 0.145037597 | 1 |
| 0.393674064 | -0.253629304 | 0.737584497 | 0.145037597 | 1 |
| 0.393830081 | -0.290132951 | 1           | 1           | 1 |
| 0.394688272 | -0.281317227 | 1           | 0.489952655 | 1 |
| 0.394758462 | 0.276094204  | 1           | 0.397942841 | 1 |
| 0.394759535 | -0.201796939 | 0.241457119 | 0.011906673 | 1 |
| 0.394759535 | -0.201796939 | 0.241457119 | 0.011906673 | 1 |
| 0.394872432 | -0.287630739 | 1           | 0.704162183 | 1 |
| 0.394872432 | -0.287630739 | 1           | 0.704162183 | 1 |
| 0.394872432 | -0.287630739 | 1           | 0.704162183 | 1 |
| 0.395129983 | 0.275158981  | 1           | 0.397942841 | 1 |
| 0.395129983 | 0.275158981  | 1           | 0.397942841 | 1 |
| 0.395547835 | -0.170546823 | 0.075374611 | 0.003736177 | 1 |
| 0.395547835 | -0.170546823 | 0.075374611 | 0.003736177 | 1 |
| 0.395572967 | 0.260564826  | 0.88322726  | 0.164911511 | 1 |
| 0.396299044 | 0.216923951  | 0.412603306 | 0.029310175 | 1 |
| 0.396326051 | 0.288651125  | 1           | 1           | 1 |
| 0.396527878 | 0.144971151  | 0.0008771   | 0.02341474  | 1 |
| 0.396527878 | 0.144971151  | 0.0008771   | 0.02341474  | 1 |
| 0.396594838 | 0.26054894   | 0.295435331 | 1           | 1 |
| 0.396766904 | -0.219589322 | 0.412603306 | 0.031639242 | 1 |
| 0.397072979 | 0.235996421  | 0.439859057 | 0.061934943 | 1 |
| 0.397072979 | 0.235996421  | 0.439859057 | 0.061934943 | 1 |
| 0.397130663 | -0.281095226 | 0.584854032 | 1           | 1 |
| 0.397312775 | 0.167891552  | 0.075374611 | 0.002420613 | 1 |
| 0.39746555  | 0.141412077  | 0.030989574 | 0.000596242 | 1 |
| 0.39747559  | -0.283530953 | 0.584854032 | 1           | 1 |
| 0.39747559  | -0.283530953 | 0.584854032 | 1           | 1 |
| 0.398107235 | 0.233219448  | 0.087427713 | 0.489952655 | 1 |
| 0.398107235 | 0.233219448  | 0.087427713 | 0.489952655 | 1 |
| 0.398107235 | 0.233219448  | 0.087427713 | 0.489952655 | 1 |
| 0.398126848 | 0.170300868  | 0.087427713 | 0.003736177 | 1 |
| 0.398285413 | 0.214181113  | 0.03951775  | 0.242167012 | 1 |
| 0.398387717 | 0.234128099  | 0.439859057 | 0.061934943 | 1 |
| 0.398548103 | -0.095265217 | 0.001207877 | 1.65E-05    | 1 |
| 0.399235667 | 0.160432951  | 0.003169634 | 0.042826979 | 1 |
| 0.400164433 | 0.196695118  | 0.025193624 | 0.145037597 | 1 |

|             |              |             |             |   |
|-------------|--------------|-------------|-------------|---|
| 0.400299399 | -0.245623791 | 0.584854032 | 0.126792252 | 1 |
| 0.400326354 | 0.28325882   | 1           | 0.704162183 | 1 |
| 0.400326354 | 0.28325882   | 1           | 0.704162183 | 1 |
| 0.40034961  | -0.27802019  | 0.439859057 | 1           | 1 |
| 0.40034961  | -0.27802019  | 0.439859057 | 1           | 1 |
| 0.40034961  | -0.27802019  | 0.439859057 | 1           | 1 |
| 0.40034961  | -0.27802019  | 0.439859057 | 1           | 1 |
| 0.400514375 | -0.170215039 | 0.087427713 | 0.003736177 | 1 |
| 0.400514375 | -0.170215039 | 0.087427713 | 0.003736177 | 1 |
| 0.400752788 | 0.261782734  | 1           | 0.242167012 | 1 |
| 0.400760605 | 0.249560585  | 0.192696374 | 0.704162183 | 1 |
| 0.401633446 | 0.138128562  | 0.0008771   | 0.017403168 | 1 |
| 0.401633446 | 0.138128562  | 0.0008771   | 0.017403168 | 1 |
| 0.401705596 | 0.235648287  | 0.584854032 | 0.085309726 | 1 |
| 0.401705596 | 0.235648287  | 0.584854032 | 0.085309726 | 1 |
| 0.401705596 | 0.235648287  | 0.584854032 | 0.085309726 | 1 |
| 0.402470164 | 0.277991506  | 1           | 0.489952655 | 1 |
| 0.402496473 | 0.225816098  | 0.439859057 | 0.053084396 | 1 |
| 0.402963655 | -0.229877916 | 0.439859057 | 0.060775899 | 1 |
| 0.403039964 | 0.124422435  | 0.000295301 | 0.006372161 | 1 |
| 0.403230004 | 0.066946417  | 1.23E-06    | 4.69E-05    | 1 |
| 0.403523375 | -0.252651389 | 0.205025676 | 0.850173656 | 1 |
| 0.403523375 | -0.252651389 | 0.205025676 | 0.850173656 | 1 |
| 0.404074638 | 0.283762593  | 0.88322726  | 1           | 1 |
| 0.404074638 | 0.283762593  | 0.88322726  | 1           | 1 |
| 0.404245823 | -0.179358428 | 0.120559922 | 0.006372161 | 1 |
| 0.404539018 | 0.274452591  | 0.439859057 | 1           | 1 |
| 0.404564933 | 0.282425528  | 0.737584497 | 1           | 1 |
| 0.404888899 | 0.248166772  | 0.737584497 | 0.145037597 | 1 |
| 0.404888899 | 0.248166772  | 0.737584497 | 0.145037597 | 1 |
| 0.405075926 | -0.174025444 | 0.095538718 | 0.005827837 | 1 |
| 0.405075926 | -0.174025444 | 0.095538718 | 0.005827837 | 1 |
| 0.405230067 | 0.179019053  | 0.010835964 | 0.085309726 | 1 |
| 0.405230067 | 0.179019053  | 0.010835964 | 0.085309726 | 1 |
| 0.405247558 | -0.261238725 | 1           | 0.242167012 | 1 |
| 0.405247558 | -0.261238725 | 1           | 0.242167012 | 1 |
| 0.405247558 | -0.261238725 | 1           | 0.242167012 | 1 |
| 0.405305471 | 0.055109452  | 3.18E-07    | 1.04E-05    | 1 |
| 0.405391123 | 0.283383447  | 1           | 1           | 1 |
| 0.405517316 | -0.172573097 | 0.008580492 | 0.066020955 | 1 |
| 0.405577248 | -0.142220542 | 0.034012327 | 0.000997588 | 1 |
| 0.405577248 | -0.142220542 | 0.034012327 | 0.000997588 | 1 |
| 0.405616015 | -0.277975525 | 1           | 0.601859652 | 1 |
| 0.405888714 | -0.282856813 | 1           | 1           | 1 |
| 0.405888714 | -0.282856813 | 1           | 1           | 1 |
| 0.405888714 | -0.282856813 | 1           | 1           | 1 |
| 0.406277929 | 0.150516237  | 0.001207877 | 0.029310175 | 1 |
| 0.406277929 | 0.150516237  | 0.001207877 | 0.029310175 | 1 |
| 0.406277929 | 0.150516237  | 0.001207877 | 0.029310175 | 1 |
| 0.406465809 | -0.086108672 | 0.0008771   | 9.47E-06    | 1 |
| 0.406466366 | -0.282453026 | 1           | 1           | 1 |
| 0.406486789 | 0.226927992  | 0.439859057 | 0.060775899 | 1 |
| 0.406486789 | 0.226927992  | 0.439859057 | 0.060775899 | 1 |
| 0.406486789 | 0.226927992  | 0.439859057 | 0.060775899 | 1 |
| 0.406561049 | 0.228102402  | 0.439859057 | 0.060775899 | 1 |
| 0.406561049 | 0.228102402  | 0.439859057 | 0.060775899 | 1 |
| 0.406588633 | -0.25875349  | 1           | 0.242167012 | 1 |
| 0.40704082  | -0.240079891 | 0.584854032 | 0.102782106 | 1 |
| 0.407155544 | -0.238935607 | 0.584854032 | 0.10273905  | 1 |
| 0.407508231 | 0.218685173  | 0.043105813 | 0.397942841 | 1 |
| 0.407508231 | 0.218685173  | 0.043105813 | 0.397942841 | 1 |
| 0.407508231 | 0.218685173  | 0.043105813 | 0.397942841 | 1 |
| 0.407508231 | 0.218685173  | 0.043105813 | 0.397942841 | 1 |
| 0.407556251 | -0.251669532 | 0.881481882 | 0.145037597 | 1 |



|             |              |             |             |   |
|-------------|--------------|-------------|-------------|---|
| 0.407788813 | -0.208850194 | 0.035148121 | 0.242167012 | 1 |
| 0.408284101 | -0.081252667 | 0.0008771   | 5.99E-06    | 1 |
| 0.408770275 | 0.23766574   | 0.134257478 | 0.601859652 | 1 |
| 0.408905844 | 0.281250196  | 1           | 1           | 1 |
| 0.409012395 | 0.13363785   | 0.0008771   | 0.011906673 | 1 |
| 0.409763064 | -0.201604947 | 0.307400178 | 0.02341474  | 1 |
| 0.409926545 | -0.22559533  | 0.075374611 | 0.416730107 | 1 |
| 0.410010172 | 0.200047213  | 0.295435331 | 0.02341474  | 1 |
| 0.410010172 | 0.200047213  | 0.295435331 | 0.02341474  | 1 |
| 0.411038421 | -0.276080807 | 1           | 0.645935818 | 1 |
| 0.411038421 | -0.276080807 | 1           | 0.645935818 | 1 |
| 0.411057071 | -0.067925926 | 0.000155445 | 8.55E-07    | 1 |
| 0.411057071 | -0.067925926 | 0.000155445 | 8.55E-07    | 1 |
| 0.411400329 | 0.027685873  | 2.10E-09    | 9.79E-08    | 1 |
| 0.411482497 | 0.088368254  | 4.14E-05    | 0.000596242 | 1 |
| 0.411673087 | 0.190079021  | 0.024201521 | 0.145037597 | 1 |
| 0.411706521 | -0.036715932 | 1.09E-06    | 1.63E-08    | 1 |
| 0.411921582 | 0.258440448  | 1           | 0.242167012 | 1 |
| 0.41205504  | 0.232458062  | 0.099208829 | 0.489952655 | 1 |
| 0.41205504  | 0.232458062  | 0.099208829 | 0.489952655 | 1 |
| 0.41205504  | 0.232458062  | 0.099208829 | 0.489952655 | 1 |
| 0.412229747 | 0.27453618   | 0.584854032 | 1           | 1 |
| 0.412429673 | 0.225185834  | 0.087427713 | 0.489952655 | 1 |
| 0.412429673 | 0.225185834  | 0.087427713 | 0.489952655 | 1 |
| 0.412706751 | 0.269050434  | 1           | 0.489952655 | 1 |
| 0.412713157 | -0.278037864 | 0.881481882 | 1           | 1 |
| 0.412847546 | 0.172943138  | 0.009746439 | 0.085309726 | 1 |
| 0.412847546 | 0.172943138  | 0.009746439 | 0.085309726 | 1 |
| 0.41292789  | -0.271732065 | 1           | 0.489952655 | 1 |
| 0.41292789  | -0.271732065 | 1           | 0.489952655 | 1 |
| 0.412968142 | -0.144869232 | 0.035148121 | 0.001090387 | 1 |
| 0.412968142 | -0.144869232 | 0.035148121 | 0.001090387 | 1 |
| 0.413142016 | -0.152249913 | 0.043105813 | 0.001791344 | 1 |
| 0.413379674 | -0.270940984 | 1           | 0.489952655 | 1 |
| 0.413745786 | 0.267543694  | 1           | 0.416730107 | 1 |
| 0.413745786 | 0.267543694  | 1           | 0.416730107 | 1 |
| 0.413745786 | 0.267543694  | 1           | 0.416730107 | 1 |
| 0.41404584  | 0.054844656  | 4.10E-07    | 1.04E-05    | 1 |
| 0.414053386 | 0.2232733    | 0.439859057 | 0.060775899 | 1 |
| 0.414053386 | 0.2232733    | 0.439859057 | 0.060775899 | 1 |
| 0.414059744 | -0.029766072 | 1.10E-07    | 6.53E-09    | 1 |
| 0.414059744 | -0.029766072 | 1.10E-07    | 6.53E-09    | 1 |
| 0.414173139 | 0.203050304  | 0.035148121 | 0.242167012 | 1 |
| 0.415164446 | 0.264259587  | 1           | 0.397942841 | 1 |
| 0.415219892 | 0.133524996  | 0.0008771   | 0.011906673 | 1 |
| 0.415249607 | 0.21278127   | 0.043105813 | 0.364167203 | 1 |
| 0.415398307 | 0.269566142  | 1           | 0.489952655 | 1 |
| 0.415692378 | 0.262090826  | 1           | 0.364167203 | 1 |
| 0.415993394 | 0.277191781  | 1           | 1           | 1 |
| 0.416039458 | -0.277003077 | 1           | 1           | 1 |
| 0.41604458  | -0.249314321 | 0.295435331 | 0.850173656 | 1 |
| 0.41604458  | -0.249314321 | 0.295435331 | 0.850173656 | 1 |
| 0.41604458  | -0.249314321 | 0.295435331 | 0.850173656 | 1 |
| 0.41609146  | 0.256282557  | 1           | 0.242167012 | 1 |
| 0.416096067 | 0.266409751  | 0.439859057 | 1           | 1 |
| 0.416096067 | 0.266409751  | 0.439859057 | 1           | 1 |
| 0.416185161 | -0.1628545   | 0.075374611 | 0.003736177 | 1 |
| 0.41631033  | -0.276591667 | 0.989933981 | 1           | 1 |
| 0.416544779 | 0.104230001  | 8.53E-05    | 0.002420613 | 1 |
| 0.416589327 | -0.272161517 | 0.584854032 | 1           | 1 |
| 0.416589327 | -0.272161517 | 0.584854032 | 1           | 1 |
| 0.417110723 | 0.051924652  | 3.18E-07    | 9.47E-06    | 1 |
| 0.417110723 | 0.051924652  | 3.18E-07    | 9.47E-06    | 1 |
| 0.417110723 | 0.051924652  | 3.18E-07    | 9.47E-06    | 1 |

|             |              |             |             |   |
|-------------|--------------|-------------|-------------|---|
| 0.417321341 | 0.247815845  | 0.881481882 | 0.164911511 | 1 |
| 0.417416353 | 0.244821486  | 0.737584497 | 0.145037597 | 1 |
| 0.417416353 | 0.244821486  | 0.737584497 | 0.145037597 | 1 |
| 0.417416353 | 0.244821486  | 0.737584497 | 0.145037597 | 1 |
| 0.417563495 | 0.110507891  | 0.000228282 | 0.003736177 | 1 |
| 0.417783359 | 0.239406178  | 0.691111318 | 0.129712192 | 1 |
| 0.418282798 | 0.188704933  | 0.205025676 | 0.011906673 | 1 |
| 0.418305973 | 0.21054972   | 0.412603306 | 0.034534533 | 1 |
| 0.418703365 | 0.052224992  | 3.18E-07    | 9.47E-06    | 1 |
| 0.418752309 | -0.274360238 | 0.737584497 | 1           | 1 |
| 0.418894888 | -0.241667988 | 0.737584497 | 0.145037597 | 1 |
| 0.418894888 | -0.241667988 | 0.737584497 | 0.145037597 | 1 |
| 0.419180027 | 0.247806846  | 0.295435331 | 0.850173656 | 1 |
| 0.419200261 | -0.273174282 | 1           | 0.704162183 | 1 |
| 0.419226996 | -0.099298854 | 0.002810027 | 4.69E-05    | 1 |
| 0.419226996 | -0.099298854 | 0.002810027 | 4.69E-05    | 1 |
| 0.419226996 | -0.099298854 | 0.002810027 | 4.69E-05    | 1 |
| 0.419451628 | -0.179392152 | 0.169239932 | 0.009270366 | 1 |
| 0.419922571 | 0.222574708  | 0.095006685 | 0.489952655 | 1 |
| 0.420069031 | 0.160082789  | 0.004526275 | 0.053084396 | 1 |
| 0.420177025 | 0.235688046  | 0.584854032 | 0.126792252 | 1 |
| 0.420597874 | 0.274469093  | 1           | 1           | 1 |
| 0.420597874 | 0.274469093  | 1           | 1           | 1 |
| 0.420597874 | 0.274469093  | 1           | 1           | 1 |
| 0.420675829 | -0.265059964 | 0.439859057 | 1           | 1 |
| 0.420675829 | -0.265059964 | 0.439859057 | 1           | 1 |
| 0.4211838   | 0.239126132  | 0.737584497 | 0.145037597 | 1 |
| 0.421301209 | 0.272993616  | 1           | 0.850173656 | 1 |
| 0.421301209 | 0.272993616  | 1           | 0.850173656 | 1 |
| 0.421427505 | 0.243602816  | 0.205025676 | 0.850173656 | 1 |
| 0.421659282 | 0.26517555   | 0.439859057 | 1           | 1 |
| 0.421776092 | 0.200974815  | 0.307400178 | 0.025431136 | 1 |
| 0.421868018 | -0.186864723 | 0.025193624 | 0.145037597 | 1 |
| 0.421913332 | 0.256851175  | 1           | 0.364167203 | 1 |
| 0.42302435  | -0.210664274 | 0.412603306 | 0.042826979 | 1 |
| 0.423262429 | -0.266998002 | 0.584854032 | 1           | 1 |
| 0.423262429 | -0.266998002 | 0.584854032 | 1           | 1 |
| 0.423298209 | -0.27243993  | 1           | 1           | 1 |
| 0.423298209 | -0.27243993  | 1           | 1           | 1 |
| 0.423368553 | 0.254412778  | 1           | 0.242167012 | 1 |
| 0.423745247 | 0.141230322  | 0.001207877 | 0.025431136 | 1 |
| 0.424367338 | 0.271822563  | 1           | 1           | 1 |
| 0.424367338 | 0.271822563  | 1           | 1           | 1 |
| 0.424367338 | 0.271822563  | 1           | 1           | 1 |
| 0.424367338 | 0.271822563  | 1           | 1           | 1 |
| 0.424367338 | 0.271822563  | 1           | 1           | 1 |
| 0.424367338 | 0.271822563  | 1           | 1           | 1 |
| 0.424511143 | 0.165619035  | 0.095006685 | 0.004171959 | 1 |
| 0.424638956 | -0.26303092  | 0.439859057 | 1           | 1 |
| 0.425019292 | 0.234349662  | 0.584854032 | 0.126792252 | 1 |
| 0.425406093 | 0.200067975  | 0.035148121 | 0.242167012 | 1 |
| 0.425406093 | 0.200067975  | 0.035148121 | 0.242167012 | 1 |
| 0.425764342 | -0.111484187 | 0.008580492 | 0.000124759 | 1 |
| 0.425764342 | -0.111484187 | 0.008580492 | 0.000124759 | 1 |
| 0.426212993 | -0.165781597 | 0.095538718 | 0.005827837 | 1 |
| 0.426213153 | 0.254526898  | 1           | 0.364167203 | 1 |
| 0.426324411 | 0.194818954  | 0.034012327 | 0.242167012 | 1 |
| 0.426477336 | -0.171387972 | 0.104319013 | 0.006372161 | 1 |
| 0.426477336 | -0.171387972 | 0.104319013 | 0.006372161 | 1 |
| 0.426477336 | -0.171387972 | 0.104319013 | 0.006372161 | 1 |
| 0.426552976 | -0.238954081 | 0.737584497 | 0.145037597 | 1 |
| 0.426552976 | -0.238954081 | 0.737584497 | 0.145037597 | 1 |
| 0.427101209 | -0.269494616 | 1           | 0.850173656 | 1 |
| 0.427101209 | -0.269494616 | 1           | 0.850173656 | 1 |

|             |              |             |             |   |
|-------------|--------------|-------------|-------------|---|
| 0.42733026  | 0.069337041  | 4.58E-06    | 0.000115129 | 1 |
| 0.427485562 | -0.158405212 | 0.075374611 | 0.003736177 | 1 |
| 0.427840193 | 0.229122095  | 0.584854032 | 0.126792252 | 1 |
| 0.428164326 | -0.270090399 | 1           | 1           | 1 |
| 0.428164326 | -0.270090399 | 1           | 1           | 1 |
| 0.428208392 | 0.1345862    | 0.0008771   | 0.02341474  | 1 |
| 0.428208392 | 0.1345862    | 0.0008771   | 0.02341474  | 1 |
| 0.428208392 | 0.1345862    | 0.0008771   | 0.02341474  | 1 |
| 0.428756416 | 0.141824245  | 0.001207877 | 0.025431136 | 1 |
| 0.428759834 | -0.266797478 | 0.737584497 | 1           | 1 |
| 0.428780626 | -0.239125558 | 0.737584497 | 0.145037597 | 1 |
| 0.428798465 | -0.238042697 | 0.205025676 | 0.704162183 | 1 |
| 0.428798465 | -0.238042697 | 0.205025676 | 0.704162183 | 1 |
| 0.428798465 | -0.238042697 | 0.205025676 | 0.704162183 | 1 |
| 0.428798465 | -0.238042697 | 0.205025676 | 0.704162183 | 1 |
| 0.429090214 | 0.037702549  | 2.78E-08    | 8.55E-07    | 1 |
| 0.429090214 | 0.037702549  | 2.78E-08    | 8.55E-07    | 1 |
| 0.429438654 | -0.135555616 | 0.034012327 | 0.000997588 | 1 |
| 0.429438654 | -0.135555616 | 0.034012327 | 0.000997588 | 1 |
| 0.429471135 | -0.099320752 | 0.003169634 | 4.69E-05    | 1 |
| 0.429674181 | 0.25558007   | 1           | 0.397942841 | 1 |
| 0.429674181 | 0.25558007   | 1           | 0.397942841 | 1 |
| 0.429675554 | -0.082522553 | 0.0008771   | 9.47E-06    | 1 |
| 0.429839195 | 0.235416597  | 0.19926681  | 0.704162183 | 1 |
| 0.429842598 | 0.146763905  | 0.003169634 | 0.031639242 | 1 |
| 0.429917555 | -0.231517899 | 0.584854032 | 0.126792252 | 1 |
| 0.429917555 | -0.231517899 | 0.584854032 | 0.126792252 | 1 |
| 0.430209695 | 0.262078929  | 0.584854032 | 1           | 1 |
| 0.430327275 | -0.268813988 | 1           | 1           | 1 |
| 0.430377757 | -0.063230701 | 8.53E-05    | 8.55E-07    | 1 |
| 0.430460029 | -0.228594256 | 0.584854032 | 0.126792252 | 1 |
| 0.43114848  | 0.262145879  | 1           | 0.489952655 | 1 |
| 0.431218556 | 0.17769669   | 0.169239932 | 0.009270366 | 1 |
| 0.431742758 | 0.233143746  | 0.691111318 | 0.145037597 | 1 |
| 0.432091422 | -0.074982422 | 0.000322414 | 4.11E-06    | 1 |
| 0.432091422 | -0.074982422 | 0.000322414 | 4.11E-06    | 1 |
| 0.432277133 | 0.211458643  | 0.075374611 | 0.397942841 | 1 |
| 0.432501087 | -0.15142196  | 0.043105813 | 0.002420613 | 1 |
| 0.432716726 | 0.149779621  | 0.004273917 | 0.041232736 | 1 |
| 0.432738078 | -0.233180789 | 0.691111318 | 0.145037597 | 1 |
| 0.433184429 | 0.210308605  | 0.439859057 | 0.053084396 | 1 |
| 0.433184429 | 0.210308605  | 0.439859057 | 0.053084396 | 1 |
| 0.433184429 | 0.210308605  | 0.439859057 | 0.053084396 | 1 |
| 0.433694417 | -0.116823039 | 0.010835964 | 0.0002997   | 1 |
| 0.434037983 | 0.264733553  | 0.737584497 | 1           | 1 |
| 0.43454152  | -0.256886084 | 0.439859057 | 1           | 1 |
| 0.43454152  | -0.256886084 | 0.439859057 | 1           | 1 |
| 0.434801906 | 0.263976732  | 1           | 0.704162183 | 1 |
| 0.434801906 | 0.263976732  | 1           | 0.704162183 | 1 |
| 0.434922652 | -0.253300895 | 1           | 0.416730107 | 1 |
| 0.4350992   | -0.178127991 | 0.192696374 | 0.011906673 | 1 |
| 0.43544731  | -0.265534877 | 1           | 1           | 1 |
| 0.435459591 | 0.197095091  | 0.043105813 | 0.242167012 | 1 |
| 0.435591788 | 0.125990936  | 0.024201521 | 0.000596242 | 1 |
| 0.435591788 | 0.125990936  | 0.024201521 | 0.000596242 | 1 |
| 0.435797753 | 0.187884475  | 0.034012327 | 0.164911511 | 1 |
| 0.435989268 | -0.252867881 | 1           | 0.416730107 | 1 |
| 0.435989268 | -0.252867881 | 1           | 0.416730107 | 1 |
| 0.436435691 | 0.263036029  | 1           | 0.704162183 | 1 |
| 0.436873998 | 0.264440999  | 1           | 1           | 1 |
| 0.43694547  | 0.025969404  | 2.10E-09    | 9.27E-08    | 1 |
| 0.437254788 | 0.263986859  | 1           | 0.850173656 | 1 |
| 0.4375687   | 0.231962865  | 0.737584497 | 0.145037597 | 1 |
| 0.4375687   | 0.231962865  | 0.737584497 | 0.145037597 | 1 |

|             |              |             |             |   |
|-------------|--------------|-------------|-------------|---|
| 0.4375687   | 0.231962865  | 0.737584497 | 0.145037597 | 1 |
| 0.437708432 | 0.166881719  | 0.104319013 | 0.006372161 | 1 |
| 0.437836097 | 0.061638557  | 1.84E-06    | 4.69E-05    | 1 |
| 0.437995797 | -0.086497962 | 0.0008771   | 1.65E-05    | 1 |
| 0.437995797 | -0.086497962 | 0.0008771   | 1.65E-05    | 1 |
| 0.438325264 | -0.26426186  | 1           | 1           | 1 |
| 0.438444643 | 0.260804445  | 0.691111318 | 1           | 1 |
| 0.438718496 | 0.044557346  | 9.36E-08    | 3.66E-06    | 1 |
| 0.438932371 | 0.189110288  | 0.034012327 | 0.164911511 | 1 |
| 0.439035095 | -0.223724478 | 0.584854032 | 0.126792252 | 1 |
| 0.439050747 | -0.260471702 | 0.691111318 | 1           | 1 |
| 0.439302791 | -0.26217241  | 1           | 0.850173656 | 1 |
| 0.439422945 | 0.063967806  | 3.58E-06    | 6.41E-05    | 1 |
| 0.439422945 | 0.063967806  | 3.58E-06    | 6.41E-05    | 1 |
| 0.439433754 | 0.198770042  | 0.412603306 | 0.031639242 | 1 |
| 0.440145533 | 0.240347629  | 0.989933981 | 0.242167012 | 1 |
| 0.440845271 | 0.262841383  | 1           | 1           | 1 |
| 0.4409034   | -0.240522121 | 0.989933981 | 0.242167012 | 1 |
| 0.4409034   | -0.240522121 | 0.989933981 | 0.242167012 | 1 |
| 0.441006862 | -0.257449797 | 1           | 0.601859652 | 1 |
| 0.441010448 | 0.216177234  | 0.439859057 | 0.085309726 | 1 |
| 0.441014024 | 0.080822917  | 1.56E-05    | 0.000348916 | 1 |
| 0.441014024 | 0.080822917  | 1.56E-05    | 0.000348916 | 1 |
| 0.441014024 | 0.080822917  | 1.56E-05    | 0.000348916 | 1 |
| 0.441014024 | 0.080822917  | 1.56E-05    | 0.000348916 | 1 |
| 0.441014024 | 0.080822917  | 1.56E-05    | 0.000348916 | 1 |
| 0.441014024 | 0.080822917  | 1.56E-05    | 0.000348916 | 1 |
| 0.441014024 | 0.080822917  | 1.56E-05    | 0.000348916 | 1 |
| 0.441177161 | 0.05979455   | 1.23E-06    | 4.69E-05    | 1 |
| 0.441191797 | -0.259841877 | 1           | 0.704162183 | 1 |
| 0.441191797 | -0.259841877 | 1           | 0.704162183 | 1 |
| 0.441351407 | 0.260411216  | 1           | 0.704162183 | 1 |
| 0.441415359 | 0.187936864  | 0.034012327 | 0.164911511 | 1 |
| 0.441701338 | -0.250550465 | 1           | 0.416730107 | 1 |
| 0.442001514 | -0.171197371 | 0.169239932 | 0.009270366 | 1 |
| 0.442001514 | -0.171197371 | 0.169239932 | 0.009270366 | 1 |
| 0.442046857 | 0.136965448  | 0.034012327 | 0.001695222 | 1 |
| 0.442046857 | 0.136965448  | 0.034012327 | 0.001695222 | 1 |
| 0.442071701 | 0.250468836  | 1           | 0.416730107 | 1 |
| 0.442228119 | -0.251926724 | 1           | 0.489952655 | 1 |
| 0.442239685 | -0.243393985 | 1           | 0.242167012 | 1 |
| 0.44237762  | 0.260189105  | 1           | 0.704162183 | 1 |
| 0.442682791 | 0.259925373  | 0.737584497 | 1           | 1 |
| 0.442795762 | 0.193789457  | 0.307400178 | 0.031639242 | 1 |
| 0.442795762 | 0.193789457  | 0.307400178 | 0.031639242 | 1 |
| 0.44298295  | -0.253227756 | 1           | 0.489952655 | 1 |
| 0.443054891 | -0.24761976  | 1           | 0.397942841 | 1 |
| 0.443337339 | -0.259854428 | 1           | 0.850173656 | 1 |
| 0.443357898 | 0.196237358  | 0.412603306 | 0.031639242 | 1 |
| 0.443542689 | 0.063821264  | 4.58E-06    | 6.41E-05    | 1 |
| 0.444213348 | 0.256157567  | 0.584854032 | 1           | 1 |
| 0.444444939 | 0.238634894  | 0.989933981 | 0.242167012 | 1 |
| 0.444444939 | 0.238634894  | 0.989933981 | 0.242167012 | 1 |
| 0.444444939 | 0.238634894  | 0.989933981 | 0.242167012 | 1 |
| 0.444752783 | 0.144559898  | 0.004273917 | 0.031639242 | 1 |
| 0.444819953 | 0.241253826  | 1           | 0.242167012 | 1 |
| 0.444819953 | 0.241253826  | 1           | 0.242167012 | 1 |
| 0.444861041 | -0.246966448 | 1           | 0.397942841 | 1 |
| 0.444861041 | -0.246966448 | 1           | 0.397942841 | 1 |
| 0.445030846 | 0.210574349  | 0.095006685 | 0.416730107 | 1 |
| 0.44506365  | -0.235020324 | 0.307400178 | 0.850173656 | 1 |
| 0.445665748 | 0.214665473  | 0.099208829 | 0.489952655 | 1 |
| 0.445763389 | -0.236487989 | 0.88322726  | 0.242167012 | 1 |
| 0.447259918 | 0.147507494  | 0.043105813 | 0.002420613 | 1 |
| 0.447259918 | 0.147507494  | 0.043105813 | 0.002420613 | 1 |

|             |              |             |             |   |
|-------------|--------------|-------------|-------------|---|
| 0.447284065 | -0.115198433 | 0.016023223 | 0.0002997   | 1 |
| 0.447382879 | 0.169764166  | 0.169239932 | 0.009270366 | 1 |
| 0.447474717 | 0.250984647  | 1           | 0.489952655 | 1 |
| 0.447474717 | 0.250984647  | 1           | 0.489952655 | 1 |
| 0.447552692 | -0.153737451 | 0.075374611 | 0.003736177 | 1 |
| 0.447552692 | -0.153737451 | 0.075374611 | 0.003736177 | 1 |
| 0.447646462 | 0.240874841  | 0.412603306 | 1           | 1 |
| 0.447982509 | 0.055500566  | 1.09E-06    | 1.93E-05    | 1 |
| 0.448028133 | -0.170557367 | 0.169239932 | 0.009270366 | 1 |
| 0.448293237 | 0.254832035  | 0.584854032 | 1           | 1 |
| 0.448293237 | 0.254832035  | 0.584854032 | 1           | 1 |
| 0.448362086 | 0.036399111  | 4.36E-08    | 8.55E-07    | 1 |
| 0.449014331 | -0.254482974 | 1           | 0.704162183 | 1 |
| 0.449014331 | -0.254482974 | 1           | 0.704162183 | 1 |
| 0.449380481 | -0.217068823 | 0.584854032 | 0.102782106 | 1 |
| 0.449380481 | -0.217068823 | 0.584854032 | 0.102782106 | 1 |
| 0.449380481 | -0.217068823 | 0.584854032 | 0.102782106 | 1 |
| 0.44965151  | 0.243531889  | 1           | 0.397942841 | 1 |
| 0.449762839 | 0.253499913  | 1           | 0.704162183 | 1 |
| 0.449905676 | -0.214334347 | 0.120559922 | 0.489952655 | 1 |
| 0.449958464 | 0.209763932  | 0.095538718 | 0.489952655 | 1 |
| 0.450539327 | -0.161630756 | 0.095538718 | 0.006372161 | 1 |
| 0.450717371 | 0.167571248  | 0.169239932 | 0.009270366 | 1 |
| 0.450717371 | 0.167571248  | 0.169239932 | 0.009270366 | 1 |
| 0.451044489 | -0.161326327 | 0.095538718 | 0.006372161 | 1 |
| 0.451542568 | 0.240140224  | 0.412603306 | 1           | 1 |
| 0.45183431  | 0.215567206  | 0.584854032 | 0.102782106 | 1 |
| 0.45183431  | 0.215567206  | 0.584854032 | 0.102782106 | 1 |
| 0.452282626 | 0.237649002  | 1           | 0.242167012 | 1 |
| 0.452282626 | 0.237649002  | 1           | 0.242167012 | 1 |
| 0.452317766 | 0.224570172  | 0.737584497 | 0.145037597 | 1 |
| 0.452394436 | -0.256303522 | 1           | 1           | 1 |
| 0.452705438 | 0.169813885  | 0.169239932 | 0.011906673 | 1 |
| 0.452990837 | 0.202541578  | 0.439859057 | 0.060775899 | 1 |
| 0.453536086 | 0.128684948  | 0.001207877 | 0.02341474  | 1 |
| 0.453891702 | 0.232551367  | 0.307400178 | 1           | 1 |
| 0.454261441 | 0.250516821  | 1           | 0.645935818 | 1 |
| 0.454286683 | 0.127303956  | 0.030989574 | 0.000997588 | 1 |
| 0.454322652 | -0.208183921 | 0.439859057 | 0.085309726 | 1 |
| 0.454457579 | -0.252440226 | 1           | 0.704162183 | 1 |
| 0.454490151 | 0.148097157  | 0.073031096 | 0.003736177 | 1 |
| 0.454494545 | 0.095597775  | 8.53E-05    | 0.002093839 | 1 |
| 0.454494545 | 0.095597775  | 8.53E-05    | 0.002093839 | 1 |
| 0.454606996 | 0.245876899  | 0.439859057 | 1           | 1 |
| 0.454911231 | -0.144720275 | 0.043105813 | 0.002420613 | 1 |
| 0.454962002 | 0.217648462  | 0.584854032 | 0.126792252 | 1 |
| 0.45554813  | 0.179033066  | 0.205025676 | 0.02341474  | 1 |
| 0.45554813  | 0.179033066  | 0.205025676 | 0.02341474  | 1 |
| 0.45554813  | 0.179033066  | 0.205025676 | 0.02341474  | 1 |
| 0.45554813  | 0.179033066  | 0.205025676 | 0.02341474  | 1 |
| 0.45554813  | 0.179033066  | 0.205025676 | 0.02341474  | 1 |
| 0.45554813  | 0.179033066  | 0.205025676 | 0.02341474  | 1 |
| 0.45554813  | 0.179033066  | 0.205025676 | 0.02341474  | 1 |
| 0.455636204 | -0.172502704 | 0.19926681  | 0.011906673 | 1 |
| 0.455705455 | -0.182038666 | 0.295435331 | 0.025431136 | 1 |
| 0.455955343 | 0.222722428  | 0.691111318 | 0.145037597 | 1 |
| 0.455955343 | 0.222722428  | 0.691111318 | 0.145037597 | 1 |
| 0.456100921 | -0.254232127 | 1           | 1           | 1 |
| 0.456100921 | -0.254232127 | 1           | 1           | 1 |
| 0.45612176  | 0.254179744  | 1           | 1           | 1 |
| 0.456479108 | 0.201326185  | 0.075374611 | 0.397942841 | 1 |
| 0.456780593 | 0.18834589   | 0.307400178 | 0.031639242 | 1 |
| 0.456886252 | -0.114277114 | 0.016023223 | 0.000324671 | 1 |
| 0.457106495 | 0.145598998  | 0.066393258 | 0.003668854 | 1 |
| 0.457321471 | -0.253013937 | 1           | 1           | 1 |

|             |              |             |             |   |
|-------------|--------------|-------------|-------------|---|
| 0.457321471 | -0.253013937 | 1           | 1           | 1 |
| 0.457501929 | 0.246044652  | 1           | 0.489952655 | 1 |
| 0.457689499 | -0.249992592 | 1           | 0.704162183 | 1 |
| 0.4578634   | -0.250964127 | 1           | 0.704162183 | 1 |
| 0.457865424 | 0.170989594  | 0.025193624 | 0.129712192 | 1 |
| 0.458552992 | 0.109930648  | 0.000467492 | 0.006372161 | 1 |
| 0.458552992 | 0.109930648  | 0.000467492 | 0.006372161 | 1 |
| 0.45898186  | 0.217369589  | 0.192696374 | 0.645935818 | 1 |
| 0.459195883 | 0.208721946  | 0.439859057 | 0.085309726 | 1 |
| 0.459442905 | 0.165201293  | 0.169239932 | 0.009270366 | 1 |
| 0.459599517 | 0.137145678  | 0.003169634 | 0.029310175 | 1 |
| 0.459599517 | 0.137145678  | 0.003169634 | 0.029310175 | 1 |
| 0.459599517 | 0.137145678  | 0.003169634 | 0.029310175 | 1 |
| 0.459599517 | 0.137145678  | 0.003169634 | 0.029310175 | 1 |
| 0.459599517 | 0.137145678  | 0.003169634 | 0.029310175 | 1 |
| 0.459599517 | 0.137145678  | 0.003169634 | 0.029310175 | 1 |
| 0.459660046 | 0.251151855  | 0.881481882 | 1           | 1 |
| 0.459660046 | 0.251151855  | 0.881481882 | 1           | 1 |
| 0.459816359 | -0.027611406 | 1.10E-07    | 6.53E-09    | 1 |
| 0.459816359 | -0.027611406 | 1.10E-07    | 6.53E-09    | 1 |
| 0.46001506  | -0.228107966 | 0.307400178 | 0.850173656 | 1 |
| 0.46001506  | -0.228107966 | 0.307400178 | 0.850173656 | 1 |
| 0.460335354 | 0.251888375  | 1           | 1           | 1 |
| 0.460335354 | 0.251888375  | 1           | 1           | 1 |
| 0.460882713 | 0.219398452  | 0.205025676 | 0.704162183 | 1 |
| 0.460882713 | 0.219398452  | 0.205025676 | 0.704162183 | 1 |
| 0.461235801 | -0.066499488 | 0.000249829 | 3.66E-06    | 1 |
| 0.461366174 | 0.203652417  | 0.439859057 | 0.06824239  | 1 |
| 0.461457055 | -0.203838262 | 0.439859057 | 0.06824239  | 1 |
| 0.461928633 | 0.200541265  | 0.087427713 | 0.416730107 | 1 |
| 0.462059463 | -0.240966216 | 1           | 0.489952655 | 1 |
| 0.462142584 | 0.171105986  | 0.19926681  | 0.017403168 | 1 |
| 0.462297613 | -0.250310955 | 1           | 1           | 1 |
| 0.462403889 | -0.191388298 | 0.412603306 | 0.042826979 | 1 |
| 0.462419547 | 0.216863899  | 0.19926681  | 0.645935818 | 1 |
| 0.462866712 | 0.220851174  | 0.737584497 | 0.145037597 | 1 |
| 0.463081369 | 0.177719794  | 0.034012327 | 0.164911511 | 1 |
| 0.463124238 | -0.246041892 | 0.584854032 | 1           | 1 |
| 0.463124238 | -0.246041892 | 0.584854032 | 1           | 1 |
| 0.46345831  | -0.222985984 | 0.737584497 | 0.164911511 | 1 |
| 0.46360361  | -0.248416251 | 1           | 0.850173656 | 1 |
| 0.463644514 | 0.241662395  | 1           | 0.489952655 | 1 |
| 0.463696207 | -0.211991725 | 0.584854032 | 0.126792252 | 1 |
| 0.463773766 | -0.249927098 | 1           | 1           | 1 |
| 0.464512719 | -0.160272645 | 0.120559922 | 0.009270366 | 1 |
| 0.464770261 | -0.24942401  | 1           | 1           | 1 |
| 0.464770261 | -0.24942401  | 1           | 1           | 1 |
| 0.464851246 | 0.153505348  | 0.010835964 | 0.061934943 | 1 |
| 0.464851246 | 0.153505348  | 0.010835964 | 0.061934943 | 1 |
| 0.465123036 | 0.128705538  | 0.001207877 | 0.02341474  | 1 |
| 0.465123036 | 0.128705538  | 0.001207877 | 0.02341474  | 1 |
| 0.46520768  | -0.233526373 | 0.412603306 | 1           | 1 |
| 0.46520768  | -0.233526373 | 0.412603306 | 1           | 1 |
| 0.465285374 | 0.211716838  | 0.584854032 | 0.126792252 | 1 |
| 0.465676985 | -0.107185472 | 0.000467492 | 0.005827837 | 1 |
| 0.465899438 | 0.208381474  | 0.584854032 | 0.102782106 | 1 |
| 0.465998662 | 0.229319749  | 1           | 0.242167012 | 1 |
| 0.465998662 | 0.229319749  | 1           | 0.242167012 | 1 |
| 0.465998662 | 0.229319749  | 1           | 0.242167012 | 1 |
| 0.466043002 | 0.239978177  | 0.439859057 | 1           | 1 |
| 0.466209213 | -0.246768017 | 1           | 0.704162183 | 1 |
| 0.466452534 | 0.248088065  | 1           | 1           | 1 |
| 0.466673284 | 0.225095688  | 0.307400178 | 0.850173656 | 1 |
| 0.466807187 | -0.216469492 | 0.584854032 | 0.145037597 | 1 |

|             |              |             |             |   |
|-------------|--------------|-------------|-------------|---|
| 0.466989544 | 0.148821487  | 0.075374611 | 0.005827837 | 1 |
| 0.467573838 | 0.122783322  | 0.001207877 | 0.017403168 | 1 |
| 0.467683382 | 0.247816342  | 1           | 1           | 1 |
| 0.467913206 | 0.139022778  | 0.004526275 | 0.031639242 | 1 |
| 0.467951681 | 0.243172109  | 1           | 0.645935818 | 1 |
| 0.467973309 | 0.23369964   | 0.439859057 | 1           | 1 |
| 0.468261937 | -0.239877877 | 1           | 0.489952655 | 1 |
| 0.468266012 | 0.24265958   | 1           | 0.645935818 | 1 |
| 0.4688553   | 0.197226288  | 0.439859057 | 0.060775899 | 1 |
| 0.4688553   | 0.197226288  | 0.439859057 | 0.060775899 | 1 |
| 0.4688553   | 0.197226288  | 0.439859057 | 0.060775899 | 1 |
| 0.469209204 | 0.167533273  | 0.026049691 | 0.129712192 | 1 |
| 0.469416764 | 0.134531574  | 0.043105813 | 0.002093839 | 1 |
| 0.469507602 | 0.245307678  | 1           | 0.850173656 | 1 |
| 0.469710068 | 0.233421786  | 1           | 0.397942841 | 1 |
| 0.469710068 | 0.233421786  | 1           | 0.397942841 | 1 |
| 0.470178651 | -0.24635388  | 1           | 1           | 1 |
| 0.470178651 | -0.24635388  | 1           | 1           | 1 |
| 0.470412472 | 0.126944605  | 0.001207877 | 0.02341474  | 1 |
| 0.4704229   | 0.240377897  | 1           | 0.601859652 | 1 |
| 0.470496827 | -0.245132936 | 0.881481882 | 1           | 1 |
| 0.470528767 | -0.183788276 | 0.043105813 | 0.242167012 | 1 |
| 0.470528767 | -0.183788276 | 0.043105813 | 0.242167012 | 1 |
| 0.470649968 | 0.234482741  | 1           | 0.416730107 | 1 |
| 0.470649968 | 0.234482741  | 1           | 0.416730107 | 1 |
| 0.470748203 | 0.097522575  | 0.004526275 | 0.000115129 | 1 |
| 0.470748203 | 0.097522575  | 0.004526275 | 0.000115129 | 1 |
| 0.470748203 | 0.097522575  | 0.004526275 | 0.000115129 | 1 |
| 0.470748203 | 0.097522575  | 0.004526275 | 0.000115129 | 1 |
| 0.471551018 | 0.212393395  | 0.19926681  | 0.645935818 | 1 |
| 0.471551018 | 0.212393395  | 0.19926681  | 0.645935818 | 1 |
| 0.471665609 | -0.17070918  | 0.205025676 | 0.02341474  | 1 |
| 0.471665609 | -0.17070918  | 0.205025676 | 0.02341474  | 1 |
| 0.471812445 | -0.225261665 | 0.989933981 | 0.242167012 | 1 |
| 0.47190201  | -0.244999735 | 0.989933981 | 1           | 1 |
| 0.471935818 | 0.229192108  | 1           | 0.364167203 | 1 |
| 0.472465711 | -0.233347687 | 1           | 0.416730107 | 1 |
| 0.473156068 | -0.135792252 | 0.004273917 | 0.031639242 | 1 |
| 0.473328997 | -0.234596967 | 1           | 0.489952655 | 1 |
| 0.473328997 | -0.234596967 | 1           | 0.489952655 | 1 |
| 0.474942184 | 0.04039601   | 9.36E-08    | 3.06E-06    | 1 |
| 0.474942184 | 0.04039601   | 9.36E-08    | 3.06E-06    | 1 |
| 0.474942184 | 0.04039601   | 9.36E-08    | 3.06E-06    | 1 |
| 0.474942184 | 0.04039601   | 9.36E-08    | 3.06E-06    | 1 |
| 0.474942184 | 0.04039601   | 9.36E-08    | 3.06E-06    | 1 |
| 0.474942184 | 0.04039601   | 9.36E-08    | 3.06E-06    | 1 |
| 0.474983321 | 0.230470359  | 1           | 0.397942841 | 1 |
| 0.475258984 | 0.167599739  | 0.030989574 | 0.145037597 | 1 |
| 0.475377726 | -0.150309467 | 0.095006685 | 0.006372161 | 1 |
| 0.475491676 | -0.176191992 | 0.035148121 | 0.164911511 | 1 |
| 0.475521313 | 0.200129277  | 0.439859057 | 0.085309726 | 1 |
| 0.475521313 | 0.200129277  | 0.439859057 | 0.085309726 | 1 |
| 0.475835068 | -0.088661566 | 0.002297238 | 4.69E-05    | 1 |
| 0.476020357 | -0.137938805 | 0.043105813 | 0.002420613 | 1 |
| 0.476020357 | -0.137938805 | 0.043105813 | 0.002420613 | 1 |
| 0.476020357 | -0.137938805 | 0.043105813 | 0.002420613 | 1 |
| 0.476068103 | -0.23603871  | 1           | 0.489952655 | 1 |
| 0.47641006  | 0.13979665   | 0.043105813 | 0.003736177 | 1 |
| 0.476472832 | -0.176593502 | 0.307400178 | 0.029310175 | 1 |
| 0.476959871 | 0.164243776  | 0.026049691 | 0.126792252 | 1 |
| 0.477082481 | -0.13068065  | 0.035148121 | 0.002093839 | 1 |
| 0.477082481 | -0.13068065  | 0.035148121 | 0.002093839 | 1 |
| 0.477244839 | -0.242055135 | 0.989933981 | 1           | 1 |
| 0.477324107 | 0.163598112  | 0.026049691 | 0.126792252 | 1 |

|             |              |             |             |   |
|-------------|--------------|-------------|-------------|---|
| 0.477324107 | 0.163598112  | 0.026049691 | 0.126792252 | 1 |
| 0.477334653 | -0.216432637 | 0.737584497 | 0.217058541 | 1 |
| 0.477615583 | -0.13528049  | 0.043105813 | 0.002420613 | 1 |
| 0.477615583 | -0.13528049  | 0.043105813 | 0.002420613 | 1 |
| 0.477830916 | 0.238628553  | 1           | 0.704162183 | 1 |
| 0.478070177 | 0.22116927   | 0.88322726  | 0.242167012 | 1 |
| 0.47821736  | -0.119737967 | 0.026049691 | 0.000997588 | 1 |
| 0.478360523 | -0.205948994 | 0.584854032 | 0.126792252 | 1 |
| 0.478883579 | -0.216845371 | 0.307400178 | 0.704162183 | 1 |
| 0.478883579 | -0.216845371 | 0.307400178 | 0.704162183 | 1 |
| 0.478883579 | -0.216845371 | 0.307400178 | 0.704162183 | 1 |
| 0.478883579 | -0.216845371 | 0.307400178 | 0.704162183 | 1 |
| 0.478934138 | 0.204314917  | 0.169239932 | 0.489952655 | 1 |
| 0.479571615 | 0.241313834  | 1           | 1           | 1 |
| 0.479621452 | -0.143724117 | 0.075374611 | 0.004171959 | 1 |
| 0.479676717 | -0.237546086 | 1           | 0.704162183 | 1 |
| 0.479743188 | 0.048841728  | 1.09E-06    | 1.04E-05    | 1 |
| 0.479795997 | 0.241041635  | 1           | 1           | 1 |
| 0.479795997 | 0.241041635  | 1           | 1           | 1 |
| 0.480078415 | -0.167208632 | 0.205025676 | 0.02341474  | 1 |
| 0.480078415 | -0.167208632 | 0.205025676 | 0.02341474  | 1 |
| 0.48008018  | 0.200680136  | 0.439859057 | 0.102782106 | 1 |
| 0.480382833 | -0.236400429 | 0.584854032 | 1           | 1 |
| 0.480653997 | 0.152332218  | 0.095538718 | 0.009270366 | 1 |
| 0.480772709 | -0.235970505 | 0.584854032 | 1           | 1 |
| 0.481372913 | -0.236142515 | 0.584854032 | 1           | 1 |
| 0.481556334 | -0.090850681 | 0.003169634 | 0.000108916 | 1 |
| 0.481698193 | 0.218391503  | 0.881481882 | 0.242167012 | 1 |
| 0.481778368 | 0.23099313   | 1           | 0.489952655 | 1 |
| 0.481780456 | 0.184607354  | 0.412603306 | 0.052574033 | 1 |
| 0.481780456 | 0.184607354  | 0.412603306 | 0.052574033 | 1 |
| 0.481780456 | 0.184607354  | 0.412603306 | 0.052574033 | 1 |
| 0.482348495 | 0.226097157  | 0.439859057 | 1           | 1 |
| 0.482500437 | -0.238762338 | 1           | 1           | 1 |
| 0.483368419 | -0.077697272 | 0.0008771   | 1.80E-05    | 1 |
| 0.483677749 | 0.223929832  | 1           | 0.364167203 | 1 |
| 0.483787907 | -0.039612232 | 4.58E-06    | 9.79E-08    | 1 |
| 0.483825897 | 0.238983209  | 1           | 1           | 1 |
| 0.483825897 | 0.238983209  | 1           | 1           | 1 |
| 0.483837748 | 0.227978315  | 1           | 0.416730107 | 1 |
| 0.483999653 | -0.238276984 | 0.989933981 | 1           | 1 |
| 0.484080638 | 0.237493834  | 1           | 0.850173656 | 1 |
| 0.484080638 | 0.237493834  | 1           | 0.850173656 | 1 |
| 0.484120864 | -0.238081946 | 1           | 1           | 1 |
| 0.484173322 | -0.203869546 | 0.584854032 | 0.126792252 | 1 |
| 0.484552204 | 0.234988024  | 1           | 0.704162183 | 1 |
| 0.48458539  | -0.23464364  | 0.647493563 | 1           | 1 |
| 0.48458539  | -0.23464364  | 0.647493563 | 1           | 1 |
| 0.484658796 | -0.211120152 | 0.737584497 | 0.164911511 | 1 |
| 0.484658796 | -0.211120152 | 0.737584497 | 0.164911511 | 1 |
| 0.485252213 | -0.211856624 | 0.295435331 | 0.704162183 | 1 |
| 0.48555675  | -0.180599177 | 0.043105813 | 0.242167012 | 1 |
| 0.485793454 | 0.227699682  | 0.439859057 | 1           | 1 |
| 0.485817168 | -0.181874914 | 0.066393258 | 0.242167012 | 1 |
| 0.485842438 | 0.110862626  | 0.0008771   | 0.009270366 | 1 |
| 0.485842438 | 0.110862626  | 0.0008771   | 0.009270366 | 1 |
| 0.48591529  | -0.098595872 | 0.008580492 | 0.000163543 | 1 |
| 0.485934474 | 0.128297117  | 0.003169634 | 0.025431136 | 1 |
| 0.485983061 | 0.199821125  | 0.169239932 | 0.489952655 | 1 |
| 0.485983061 | 0.199821125  | 0.169239932 | 0.489952655 | 1 |
| 0.486038239 | -0.145380083 | 0.087427713 | 0.006372161 | 1 |
| 0.486119611 | -0.197819539 | 0.146615922 | 0.489952655 | 1 |
| 0.486226855 | -0.228831499 | 0.439859057 | 1           | 1 |
| 0.486514111 | -0.23057264  | 1           | 0.489952655 | 1 |



|             |              |             |             |   |
|-------------|--------------|-------------|-------------|---|
| 0.486514111 | -0.23057264  | 1           | 0.489952655 | 1 |
| 0.48656918  | 0.198220319  | 0.439859057 | 0.102782106 | 1 |
| 0.48656918  | 0.198220319  | 0.439859057 | 0.102782106 | 1 |
| 0.48656918  | 0.198220319  | 0.439859057 | 0.102782106 | 1 |
| 0.486620045 | 0.116556356  | 0.001207877 | 0.011906673 | 1 |
| 0.486620045 | 0.116556356  | 0.001207877 | 0.011906673 | 1 |
| 0.486944534 | -0.220119187 | 0.412603306 | 1           | 1 |
| 0.487078583 | -0.053339274 | 6.77E-05    | 8.55E-07    | 1 |
| 0.487078583 | -0.053339274 | 6.77E-05    | 8.55E-07    | 1 |
| 0.487078583 | -0.053339274 | 6.77E-05    | 8.55E-07    | 1 |
| 0.487078583 | -0.053339274 | 6.77E-05    | 8.55E-07    | 1 |
| 0.487078583 | -0.053339274 | 6.77E-05    | 8.55E-07    | 1 |
| 0.487078583 | -0.053339274 | 6.77E-05    | 8.55E-07    | 1 |
| 0.487941655 | 0.232784664  | 0.584854032 | 1           | 1 |
| 0.48807817  | 0.165531628  | 0.205025676 | 0.02341474  | 1 |
| 0.48807817  | 0.165531628  | 0.205025676 | 0.02341474  | 1 |
| 0.488235508 | 0.232184709  | 1           | 0.704162183 | 1 |
| 0.488812177 | 0.21078244   | 0.295435331 | 0.704162183 | 1 |
| 0.488862393 | -0.21493632  | 0.881481882 | 0.242167012 | 1 |
| 0.489433503 | 0.185452688  | 0.412603306 | 0.060775899 | 1 |
| 0.48947916  | -0.181765905 | 0.412603306 | 0.053084396 | 1 |
| 0.489536534 | -0.190598137 | 0.095538718 | 0.416730107 | 1 |
| 0.48963645  | 0.203333247  | 0.19926681  | 0.601859652 | 1 |
| 0.489659727 | 0.159668271  | 0.192696374 | 0.017403168 | 1 |
| 0.489876567 | -0.147871657 | 0.095538718 | 0.006372161 | 1 |
| 0.489876567 | -0.147871657 | 0.095538718 | 0.006372161 | 1 |
| 0.490000957 | 0.046748636  | 1.09E-06    | 9.47E-06    | 1 |
| 0.490000957 | 0.046748636  | 1.09E-06    | 9.47E-06    | 1 |
| 0.490000957 | 0.046748636  | 1.09E-06    | 9.47E-06    | 1 |
| 0.490131114 | 0.104531943  | 0.010835964 | 0.000324671 | 1 |
| 0.490232396 | -0.155054667 | 0.169239932 | 0.011906673 | 1 |
| 0.490232396 | -0.155054667 | 0.169239932 | 0.011906673 | 1 |
| 0.490442822 | 0.233983979  | 0.881481882 | 1           | 1 |
| 0.490442822 | 0.233983979  | 0.881481882 | 1           | 1 |
| 0.490442822 | 0.233983979  | 0.881481882 | 1           | 1 |
| 0.490442822 | 0.233983979  | 0.881481882 | 1           | 1 |
| 0.490462752 | -0.212749981 | 0.307400178 | 0.850173656 | 1 |
| 0.490644546 | -0.235101286 | 1           | 1           | 1 |
| 0.490772177 | 0.190831909  | 0.095538718 | 0.416730107 | 1 |
| 0.490863689 | 0.214793902  | 0.881481882 | 0.242167012 | 1 |
| 0.491091928 | -0.230346258 | 0.584854032 | 1           | 1 |
| 0.491091928 | -0.230346258 | 0.584854032 | 1           | 1 |
| 0.49138931  | 0.09845277   | 0.000295301 | 0.003736177 | 1 |
| 0.491599744 | 0.216585095  | 0.412603306 | 1           | 1 |
| 0.492084092 | 0.062183453  | 1.22E-05    | 0.000115129 | 1 |
| 0.492279273 | 0.234333471  | 1           | 1           | 1 |
| 0.492408127 | -0.027736633 | 3.18E-07    | 9.50E-09    | 1 |
| 0.492704182 | 0.167823561  | 0.035148121 | 0.164911511 | 1 |
| 0.493672768 | -0.139283594 | 0.075374611 | 0.005827837 | 1 |
| 0.49418232  | -0.21426932  | 0.412603306 | 1           | 1 |
| 0.494263853 | 0.097929705  | 0.000467492 | 0.003736177 | 1 |
| 0.494263853 | 0.097929705  | 0.000467492 | 0.003736177 | 1 |
| 0.494878287 | -0.22802028  | 1           | 0.645935818 | 1 |
| 0.494924747 | -0.218506898 | 0.439859057 | 1           | 1 |
| 0.495005674 | -0.07595588  | 0.0008771   | 1.93E-05    | 1 |
| 0.495005674 | -0.07595588  | 0.0008771   | 1.93E-05    | 1 |
| 0.495213282 | 0.232703917  | 1           | 1           | 1 |
| 0.495213282 | 0.232703917  | 1           | 1           | 1 |
| 0.495213282 | 0.232703917  | 1           | 1           | 1 |
| 0.495213282 | 0.232703917  | 1           | 1           | 1 |
| 0.496066292 | 0.173805542  | 0.043105813 | 0.242167012 | 1 |
| 0.496066292 | 0.173805542  | 0.043105813 | 0.242167012 | 1 |
| 0.496503775 | 0.229930803  | 1           | 0.704162183 | 1 |
| 0.496611512 | 0.210150248  | 0.881481882 | 0.242167012 | 1 |

|             |              |             |             |   |
|-------------|--------------|-------------|-------------|---|
| 0.496655457 | -0.23000649  | 0.737584497 | 1           | 1 |
| 0.496926652 | 0.099145212  | 0.00974133  | 0.0002997   | 1 |
| 0.496990323 | 0.068812104  | 1.56E-05    | 0.0002997   | 1 |
| 0.497003194 | 0.129068552  | 0.043105813 | 0.002420613 | 1 |
| 0.497003194 | 0.129068552  | 0.043105813 | 0.002420613 | 1 |
| 0.497045794 | -0.231114881 | 1           | 1           | 1 |
| 0.497056707 | 0.192350406  | 0.439859057 | 0.102782106 | 1 |
| 0.497056707 | 0.192350406  | 0.439859057 | 0.102782106 | 1 |
| 0.497056707 | 0.192350406  | 0.439859057 | 0.102782106 | 1 |
| 0.497246421 | -0.18868056  | 0.095538718 | 0.416730107 | 1 |
| 0.497430782 | 0.214866603  | 0.412603306 | 1           | 1 |
| 0.497545222 | 0.184762774  | 0.439859057 | 0.066020955 | 1 |
| 0.497545222 | 0.184762774  | 0.439859057 | 0.066020955 | 1 |
| 0.497627767 | 0.143457327  | 0.095006685 | 0.006372161 | 1 |
| 0.497627767 | 0.143457327  | 0.095006685 | 0.006372161 | 1 |
| 0.497849183 | 0.165615265  | 0.205025676 | 0.025431136 | 1 |
| 0.497849183 | 0.165615265  | 0.205025676 | 0.025431136 | 1 |
| 0.497849183 | 0.165615265  | 0.205025676 | 0.025431136 | 1 |
| 0.498000035 | 0.035378264  | 9.36E-08    | 3.06E-06    | 1 |
| 0.498162109 | -0.231178166 | 1           | 1           | 1 |
| 0.498175854 | 0.223103315  | 1           | 0.489952655 | 1 |
| 0.498175854 | 0.223103315  | 1           | 0.489952655 | 1 |
| 0.498235472 | 0.113212568  | 0.001207877 | 0.011906673 | 1 |
| 0.498438848 | -0.025808173 | 1.10E-07    | 6.53E-09    | 1 |
| 0.498438848 | -0.025808173 | 1.10E-07    | 6.53E-09    | 1 |
| 0.498438848 | -0.025808173 | 1.10E-07    | 6.53E-09    | 1 |
| 0.498438848 | -0.025808173 | 1.10E-07    | 6.53E-09    | 1 |
| 0.498819713 | -0.224553856 | 0.584854032 | 1           | 1 |
| 0.498819713 | -0.224553856 | 0.584854032 | 1           | 1 |
| 0.498925511 | 0.106080984  | 0.0008771   | 0.006372161 | 1 |
| 0.498925511 | 0.106080984  | 0.0008771   | 0.006372161 | 1 |
| 0.498925511 | 0.106080984  | 0.0008771   | 0.006372161 | 1 |
| 0.498925511 | 0.106080984  | 0.0008771   | 0.006372161 | 1 |
| 0.498958608 | 0.211808976  | 0.88322726  | 0.242167012 | 1 |
| 0.49924584  | 0.150434567  | 0.018394332 | 0.085309726 | 1 |
