# Supplementary material for: Effects of a short‐term cold exposure on circulating microRNAs and metabolic parameters in healthy adult subjects
Source: PubMed Central journal article supplement (PMC8743656; doi:10.1111/jcmm.17121), 2021-12-17
Supplement: JCMM-26-548-s004.pdf [file JCMM-26-548-s004.pdf]

**miRNA-miRNA and miRNA-analyte correlation analysis using GeneNet.** Col 1 and 2, interacting molecule pairs; col 3, pvalue of interaction; col 4, qvalue of interaction; col 5, probability of non-zero correlation; col 6, magnitude of partial correlation.

| node1_name    | node2_name    | pval        | qval        | prob        | pcor         |
|---------------|---------------|-------------|-------------|-------------|--------------|
| copeptin      | norepi        | 2.22E-16    | 1.72E-13    | 1           | -0.297419208 |
| mir-375       | copeptin      | 2.22E-16    | 1.72E-13    | 1           | -0.230443519 |
| mir-143-3p    | norepi        | 3.60E-11    | 1.39E-08    | 0.999999839 | -0.184491815 |
| mir-584-5p    | mir-150-5p    | 1.34E-10    | 4.39E-08    | 0.999998393 | -0.179073524 |
| mir-10b-5p    | mir-148a-3p   | 3.93E-10    | 1.22E-07    | 0.999991047 | -0.174531652 |
| mir-143-3p    | mir-139-5p    | 6.87E-09    | 1.74E-06    | 0.999991047 | -0.161801616 |
| mir-543       | mir-23a-3p    | 1.32E-08    | 2.83E-06    | 0.999991047 | -0.158772285 |
| mir-10a-5p    | cpeptide      | 1.91E-08    | 3.60E-06    | 0.99995857  | -0.15699184  |
| mir-150-5p    | norepi        | 7.51E-08    | 1.26E-05    | 0.999899318 | -0.150335172 |
| mir-375       | mir-15b-5p    | 2.93E-07    | 3.87E-05    | 0.999798078 | -0.14340744  |
| mir-532-5p    | mir-15b-5p    | 3.58E-07    | 4.53E-05    | 0.999708645 | -0.142358135 |
| mir-143-3p    | cpeptide      | 5.66E-07    | 6.61E-05    | 0.999659387 | -0.139937294 |
| mir-182-5p    | copeptin      | 7.55E-07    | 8.43E-05    | 0.999460555 | -0.138387135 |
| mir-125b-1-5p | mir-28-3p     | 1.43E-06    | 0.000141185 | 0.999419599 | -0.134892336 |
| mir-28-3p     | mir-125b-2-5p | 1.43E-06    | 0.000141185 | 0.999419599 | -0.134892336 |
| mir-23a-3p    | norepi        | 1.44E-06    | 0.000141698 | 0.999318852 | -0.134865788 |
| mir-423-5p    | mir-30a-5p    | 1.55E-06    | 0.000150127 | 0.998742191 | -0.134458433 |
| mir-151a-5p   | mir-27a-3p    | 2.08E-06    | 0.000193493 | 0.998742191 | -0.132819394 |
| mir-223-3p    | mir-30a-5p    | 3.03E-06    | 0.000267028 | 0.998262818 | -0.130684257 |
| mir-140-5p    | copeptin      | 3.60E-06    | 0.000308316 | 0.998262818 | -0.129698506 |
| mir-484       | norepi        | 3.76E-06    | 0.000319524 | 0.99622014  | -0.129447962 |
| mir-151a-5p   | mir-320a      | 7.22E-06    | 0.000569203 | 0.99622014  | -0.125641187 |
| mir-143-3p    | mir-125a-5p   | 7.76E-06    | 0.000605349 | 0.99622014  | -0.125208968 |
| mir-151a-5p   | mir-99a-5p    | 9.44E-06    | 0.000711559 | 0.99622014  | -0.124041531 |
| mir-125a-5p   | mir-28-3p     | 9.85E-06    | 0.000736432 | 0.995593229 | -0.123786608 |
| mir-3615      | mir-143-3p    | 2.01E-05    | 0.00130795  | 0.992577293 | -0.119442451 |
| mir-378a-3p   | mir-543       | 2.04E-05    | 0.001323757 | 0.992577293 | -0.119351742 |
| mir-584-5p    | mir-30a-5p    | 2.37E-05    | 0.001496388 | 0.992577293 | -0.118408001 |
| mir-146b-5p   | cpeptide      | 4.07E-05    | 0.002398151 | 0.982543506 | -0.114969917 |
| mir-29a-3p    | mir-320a      | 4.82E-05    | 0.002768282 | 0.981704382 | -0.113881163 |
| mir-140-5p    | mir-1307-3p   | 5.43E-05    | 0.003062152 | 0.981704382 | -0.113099463 |
| mir-99b-5p    | mir-28-3p     | 6.04E-05    | 0.003343869 | 0.981704382 | -0.112400303 |
| mir-191-5p    | mir-30a-5p    | 7.66E-05    | 0.004041733 | 0.981704382 | -0.110830093 |
| mir-106b-3p   | mir-28-5p     | 9.49E-05    | 0.004756046 | 0.981704382 | -0.109395417 |
| mir-224-5p    | mir-375       | 9.93E-05    | 0.004918487 | 0.981704382 | -0.109087318 |
| mir-143-3p    | mir-150-5p    | 0.000102328 | 0.005025586 | 0.981704382 | -0.108887272 |
| mir-3615      | mir-148b-3p   | 0.000116501 | 0.00556712  | 0.973438204 | -0.108006016 |
| mir-361-5p    | mir-423-5p    | 0.000134754 | 0.006234632 | 0.973438204 | -0.107009187 |
| mir-148b-3p   | cpeptide      | 0.000138917 | 0.006380961 | 0.973438204 | -0.106799747 |
| mir-223-3p    | mir-28-3p     | 0.000152913 | 0.00685788  | 0.973438204 | -0.106136425 |
| mir-151a-3p   | cpeptide      | 0.000172998 | 0.007504179 | 0.973438204 | -0.105278039 |
| mir-543       | mir-92a-1-3p  | 0.000183461 | 0.007824328 | 0.973438204 | -0.104867364 |
| mir-92a-2-3p  | mir-543       | 0.000183461 | 0.007824328 | 0.973438204 | -0.104867364 |
| mir-181b-2-5p | mir-3615      | 0.000189607 | 0.008007419 | 0.973438204 | -0.104636272 |
| mir-3615      | mir-181b-1-5p | 0.000189607 | 0.008007419 | 0.973438204 | -0.104636272 |
| mir-150-5p    | mir-30e-5p    | 0.000195512 | 0.008180014 | 0.973438204 | -0.104420745 |
| mir-139-5p    | copeptin      | 0.000221495 | 0.008983487 | 0.964275405 | -0.103539715 |
| mir-543       | let-7g-5p     | 0.000234181 | 0.009363153 | 0.964275405 | -0.10314426  |
| mir-182-5p    | mir-425-5p    | 0.000250574 | 0.009838088 | 0.964275405 | -0.102661974 |
| mir-27b-3p    | mir-423-5p    | 0.000256353 | 0.010001478 | 0.964275405 | -0.102498965 |
| mir-148b-3p   | mir-375       | 0.000260738 | 0.010124076 | 0.964275405 | -0.102377567 |
| mir-17-5p     | mir-10b-5p    | 0.000279683 | 0.010640563 | 0.964275405 | -0.101874161 |
| mir-10b-5p    | mir-15b-5p    | 0.000334799 | 0.01203127  | 0.964275405 | -0.100572715 |
| mir-25-3p     | cpeptide      | 0.000361026 | 0.012640295 | 0.964275405 | -0.100022461 |
| mir-222-3p    | mir-199a-1-5p | 0.000376775 | 0.012991184 | 0.960980372 | -0.099709731 |
| mir-222-3p    | mir-199a-2-5p | 0.000376775 | 0.012991184 | 0.960980372 | -0.099709731 |
| mir-98-5p     | mir-106a-5p   | 0.000409208 | 0.013772801 | 0.939827895 | -0.099102419 |
| mir-629-5p    | mir-15b-5p    | 0.000454264 | 0.014954794 | 0.91917994  | -0.098329336 |

|               |               |             |             |             |              |
|---------------|---------------|-------------|-------------|-------------|--------------|
| mir-22-3p     | copeptin      | 0.000525321 | 0.016807571 | 0.91917994  | -0.097244556 |
| mir-150-5p    | mir-28-3p     | 0.000530014 | 0.016926286 | 0.91917994  | -0.097177811 |
| mir-30d-5p    | copeptin      | 0.00061104  | 0.018942203 | 0.910181536 | -0.096104686 |
| mir-15a-5p    | cpeptide      | 0.000668731 | 0.020325901 | 0.910181536 | -0.095418527 |
| mir-10b-5p    | mir-423-3p    | 0.000693645 | 0.020906913 | 0.910181536 | -0.095139063 |
| mir-148a-3p   | mir-15b-5p    | 0.00071583  | 0.02141614  | 0.910181536 | -0.094897958 |
| let-7g-5p     | copeptin      | 0.000755201 | 0.022316501 | 0.897874621 | -0.094486659 |
| mir-1307-3p   | let-7g-5p     | 0.000864596 | 0.024765261 | 0.897874621 | -0.093440276 |
| mir-182-5p    | mir-139-5p    | 0.000915617 | 0.025856671 | 0.897874621 | -0.092993633 |
| mir-19b-2-3p  | mir-30a-5p    | 0.000960143 | 0.026784306 | 0.897874621 | -0.092622282 |
| mir-19b-1-3p  | mir-30a-5p    | 0.000960143 | 0.026784306 | 0.897874621 | -0.092622282 |
| mir-17-5p     | norepi        | 0.00106917  | 0.028963176 | 0.897874621 | -0.091776237 |
| mir-543       | cpeptide      | 0.001124035 | 0.030012641 | 0.897874621 | -0.091380245 |
| mir-143-3p    | mir-484       | 0.001131357 | 0.030150431 | 0.897874621 | -0.091328753 |
| mir-423-3p    | mir-10a-5p    | 0.001326346 | 0.033752157 | 0.889132582 | -0.090059655 |
| mir-584-5p    | mir-224-5p    | 0.00137439  | 0.034593262 | 0.889132582 | -0.08977351  |
| mir-29a-3p    | let-7i-5p     | 0.001385343 | 0.034782461 | 0.889132582 | -0.089709565 |
| mir-148a-3p   | mir-20b-5p    | 0.001444138 | 0.035782213 | 0.889132582 | -0.089374076 |
| mir-451a      | mir-363-3p    | 0.001446175 | 0.035816391 | 0.889132582 | 0.089362676  |
| mir-425-5p    | mir-103a-1-3p | 0.001438495 | 0.035687403 | 0.889132582 | 0.089405724  |
| mir-103a-2-3p | mir-425-5p    | 0.001438495 | 0.035687403 | 0.889132582 | 0.089405724  |
| mir-181b-2-5p | mir-30a-5p    | 0.001387986 | 0.034827976 | 0.889132582 | 0.089694204  |
| mir-181b-1-5p | mir-30a-5p    | 0.001387986 | 0.034827976 | 0.889132582 | 0.089694204  |
| mir-340-5p    | mir-30c-1-5p  | 0.00138023  | 0.034694259 | 0.889132582 | 0.089739357  |
| mir-340-5p    | mir-30c-2-5p  | 0.00138023  | 0.034694259 | 0.889132582 | 0.089739357  |
| mir-378a-3p   | let-7g-5p     | 0.001345642 | 0.034092182 | 0.889132582 | 0.089943604  |
| mir-139-5p    | cpeptide      | 0.001309933 | 0.033460539 | 0.889132582 | 0.090159604  |
| mir-15a-5p    | mir-92a-1-3p  | 0.001289442 | 0.033093355 | 0.889132582 | 0.09028602   |
| mir-92a-2-3p  | mir-15a-5p    | 0.001289442 | 0.033093355 | 0.889132582 | 0.09028602   |
| mir-10b-5p    | mir-27a-3p    | 0.001254158 | 0.032452878 | 0.889132582 | 0.090508098  |
| mir-361-5p    | mir-224-5p    | 0.001149673 | 0.030492808 | 0.889132582 | 0.091201282  |
| mir-224-5p    | mir-150-5p    | 0.001147067 | 0.030444295 | 0.897874621 | 0.091219303  |
| let-7d-5p     | mir-30a-5p    | 0.001120285 | 0.029941872 | 0.897874621 | 0.091406736  |
| mir-378a-3p   | mir-99a-5p    | 0.001097403 | 0.029507018 | 0.897874621 | 0.091570175  |
| mir-182-5p    | mir-140-5p    | 0.00108625  | 0.029293135 | 0.897874621 | 0.091650991  |
| mir-584-5p    | mir-423-5p    | 0.001071374 | 0.029005918 | 0.897874621 | 0.091759974  |
| mir-378a-3p   | mir-28-5p     | 0.001025574 | 0.028107217 | 0.897874621 | 0.092104522  |
| mir-103a-2-3p | let-7g-5p     | 0.001012542 | 0.027847453 | 0.897874621 | 0.092205159  |
| mir-103a-1-3p | let-7g-5p     | 0.001012542 | 0.027847453 | 0.897874621 | 0.092205159  |
| mir-23a-3p    | mir-221-3p    | 0.000980828 | 0.027207598 | 0.897874621 | 0.092455165  |
| mir-26b-5p    | mir-143-3p    | 0.000968451 | 0.0269549   | 0.897874621 | 0.092554761  |
| mir-143-3p    | mir-374b-5p   | 0.000880412 | 0.025106916 | 0.897874621 | 0.093299266  |
| mir-151a-3p   | mir-28-3p     | 0.000859866 | 0.024662494 | 0.897874621 | 0.093482911  |
| mir-27b-3p    | mir-199a-1-5p | 0.000859232 | 0.024648694 | 0.897874621 | 0.093488644  |
| mir-27b-3p    | mir-199a-2-5p | 0.000859232 | 0.024648694 | 0.897874621 | 0.093488644  |
| mir-126-5p    | cpeptide      | 0.000845339 | 0.024345159 | 0.897874621 | 0.093615225  |
| mir-629-5p    | mir-106b-3p   | 0.000841021 | 0.024250334 | 0.897874621 | 0.09365496   |
| mir-423-3p    | mir-1307-3p   | 0.000738301 | 0.021924319 | 0.897874621 | 0.094660712  |
| mir-29a-3p    | mir-223-3p    | 0.000735023 | 0.021850657 | 0.910181536 | 0.0946949    |
| mir-222-3p    | copeptin      | 0.000718564 | 0.021478377 | 0.910181536 | 0.094868725  |
| mir-423-5p    | mir-191-5p    | 0.00069573  | 0.020955092 | 0.910181536 | 0.095116102  |
| mir-378a-3p   | mir-99b-5p    | 0.000686306 | 0.02073677  | 0.910181536 | 0.095220406  |
| mir-151a-5p   | mir-30e-5p    | 0.000682958 | 0.020658885 | 0.910181536 | 0.095257777  |
| mir-139-5p    | let-7d-3p     | 0.000639312 | 0.019627118 | 0.910181536 | 0.095761239  |
| mir-28-5p     | mir-15b-5p    | 0.000613663 | 0.019006323 | 0.910181536 | 0.096072201  |
| mir-125a-5p   | mir-543       | 0.000564638 | 0.017788635 | 0.910181536 | 0.096701771  |
| mir-29a-3p    | mir-151a-5p   | 0.00056416  | 0.017776903 | 0.91917994  | 0.096708148  |
| mir-361-5p    | mir-30a-5p    | 0.000548138 | 0.017380599 | 0.91917994  | 0.096925139  |
| mir-223-3p    | mir-23a-3p    | 0.000535026 | 0.017052569 | 0.91917994  | 0.097107144  |
| mir-140-5p    | mir-148b-3p   | 0.000496416 | 0.016066623 | 0.91917994  | 0.097668272  |
| mir-22-3p     | mir-30c-1-5p  | 0.000475834 | 0.01552845  | 0.91917994  | 0.097984245  |
| mir-22-3p     | mir-30c-2-5p  | 0.000475834 | 0.01552845  | 0.91917994  | 0.097984245  |
| mir-543       | mir-221-3p    | 0.000434417 | 0.01441797  | 0.91917994  | 0.098660636  |
| mir-99b-5p    | mir-150-5p    | 0.000430491 | 0.014318674 | 0.939827895 | 0.098727841  |

|               |               |             |             |             |             |
|---------------|---------------|-------------|-------------|-------------|-------------|
| mir-140-5p    | mir-125a-5p   | 0.00041635  | 0.013957426 | 0.939827895 | 0.098974734 |
| mir-1307-3p   | mir-122-5p    | 0.000395636 | 0.01341788  | 0.939827895 | 0.099350882 |
| mir-17-5p     | mir-93-5p     | 0.000390009 | 0.013292046 | 0.960980372 | 0.099456244 |
| mir-148b-3p   | mir-186-5p    | 0.000383634 | 0.013147997 | 0.960980372 | 0.099577327 |
| mir-148b-3p   | mir-27a-3p    | 0.000375307 | 0.01295893  | 0.964275405 | 0.099738359 |
| mir-106a-5p   | mir-378a-3p   | 0.000367195 | 0.01277903  | 0.964275405 | 0.099898467 |
| mir-126-5p    | mir-10a-5p    | 0.000362089 | 0.012664317 | 0.964275405 | 0.100000958 |
| mir-194-2-5p  | mir-30a-5p    | 0.000361001 | 0.012639729 | 0.964275405 | 0.100022968 |
| mir-194-1-5p  | mir-30a-5p    | 0.000361001 | 0.012639729 | 0.964275405 | 0.100022968 |
| mir-98-5p     | let-7d-5p     | 0.000334034 | 0.012013043 | 0.964275405 | 0.100589344 |
| mir-27a-3p    | mir-10a-5p    | 0.000328869 | 0.011889109 | 0.964275405 | 0.100702679 |
| mir-140-5p    | cpeptide      | 0.00031477  | 0.011544108 | 0.964275405 | 0.101020747 |
| mir-543       | mir-128-2-3p  | 0.000311812 | 0.011470465 | 0.964275405 | 0.101089156 |
| mir-128-1-3p  | mir-543       | 0.000311812 | 0.011470465 | 0.964275405 | 0.101089156 |
| mir-30d-5p    | mir-128-1-3p  | 0.000306814 | 0.011344976 | 0.964275405 | 0.101206166 |
| mir-30d-5p    | mir-128-2-3p  | 0.000306814 | 0.011344976 | 0.964275405 | 0.101206166 |
| mir-148a-3p   | mir-378a-3p   | 0.000287822 | 0.010856122 | 0.964275405 | 0.101667617 |
| mir-423-5p    | mir-375       | 0.000284732 | 0.01077473  | 0.964275405 | 0.101745373 |
| mir-181a-2-5p | mir-224-5p    | 0.000278725 | 0.010614969 | 0.964275405 | 0.101898818 |
| mir-224-5p    | mir-181a-1-5p | 0.000278725 | 0.010614969 | 0.964275405 | 0.101898818 |
| mir-425-5p    | mir-423-5p    | 0.000260262 | 0.01011083  | 0.964275405 | 0.102390647 |
| mir-143-3p    | mir-27a-3p    | 0.000258273 | 0.01005529  | 0.964275405 | 0.102445585 |
| mir-146b-5p   | mir-10a-5p    | 0.000252299 | 0.009887093 | 0.964275405 | 0.102612934 |
| mir-361-5p    | mir-151a-5p   | 0.000233697 | 0.009348889 | 0.964275405 | 0.103158951 |
| mir-27a-3p    | cpeptide      | 0.000225452 | 0.00910308  | 0.964275405 | 0.103414135 |
| mir-199a-2-3p | mir-199a-1-3p | 0.000198336 | 0.008261414 | 0.964275405 | 0.104319837 |
| mir-199a-2-3p | mir-199b-3p   | 0.000198336 | 0.008261414 | 0.964275405 | 0.104319837 |
| mir-199a-1-3p | mir-199b-3p   | 0.000198336 | 0.008261414 | 0.964275405 | 0.104319837 |
| mir-181b-2-5p | mir-224-5p    | 0.000186436 | 0.007913423 | 0.973438204 | 0.104754584 |
| mir-181b-1-5p | mir-224-5p    | 0.000186436 | 0.007913423 | 0.973438204 | 0.104754584 |
| mir-22-3p     | mir-151a-5p   | 0.000183821 | 0.007835145 | 0.973438204 | 0.104853637 |
| let-7i-5p     | let-7g-5p     | 0.000174539 | 0.007552009 | 0.973438204 | 0.105216122 |
| mir-223-3p    | mir-126-5p    | 0.000171856 | 0.007468556 | 0.973438204 | 0.105324287 |
| mir-584-5p    | let-7d-5p     | 0.000170671 | 0.007431455 | 0.973438204 | 0.105372577 |
| mir-182-5p    | norepi        | 0.000127788 | 0.005984957 | 0.973438204 | 0.107373683 |
| mir-484       | mir-15b-5p    | 0.000117561 | 0.00560707  | 0.973438204 | 0.107944248 |
| mir-584-5p    | mir-28-5p     | 0.0001127   | 0.00542258  | 0.973438204 | 0.108231983 |
| mir-143-3p    | mir-224-5p    | 0.000104182 | 0.005091269 | 0.973438204 | 0.108765731 |
| mir-1307-3p   | mir-28-5p     | 0.000103809 | 0.005078133 | 0.981704382 | 0.108789969 |
| mir-224-5p    | mir-543       | 8.98E-05    | 0.004565098 | 0.981704382 | 0.109765399 |
| mir-103a-2-3p | mir-28-3p     | 8.94E-05    | 0.004546759 | 0.981704382 | 0.109801407 |
| mir-103a-1-3p | mir-28-3p     | 8.94E-05    | 0.004546759 | 0.981704382 | 0.109801407 |
| mir-1307-3p   | norepi        | 8.11E-05    | 0.004223165 | 0.981704382 | 0.110451779 |
| mir-17-5p     | mir-140-5p    | 7.93E-05    | 0.004152568 | 0.981704382 | 0.110597732 |
| mir-101-1-3p  | mir-101-2-3p  | 7.74E-05    | 0.00407425  | 0.981704382 | 0.110761504 |
| mir-29a-3p    | mir-143-3p    | 7.48E-05    | 0.003964951 | 0.981704382 | 0.110993478 |
| mir-363-3p    | copeptin      | 7.27E-05    | 0.003880632 | 0.981704382 | 0.1111753   |
| mir-107       | mir-28-5p     | 7.24E-05    | 0.003867023 | 0.981704382 | 0.111204889 |
| mir-1307-3p   | mir-543       | 6.65E-05    | 0.003611669 | 0.981704382 | 0.1117735   |
| mir-139-5p    | mir-20b-5p    | 6.52E-05    | 0.003558211 | 0.981704382 | 0.111895973 |
| mir-194-2-5p  | mir-122-5p    | 4.71E-05    | 0.002718163 | 0.982543506 | 0.114021839 |
| mir-122-5p    | mir-194-1-5p  | 4.71E-05    | 0.002718163 | 0.982543506 | 0.114021839 |
| mir-148a-3p   | let-7g-5p     | 4.47E-05    | 0.002599533 | 0.982543506 | 0.114362796 |
| mir-28-3p     | cpeptide      | 3.47E-05    | 0.002085935 | 0.982543506 | 0.11599545  |
| mir-223-3p    | mir-15b-5p    | 3.13E-05    | 0.001904269 | 0.982543506 | 0.116650337 |
| mir-584-5p    | mir-629-5p    | 2.92E-05    | 0.001789435 | 0.982965503 | 0.117092492 |
| mir-19b-2-3p  | mir-139-5p    | 2.58E-05    | 0.001601665 | 0.982965503 | 0.117868931 |
| mir-19b-1-3p  | mir-139-5p    | 2.58E-05    | 0.001601665 | 0.982965503 | 0.117868931 |
| mir-224-5p    | mir-24-2-3p   | 2.56E-05    | 0.001593884 | 0.992577293 | 0.117907946 |
| mir-224-5p    | mir-24-1-3p   | 2.56E-05    | 0.001593884 | 0.992577293 | 0.117907946 |
| mir-27a-3p    | mir-126-5p    | 2.12E-05    | 0.001370651 | 0.992577293 | 0.119087155 |
| mir-148a-3p   | mir-148b-3p   | 1.62E-05    | 0.001095487 | 0.992577293 | 0.12074868  |
| mir-374b-5p   | cpeptide      | 1.61E-05    | 0.001087397 | 0.995593229 | 0.120809225 |
| mir-122-5p    | mir-378a-3p   | 1.58E-05    | 0.00107232  | 0.995593229 | 0.120922808 |

|               |               |          |             |             |             |
|---------------|---------------|----------|-------------|-------------|-------------|
| mir-29a-3p    | mir-139-5p    | 1.54E-05 | 0.001054796 | 0.995593229 | 0.121056057 |
| mir-150-5p    | mir-30a-5p    | 1.53E-05 | 0.001048058 | 0.995593229 | 0.121107662 |
| mir-425-5p    | norepi        | 1.37E-05 | 0.000961075 | 0.995593229 | 0.121793644 |
| let-7i-5p     | copeptin      | 1.33E-05 | 0.000938256 | 0.995593229 | 0.12198027  |
| mir-182-5p    | mir-150-5p    | 1.30E-05 | 0.000921045 | 0.995593229 | 0.122123046 |
| mir-148b-3p   | norepi        | 1.20E-05 | 0.000863742 | 0.995593229 | 0.12261194  |
| mir-451a      | copeptin      | 9.51E-06 | 0.000715655 | 0.99622014  | 0.123999121 |
| mir-27b-3p    | mir-148a-3p   | 8.98E-06 | 0.000683383 | 0.99622014  | 0.124338094 |
| mir-148b-3p   | mir-126-5p    | 8.27E-06 | 0.000638647 | 0.99622014  | 0.124827738 |
| mir-151a-5p   | mir-28-5p     | 6.86E-06 | 0.00054509  | 0.99622014  | 0.12594141  |
| mir-543       | mir-28-3p     | 6.67E-06 | 0.000532107 | 0.99622014  | 0.126107352 |
| let-7i-5p     | mir-30d-5p    | 5.43E-06 | 0.000445048 | 0.99622014  | 0.127311922 |
| mir-29a-3p    | mir-99a-5p    | 3.30E-06 | 0.000286964 | 0.998262818 | 0.130194977 |
| mir-223-3p    | mir-28-5p     | 2.89E-06 | 0.000256803 | 0.998262818 | 0.130946174 |
| mir-29a-3p    | norepi        | 2.36E-06 | 0.000215285 | 0.998262818 | 0.132102268 |
| mir-126-3p    | mir-27a-3p    | 2.24E-06 | 0.000206419 | 0.998742191 | 0.132387064 |
| mir-222-3p    | mir-30a-5p    | 2.01E-06 | 0.000188349 | 0.998742191 | 0.132997614 |
| mir-425-5p    | mir-30a-5p    | 1.18E-06 | 0.000121434 | 0.999419599 | 0.135964968 |
| mir-15b-5p    | copeptin      | 1.17E-06 | 0.000120429 | 0.999419599 | 0.136022553 |
| mir-1307-3p   | mir-28-3p     | 1.01E-06 | 0.000107178 | 0.999419599 | 0.136815738 |
| mir-143-3p    | mir-148b-3p   | 8.77E-07 | 9.55E-05    | 0.999419599 | 0.137574775 |
| mir-99b-5p    | norepi        | 8.50E-07 | 9.31E-05    | 0.999460555 | 0.137744667 |
| mir-10b-5p    | mir-143-3p    | 6.17E-07 | 7.09E-05    | 0.999460555 | 0.139476172 |
| mir-192-5p    | mir-148a-3p   | 6.13E-07 | 7.05E-05    | 0.999659387 | 0.139505939 |
| mir-30a-5p    | mir-28-3p     | 4.52E-07 | 5.50E-05    | 0.999659387 | 0.14113032  |
| mir-378a-3p   | cpeptide      | 4.18E-07 | 5.16E-05    | 0.999708645 | 0.141536366 |
| mir-222-3p    | mir-10a-5p    | 3.48E-07 | 4.43E-05    | 0.999798078 | 0.142510287 |
| mir-148a-3p   | mir-99a-5p    | 2.80E-07 | 3.74E-05    | 0.999841197 | 0.143642366 |
| mir-223-3p    | mir-151a-5p   | 2.64E-07 | 3.57E-05    | 0.999841197 | 0.143954984 |
| mir-182-5p    | mir-30a-5p    | 2.48E-07 | 3.41E-05    | 0.999841197 | 0.144264148 |
| mir-423-5p    | cpeptide      | 2.38E-07 | 3.30E-05    | 0.999841197 | 0.144478038 |
| mir-27b-3p    | mir-148b-3p   | 1.93E-07 | 2.78E-05    | 0.999841197 | 0.145563001 |
| mir-375       | mir-10a-5p    | 1.39E-07 | 2.11E-05    | 0.999841197 | 0.147228115 |
| mir-139-5p    | mir-28-3p     | 1.38E-07 | 2.09E-05    | 0.999899318 | 0.147292975 |
| mir-29a-3p    | copeptin      | 1.23E-07 | 1.91E-05    | 0.999899318 | 0.147866205 |
| mir-29a-3p    | mir-10b-5p    | 1.21E-07 | 1.89E-05    | 0.999899318 | 0.147939162 |
| mir-19b-2-3p  | mir-19b-1-3p  | 9.01E-08 | 1.47E-05    | 0.999899318 | 0.1494278   |
| mir-10b-5p    | mir-10a-5p    | 7.13E-08 | 1.20E-05    | 0.999899318 | 0.15059406  |
| mir-10b-5p    | mir-150-5p    | 2.58E-08 | 4.71E-06    | 0.999899318 | 0.155559485 |
| mir-24-2-3p   | mir-24-1-3p   | 1.90E-08 | 3.58E-06    | 0.999991047 | 0.157032051 |
| mir-7-3-5p    | mir-7-1-5p    | 1.86E-08 | 3.54E-06    | 0.999991047 | 0.157131434 |
| mir-7-3-5p    | mir-7-2-5p    | 1.86E-08 | 3.54E-06    | 0.999991047 | 0.157131434 |
| mir-7-1-5p    | mir-7-2-5p    | 1.86E-08 | 3.54E-06    | 0.999991047 | 0.157131434 |
| mir-224-5p    | cpeptide      | 1.83E-08 | 3.50E-06    | 0.999991047 | 0.157212206 |
| mir-375       | mir-23a-3p    | 1.06E-08 | 2.43E-06    | 0.999991047 | 0.159792154 |
| mir-10b-5p    | mir-375       | 8.37E-09 | 2.04E-06    | 0.999991047 | 0.160886566 |
| mir-143-3p    | mir-28-3p     | 7.81E-09 | 1.93E-06    | 0.999991047 | 0.161208443 |
| mir-192-5p    | mir-122-5p    | 7.12E-09 | 1.79E-06    | 0.999991047 | 0.161637169 |
| mir-29a-3p    | mir-375       | 5.50E-09 | 1.45E-06    | 0.999991047 | 0.162826651 |
| mir-125a-5p   | mir-99b-5p    | 1.28E-10 | 4.22E-08    | 0.999999775 | 0.179270937 |
| mir-92a-2-3p  | mir-92a-1-3p  | 6.18E-11 | 2.26E-08    | 0.999999775 | 0.18228403  |
| mir-29a-3p    | mir-425-5p    | 2.36E-11 | 9.63E-09    | 0.999999901 | 0.186184476 |
| mir-103a-2-3p | mir-103a-1-3p | 4.08E-12 | 1.81E-09    | 0.999999901 | 0.193101041 |
| mir-30a-5p    | mir-10a-5p    | 3.88E-12 | 1.74E-09    | 0.999999991 | 0.193294312 |
| mir-122-5p    | mir-148a-3p   | 1.13E-12 | 5.87E-10    | 0.999999991 | 0.197975543 |
| mir-128-1-3p  | mir-128-2-3p  | 3.53E-13 | 1.99E-10    | 0.999999995 | 0.202321925 |
| mir-122-5p    | mir-99a-5p    | 2.98E-14 | 1.85E-11    | 0.999999998 | 0.211217509 |
| copeptin      | cpeptide      | 2.93E-14 | 1.82E-11    | 1           | 0.211284404 |
| mir-199a-1-5p | mir-199a-2-5p | 2.22E-16 | 1.72E-13    | 1           | 0.227023917 |
| mir-194-2-5p  | mir-194-1-5p  | 2.22E-16 | 1.72E-13    | 1           | 0.260885657 |
| mir-181a-2-5p | mir-181a-1-5p | 2.22E-16 | 1.72E-13    | 1           | 0.282061521 |
| mir-30c-1-5p  | mir-30c-2-5p  | 2.22E-16 | 1.72E-13    | 1           | 0.341583471 |
| mir-125b-1-5p | mir-125b-2-5p | 2.22E-16 | 1.72E-13    | 1           | 0.489262878 |
| mir-181b-2-5p | mir-181b-1-5p | 2.22E-16 | 1.72E-13    | 1           | 0.581962787 |
